# Supplementary material for: Novel genetic associations for blood pressure identified via gene-alcohol interaction in up to 570K individuals across multiple ancestries
Source: PLoS One. 2018 Jun 18;13(6):e0198166. doi: 10.1371/journal.pone.0198166 (PMC6005576; doi:10.1371/journal.pone.0198166)
Supplement: S1 Table — Characteristics of blood pressure (BP) in current drinkers (yes or no), within sub-sample of individuals with or without anti-hypertensive (BP Lowering) medications, and in combined samples; SBP, systolic BP; DBP, diastolic BP; MAP, mean arterial pressure; PP, pulse pressure; N, number of individuals; mean, mean levels; SD, standard deviation of mean; Min, minimum value; Max, maximum value; For each BP trait (SBP, DBP, MAP, and PP), the extreme BP values were winsorised if a BP value was greater than 6 SD, above or below the mean, setting the BP value exactly at 6 SDs from the mean. (XLSX) [file pone.0198166.s021.xlsx]

## Sheet: S1 Table. Descriptives_BP_CURD
S1 Table. Descriptive analyses for discovery data (Stage 1) in current drinkers. Characteristics of blood pressure (BP) in current drinkers (yes or no), within sub-sample of individuals with or without anti-hypertensive (BP Lowering) medications, and in combined samples
				Subset sample that are Not taking BP lowering medications								Subset sample that are Taking any BP lowering medications										Combined data (not taking BP lowering medications and taking BP lowering medications), after correcting for medication use
				European Ancestry								European Ancestry										European Ancestry
Study Name	Cohort	Traits (mm Hg)		N	Mean	SD	Min	Max	Age Mean (Min; Max age)	% Men		N	Mean	SD	Min	Max	Age Mean (Min; Max age)	% Men		Traits (mm Hg)		N	Mean	SD	Min	Max	Age Mean (Min; Max age)	% Men	N observations winsorized
Age Gene/Environment Susceptibility Reykjavik Study	AGES	SBP		930	138	18.21	94	225	73.5 (66.0; 80.0)	42.26		1464	143	19.97	94	253	74.2 (66.0; 80.0)	41.73		SBP		2394	150.2	21.62	94	268	73.9 (66.0; 80.0)	41.94	0
		DBP		930	74.87	8.848	29	112	73.5 (66.0; 80.0)	42.26		1464	74.47	9.877	30	145	74.2 (66.0; 80.0)	41.73		DBP		2394	80.74	10.55	29	144.4	73.9 (66.0; 80.0)	41.94	1
																				MAP		2394	69.5	17.83	19	173	73.9 (66.0; 80.0)	41.94	0
																				PP		2394	103.9	12.64	54	180	73.9 (66.0; 80.0)	41.94	1
Atherosclerosis Risk In Communities Study	ARIC	SBP		7609	116.02	15.78	63	203	53.8 (44.0; 65.0)	46.68		1862	128.29	17.67	61	206	56.2 (45.0; 66.0)	47.58		SBP		9471	121.38	19.46	63	221	54.3 (44.0; 66.0)	46.92	0
		DBP		7609	70.61	9.56	40	130	53.8 (44.0; 65.0)	46.68		1862	75.82	10.2	34	129	56.2 (45.0; 66.0)	47.58		DBP		9471	73.6	11.42	40	139	54.3 (44.0; 66.0)	46.92	0
																				MAP		9471	89.53	13.2	53.67	166.33	54.3 (44.0; 66.0)	46.92	1
																				PP		9471	47.78	13.24	0	127.21	54.3 (44.0; 66.0)	46.92	1
Coronary Artery Risk Development in Young Adults	CARDIA	SBP		1644	109.045	10.7662	75	151	25.6 (18.0; 32.0)	46		11	121	10.5736	105	136	27.6 (24.0; 30.0)	63.6		SBP		1655	109.224	10.9825	75	151	25.6 (18.0; 32.0)	46.5	0
		DBP		1644	68.205	8.99076	23	102	25.6 (18.0; 32.0)	46		11	82.0909	11.3794	60	103	27.6 (24.0; 30.0)	63.6		DBP		1655	68.3637	9.21131	23	113	25.6 (18.0; 32.0)	46.5	0
																				MAP		1655	81.9838	8.89131	42.6667	125.667	25.6 (18.0; 32.0)	46.5	0
																				PP		1655	40.8601	8.92854	18	84	25.6 (18.0; 32.0)	46.5	0
Cardiovascular Health Study	CHS	SBP		1907	131.19	19.52	79	219	71.0 (65.0; 80.0)	39		1056	139.73	21.07	90	223	71.5 (65.0; 80.0)	35.7		SBP		2963	139.58	23.03	79	238	71.2 (65.0; 80.0)	37.8	0
		DBP		1907	69.91	10.74	40	113	71.0 (65.0; 80.0)	39		1056	71.96	11.48	40	116	71.5 (65.0; 80.0)	35.7		DBP		2963	74.2	12.43	40	126	71.2 (65.0; 80.0)	37.8	0
																				MAP		2963	96	14.36	55.33	160.67	71.2 (65.0; 80.0)	37.8	0
																				PP		2963	65.38	18.2	12	140	71.2 (65.0; 80.0)	37.8	0
CROATIA-Korcula	CROATIA-Korcula	SBP		221	121.8	10.82	93	144	48.9 (18.0;80.0)	26		237	165.73	17.31	125	222.5	60.3 (20.0;80.0)	37		SBP		458	144.53	26.34	93	222.5	54.8 (18.0;80.0)	32	1
		DBP		221	75.86	5.85	61	89	48.9 (18.0;80.0)	26		237	94.68	9.38	68	120	60.3 (20.0;80.0)	37		DBP		458	85.6	12.27	61	120	54.8 (18.0;80.0)	32	3
																				MAP		458	105.24	16.18	73.6667	150.833	54.8 (18.0;80.0)	32	1
																				PP		458	58.93	17.74	23	119	54.8 (18.0;80.0)	32	1
CROATIA-Vis	CROATIA-Vis	SBP		362	131.27	20.28	89.5	205	51.5 (18.0;80.0)	42		94	153.64	25.02	114	225	64.1 (32.0;80.0)	35		SBP		456	138.98	26.14	89.5	240	54.1 (18.0;80.0)	41	2
		DBP		362	79.82	10.42	55	130	51.5 (18;80)	42		94	86.4	11.21	61	125	64.1 (32.0;80.0)	35		DBP		456	83.24	12.53	55	135	54.1 (18.0;80.0)	41	1
																				MAP		456	101.82	16	70.8333	170	54.1 (18.0;80.0)	41	1
																				PP		456	55.74	18.53	15	126	54.1 (18.0;80.0)	41	1
Erasmus Rucphen family study	ERF	SBP		2224	137.026	18.5152	85.5	224.5	46.0 (18.0;79.6)	44.24		548	153.333	22.1498	100.5	239	59.7 (22.0;79.7)	47.81		SBP		2772	143.215	22.9648	85.5	254	48.7 (18.0;79.7)	44.95	0
		DBP		2224	79.7255	9.72524	53.5	120	46.0 (18.0;79.6)	44.24		548	83.542	10.4072	53.5	127.5	59.7 (22.0;79.7)	47.81		DBP		2772	82.4569	11.2936	53.5	137.5	48.7 (18.0;79.7)	44.95	0
																				MAP		2772	102.71	14.1478	68.5	176.3	48.7 (18.0;79.7)	44.95	0
																				PP		2772	60.7581	16.5224	21.5	133	48.7 (18.0;79.7)	44.95	0
Family Heart Study	FamHS	SBP		2758	114.176	15.849	72	186	48.9 (25.2; 79.5)	46.92		835	125.937	19.405	69.3	238.7	61.2 (28.0; 79.9)	50.18		SBP		3593	120.396	20.1995	72	253.7	51.8 (25.2; 79.9)	47.65	1
		DBP		2758	68.4261	9.65557	33.3	106.7	48.9 (25.2; 79.5)	46.92		835	70.2451	10.3058	40.7	100	61.2 (28.0; 79.9)	50.18		DBP		3593	71.1728	11.0065	33.3	110	51.8 (25.2; 79.9)	47.65	0
																				MAP		3593	87.5804	12.8698	48.0333	152.567	51.8 (25.2; 79.9)	47.65	0
																				PP		3593	49.2228	15.1695	20	151.7	51.8 (25.2; 79.9)	47.65	1
FraMingham Heart Study	FHS	SBP		7742	118.64	14.32	70	209	37.6 (18.0; 72.0)	45.4		405	146.98	17.58	113	214.62	46.8 (20.0; 69.0)	53.6		SBP		8147	120.05	15.76	70	214.62	38.0 (18.0; 72.0)	45.8	1
		DBP		7739	76.57	9.87	38	125	37.6 (18; 72)	45.4		405	93.77	11.14	66	133	46.8 (20.0; 69.0)	53.6		DBP		8144	77.43	10.61	38	133	38.0 (18.0; 72.0)	45.8	0
																				MAP		8144	42.62	9.75	17	101.13	38.0 (18.0; 72.0)	45.8	2
																				PP		8144	91.63	11.69	52.67	157.67	38.0 (18.0; 72.0)	45.8	0
Genetic Epidemiology Network of Arteriopathy	GENOA	SBP		507	128.19	17.09	89	195	50.2 (24.9; 78.4)	48.1		922	135.54	16.39	87	215	57.9 (32.1; 79.9)	43.1		SBP		1429	142.61	19.78	89	230	55.1 (24.9; 79.9)	44.9	0
		DBP		507	78.02	9.71	53	106	50.2 (24.9; 78.4)	48.1		922	78.8	9.52	38	111	57.9 (32.1; 79.9)	43.1		DBP		1429	84.98	10.88	48	121	55.1 (24.9; 79.9)	44.9	0
																				MAP		1429	104.19	12.6	66	142	55.1 (24.9; 79.9)	44.9	0
																				PP		1429	57.63	15.11	23	134	55.1 (24.9; 79.9)	44.9	0
Genetics of Lipid Lowering Drugs and Diet Network	GOLDN	SBP		667	113.51	15	71	209	45.3 (18.0; 79.9)	48.3		148	125		70	184	63.6 (35.0; 79.6)	54		SBP		815	118.3	18.68	71	209	48.6(18.0; 79.9)	49.3	0
		DBP		667	67.8	9.02	41	96	45.3 (18.0; 79.9)	48.3		148	71.03		43	108	63.6 (35.0; 79.6)	54		DBP		815	70.2	10.56	41	118	48.6(18.0; 79.9)	49.3	0
																				MAP		815	86.24	12.26	56.33	139	48.6(18.0; 79.9)	49.3	0
																				PP		815	48.12	13.43	19	129.13	48.6(18.0; 79.9)	49.3	1
Generation Scotland: Scottish Family Health Study	GS:SFHS	SBP		5341	132.35	17.48	80	216	51.9 (18.0;80.0)	39		1163	157.61	18.03	107	232	61.7 (30.0;80.0)	49		SBP		6504	136.87	20.07	80	232	53.6 (18.0;80.0)	41	1
		DBP		5341	80.71	10.08	42	124	51.9 (18.0;80.0)	39		1163	92.77	10.14	57	126	61.7 (30.0;80.0)	49		DBP		6504	82.86	11.1	42	126	53.6 (18.0;80.0)	41	1
																				MAP		6504	100.86	13.24	54.6667	152.667	53.6 (18.0;80.0)	41	1
																				PP		6504	54	13.58	23	134	53.6 (18.0;80.0)	41	1
Health, Aging and Body Composition	HABC	SBP		831	130.48	18.39	85	204	73.7 (69.0, 80.0)	46.92		822	137.02	20.95	85	218	73.8 (69.0, 80.0)	51.22		SBP		1653	141.19	22.45	85	233	73.8 (69.0, 80.0)	52.81	0
		DBP		831	69.81	10.75	35	105	73.7 (69.0, 80.0)	46.92		822	70.2	11.23	30	106	73.8 (69.0, 80.0)	51.22		DBP		1653	74.97	12.15	35	116	73.8 (69.0, 80.0)	52.81	0
																				MAP		1653	97.05	13.98	55.33	151.67	73.8 (69.0, 80.0)	52.81	0
																				PP		1653	66.22	17.87	26	161	73.8 (69.0, 80.0)	52.81	0
HERITAGE Family Study	HER	SBP		499	116.5	11.03	86	152	35.8 (18.0; 65.2)	48.9										SBP		499	116.5	11.03	86	152	35.8 (18.0; 65.2)	48.9	0
		DBP		499	66.2	8.3	45	96	35.8 (18.0; 65.2)	48.9										DBP		499	66.2	8.33	45	96	35.8 (18.0; 65.2)	48.9	0
																				MAP		499	82.9	8.45	62.3	114.3	35.8 (18.0; 65.2)	48.9	0
																				PP		499	50.3	8.33	28.8	81.5	35.8 (18.0; 65.2)	48.9	0
Gene-Lifestyle Interaction	HyperGen	SBP		610	115.89	15	79.5	174	39.4 (18.0;74.0)	53.44		635	130.67	20.03	79.5	216	59.7 (28.0;80.0)	47.09		SBP		1245	131.08	23.16	79.5	231	49.8 (18.0,80.0)	50.2	0
		DBP		610	70.02	8.87	44.5	104.5	39.4 (18.0;74.0)	53.44		635	71.46	11.03	42.5	109.5	59.7 (28.0;80.0)	47.09		DBP		1245	75.856	11.54	44.5	119.5	49.8 (18.0,80.0)	50.2	0
																				MAP		1245	94.264	14.315	56.166	148.666	49.8 (18.0,80.0)	50.2	0
																				PP		1245	55.22	16.8	23	132	49.8 (18.0,80.0)	50.2	0
The Multi-Ethnic Study of Atherosclerosis	MESA	SBP		1734	119.25	18.7	77	205.5	60.6 (44.0;80.0)	47.42		840	129.26	20.88	75	218	65.2 (45.0;80.0)	48.8		SBP		2574	127.39	22.7	77	233	62.1 (44.0;80.0)	47.86	0
		DBP		1734	69.61	9.82	37	108	60.6 (44.0;80.0)	47.42		840	70.93	10.19	41	107	65.2 (45.0;80.0)	48.8		DBP		2574	73.29	11.27	37	117	62.1 (44.0;80.0)	47.86	0
																				MAP		2574	91.33	13.91	56	155.67	62.1 (44.0;80.0)	47.86	0
																				PP		2574	54.1	16.85	19.5	130	62.1 (44.0;80.0)	47.86	0
Netherlands Epidemiology Obesity	NEO	SBP		3951	131.3	16.9	85	222	55.1 (44.0;66.0)	47.8		1782	136.3	17.3	85	213	57.9 (44.0;66.0)	48.7		SBP		5733	137.5	19.4	84.7	228.3	56.0 (44.0;66.0)	48.1	0
		DBP		3951	84.5	10.3	45	145	55.1 (44.0;66.0)	47.8		1782	86.4	10.3	54	143	57.9 (44.0;66.0)	48.7		DBP		5733	88.2	11.7	44.7	153.3	56.0 (44.0;66.0)	48.1	0
																				MAP		5733	104.6	13.6	59.0	178.3	56.0 (44.0;66.0)	48.1	0
																				PP		5733	49.3	11.6	18.3	147.7	56.0 (44.0;66.0)	48.1	0
Rotterdam study	RS1	SBP		1752	140.268	20.2099	89	234	69.6 (61.4;80.0)	43.3		1145	147.114	21.9197	88	236	71.3 (61.4;80.0)	44.5		SBP		2897	148.902	23.4705	89	251	70.3 (61.4;80.0)	43.8	0
		DBP		1752	75.1039	10.5094	42	116	69.6 (61.4;80.0)	43.3		1145	76.455	11.9567	41	145.5	71.3 (61.4;80.0)	44.5		DBP		2897	79.5903	12.4122	42	155.5	70.3 (61.4;80.0)	43.8	1
																				MAP		2897	102.694	14.7199	65	167.8	70.3 (61.4;80.0)	43.8	0
																				PP		2897	69.3122	17.7042	28	159	70.3 (61.4;80.0)	43.8	0
Rotterdam study	RS2	SBP		1455	139.477	19.5843	85	235	62.7 (55.1;79.9)	46.87		548	149.466	22.0452	90	211	65.2 (55.1;80.0)	45.26		SBP		2003	146.314	23.1412	85	235	63.4 (55.1;80.0)	46.43	0
		DBP		1455	78.4086	10.4338	47	128	62.7 (55.12;79.92)	46.87		548	81.3184	11.4068	43.5	143	65.2 (55.1;80.0)	45.26		DBP		2003	81.9406	12.1555	47	153	63.4 (55.1;80.0)	46.43	0
																				MAP		2003	103.398	14.5744	64.33	176.7	63.4 (55.1;80.0)	46.43	0
																				PP		2003	64.3729	17.0491	24	151	63.4 (55.1;80.0)	46.43	0
Rotterdam study	RS3	SBP		2188	130.573	18.5165	80	224	56.0 (45.5;79.8)	41.96		771	138.23	18.5503	95	220	58.8 (46.0;79.8)	48.9		SBP		2959	136.477	21.0239	80	235	56.7 (45.5;79.8)	43.76	0
		DBP		2188	81.6728	10.8288	50	129	56.0 (45.5;79.8)	41.96		771	85.0921	10.8204	56	128	58.8 (46.0;79.8)	48.9		DBP		2959	85.1693	12.3241	50	138	56.7 (45.5;79.8)	43.76	0
																				MAP		2959	102.272	14.5301	61.33	161	56.7 (45.5;79.8)	43.76	0
																				PP		2959	51.3072	12.9848	19	119	56.7 (45.5;79.8)	43.76	0
Women's Genome Health Study	WGHS	SBP		20029	121.41	12.44	105	185	53.7 (38.0, 89.0)	0		2993	138.58	12.07	105	185	57.3 (45.0, 84.0)	0		SBP		23022	125.59	16.45	105	200	54.2 (38.0, 89.0)	0	0
		DBP		20029	75.46	8.58	60	110	53.7 (38.0, 89.0)	0		2993	85.07	7.13	60	110	57.3 (45.0, 84.0)	0		DBP		23022	78.01	10.69	60	120	54.2 (38.0, 89.0)	0	0
																				MAP		23033	93.87	11.94	75	146.67	54.2 (38.0, 89.0)	0	0
																				PP		23022	47.58	10.37	5	105	54.2 (38.0, 89.0)	0	0
Women's Health Initiative	GARNET	SBP		2385	127.17	16.76	85	193	64.6 (50.0, 79.0)	0		1026	138.14	18.05	97	196	66.6 (50.0, 79.0)	0		SBP		3411	134.98	20.89	85	211	65.2 (50.0;79.0)	0	0
		DBP		2385	74.86	9.06	40	103	64.6 (50.0, 79.0)	0		1026	78.01	9.72	45	104	66.6 (50.0, 79.0)	0		DBP		3411	78.82	11.05	40	114	65.2 (50.0;79.0)	0	0
																				MAP		3411	97.54	13.07	57.33	142.67	65.2 (50.0;79.0)	0	0
																				PP		3411	56.17	15.88	17	123	65.2 (50.0;79.0)	0	0
Women's Health Initiative	WHIMS	SBP		3312	126.95	16.64	81	193	67.6 (50.0, 81.0)	0		1137	139.08	17.31	92	195	69.3 (51.0, 79.0)	0		SBP		4449	133.88	20.56	81	210	68.0 (50.0;81.0)	0	0
		DBP		3312	73.94	8.65	40	100	67.6 (50.0, 81.0)	0		1137	77.48	9.12	47	104	69.3 (51.0, 79.0)	0		DBP		4449	77.4	10.57	40	114	68.0 (50.0;81.0)	0	0
																				MAP		4449	96.23	12.67	58.33	143	68.0 (50.0;81.0)	0	0
																				PP		4449	56.48	15.73	12	130	68.0 (50.0;81.0)	0	0
				African Ancestry								African Ancestry										African Ancestry
Study Name	Cohort	Traits (mm Hg)		N	Mean	SD	Min	Max	Age Mean (Min; Max age)	% Men		N	Mean	SD	Min	Max	Age Mean (Min; Max age)	% Men		Traits (mm Hg)		N	Mean	SD	Min	Max	Age Mean (Min; Max age)	% Men	N5 observations winsorized
Atherosclerosis Risk In Communities Study	ARIC	SBP		1691	125.7	20.27	73	235	52.6(44.0; 65.0)	41.74		1176	132.68	21.7	83	242	54.5 (44.0; 65.0)	30.62		SBP		2867	134.72	23.5	73	257	53.4 (44.0; 65.0)	37.2	0
		DBP		1691	78.47	11.85	47	136	52.6 (44.0; 65.0)	41.74		1176	81.99	12.08	52	142	54.5 (44.0; 65.0)	30.62		DBP		2867	84.02	13.67	47	152	53.4 (44.0; 65.0)	37.2	1
																				MAP		2867	100.92	15.79	59.33	179.67	53.4 (44.0; 65.0)	37.2	0
																				PP		2867	50.7	16.34	17	144	53.4 (44.0; 65.0)	37.2	1
Coronary Artery Risk Development in Young Adults	CARDIA	SBP		935	111.11	10.5866	86	166	24.4 (18.0; 34.0)	39		13	124.692	12.0096	98	145	27.4 (23.0; 31.0)	15.4		SBP		948	111.502	11.1097	86	166	24.4 (18.0; 34.0)	38.7	0
		DBP		935	68.9668	9.58993	24	107		39		13	81.3077	13.4374	59	104	27.4 (23.0; 31.0)	15.4		DBP		948	69.2732	9.98749	24	114	24.4 (18.0; 34.0)	38.7	0
																				MAP		948	83.3495	9.34481	54.3333	129.333	24.4 (18.0; 34.0)	38.7	0
																				PP		948	42.2289	9.56158	14	91	24.4 (18.0; 34.0)	38.7	0
Cardiovascular Health Study	CHS	SBP		271	135.97	19.34	91.77	190.77	71.2 (65.0; 80.0)	46.9		466	144.22	23.96	84.77	234.77	71.7 (65.0; 80.0)	32.2		SBP		737	150.67	25.02	91.77	249.77	71.5 (65.0; 80.0)	37.6	0
		DBP		271	74.7	10.11	47.44	103.44	71.2 (65.0; 80.0)	46.9		465	75.57	11.59	40	109.44	71.7 (65.0; 80.0)	32.3		DBP		736	81.57	12.24	47.44	119.44	71.5 (65.0; 80.0)	37.6	0
																				MAP		736	104.56	14.91	66.22	151.55	71.5 (65.0; 80.0)	37.6	0
																				PP		736	68.98	19.3	21.33	158	71.5 (65.0; 80.0)	37.6	0
Family Heart Study	FamHS	SBP		224	127.299	24.4332	84	222	48.1 (31.0; 80.0)	39.29		393	134.01	24.4067	74	228	56.0 (30.0; 79.0)	31.55		SBP		617	141.128	26.5399	84	243	53.1 (30.0; 80.0)	34.36	0
		DBP		224	75.5746	12.0932	43.7	122.3	48.1 (31.0; 80.0)	39.29		393	75.931	11.6716	47.3	121	56.0 (30.0; 79.0)	31.55		DBP		617	82.1712	12.8248	43.7	131	53.1 (30.0; 80.0)	34.36	0
																				MAP		617	101.823	16.2227	58.1333	168.333	53.1 (30.0; 80.0)	34.36	0
																				PP		617	58.9569	19.123	24	141.7	53.1 (30.0; 80.0)	34.36	0
Genetic Epidemiology Network of Arteriopathy	GENOA	SBP		433	130.11	21.27	88	213	52.7 (20.5; 79.6)	32.8		551	138.94	22.23	87	223	58.3 (23.5; 79.5)	27.6		SBP		984	143.46	24.81	88	238	55.8 (20.5; 79.6)	29.9	0
		DBP		433	78.09	12.06	46	129	52.7 (20.5; 79.6)	32.8		551	78.51	12.49	37	118	58.3 (23.5; 79.5)	27.6		DBP		984	83.93	13.34	46	129	55.8 (20.5; 79.6)	29.9	0
																				MAP		984	103.77	15.68	60	164.66	55.8 (20.5; 79.6)	29.9	0
																				PP		984	59.53	18.75	26	146	55.8 (20.5; 79.6)	29.9	0
Health, Aging and Body Composition	HABC	SBP		427	136.05	21.53	77	219	73.4 (69.0, 80.0)	51.99		707	140.39	22.34	80	221	73.5 (68.0, 80.0)	37.06		SBP		1134	148.11	23.94	77	236	73.4 (68.0, 80.0)	42.68	0
		DBP		427	72.73	12.33	34	120	73.4 (69.0, 80.0)	51.99		707	73.9	12.56	30	118	73.5 (68.0, 80.0)	37.06		DBP		1134	79.69	13.59	34	128	73.4 (68.0, 80.0)	42.68	0
																				MAP		1134	102.5	15.2	60.33	153	73.4 (68.0, 80.0)	42.68	0
																				PP		1134	68.41	19.35	16	153	73.4 (68.0, 80.0)	42.68	0
The Healthy Aging in Neighborhoods of Diversity across the Life Span (HANDLS) study	HANDLS	SBP		561	119.263	16.312	80	176	45.9 (30.0;64.0)	50.3		322	143.036	19.0588	103	196	53.4 (30.0;64.0)	38.5		SBP		883	127.932	20.79	80	196	48.6 (30.0;64.0)	46	0
		DBP		561	72.2273	11.1933	41	107.5	45.9 (30.0;64.0)	51.3		322	85.868	11.5833	55	120	53.4 (30.0;64.0)	39.5		DBP		883	77.2016	13.0973	41	120	48.6 (30.0;64.0)	46	0
																				MAP		883	94.1127	14.7895	56.7	145.3	48.6 (30.0;64.0)	46	0
																				PP		883	50.7305	13.3699	22	109	48.6 (30.0;64.0)	46	0
Howard University Family Study	HUFS	SBP		1255	122.02	17.85	77	222.5	38.8 (18.0; 79.0)	39.4		427	139.58	23	79	227	53.6 (20.0; 79.0)	33.49		SBP		1682	130.21	23.91	77	242	42.6 (18.0; 79.0)	37.91	0
		DBP		1255	78	12.1	42	156	38.8 (18.0; 79.0)	39.4		427	85.3	13.42	50	143.5	53.6 (20.0; 79.0)	33.49		DBP		1682	82.32	14.54	42	156	42.6 (18.0; 79.0)	37.91	0
																				MAP		1682	98.35	16.86	53.67	178.17	42.6 (18.0; 79.0)	37.91	0
																				PP		1682	47.89	14.61	13	135.7	42.6 (18.0; 79.0)	37.91	1
Gene-Lifestyle Interaction	HyperGen	SBP		482	123.33	19.68	89.5	195	35.0 (18.0; 71.0)	38.8		758	132.77	22.76	76	221	51.6 (23.0;79.0)	28.6		SBP		1240	138.27	24.67	89.5	236	45.1 (18.0; 79.0)	32.58	0
		DBP		482	72.35	11.74	47.5	114	35.0 (18.0; 71.0)	38.8		758	74.9	11.34	41.5	123.5	51.6 (23.0;79.0)	28.6		DBP		1240	80.02	13.02	47.5	133.5	45.1 (18.0; 79.0)	32.58	0
																				MAP		1240	99.44	15.89	65.67	167.666	45.1 (18.0; 79.0)	32.58	0
																				PP		1240	58.25	16.89	21.5	123.5	45.1 (18.0; 79.0)	32.58	0
Jackson Heart Study	JHS	SBP		1257	120.7	16.42	73	200	45.0 (21.0; 80.0)	30.7		831	129.57	18.41	84	210	54.8 (25.0; 80.0)	47.6		SBP		2088	131.04	20.84	73	225	49.4 (21.0; 80.0)	39.8	0
		DBP		1257	79.43	10.44	48	123	45.0 (21.0; 80.0)	30.7		831	80.72	10.63	49	121	54.8 (25.0; 80.0)	47.6		DBP		2088	84.38	11.85	48	131	49.4 (21.0; 80.0)	39.8	0
																				MAP		2088	99.94	13.6	56.33	151	49.4 (21.0; 80.0)	39.8	0
																				PP		2088	46.66	15.53	14	133	49.4 (21.0; 80.0)	39.8	0
The Multi-Ethnic Study of Atherosclerosis	MESA	SBP		830	125.52	20.01	80.5	205	58.9 (45.0;80.0)	49.1		821	136.89	21.44	67	230.5	64.6 (45.0;80.0)	42.51		SBP		1651	138.61	24.57	80.5	245.5	61.7 (45.0;80.0)	45.75	0
		DBP		830	73.79	9.63	46.5	107.5	58.9 (45.0;80.0)	49.1		821	75.2	10.87	46.5	118.5	64.6 (45.0;80.0)	42.51		DBP		1651	79.45	11.74	46.5	128.5	61.7 (45.0;80.0)	45.75	0
																				MAP		1651	99.17	14.83	61.67	157.17	61.7 (45.0;80.0)	45.75	0
																				PP		1651	59.16	18.17	19.5	154	61.7 (45.0;80.0)	45.75	0
Women's Health Initiative	WHI	SBP		3555	127.36	16.44	80	198	60.4 (50.0, 79.0)	0		3031	137.06	17.85	84	220	62.6 (50.0, 79.0)	0		SBP		6586	138.72	21.07	80	235	61.4 (50.0, 79.0)	0	0
		DBP		3555	76.83	8.93	46	110	60.4 (50.0, 79.0)	0		3031	79.69	9.66	41	115	62.6 (50.0, 79.0)	0		DBP		6586	82.75	11.27	46	125	61.4 (50.0, 79.0)	0	0
																				MAP		6586	101.41	13.31	59.33	159	61.4 (50.0, 79.0)	0	0
																				PP		6586	55.98	15.81	17	133	61.4 (50.0, 79.0)	0	0
				Asian Ancestry								Asian Ancestry										Asian Ancestry
Study Name	Cohort	Traits (mm Hg)		N	Mean	SD	Min	Max	Age Mean (Min; Max age)	% Men		N	Mean	SD	Min	Max	Age Mean (Min; Max age)	% Men		Traits (mm Hg)		N	Mean	SD	Min	Max	Age Mean (Min; Max age)	% Men	N5 observations winsorized
Genetic Epidemiology Network of Salt-Sensitivity	GenSalt	SBP		1828	117.2	14.2	80.9	176.9	39.3 (18.0; 62.0)	52.95		7	124.5	13.1	100	142.4	45.0 (32.0; 55.0)	28.57		SBP		1835	117.3	14.2	80.9	176.9	39.3 (18.0; 88.0)	52.86	0
		DBP		1828	74	10.2	39.8	109.3	39.3 (18.0; 62.0)	52.95		7	78.6	6.4	64.4	82.2	45.0 (32.0; 55.0)	28.57		DBP		1835	74.1	10.2	39.8	109.3	39.3 (18.0; 88.0)	52.86	0
																				MAP		1835	88.5	10.8	58.7	126.4	39.3 (18.0; 88.0)	52.86	0
																				PP		1835	43.2	9.5	18.7	88	39.3 (18.0; 88.0)	52.86	0
The Multi-Ethnic Study of Atherosclerosis	MESA	SBP		537	119.06	19.18	77.5	208.5	60.0 (44.0;80.0)	49.1		208	136.34	20.95	88.5	204	66.3 (45.0;80.0)	48.5		SBP		745	128.07	24.44	77.5	219	58.0 (44.4; 79.9)	48.86	0
		DBP		537	70.76	10.13	43.5	109	60.0 (44.0;80.0)	49.1		208	75.34	10.33	53	108	66.3 (45.0;80.0)	48.5		DBP		745	74.83	12.1	43.5	118	58.0 (44.4; 79.9)	48.86	0
																				MAP		745	92.58	15.17	56.67	150	58.0 (44.4; 79.9)	48.86	0
																				PP		745	53.24	17.32	20.5	120.5	58.0 (44.4; 79.9)	48.86	0
The Singapore Chinese Eye Study	SCES	SBP		903	132.19	18.8878	88	225.00	54.6 (44.5; 79.6)	52		947	138.406	18.4273	82.5	205	61.3 (44.4; 79.9)	50.8		SBP		1850	143.051	21.4544	88	225	58.0 (44.4; 79.9)	51.4	0
		DBP		903	78.5445	10.1749	52	114.33	54.6 (44.5; 79.6)	52		947	77.6466	9.18843	51.5	107	61.3 (44.4; 79.9)	50.8		DBP		1850	83.2038	10.6963	52	117	58.0 (44.4; 79.9)	51.4	0
																				MAP		1850	103.153	13.1397	67.1667	151.333	58.0 (44.4; 79.9)	51.4	0
																				PP		1850	59.85	16.02	25.50	118.67	58.0 (44.4; 79.9)	51.4	0
Singapore Chinese Health Study cases	SCHS cases	SBP		379	145.966	22.9855	80	234.667	65.9 (49.7; 79.5)	67.1		295	142.615	18.8105	88	211.333	67.9 (49.8; 79.9)	61.2		SBP		674	149.374	21.2521	83	234.667	66.7 (49.7; 79.9)	64.4	0
		DBP		379	82.6825	11.7402	48	130.667	65.9 (49.7; 79.5)	67.1		295	79.9198	8.48198	54	114.667	67.9 (49.8; 79.9)	61.2		DBP		674	83.1803	11.6991	50	130.67	66.7 (49.7; 79.9)	64.4	0
																				MAP		674	66.1159	18.3098	25.667	140.667	66.7 (49.7; 79.9)	64.4	0
																				PP		674	105.219	14.26	65.888	154.778	66.7 (49.7; 79.9)	64.4	0
Singapore Chinese Health Study controls	SCHS controls	SBP		823	137.063	21.3412	82	225.666	65.7 (50.0; 79.9)	64.8		395	141.552	15.6919	98	210.333	68.1 (51.2; 79.9)	59.8		SBP		1218	140.034	21.5595	84	225.666	66.5 (50.0; 79.9)	65.5	0
		DBP		823	79.9862	10.6801	52.666	122.333	65.7 (50.0; 79.9)	64.8		395	79.3224	7.24023	53.6666	103.333	68.1 (51.2; 79.9)	59.8		DBP		1218	80.6002	10.4873	52.667	122.333	66.5 (50.0; 79.9)	65.5	0
																				MAP		1218	100.411	12.9363	64.2222	151.333	66.5 (50.0; 79.9)	65.5	0
																				PP		1218	59.433	16.5559	25	137	66.5 (50.0; 79.9)	65.5	0
The Singapore Malay Eye Study	SiMES	SBP		1944	146.264	23.9613	84.5	275.00	57.9 (40.0; 80.0)	51.8		583	153.2	23.07	96	229	63.1 (41.0; 80.0)	41.3		SBP		2527	151.324	25.4883	84.5	275	59.1 (40.0; 80.0)	49.4	0
		DBP		1944	80.348	11.4078	48.5	131	57.9 (40.0; 80.0)	51.8		583	79.1	11.08	53	123.5	63.1 (41.0; 80.0)	41.3		DBP		2527	82.3668	11.9148	48.5	133.5	59.1 (40.0; 80.0)	49.4	0
																				MAP		2527	105.353	15.1632	66.1667	179	59.1 (40.0; 80.0)	49.4	0
																				PP		2527	68.96	19.12	27.5	144	59.1 (40.0; 80.0)	49.4	0
The Singapore Indian Eye Study	SINDI	SBP		1578	132.287	19.6436	82	216.00	55.0 (43.0; 80.0)	49.1		913	140.71	19.11	87.5	237	62.2 (43.0; 80.0)	53.8		SBP		2491	140.871	22.4829	82	252	57.6 (43.0; 80.0)	50.8	0
		DBP		1578	77.7319	10.1661	52	126.5	55.0 (43.0; 80.0)	49.1		913	76.96	10.17	43	136	62.2 (43.0; 80.0)	53.8		DBP		2491	81.1154	11.0965	52	146	57.6 (43.0; 80.0)	50.8	0
																				MAP		2491	101.034	13.6368	66.6667	181.333	57.6 (43.0; 80.0)	50.8	0
																				PP		2491	59.76	17.05	23	121	57.6 (43.0; 80.0)	50.8	0
The Singapore Prospective Cohort Study Program	SP2-1M	SBP		470	126.301	16.3952	90	195.5	45.5 (24.6; 78.7)	72.6		50	143.72	15.84	115	183.5	54.2 (34.8; 74.6)	86.0		SBP		520	129.418	18.924	90	198.5	46.4 (24.6; 78.7)	73.8	0
		DBP		470	77.5745	10.748	53.5	119.5	45.5 (24.6; 78.7)	72.6		50	87.17	8.22	70	107.5	54.2 (34.8; 74.6)	86.0		DBP		520	79.4587	12.0088	53.5	119.5	46.4 (24.6; 78.7)	73.8	0
																				MAP		520	96.1119	13.604	68.6667	139.833	46.4 (24.6; 78.7)	73.8	0
																				PP		520	49.96	11.7	28	99	46.4 (24.6; 78.7)	73.8	0
The Singapore Prospective Cohort Study Program	SP-610	SBP		452	123.199	18.5972	90.5	192.5	44.9 (23.2; 78.1)	32.5		53	145.81	18.78	104.5	198	57.5 (34.9; 80.0)	47.2		SBP		505	127.147	21.8864	90.5	213	46.2 (23.2; 80)	34.1	0
		DBP		452	73.6195	10.006	52	118	44.9 (23.2; 78.1)	32.5		53	81.92	10.42	65.5	111.5	57.5 (34.9; 80.0)	47.2		DBP		505	75.5396	11.5018	52	121.5	46.2 (23.2; 80)	34.1	0
																				MAP		505	92.7419	14.151	66.5	149.5	46.2 (23.2; 80)	34.1	0
																				PP		505	51.61	14.64	26	114	46.2 (23.2; 80)	34.1	0
				Hispanic Ancestry								Hispanic Ancestry										Hispanic Ancestry
Study Name	Cohort	Traits (mm Hg)		N	Mean	SD	Min	Max	Age Mean (Min; Max age)	% Men		N	Mean	SD	Min	Max	Age Mean (Min; Max age)	% Men		Traits (mm Hg)		N	Mean	SD	Min	Max	Age Mean (Min; Max age)	% Men	N5 observations winsorized
The Multi-Ethnic Study of Atherosclerosis	MESA	SBP		970	121.09	19.21	80	204	58.7(44.0;80.0)	50.2		484	136.51	22.3	80.5	211.5	65.0 (45.0;80.0)	44.5		SBP		1454	131.21	24.83	80	226.5	60.8(44.0;80.0)	48.38	0
		DBP		970	70.56	9.68	43	108.5	58.7(44.0;80.0)	50.2		484	73.43	10.59	47.5	108.5	65.0 (45.0;80.0)	44.5		DBP		1454	74.84	11.68	43	118.5	60.8(44.0;80.0)	48.38	0
																				MAP		1454	93.63	14.86	57	154.5	60.8(44.0;80.0)	48.38	0
																				PP		1454	56.36	18.46	24	131.5	60.8(44.0;80.0)	48.38	0
Women's Health Initiative	WHI	SBP		2096	122.14	15.68	84	187	60.0 (50.0,79.0)	0		505	136.44	16.41	96	191	62.1 (50.0, 79.0)	0		SBP		2601	127.83	19.61	84	206	60.1 (50.0, 79.0)	0	0
		DBP		2096	73.9	8.59	50	105	60.0 (50.0,79.0)	0		505	79.55	9.42	57	112	62.1 (50.0, 79.0)	0		DBP		2601	76.94	10.72	50	122	60.1 (50.0, 79.0)	0	0
																				MAP		2601	93.9	12.71	62	142	60.1 (50.0, 79.0)	0	0
																				PP		2601	50.89	13.97	13	121	60.1 (50.0, 79.0)	0	0
				Brazilian Admixed								Brazilian Admixed										Brazilian Admixed
Study Name	Cohort	Traits (mm Hg)		N	Mean	SD	Min	Max	Age Mean (Min; Max age)	% Men		N	Mean	SD	Min	Max	Age Mean (Min; Max age)	% Men		Traits (mm Hg)		N	Mean	SD	Min	Max	Age Mean (Min; Max age)	% Men	N5 observations winsorized
Baependi Heart Study	Baependi	SBP		594	121.42	14.59	79	198	43.2 (22.0; 80.0)	43.43		280	135.02	16.66	97	190	59.1 (25.0; 80.0)	31.79		SBP		874	130.6	20.3	79.0	205.0	48.3 (22.0; 80.0)	39.7	1
		DBP		594	75.33	9.56	51	113	43.2 (22.0; 80.0)	43.43		280	79.69	10.46	56	108	59.1 (25.0; 80.0)	31.79		DBP		874	79.9	11.9	51.0	118.0	48.3 (22.0; 80.0)	39.7	0
																				MAP		874	96.8	13.8	60.3	143.3	48.3 (22.0; 80.0)	39.7	0
																				PP		874	50.7	13.5	7.0	126.0	48.3 (22.0; 80.0)	39.7	0
1982 Pelotas Birth Cohort	Pelotas	SBP		3541	117.267	15.0033	72.5	213	22.7 (21.8; 23.7)	50.0706										SBP		3541	117.266	14.9933	72.5	207.287	22.7 (21.8; 23.7)	50.0706	1
		DBP		3541	73.3817	11.3378	38	131.5	22.7 (21.8; 23.7)	50.0706										DBP		3541	73.3817	11.3378	38	131.5	22.7 (21.8; 23.7)	50.0706	0
																				MAP		3541	88.0102	11.9571	50.8333	158.667	22.7 (21.8; 23.7)	50.0706	0
																				PP		3541	43.8856	8.93972	15	84.5	22.7 (21.8; 23.7)	50.0706	0
Abreviations: SBP, Systolic Blood Pressure (BP); DBP, Diastolic BP; MAP, Mean Arterial Pressure; PP, Pulse Pressure; N, Number of subjects; Mean, mean levels; SD, standard deviation of mean; Min, minimum value; Max, maximum value; For each BP trait (SBP, DBP, MAP, and PP), the extreme BP values were Winsorised if a BP value was greater than 6 SD, above or below the mean, setting the BP value exac…
