# Supplementary material for: Novel genetic associations for blood pressure identified via gene-alcohol interaction in up to 570K individuals across multiple ancestries
Source: PLoS One. 2018 Jun 18;13(6):e0198166. doi: 10.1371/journal.pone.0198166 (PMC6005576; doi:10.1371/journal.pone.0198166)
Supplement: S2 Table — Characteristics of blood pressure (BP) in light/heavy drinkers (1–7 drinks/week or ≥8 drinks/week), within sub-sample of individuals with or without anti-hypertensive (BP Lowering) medications, and in combined samples; SBP, systolic BP; DBP, diastolic BP; MAP, mean arterial pressure; PP, pulse pressure; N, number of individuals; mean, mean levels; SD, standard deviation of mean; Min, minimum value; Max, maximum value; For each BP trait (SBP, DBP, MAP, and PP), the extreme BP values were winsorised if a BP value was greater than 6 SD, above or below the mean, setting the BP value exactly at 6 SDs from the mean. (XLSX) [file pone.0198166.s022.xlsx]

## Sheet: S2 Table. Descriptives_BP_LHD
S2 Table. Descriptive analyses for discovery data (Stage 1) in light/heavy drinkers. Characteristics of blood pressure (BP) in light/heavy drinkers (1-7 drinks/week or ≥8 drinks/week), within sub-sample of individuals with or without anti-hypertensive (BP Lowering) medications, and in combined samples
				Subset sample Not taking BP lowering medications								Subset sample Taking any BP lowering medications										Combined data (not taking BP lowering medications and taking BP lowering medications), after correcting for medication use
				European Ancestry								European Ancestry										European Ancestry
Study Name	Cohort	Traits (mm Hg)		N	mean	SD	min	max	Age mean (min; max age)	% Men		N	mean	SD	min	max	Age mean (min; max age)	% Men		Traits (mm Hg)		N	mean	SD	min	max	Age mean (min; max age)	% Men	N observations winsorized
Age Gene/Environment Susceptibility Reykjavik Study	AGES	SBP		257	139	18.77	102	225	72.9 (66.0; 80.0)	55.25		415	144.4	19.27	96	210	73.5 (67.0; 80.0)	59.28		SBP		672	151.6	21.49	102	225	73.3 (66.0; 80.0)	57.74	0
		DBP		257	76.09	8.704	55	112	72.9 (66.0; 80.0)	55.25		415	76.33	10.14	30	120	73.5 (67.0; 80.0)	59.28		DBP		672	82.41	10.82	40	130	73.3 (66.0; 80.0)	57.74	0
																				MAP		672	69.2	17.57	25	134	73.3 (66.0; 80.0)	57.74	0
																				PP		672	105.5	12.79	72.33	149	73.3 (66.0; 80.0)	57.74	0
Atherosclerosis Risk In Communities Study	ARIC	SBP		5072	115.67	15.52	67	203	53.6 (44.0; 65.0)	49.39		1132	128.14	17.17	74	194	55.9 (45.0; 66.0)	54.16		SBP		6204	120.68	19.06	67	209	54.0 (44.0; 66.0)	50.33	0
		DBP		5072	70.99	9.55	40	130	53.6 (44.0; 65.0)	49.39		1132	76.64	9.85	43	116	55.9 (45.0; 66.0)	54.16		DBP		6204	73.84	11.34	40	130	54.0 (44.0; 66.0)	50.33	0
																				MAP		6204	89.46	13.08	53.67	154.33	54.0 (44.0; 66.0)	50.33	1
																				PP		6204	46.84	12.69	18	127.21	54.0 (44.0; 66.0)	50.33	1
Coronary Artery Risk Development in Young Adults	CARDIA	SBP		1513	109.074	10.7754	75	151	25.6 (18.0; 32.0)	46.66		11	121	10.5736	105	136	27.6 (24.0; 30.0)	63.6		SBP		1524	109.269	11.0092	75	151	25.6 (18.0; 32.0)	46.8	0
		DBP		1513	68.2267	8.96522	23	102	25.6 (18.0; 32.0)	46.7		11	82.0909	11.3794	60	103	27.6 (24.0; 30.0)			DBP		1524	68.399	9.20481	23	113	25.6 (18.0; 32.0)	46.8	0
																				MAP		1524	82.0222	8.91547	42.6667	125.667	25.6 (18.0; 32.0)	46.8	0
																				PP		1524	40.8698	8.84901	18	84	25.6 (18.0; 32.0)	46.8	0
Cardiovascular Health Study	CHS	SBP		1079	130.86	20.03	79	219	70.8 (65.0; 80.0)	43.2		534	139.69	21.68	90	208	71.5 (65.0; 80.0)	41.6		SBP		1613	138.75	23.44	79	223	71.0 (65.0; 80.0)	42.7	0
		DBP		1079	70.23	10.76	40	104	70.8 (65.0; 80.0)	43.2		534	72.7	11.86	40	116	71.5 (65.0; 80.0)	41.6		DBP		1613	74.36	12.59	40	126	71.0 (65.0; 80.0)	42.7	0
																				MAP		1613	95.82	14.59	58.33	147.33	71.0 (65.0; 80.0)	42.7	0
																				PP		1613	64.39	18.47	12	140	71.0 (65.0; 80.0)	42.7	0
CROATIA-Korcula	CROATIA-Korcula	SBP		134	122.69	10.26	98	144	50.2 (25.0;80.0)	37		151	165.26	16.72	126	215	60.0 (20.0;79.0)	50		SBP		285	145.25	25.5	98	215	55.4 (20.0;80.0)	44	1
		DBP		134	76.24	5.9	61	89	50.2 (25.0;80.0)	37		151	96.04	8.66	70	120	60.0 (20.0;79.0)	50		DBP		285	86.73	12.41	61	120	55.4 (20.0;80.0)	44	2
																				MAP		285	106.23	16.02	76.6667	146.667	55.4 (20.0;80.0)	44	2
																				PP		285	58.52	16.78	28	119	55.4 (20.0;80.0)	44	1
CROATIA-Vis	CROATIA-Vis	SBP		216	130.97	19.44	89.5	205	51.3 (19.0;80.0)	56		50	158.39	25.76	115	225	65.1 (46.0;80.0)	50		SBP		266	138.94	26.55	89.5	240	53.9(19.0;80.0)	56	2
		DBP		216	80.16	10.11	57.5	111	51.3 (19.0;80.0)	56		50	89.08	12.02	61	125	65.1 (46.0;80.0)	50		DBP		266	83.71	12.82	57.5	135	53.9(19.0;80.0)	56	1
																				MAP		266	102.12	16.41	70.8333	170	53.9(19.0;80.0)	56	1
																				PP		266	55.23	18.42	15	126	53.9(19.0;80.0)	56	1
Erasmus Rucphen Family Study	ERF	SBP		1169	138.172	17.8341	93	224.5	45.5 (18.1;78.0)	60.48		245	152.373	20.6686	110	222	58.0 (22.0;79.6)	70.2		SBP		1414	143.232	21.4222	93	237	47.7(18.1;79.6)	62.16	0
		DBP		1169	80.4106	9.88404	54.5	119.5	45.5 (18.1;78.0)	60.48		245	84.3184	10.1285	58	124	58.0 (22.0;79.6)	70.2		DBP		1414	82.8204	11.2337	54.5	134	47.7(18.1;79.6)	62.16	0
																				MAP		1414	102.957	13.7006	68.67	161.7	47.7(18.1;79.6)	62.16	0
																				PP		1414	60.4112	14.9092	28	131.5	47.7(18.1;79.6)	62.16	0
Family Heart Study	FamHS	SBP		987	114.639	15.2315	81.3	182.7	47.1 (25.6; 79.1)	56.84		245	125.131	18.9815	69.3	188	60.7 (28.3; 79.3)	61.22		SBP		1232	119.708	18.9962	81.3	203	49.8 (25.6; 79.3)	57.7	0
		DBP		987	69.2599	9.60804	37.3	106.7	47.1 (25.6; 79.1)	56.84		245	70.7367	10.1325	43.3	99.3	60.7 (28.3; 79.3)	61.22		DBP		1232	71.5422	10.7375	37.3	109.3	49.8 (25.6; 79.3)	57.7	0
																				MAP		1232	87.5976	12.3551	53.7667	137	49.8 (25.6; 79.3)	57.7	0
																				PP		1232	48.1662	14.1508	22	122.3	49.8 (25.6; 79.3)	57.7	0
Framingham Heart Study	FHS	SBP		5907	119.05	14.21	78	209	37.1(18.0;63.0)	49.4		257	148.72	18.44	113	214.62	46.2(28.0;69.0)	61.9		SBP		6164	120.29	15.58	78	214.62	37.5 (18.0; 69.0)	50	1
		DBP		5907	76.83	9.88	38	124	37.1(18.0;63.0)	49.4		257	95.4	11.31	67	133	46.2(28.0;69.0)	61.9		DBP		6164	77.61	10.61	38	133	37.5 (18.0; 69.0)	50	0
																				MAP		6164	42.68	9.57	19	101.13	37.5 (18.0; 69.0)	50	1
																				PP		6164	91.83	11.65	56	157.67	37.5 (18.0; 69.0)	50	0
Genetic Epidemiology Network of Arteriopathy	GENOA	SBP		215	128.73	17.4	89	195	50.5 (26.9; 75.4)	65.2		314	135.78	16.68	97	193	57.3 (35.2; 78.7)	59.6		SBP		529	141.82	20.13	89	208	54.6 (26.9; 78.7)	61.8	0
		DBP		215	79.21	9.75	57	106	50.5 (26.9; 75.4)	65.2		314	79.72	9.21	50	108	57.3 (35.2; 78.7)	59.6		DBP		529	85.45	10.75	57	118	54.6 (26.9; 78.7)	61.8	0
																				MAP		529	104.24	12.71	68	141	54.6 (26.9; 78.7)	61.8	0
																				PP		529	56.37	15.1	23	120	54.6 (26.9; 78.7)	61.8	0
Genetics of Lipid Lowering Drugs and Diet Network	GOLDN	SBP		326	112.6	14.21	71	154	45.6(18.0;77.8)	45.7		78	125.4	16.09	91	179	64.3(37.6;78.9)	61.5		SBP		404	117.95	18.26	71	194	49.2(18.0;78.9)	48.8	0
		DBP		326	67.87	8.86	44	95	45.6(18.0;77.8)	45.7		78	71.29	9.23	51	78.93	64.3(37.6;78.9)	61.5		DBP		404	70.46	10.38	44	99	49.2(18.0;78.9)	48.8	0
																				MAP		404	86.29	12.04	56.33	125.33	49.2(18.0;78.9)	48.8	0
																				PP		404	47.49	13.1	19	115	49.2(18.0;78.9)	48.8	0
Generation Scotland: Scottish Family Health Study	GS:SFHS	SBP		4869	132.55	17.4	81	216	51.7 (18.0;80.0)	40		1001	157.98	17.83	107	232	61.4 (34.0;80.0)	52		SBP		5870	136.89	19.92	81	232	53.3(18.0;80.0)	42	1
		DBP		4869	80.87	10.05	49	124	51.7 (18.0;80.0)	40		1001	93.24	10.04	57	126	61.4 (34.0;80.0)	52		DBP		5870	82.98	11.07	49	126	53.3(18.0;80.0)	42	1
																				MAP		5870	100.95	13.2	59.6667	152.667	53.3(18.0;80.0)	42	1
																				PP		5870	53.91	13.37	23	134	53.3(18.0;80.0)	42	1
Health, Aging and Body Composition	HABC	SBP		504	129.81	18.66	85	204	73.6 (69.0, 79.0)	56.55		461	136.43	21.53	85	218	73.7 (69.0, 80.0)	58.13		SBP		965	140.14	22.79	85	233	73.7 (69.0, 80.0)	57.31	0
		DBP		504	70.16	10.97	35	105	73.6 (69.0, 79.0)	56.55		461	71.39	11.08	30	106	73.7 (69.0, 80.0)	58.13		DBP		965	75.53	12.36	35	116	73.7 (69.0, 80.0)	57.31	0
																				MAP		965	97.06	14.43	55.33	151.67	73.7 (69.0, 80.0)	57.31	0
																				PP		965	64.61	17.36	26	142	73.7 (69.0, 80.0)	57.31	0
HERITAGE Family Study	HER	SBP		273	116.6	11.06	93	152	36.7 (18.0; 65.1)	53.8										SBP		273	116.6	11.06	93	152	36.7 (18.0; 65.1)	53.8	0
		DBP		273	66.3	8.18	45	96	36.7 (18.0; 65.1)	53.8										DBP		273	66.32	8.18	45	96	36.7 (18.0; 65.1)	53.8	0
																				MAP		273	83.07	8.35	64.6	114.3	36.7 (18.0; 65.1)	53.8	0
																				PP		273	50.26	8.39	31.2	81.5	36.7 (18.0; 65.1)	53.8	0
Gene-Lifestyle Interaction	Hypergen	SBP		213	115.056	14.156	79.5	165	39.5(18.0;72.0)	54.93		130	128.93	19.7	92	206	60.2 (37.0;80.0)	63.85		SBP		343	126	21.62	79.5	221	47.4(18.0,80.0)	58.31	0
		DBP		213	70.74	9.12	44.5	101	39.5(18.0;72.0)	54.93		130	72.05	10.26	50.5	101.5	60.2 (37.0;80.0)	63.85		DBP		343	75.03	11.02	44.5	111.5	47.4(18.0,80.0)	58.31	0
																				MAP		343	92.02	13.59	56.166	138.166	47.4(18.0,80.0)	58.3	0
																				PP		343	50.97	15.29	28.5	125	47.4(18.0,80.0)	58.3	0
The Multi-Ethnic Study of Atherosclerosis	MESA	SBP		1142	119.23	18.33	77	205.5	60.5 (45.0;80.0)	55.4		516	128.13	21.15	75	208.5	65.1 (45.0;80.0)	60.2		SBP		1658	126.66	22.2	77	223.5	61.9(45.0;80.0)	56.9	0
		DBP		1142	70.41	9.82	41	105	60.5 (45.0;80.0)	55.4		516	71.38	10.37	41	106.5	65.1 (45.0;80.0)	60.2		DBP		1658	73.82	11.21	41	116.5	61.9(45.0;80.0)	56.9	0
																				MAP		1658	91.43	13.72	56	147	61.9(45.0;80.0)	56.9	0
																				PP		1658	52.84	16.4	20.5	130	61.9(45.0;80.0)	56.9	0
Netherlands Epidemiology Obesity	NEO	SBP		3498	131.5	16.8	85	222	55.2(44.0;66.0)	50.2		1483	136.8	17.4	85	213	58.0 (45.0;66.0)	52.1		SBP		4981	137.5	19.3	84.7	228	56.0 (44.0;66.0)	50.7	0
		DBP		3498	84.5	10.2	45	145	55.2(44.0;66.0)	50.2		1483	86.8	10.4	54	143	58.0 (45.0;66.0)	52.1		DBP		4981	88.2	11.7	44.7	153.3	56.0 (44.0;66.0)	50.7	0
																				MAP		4981	104.6	13.6	59	178.3	56.0 (44.0;66.0)	50.7	0
																				PP		4981	49.4	11.6	18.3	147.7	56.0 (44.0;66.0)	50.7	0
Rotterdam study	RS1	SBP		1245	139.87	20.2811	89	234	69.5 (61.4;80.0)	50.8		711	147.652	21.8697	93	236	70.9(61.4;80.0)	55.6		SBP		1956	148.151	23.5707	89	251	70.0(61.4;80.0)	52.5	0
		DBP		1245	75.3518	10.4411	50	115	69.5 (61.4;80.0)	50.8		711	76.9845	12.0291	43	118	70.9(61.4;80.0)	55.6		DBP		1956	79.5803	12.3792	50	128	70.0(61.4;80.0)	52.5	1
																				MAP		1956	102.437	14.8199	65	161.3	70.0(61.4;80.0)	52.5	0
																				PP		1956	68.5708	17.4574	28	151	70.0(61.4;80.0)	52.5	0
Rotterdam study	RS2	SBP		990	139.34	19.1752	85	235	62.4(55.1;79.8)	53.13		352	148.548	21.7901	90	211	64.5(55.4;80.0)	54.26		SBP		1342	145.69	22.5595	85	235	63.0(55.1;80.0)	53.43	0
		DBP		990	78.5399	10.2651	47	122	62.4(55.1;79.8)	53.13		352	81.5938	11.3233	43.5	143	64.5(55.4;80.0)	54.26		DBP		1342	81.9639	12.0112	47	153	63.0(55.1;80.0)	53.43	0
																				MAP		1342	103.206	14.3409	64.33	176.7	63.0(55.1;80.0)	53.43	0
																				PP		1342	63.7262	16.4538	24	151	63.0(55.1;80.0)	53.43	0
Rotterdam study	RS3	SBP																		SBP
		DBP																		DBP
																				MAP
																				PP
Women's Genome Health Study	WGHS	SBP		11524	120.88	12.17	105	185	53.6 (45.0, 89.0)	0		1522	138.39	11.66	105	185	57.4 (45.0, 82.0)	0		SBP		13046	124.67	15.99	105	200	54.0 (45, 89)	0	0
		DBP		11524	75.31	8.51	60	110	53.6 (45.0, 89.0)	0		1522	85.13	7	60	110	57.4 (45.0, 82.0)	0		DBP		13046	77.62	10.5	60	120	54.0 (45, 89)	0	0
																				MAP		13046	93.3	11.67	75	140	54.0 (45, 89)	0	0
																				PP		13046	47.05	10.08	5	105	54.0 (45, 89)	0	0
Women's Health Initiative	GARNET	SBP		1810	126.96	16.69	85	193	64.7 (50.0,79.0)	0		661	138.24	18.17	101	196	66.5 (50.0,79.0)	0		SBP		2471	133.39	20.68	85	211	65.2 (50.0,79.0)	0	0
		DBP		1810	74.85	8.94	40	103	64.7 (50.0,79.0)	0		661	78.54	9.54	45	104	66.5 (50.0,79.0)	0		DBP		2471	78.51	10.94	40	114	65.2 (50.0,79.0)	0	0
																				MAP		2471	97.01	12.94	57.33	142.67	65.2 (50.0,79.0)	0	0
																				PP		2471	55.48	15.73	17	123	65.2 (50.0,79.0)	0	0
Women's Health Initiative	WHIMS	SBP		2662	126.76	16.71	81	193	67.5 (50.0,79.0)	0		831	139.04	17.04	92	191	69.2 (51.0,79.0)	0		SBP		3493	133.25	20.42	81	206	67.9 (50.0,79.0)	0	0
		DBP		2262	74.05	8.57	40	100	67.5 (50.0,79.0)	0		831	78	9.19	47	104	69.2 (51.0,79.0)	0		DBP		3493	77.37	10.55	40	114	67.9 (50.0,79.0)	0	0
																				MAP		3493	96	12.65	58.33	143	67.9 (50.0,79.0)	0	0
																				PP		3493	55.89	15.47	12	116	67.9 (50.0,79.0)	0	0
				African Ancestry								African Ancestry										African Ancestry
Study Name	Cohort	Traits (mm Hg)		N	mean	SD	min	max	Age mean (min; max age)	% Men		N	mean	SD	min	max	Age mean (min; max age)	% Men		Traits (mm Hg)		N	mean	SD	min	max	Age mean (min; max age)	% Men	N observations winsorized
Atherosclerosis Risk In Communities Study	ARIC	SBP		607	127.74	21.87	84	235	52.0 (44.0; 65.0)	62.27		297	132.62	20.72	87	214	52.9 (44.0; 65.0)	52.53		SBP		904	134.27	23.43	84	235	52.3 (44.0; 65.0)	59.07	0
		DBP		607	80.4	12.8	47	132	52.0 (44.0; 65.0)	62.27		297	84.15	12	52	126	52.9 (44.0; 65.0)	52.53		DBP		904	84.92	14.1	47	136	52.3 (44.0; 65.0)	59.07	1
																				MAP		904	101.37	16.14	59.33	159.33	52.3 (44.0; 65.0)	59.07	0
																				PP		904	49.35	15.73	18	121	52.3 (44.0; 65.0)	59.07	1
Coronary Artery Risk Development in Young Adults	CARDIA	SBP		759	111.306	10.5424	86	158	24.7 (18.0; 34.0)	40.1		10	124.6	12.9632	98	145	27.2 (23.0; 31.0)	10		SBP		769	111.674	11.0432	86	160	24.7 (18.0; 34.0)	39.7	0
		DBP		759	68.6614	9.68954	24	107	24.7 (18.0; 34.0)			10	82	12.8927	63	104	27.2 (23.0; 31.0)	10		DBP		769	68.9649	10.0803	24	114	24.7 (18.0; 34.0)	39.7	0
																				MAP		769	83.2013	9.3626	54.3333	129.333	24.7 (18.0; 34.0)	39.7	0
																				PP		769	42.7094	9.65949	20	91	24.7 (18.0; 34.0)	39.7	0
Cardiovascular Health Study	CHS	SBP		114	133.87	18.66	91.77	181.77	70.3 (65.0; 79.0)	60.5		158	142.73	23.13	84.77	209	71.1 (65.0; 80.0)	45.6		SBP		272	147.73	24.38	91.77	224	70.8 (65.0; 80.0)	51.8	0
		DBP		114	74.83	9.35	47.44	99.44	70.3 (65.0; 79.0)	60.5		158	76.98	12.17	52.44	109.44	71.1 (65.0; 80.0)	45.6		DBP		272	81.89	12.58	47.44	119.44	70.8 (65.0; 80.0)	51.8	0
																				MAP		272	103.84	14.85	66.22	145	70.8 (65.0; 80.0)	51.8	0
																				PP		272	65.84	19.32	29.33	158	70.8 (65.0; 80.0)	51.8	0
Family Heart Study	FamHS	SBP		73	129.973	21.6686	101	211	47.2 (33.0; 76.0)	53.42		87	130.816	21.4001	96	212	53.2 (30.0; 77.0)	51.72		SBP		160	138.588	22.8689	101	227	50.5 (30.0; 77.0)	52.5	0
		DBP		73	79.4288	13.6081	55.7	122.3	47.2 (33.0; 76.0)	53.42		87	78.8069	9.96723	55	110.7	53.2 (30.0; 77.0)	51.72		DBP		160	84.5281	12.6311	55.7	122.3	50.5 (30.0; 77.0)	52.5	0
																				MAP		160	102.548	15.1573	70.8	149.533	50.5 (30.0; 77.0)	52.5	0
																				PP		160	54.0594	15.1418	30.3	117.3	50.5 (30.0; 77.0)	52.5	0
GENOA	GENOA	SBP		76	132.97	22.76	98	201	49.7 (25.5; 68.9)	55.3		67	137.75	19.76	87	200	55.6 (34.5; 79.2)	61.2		SBP		143	142.23	23.52	98	215	52.5 (25.5; 79.2)	58	0
		DBP		76	81.71	13.24	53	113	49.7 (25.5; 68.9)	55.3		67	81.13	11.68	56	106	55.6 (34.5; 79.2)	61.2		DBP		143	86.13	13.35	53	116	52.5 (25.5; 79.2)	58	0
																				MAP		143	104.83	15.55	68	149	52.5 (25.5; 79.2)	58	0
																				PP		143	56.1	16.63	26	106	52.5 (25.5; 79.2)	58	0
Health, Aging and Body Composition	HABC	SBP		181	135.52	22.75	77	218	73.1 (69.0, 80.0)	65.19		251	140.18	22.37	80	217	73.1 (69.0, 80.0)	44.22		SBP		432	146.94	24.51	77	232	73.1 (69.0, 80.0)	53.01	0
		DBP		181	73.56	13.07	34	120	73.1 (69.0, 80.0)	65.19		251	74.29	12.5	30	106	73.1 (69.0, 80.0)	44.22		DBP		432	79.79	13.78	34	120	73.1 (69.0, 80.0)	53.01	0
																				MAP		432	102.18	15.54	60.33	150	73.1 (69.0, 80.0)	53.01	0
																				PP		432	67.15	19.61	16	141	73.1 (69.0, 80.0)	53.01	0
The Healthy Aging in Neighborhoods of Diversity across the Life Span (HANDLS) study	HANDLS	SBP		73	129.973	21.6686	101	211	47.2 (33.0; 76.0)	53.42		87	130.816	21.4001	96	212	53.2 (30.0; 77.0)	51.72		SBP		160	138.588	22.8689	101	227	50.5 (30.0; 77.0)	52.5	0
		DBP		73	79.4288	13.6081	55.7	122.3	47.2 (33.0; 76.0)	53.42		87	78.8069	9.96723	55	110.7	53.2 (30.0; 77.0)	51.72		DBP		160	84.5281	12.6311	55.7	122.3	50.5 (30.0; 77.0)	52.5	0
																				MAP		160	102.548	15.1573	70.8	149.533	50.5 (30.0; 77.0)	52.5	0
																				PP		160	54.0594	15.1418	30.3	117.3	50.5 (30.0; 77.0)	52.5	0
Howard University Family Study	HUFS	SBP		811	122.17	17.84	88	222.5	38.8 (18.0; 79.0)	44.3		213	138.93	22.07	80.5	219	52.7 (20.0; 78.0)	36.15		SBP		1024	128.71	22.77	88	234	41.7 (18.0; 79.0)	42.58	0
		DBP		811	78.11	12.25	46	156	38.8 (18.0; 79.0)	44.3		213	86.1	13.48	53	143.5	52.7 (20.0; 78.0)	36.15		DBP		1024	81.78	14.48	46	156	41.7 (18.0; 79.0)	42.58	0
																				MAP		1024	97.49	16.5	62.67	178.17	41.7 (18.0; 79.0)	42.58	0
																				PP		1024	46.93	13.55	13	105	41.7 (18.0; 79.0)	42.58	1
Gene-Lifestyle Interaction	Hypergen	SBP		213	125.06	19.38	97	195	34.7 (18.0;70.0)	55.87		167	132.446	23.98	82	197.5	48.4 (25.0;77.0)	47.9		SBP		380	134.9	24.2	97	212.5	40.7 (18.0,77.0)	52.37	0
		DBP		213	73.96	11.7	47.5	114	34.7 (18.0;70.0)	55.87		167	77.64	11.43	48.5	107.5	48.4 (25.0;77.0)	47.9		DBP		380	79.97	13.42	47.5	117.5	40.7 (18.0,77.0)	52.37	0
																				MAP		380	98.28	16.23	68.83	146.17	40.7 (18.0,77.0)	52.4	0
																				PP		380	54.93	15.26	27.5	121.5	40.7 (18.0,77.0)	52.4	0
Jackson Heart Study	JHS	SBP		636	120.2	16.32	73	200	43.4 (21.0; 80.0)	49.1		375	128.14	17.74	73	200	51.8 (25.0; 79.0)	42.7		SBP		1011	128.28	19.94	73	224	49.5 (21.0; 80.0)	47.2	0
		DBP		636	79.36	10.73	48	123	43.4 (21.0; 80.0)	49.1		375	81.37	10.47	48	123	51.8 (25.0; 79.0)	42.7		DBP		1011	83.65	12	48	123	49.5 (21.0; 80.0)	47.2	0
																				MAP		1011	98.53	13.59	56.33	146.67	49.5 (21.0; 80.0)	47.2	0
																				PP		1011	44.63	14.07	14	130	49.5 (21.0; 80.0)	47.2	0
The Multi-Ethnic Study of Atherosclerosis	MESA	SBP		451	125.15	19.87	80.5	191.5	58.8 (45.0;80.0)	62.08		425	136.65	22.17	86.5	230.5	64.1 (45.0;80.0)	57.88		SBP		876	138.01	24.84	80.5	245.5	61.3 (45.0;80.0)	60.05	0
		DBP		451	74.44	9.47	50.5	106	58.8 (45.0;80.0)	62.08		425	76.78	11.15	50.5	118.5	64.1 (45.0;80.0)	57.88		DBP		876	80.43	12.02	50.5	128.5	61.3 (45.0;80.0)	60.05	0
																				MAP		876	99.62	15.25	66.5	157.17	61.3 (45.0;80.0)	60.05	0
																				PP		876	57.58	17.67	21	154	61.3 (45.0;80.0)	60.05	0
Women's Health Initiative	WHI	SBP		2077	126.83	16.14	88	198	60.0 (50.0, 79.0)	0		1517	136.14	17.48	85	220	62.2 (50.0,79.0)	0		SBP		3594	137.09	20.59	88	235	60.9 (50.0,79.0)	0	0
		DBP		2077	77.06	8.87	46	110	60.0 (50.0, 79.0)	0		1517	79.89	9.47	42	115	62.2 (50.0,79.0)	0		DBP		3594	82.51	11.14	46	125	60.9 (50.0,79.0)	0	0
																				MAP		3594	100.71	13.12	60	159	60.9 (50.0,79.0)	0	0
																				PP		3594	54.58	15.28	17	129	60.9 (50.0,79.0)	0	0
				Asian Ancestry								Asian Ancestry										Asian Ancestry
Study Name	Cohort	Traits (mm Hg)		N	mean	SD	min	max	Age mean (min; max age)	% Men		N	mean	SD	min	max	Age mean (min; max age)	% Men		Traits (mm Hg)		N	mean	SD	min	max	Age mean (min; max age)	% Men	N observations winsorized
Genetic Epidemiology Network of Salt-Sensitivity	GenSalt	SBP		552	120.26	12.5	89.33	165.78	40.0 (18.0; 60.0)	95.11		1	125.3				55	100		SBP		553	120.3	12.52	89.33	165.78	40.0 (18.0; 60.0)	95.12	0
		DBP		552	76.23	9.73	47.33	109.33	40.0 (18.0; 60.0)	95.11		1	81.56				55	100		DBP		553	76.75	9.74	47.33	109.33	40.0 (18.0; 60.0)	95.12	0
																				MAP		553	91.27	9.84	61.78	126.22	40.0 (18.0; 60.0)	95.12	0
																				PP		553	43.55	9.17	23.56	76.67	40.0 (18.0; 60.0)	95.12	0
The Multi-Ethnic Study of Atherosclerosis	MESA	SBP		115	120.33	18.21	85.5	181.5	60.9(45.0;78.0)	78.2		41	135.8	22.21	97.5	193	68.7 (48.0;80.0)	90.2		SBP		156	128.34	23.5	85.5	208	62.9(45.0;80.0)	81.41	0
		DBP		115	73.22	10.42	45.5	109	60.9(45.0;78.0)	78.2		41	76.27	12.55	53	104	68.7 (48.0;80.0)	90.2		DBP		156	76.65	12.4	45.5	114	62.9(45.0;80.0)	81.41	0
																				MAP		156	93.88	15.32	60.5	137	62.9(45.0;80.0)	81.41	0
																				PP		156	51.7	15.29	26.5	106.5	62.9(45.0;80.0)	81.41	0
The Singapore Chinese Eye Study	SCES	SBP																		SBP
		DBP																		DBP
																				MAP
																				PP
Singapore Chinese Health Study cases	SCHS cases	SBP		91	146.56	23.0724	93.666	206.667	64.8 (51.8; 79.9)	83.5		52	143.346	15.4165	119.333	183.333	66.6 (51.3; 79.5)	84.2		SBP		143	148.119	22.5245	96.667	206.666	65.5 (51.3; 79.9)	83.2	0
		DBP		91	83.8315	13.1615	53.6667	130.667	64.8 (51.8; 79.9)	83.5		52	79.4551	6.24065	64	99.333	66.6 (51.3; 79.5)	84.2		DBP		143	83.7785	11.7763	53	130.33	65.5 (51.3; 79.9)	83.2	0
																				MAP		143	105.225	13.8084	71.556	154.778	65.5 (51.3; 79.9)	83.2	0
																				PP		143	64.3403	17.862	32	109.666	65.5 (51.3; 79.9)	83.2	0
Singapore Chinese Health Study controls	SCHS controls	SBP		222	138.338	21.6027	98	211.666	64.4 (50.0; 79.9)	86.9		70	141.238	14.9292	112.33	193.333	66.8 (54.7; 79.9)	88.5		SBP		292	140.163	21.4362	100	211.666	64.9 (50.0; 79.9)	87.3	0
		DBP		222	81.6712	11.2343	56	122.333	64.4 (50.0; 79.9)	86.9		70	80.6524	6.96285	58	99.333	66.8 (54.7; 79.9)	88.5		DBP		292	82.3516	11.0429	58	122.33	64.9 (50.0; 79.9)	87.3	0
																				MAP		292	101.622	13.3705	75.555	151.666	64.9 (50.0; 79.9)	87.3	0
																				PP		292	57.8116	15.8315	28	123.33	64.9 (50.0; 79.9)	87.3	0
The Singapore Malay Eye Study	SiMES	SBP																		SBP
		DBP																		DBP
																				MAP
																				PP
The Singapore Indian Eye Study	SINDI	SBP																		SBP
		DBP																		DBP
																				MAP
																				PP
The Singapore Prospective Cohort Study Program	SP2-1M	SBP		331	125.982	15.7817	90	180.5	45.2 (24.7; 78.7)	74.9		33	143.79	16.4858	115	183.5	53.8 (34.8; 74.6)	81.8		SBP		364	128.956	18.4214	90	198.5	46.0 (24.7; 78.7)	75.5	0
		DBP		331	77.8172	10.6001	54.5	119.5	45.2 (24.7; 78.7)	74.9		33	86.17	7.99967	70	98.5	53.8 (34.8; 74.6)	81.8		DBP		364	79.4808	11.6457	54.5	119.5	46.0 (24.7; 78.7)	75.5	0
																				MAP		364	95.9725	13.2402	68.6667	139.833	46.0 (24.7; 78.7)	75.5	0
																				PP		364	49.48	11.27	28	93	46.0 (24.7; 78.7)	75.5	0
The Singapore Prospective Cohort Study Program	SP2-610	SBP		258	123.81	18.7937	92	192.5	44.3 (23.2; 73.3)	37.2		23	144.46	19.07	104.5	190.5	56.6 (46.1; 69.9)	65.2		SBP		281	126.728	21.1803	92	205.5	45.3 (23.2; 73.3)	39.5	0
		DBP		258	74.593	10.3792	54.5	118	44.3 (23.2; 73.3)	37.2		23	83.7	11.11	65.5	111.5	56.6 (46.1; 69.9)	65.2		DBP		281	76.16	11.6663	54.5	121.5	45.3 (23.2; 73.3)	39.5	0
																				MAP		281	93.0136	14.1152	69	149.5	45.3 (23.2; 73.3)	39.5	0
																				PP		281	50.57	13.59	26	104	45.3 (23.2; 73.3)	39.5	0
				Hispanic Ancestry								Hispanic Ancestry										Hispanic Ancestry
Study Name	Cohort	Traits (mm Hg)		N	mean	SD	min	max	Age mean (min; max age)	% Men		N	mean	SD	min	max	Age mean (min; max age)	% Men		Traits (mm Hg)		N	mean	SD	min	max	Age mean (min; max age)	% Men	N observations winsorized
The Multi-Ethnic Study of Atherosclerosis	MESA	SBP		469	121.45	18.41	86	204	58.3(45.0;80.0)	75.48		210	136.58	22.42	80.5	202	64.5(45.0;80.0)	72.86		SBP		679	130.77	24.15	86	217	60.2(45.0;80.0)	74.67	0
		DBP		469	72.54	9.51	44.5	108.5	58.3(45.0;80.0)	75.48		210	75.66	10.99	52	107	64.5(45.0;80.0)	72.86		DBP		679	76.6	11.68	44.5	117	60.2(45.0;80.0)	74.67	0
																				MAP		679	94.65	14.75	61.67	149	60.2(45.0;80.0)	74.67	0
																				PP		679	54.17	17.48	26	129.5	60.2(45.0;80.0)	74.67	0
Women's Health Initiative	WHI	SBP		1442	121.68	15.72	84	187	59.3 (50.0, 78.0)	0		311	137.4	16.33	98	182	62.1 (50.0,78.0)	0		SBP		1753	127.13	19.71	84	197	59.8 (50.0, 78.0)	0	0
		DBP		1442	73.93	8.62	50	105	59.3 (50.0, 78.0)	0		311	80.17	9.04	57	112	62.1 (50.0,78.0)	0		DBP		1753	76.81	10.68	50	122	59.8 (50.0, 78.0)	0	0
																				MAP		1753	93.58	12.74	62	136.33	59.8 (50.0, 78.0)	0	0
																				PP		1753	50.32	13.94	13	121	59.8 (50.0, 78.0)	0	0
				European Ancestry								European Ancestry										European Ancestry
Study Name	Cohort	Traits (mm Hg)		N	mean	SD	min	max	Age mean (min; max age)	% Men		N	mean	SD	min	max	Age mean (min; max age)	% Men		Traits (mm Hg)		N	mean	SD	min	max	Age mean (min; max age)	% Men	N observations winsorized
Baependi Heart Study	Baependi	SBP																		SBP
		DBP																		DBP
																				MAP
																				PP
1982 Pelotas Birth Cohort	Pelotas	SBP		2380	118.064	14.9793	79	185.5	22.7 (21.8; 23.7)	55.8824										SBP		2380	118.064	14.9793	79	185.5	22.7 (21.8; 23.7)	55.8824	1
		DBP		2380	73.516	11.2848	38	118.5	22.7 (21.8; 23.7)	55.8824										DBP		2380	73.516	11.2848	38	118.5	22.7 (21.8; 23.7)	55.8824	0
																				MAP		2380	88.3655	11.8945	54.6667	140.833	22.7 (21.8; 23.7)	55.8824	0
																				PP		2380	44.5485	9.05294	18.5	84.5	22.7 (21.8; 23.7)	55.8824	0
Abreviations: SBP, Systolic Blood Pressure (BP); DBP, Diastolic BP; MAP, Mean Arterial Pressure; PP, Pulse Pressure; N, Number of subjects; Mean, mean levels; SD, standard deviation of mean; Min, minimum value; Max, maximum value; For each BP trait (SBP, DBP, MAP, and PP), the extreme BP values were Winsorised if a BP value was greater than 6 SD, above or below the mean, setting the BP value exac…
