# Supplementary material for: Novel genetic associations for blood pressure identified via gene-alcohol interaction in up to 570K individuals across multiple ancestries
Source: PLoS One. 2018 Jun 18;13(6):e0198166. doi: 10.1371/journal.pone.0198166 (PMC6005576; doi:10.1371/journal.pone.0198166)
Supplement: S3 Table — Characteristics of systolic BP and diastolic BP, after correcting for BP lowering medication and winsorizing observations. (XLSX) [file pone.0198166.s023.xlsx]

## Sheet: S3 Table. Descriptives_BP_Alc
S3 Table. Descriptive analyses for blood pressure (BP) stratified by alcohol consumption for discovery data (Stage 1) . Characteristics of systolic BP and diastolic BP,
after correcting for BP lowering medication and winsorizing observations
Studies	Traits (mm Hg)	European Ancestry
		Non-Drinkers				Current Drinkers				Light Drinkers (1-7 drinks/week )				Heavy Drinkers (≥8 drinks/week)
		N	Mean	SD		N	Mean	SD		N	Mean	SD		N	Mean	SD
AGES	SBP	757	150.1	21.21		1637	150.3	21.81		603	151.5	21.69		69	152.5	19.8
	DBP	757	80.17	10.67		1637	81	10.49		603	82.38	10.95		69	82.67	9.699
ARIC	SBP	3267	122.7	20.13		6204	120.68	19.06		4780	119.58	18.87		1424	124.38	19.24
	DBP	3267	73.14	11.55		6204	73.84	11.34		4780	73.31	11.25		1424	75.64	11.49
CARDIA	SBP	131	108.702	10.6941		1524	109.269	11.0092		1106	108.202	10.878		418	112.091	10.8675
	DBP	131	67.9542	9.31241		1524	68.399	9.20481		1106	67.9652	9.07238		418	69.5467	9.46182
CHS	SBP	1350	140.58	22.5		1613	138.75	23.44		1264	137.94	23.41		349	141.7	23.36
	DBP	1350	74.02	12.24		1613	74.36	12.59		1264	74	12.74		349	75.64	11.95
CROATIA-Korcula	SBP	173	143.344	27.7138		285	145.247	25.4954		270	144.763	25.6028		15	153.967	22.4726
	DBP	173	83.7399	11.83		285	86.7263	12.4087		270	86.4444	12.4815		15	91.8	10.0531
CROATIA-Vis	SBP	190	139.026	25.6193		266	138.94	26.5516		253	139.028	26.8144		13	137.231	21.5847
	DBP	190	82.5737	12.1036		266	83.7124	12.8246		253	83.6858	12.7414		13	84.2308	14.9173
ERF	SBP	895	146.072	25.2526		1877	141.853	21.6643		814	140.6	21.107		600	146.803	21.3468
	DBP	895	82.9268	11.6392		1877	82.2328	11.1212		814	81.3464	10.9525		600	84.82	11.3101
FamHS	SBP	1673	121.128	21.0145		1920	119.751	19.403		706	117.63	18.3274		526	122.498	19.531
	DBP	1673	70.6133	11.1665		1920	71.6603	10.8446		706	70.4456	10.6137		526	73.0141	10.7366
FHS	SBP	1429	120.59	16.23		6718	119.93	15.65		4116	118.54	14.97		2048	123.79	16.2
	DBP	1427	77.52	10.46		6717	77.41	10.65		4116	76.49	10.17		2048	79.84	11.13
GENOA	SBP	394	145.58	19.39		1035	141.47	19.82		420	140.86	20.48		109	145.5	18.35
	DBP	394	84.76	10.99		1035	85.06	10.85		420	84.84	10.96		109	87.8	9.62
GOLDN	SBP	411	118.7	19.09		404	117.95	18.26		388	117.81	18.29		16	121.25	17.87
	DBP	411	69.95	10.75		404	70.46	10.38		388	70.26	10.36		16	75.19	9.9
GS:SFHS	SBP	605	136.664	21.4191		5899	136.888	19.9264		5819	136.859	19.943		51	139.824	16.897
	DBP	605	81.7537	11.3835		5899	82.9773	11.0643		5819	82.9509	11.075		51	86.0392	10.3999
HABC	SBP	688	134.8	19.4		965	132.97	20.34		943	139.85	22.81		22	152.36	18.69
	DBP	688	68.95	10.84		965	70.75	11.03		943	75.42	12.35		22	80.27	12.1
HER	SBP	226	116.3	11.02		273	116.6	11.06		199	116.1	11.16		74	117.8	10.75
	DBP	226	66	8.52		273	66.32	8.18		199	66	8.1		74	67.23	8.39
HyperGen	SBP	902	133.01	23.45		343	126	21.62		249	123.39	20.37		94	132.92	23.36
	DBP	902	76.17	11.73		343	75.03	11.02		249	74.24	10.84		94	77.11	11.29
MESA	SBP	724	131.05	23.61		1850	125.96	22.18		1114	126.5	22.28		544	126.92	22.06
	DBP	724	72.76	11.07		1850	73.5	11.34		1114	72.95	11.16		544	75.56	11.11
NEO	SBP	752	137.1	19.6		4981	137.5	19.3		2594	135.6	19.2		2387	139.6	19.3
	DBP	752	88.4	11.3		4981	88.2	11.7		2594	87.4	11.6		2387	88.9	11.8
RS1	SBP	464	151.406	22.859		2433	148.425	23.5598		960	147.537	23.5893		996	148.742	23.5494
	DBP	464	79.8922	12.4663		2433	79.532	12.3997		960	79.1229	12.1926		996	80.0211	12.5468
RS2	SBP	303	150.822	24.8243		1700	145.51	22.7422		645	145.484	22.8477		697	145.881	22.3041
	DBP	303	82.8993	12.7421		1700	81.7697	12.0438		645	81.5372	11.7569		697	82.3587	12.2371
RS3	SBP	288	135.878	21.7401		2671	136.541	20.9484
	DBP	288	84.6389	11.8599		2671	85.2265	12.3739
WGHS	SBP	9976	126.78	16.96		13046	124.67	15.99		11540	124.47	15.93		1506	126.24	16.38
	DBP	9976	78.52	10.91		13046	77.62	10.5		11540	77.5	10.48		1506	78.54	10.61
WHI-GARNET	SBP	940	137.59	21.21		2471	133.99	20.68		2156	133.64	20.69		315	136.39	20.52
	DBP	940	79.62	11.32		2471	78.51	10.94		2156	78.33	10.9		315	79.8	11.14
WHI-WHIMS	SBP	956	136.18	20.94		3493	133.25	20.42		3008	133.36	20.56		485	132.59	19.5
	DBP	956	77.51	10.67		3493	77.37	10.55		3008	77.45	10.58		485	76.84	10.35
Studies	Traits (mm Hg)	African Ancestry
		Non-Drinkers				Current Drinkers				Light Drinkers (1-7 drinks/week )				Heavy Drinkers (≥8 drinks/week)
		N	Mean	SD		N	Mean	SD		N	Mean	SD		N	Mean	SD
ARIC	SBP	1963	134.92	23.53		904	134.27	23.43		647	132.52	22.51		257	138.7	25.11
	DBP	1963	83.61	13.45		904	84.92	14.1		647	83.75	14.12		257	87.85	13.65
CARDIA	SBP	179	110.763	11.3927		769	111.674	11.0432		639	111.059	10.7452		130	114.696	11.9975
	DBP	179	70.5978	9.49202		769	68.9649	10.0803		639	68.6197	9.80956		130	70.6615	11.2046
CHS	SBP	465	152.39	25.25		272	147.73	24.38		225	147.94	25.09		47	146.73	20.84
	DBP	464	81.38	12.05		272	81.89	12.58		225	81.81	13.06		47	82.27	10.11
FamHS	SBP	345	142.81	28.54		272	138.99	23.64		78	137.231	21.2358		82	139.878	24.3814
	DBP	345	81.11	13.06		272	83.52	12.41		78	83.6731	12.3441		82	85.3415	12.9211
GENOA	SBP	608	145.92	25.57		376	139.47	23.01		120	143.07	23.78		23	137.87	22.08
	DBP	608	83.76	13.37		376	84.19	13.3		120	86.17	13.28		23	85.91	14.03
HABC	SBP	702	139.08	21.83		432	138.23	22.62		416	147.06	24.34		16	143.94	29.34
	DBP	702	73.14	12.33		432	73.98	12.73		416	79.69	13.82		16	82.62	12.86
HANDLS	SBP	663	127.179	20.476		220	130.202	21.5953
	DBP	663	77	13.2444		220	77.82	12.653
HUFS	SBP	658	132.55	25.43		1024	128.71	22.77		980	128.62	22.93		44	130.86	19.08
	DBP	658	83.17	14.63		1024	81.78	14.48		980	81.78	14.59		44	81.68	11.75
HyperGen	SBP	860	139.76	24.75		380	134.9	24.202		258	131.6	22.8		122	141.86	25.67
	DBP	860	80.04	12.85		380	79.97	13.418		258	77.7	12.66		122	84.77	13.75
JHS	SBP	963	134.19	21.5		1125	128.35	19.88		864	128	19.99		147	129.92	19.67
	DBP	963	85.29	11.68		1125	83.61	11.94		864	83.44	11.91		147	84.91	12.45
MESA	SBP	826	141.22	24.6		825	136	24.28		648	137.26	25.02		228	140.12	24.23
	DBP	826	79.68	11.77		825	79.23	11.72		648	79.72	12.14		228	82.44	11.47
WHI	SBP	2992	140.68	21.48		3594	137.09	20.59		3364	137.09	20.63		230	137.05	19.96
	DBP	2992	83.03	11.43		3594	82.51	11.14		3364	82.51	11.15		230	82.52	10.95
Studies	Traits (mm Hg)	Asian Ancestry
		Non-Drinkers				Current Drinkers				Light Drinkers (1-7 drinks/week )				Heavy Drinkers (≥8 drinks/week)
		N	Mean	SD		N	Mean	SD		N	Mean	SD		N	Mean	SD
GenSalt	SBP	1282	115.96	14.73		553	120.3	12.52		338	119.33	11.95		215	121.83	13.25
	DBP	1282	72.91	10.21		553	76.75	9.74		338	75.76	9.39		215	78.3	10.09
MESA	SBP	517	128.27	24.92		228	127.62	23.35		140	128.65	23.47		16	125.69	24.35
	DBP	517	74.38	12.2		228	75.86	11.86		140	76.66	12.34		16	76.56	13.31
SCES	SBP	1627	143.071	21.5914		223	142.904	20.473
	DBP	1627	82.932	10.6294		223	85.188	10.9945
SCHS Cases	SBP	531	149.614	23.969		143	148.119	22.5245		115	147.812	23.0274		28	149.381	20.672
	DBP	531	83.0189	11.6842		143	83.7785	11.7763		115	83.3507	11.8389		28	85.5357	11.5585
SCHS Controls	SBP	926	139.993	21.6096		292	140.163	21.4362		234	139.65	22.1122		58	142.236	18.4869
	DBP	926	80.0479	10.2502		292	82.3516	11.0429		234	81.7536	10.6608		58	84.7644	12.2715
SiMES	SBP	2492	151.549	25.4647		35	135.357	22.1507
	DBP	2492	82.403	11.9283		35	79.8	10.7527
SINDI	SBP	2170	140.963	22.7719		321	140.249	20.444
	DBP	2170	80.5873	11.0419		321	84.685	10.8181
SP2-1M	SBP	156	130.497	20.0675		364	128.956	18.4214		158	129.62	20.826		206	128.447	16.374
	DBP	156	79.407	12.8551		364	79.481	11.6457		158	78.991	12.914		206	79.857	10.588
SP2-610	SBP	223	127.773	22.7783		282	126.651	21.1821		156	125.641	20.096		125	128.084	22.468
	DBP	223	74.787	11.2911		282	76.135	11.6513		156	75.029	11.156		125	77.564	12.172
Studies	Traits (mm Hg)	Hispanic Ancestry
		Non-Drinkers				Current Drinkers				Light Drinkers (1-7 drinks/week )				Heavy Drinkers (≥8 drinks/week)
		N	Mean	SD		N	Mean	SD		N	Mean	SD		N	Mean	SD
MESA	SBP	763	133.15	26.17		692	129.06	23.1		462	131.49	24.58		217	129.22	23.19
	DBP	763	74	11.66		692	75.78	11.64		462	76.16	11.35		217	77.52	12.34
WHI	SBP	848	129.27	19.34		1753	127.13	19.71		1643	127.24	19.89		110	125.49	16.74
	DBP	848	77.21	10.82		1753	76.81	10.68		1643	76.79	10.73		110	77.11	9.94
Studies	Traits (mm Hg)	Brazilian Admixed
		Non-Drinkers				Current Drinkers				Light Drinkers (1-7 drinks/week )				Heavy Drinkers (≥8 drinks/week)
		N	Mean	SD		N	Mean	SD		N	Mean	SD		N	Mean	SD
Baependi	SBP	615	131.67	20.82		259	128.05	18.73
	DBP	615	80.2	11.98		259	79.29	11.75
Pelotas	SBP	1161	115.628	14.895		2380	118.064	14.9793		2343	117.972	14.9704		37	123.919	14.5633
	DBP	1161	73.1064	11.4457		2380	73.516	11.2848		2343	73.4831	11.2687		37	75.5946	12.2508
Abreviations: Traits, SBP: Systolic Blood Pressure (BP); DBP: Diastolic BP; N, Number of subjects; Mean, mean levels; SD, standard deviation of mean. For each BP trait (SBP, DBP, MAP, and PP), the extreme BP values were Winsorised if a BP value was greater than 6 SD, above or below the mean, setting the BP value exactly at 6 SDs from the mean.
