# Supplementary material for: Novel genetic associations for blood pressure identified via gene-alcohol interaction in up to 570K individuals across multiple ancestries
Source: PLoS One. 2018 Jun 18;13(6):e0198166. doi: 10.1371/journal.pone.0198166 (PMC6005576; doi:10.1371/journal.pone.0198166)
Supplement: S4 Table — Study design, population-based or cohort-unrelated; Principal components used; Other covariates entered in the model; Genotyping platforms; Genotyping calling algorithm; Quality Control Filters; Imputation reference panel; Number of SNVs (single nucleotide variants). (XLSX) [file pone.0198166.s024.xlsx]

## Sheet:  S4 Table. Pheno & Genotype
S4 Table. Characteristics of each study and their genotype data for discovery data (Stage 1)
European Ancestry
Study Name	Cohort	Study design	Principal Components (PC)	Other Covariates	Genotyping platforms	Genotyping calling algorithm	Quality Control Filters	Imputation software	Imputation: reference panel	Number of SNVs
Age Gene/Environment Susceptibility Reykjavik Study	AGES	Population-Based	1-2	None	Illumina Hu370CNV	BeadStudio	Call rate < 97%; pHWE<1e-6; sex mismatch; previous genotype mismatch	MaCH/minimac	1000HG Cosmopolitan panel (including all races—version 2010-11 data freeze, 2012-03-04 haplotypes)	30062006
Atherosclerosis Risk In Communities Study	ARIC	Cohort-Unrelated	1 - 10	Field centers	Affymetrix Genome-Wide Human SNP Array 6.0	Birdseed calling algorithm	Missing call rate > 95%, MAF >=2%, HWEp >=1e-5	IMPUTE2	1000G Phase I [2010-11] - European panel (CEU, TSI, GBR, FIN, IBS)	9347320
Coronary Artery Risk Development in Young Adults	CARDIA	Cohort-Unrelated	First 2	Field center (3 indicator variables)	Affymetrix 6.0 array	BEAGLECALL	Sample call rate >=98%, Missing call rate >=95%, MAF >=2%, HWEp >=1e-4	BEAGLE version 3.3.2	1000G Phase I [2010-11] - European panel (CEU, TSI, GBR, FIN, IBS)	7544843
Cardiovascular Health Study	CHS	Cohort-Unrelated	0	Field Center	Illumina 370 CNV BeadChip System merged with ITMAT-Broad-CARe (IBC) Illumina iSELECT chip	Illumina BeadStudio	Excluded: 1)individuals with baseline CHD, CHF, PAD, valvular heart disease, stroke or TIA. 2) Individuals with call rate <=95 or who had genotype discordant with known sex or prior genotyping. 3) SNPs with call rate < 97%; pHWE<1e-5; >2 duplicate errors or Mendelian inconsistencies, heterozygote frequency=0. 4) After imputation, SNPs were excluded for variance on the allele dosage <=0.01	minimac (release stamp 2012-11-16)	1000 Genomes, multiple ethnicities from Phase 1 version 3 haplotypes.	38050714
CROATIA-Korcula	CROATIA-Korcula	Isolate, unrelated individuals (relateds excluded for this study)	1-3		Illumina HumanHap 370 CNV Duochip	GenomeStudio	Call rate 98%, HWE p-value 1e-6	Impute2	1000G v3 (Mar12)	39192174
CROATIA-Vis	CROATIA-Vis	Isolate, unrelated individuals (relateds excluded for this study)	1-3		Illlumina Infinium HumanHap 300 Bead chip	GenomeStudio	Call rate 98%, HWE p-value 1e-6	Impute2	1000G v3 (Mar12)	39191980
Erasmus Rucphen Family Study	ERF	Family-Based	0	none	Illumina 6k, Illumina 318K, Affymetrix 250K, Illumina 350K, Illumina 610K	Bead Studio	Call rate < 95%; pHWE<1e-6; MAF < 0.01; Samples with call rate <90%, autosomal heterozigosity (FDR 1%), identity-by-state >95% or sex mismatch	MaCH 1.0.18.c	1000 Genomes phase1 v3	29974334
Family Heart Study	FamHS	Family-Based	1	Field centers, Genotype chip	Illumina HumMap 550K, Human 610 Quadv1, or Human 1M-Duov3	Beadstudio-Gencall v3.0	Call rate < 98%; pHWE<1e-6; Mendelian errors; Exclude Duplicate and MZ samples, sex mismatch	MaCH (version 1.0.16)	1000HG Cosmopolitan panel (including all races—version 2010-11 data freeze, 2012-03-04 haplotypes)	36545314
Framingham Heart Study	FHS	Family-Based	PC1-PC10	IDtype (identify different generations)	Affymetrix Nsp, Sty and 50K gene centric	BRLMM	SNPs with ≤ 0.5 % MAF were excluded; SNPs with P value < 1E-6 were excluded; SNPs with a callrate ≤ 97% were excluded	MACH/minimac	1000G reference panel (Sanger version)	8993554
Genetic Epidemiology Network of Arteriopathy	GENOA	Family-Based	1	none	Affymetrix 6.0 & Illumina 1M-Duo Bead Chip	Birdseed and Genome Studio	Sample Call rate < 95%; SNPs with call rate >= 5%; Identical twins; sex mismatch; outliers (±6 SDs) on first 10 PCs	IMPUTE2	1,000 Genomes project Phase I integrated variant set release (v3) in NCBI build 37 (hg19) coordinates (released in March 2012)	9307564
Genetics of Lipid Lowering Drugs and Network	GOLDN	Family-Based	0	NA	Affymetrix 6 chip	birdseed	Call rate < 96%; pHWE<1e-6; MAF<1%;Mendelian errors;	MACH software/library for pre-phasing and the second stage uses Minimac version1 for imputation	1000G PhaseI v3 Shapeit2 Reference (2010-11 data freeze, 2013-09 haplotypes). ALL reference panel - no monomorphic sites	9003514
Generation Scotland: Scottish Family Health Study (GS:SFHS)	GS:SFHS	This is a family-based study but sample was reduced to removed all relationships closer than second cousins therefore, for the purposes of this study, participants are unrelated	1-4		Illumina HumanOmniPlusExome	GenomeStudio	Call rate 98%, HWE p-value 1e-6	Impute2	1000G v3 (Mar12)	39321347
Health, Aging and Body Composition	HABC	Cohort-Unrelated	1	Field centers	Illumina Human 1M-Duov3	Beadstudio-Gencall v3.0	Call rate < 98%; pHWE<1e-6; Mendelian errors; Exclude Duplicate samples, sex mismatch	MaCH (version 1.0.16)	1000HG Cosmopolitan panel (including all races—version 2010-11 data freeze, 2012-03-04 haplotypes)	9267303
HERITAGE Family Study	HER	Family-Based	1	NA	Illumina 370CNV	Illumina GenomeStudio	Call rate < 98%; pHWE<1e-6; Mendelian errors;	MACH for pre-phasing, Minimac for imputation	1000G Phase I Integrated Release Version 3 Haplotypes (including all races—version 2010-11 data freeze, 2012-03-14 haplotypes)	9139018
Gene-Lifestyle Interaction	HyperGen	Family-Based	0	age,sex,FC1,FC2	Affy 5.0	BRLMM	No previous filtering; filtered on MAF<1% and Rsq<.1 for these analyses	MaCH and minimac used for 1000G imputation; ProbABEL used for analysis	1000G Phase 1 Integrated Release Vesrion 3 Haplotypes (2010-11 data freeze, 2012-03-14 haplotypes) on 1,092 individuals of all ethnic backgrounds and excludes monomorphic and singleton sites	8883887
The Multi-Ethnic Study of Atherosclerosis	MESA	Cohort-Unrelated	First two PC	age,gender,sites	Affymetrix 6.0	Birdseed v1.33	Call rate < 98%; pHWE<1e-6; Mendelian errors; Exclude Duplicate and MZ samples, sex mismatch	IMPUTE2	1000HG Cosmopolitan panel (including all races—version 2010-11 data freeze, 2012-03-04 haplotypes)	36545314
Netherlands Epidemiology Obesity	NEO	Cohort-Unrelated	first 4	None	Illumina HumanCoreExome-24v1_A Beadchip	GenCall	Sample call rate > 98%; SNP Call rate >98%;	IMPUTE2	1000 Genomes. Version 2011 v3	7877671
Rotterdam study	RS1	Cohort-Unrelated	1	none	Illumina 550 (+duo), Illumina 610 quad	Beadstudio-Gencall	Call rate < 98%; pHWE<1e-6; MAF < 0.001; Samples with call rate <97.5%, excess autosomal heterozigosity >0.336, identity-by-state >97% or sex mismatch	MaCH 1.0	1000 Genomes phase I version 3	29079120
Rotterdam study	RS2	Cohort-Unrelated	1	none	Illumina 550 duo	Beadstudio-Gencall	Call rate < 98%; pHWE<1e-6; MAF < 0.001; Samples with call rate <97.5%, excess autosomal heterozigosity >0.336, identity-by-state >97% or sex mismatch	MaCH 1.0	1000 Genomes phase I version 3	28805690
Rotterdam study	RS3	Cohort-Unrelated	1	none	Illumina 610 quad	Beadstudio-Gencall	Call rate < 98%; pHWE<1e-6; MAF < 0.001; Samples with call rate <97.5%, excess autosomal heterozigosity >0.336, identity-by-state >97% or sex mismatch	MaCH 1.0	1000 Genomes phase I version 3	28779887
Women's Genome Health Study	WGHS	Cohort-Unrelated	1,2,5	none	Illumina HumanMap 300 DuoPlus	Illumina BeadStudio 3.3	Call rate 90% SNPs, 98% samples; pHWE<1e-6; MAF 1%	MaCH (version 1.0.16) and Minimac (release 5/2/2012)	1000G phase I v.3 release (March 2012)	9064804
Women's Health Initiative	WHI	Cohort-Unrelated	1-10	Field centers	HumanOmniExpressExome-8v1_B (WHIMS), Illumina HumanOmni1-Quad v1-0 B (GARNET)	Beadstudio-Gencall v3.0	Call rate < 95%; concordance rate<98%; pHWE<1e-6; Exclude SNPs located on chromosome Y and Affymetrix QC probes	MaCH (version 1.0.16)	1000HG Cosmopolitan panel (version 3, March 2012 release)	9220415
African Ancestry
Study Name	Cohort	Study design	Principal Components (PC)	Other Covariates	Genotyping platforms	Genotyping calling algorithm	Quality Control Filters	Imputation software	Imputation: reference panel	Number of SNVs
Atherosclerosis Risk In Communities Study	ARIC	Cohort-Unrelated	1 - 10	Field centers	Affymetrix Genome-Wide Human SNP Array 6.0	Birdseed calling algorithm	Missing call rate > 95%, MAF > 0.01, HWEp >=1e-5	IMPUTE2	1000G Phase I Version 3 [March 2012], all ethnicities reference panel	15898763
Coronary Artery Risk Development in Young Adults	CARDIA	Cohort-Unrelated	First 4	Field center (3 indicator variables)	Affymetrix 6.0 array	Birdseed v1.33	DNA concordance, Sample call rate >95%, SNP call rate >=90%, MAF >=1%, sample heterozygosity, IBD analysis to identify outliers	minimac version 2013.7.17	1000G Phase I Version 3 [March 2012], all ethnicities reference panel	15562229
Cardiovascular Health Study	CHS	Cohort-Unrelated	1	Field Center	Illumina HumanOmni1-Quad_v1 BeadChip system	Illumina GenomeStudio	Excluded: 1) Individuals with call rate <=95% or who had genotype discordant with known sex or prior genotyping. 2) SNPs with call rate <97%, HWE P<10-5, >1 duplicate error or Mendelian inconsistency, heterozygote frequency = 0. 3) Variants with insufficient effective minor alleles (set at 5 effective alleles where effective alleles = MAF*sampleN*2*impQuality)	IMPUTE version 2.2.2	1000 Genomes, Phase 1 version 3, data freeze from 23 Nov 2010, phased haplotypes released March 2012	14191388
Family Heart Study	FamHS	Family-Based	1 - 10	none	Illumina Human 1M-Duov3	Beadstudio-Gencall v3.0	Call rate <99%; pHWE<1e-6; Mendelian errors; Duplicate and MZ samples, sex mismatch	MaCH (version 1.0.16)	1000HG Cosmopolitan panel (including all races—version 2010-11 data freeze, 2012-03-04 haplotypes)	15708711
GENOA	GENOA	Family-Based	1	none	Affymetrix 6.0 & Illumina 1M-Duo Bead Chip	Birdseed and Genome Studio	Call rate <99%; pHWE<1e-6; Mendelian errors; Duplicate and MZ samples, sex mismatch	IMPUTE2	1,000 Genomes project Phase I integrated variant set release (v3) in NCBI build 37 (hg19) coordinates (released in March 2012)	15847216
Health, Aging and Body Composition	HABC	Cohort-Unrelated	1	Field centers	Illumina Human 1M-Duov3	Beadstudio-Gencall v3.0	Call rate <99%; pHWE<1e-6; Mendelian errors; Duplicate samples, sex mismatch	MaCH (version 1.0.16)	1000HG Cosmopolitan panel (including all races—version 2010-11 data freeze, 2012-03-04 haplotypes)	15684373
The Healthy Aging in Neighborhoods of Diversity across the Life Span (HANDLS) study. Reference: PMID: 20828101	HANDLS	Cohort-Unrelated	first 10 principal components	age, sex	A combination of Illumina genotyping platforms to the equivalent of Illumina 1M SNP coverage	Illumina GenomeStudio	Exclude if call rate <= 95%, < -6 SD or > +6 SD from mean heterozygosity rate, sex mismatch, cryptic relatedness, discordance between self-reported ancestry and ancestry confirmed by analysis of genotyped SNPs. Additionally, post-imputation filters were applied to variants as per the analysis plan, i.e. a variant is excluded if MACH/minimac imputation quality measure R2 < 0.1 OR ProbABEL’s Mean_p…	MACH/minimac - http://csg.sph.umich.edu/abecasis/mach/index.html	1000 Genomes Project multi-ethnic panel phase 1 alpha freeze version 3, March 14, 2012	15668483
Howard University Family Study	HUFS	Family-Based	1		Affymetrix Genome-Wide Human SNP Array 6.0	Birdseed, v2	Call rate < 95%; HWE p <1e-3	MACH-Admix	1000G Cosmopolitan Panel	15328125
Gene-Lifestyle Interaction	HyperGen	Family-Based	1	age,sex,FC1,PC1	Affy 6.0	Birdseed	No previous filtering; filtered on MAF<1% and Rsq<.1 for these analyses	MaCH and minimac used for 1000G imputation; ProbABEL used for analysis	1000G Phase 1 Integrated Release Vesrion 3 Haplotypes (2010-11 data freeze, 2012-03-14 haplotypes) on 1,092 individuals of all ethnic backgrounds and excludes monomorphic and singleton sites	15608940
Jackson Heart Study	JHS	Cohort-Unrelated	1 - 10	none	Affymetrix 6.0	Birdseed2	Call rate <99%; pHWE<1e-6; Mendelian errors	MaCH (version 1.0.16)	1000HG Cosmopolitan panel (including all races—version 2010-11 data freeze, 2012-03-04 haplotypes)	38M
The Multi-Ethnic Study of Atherosclerosis	MESA	Cohort-Unrelated	First two PC	age,gender,sites	Affymetrix 6.0	Birdseed v1.33	Call rate < 98%; pHWE<1e-6; Mendelian errors; Exclude Duplicate and MZ samples, sex mismatch	IMPUTE2	1000HG Cosmopolitan panel (including all races—version 2010-11 data freeze, 2012-03-04 haplotypes)	36545314
Women's Health Initiative	WHI	Cohort-Unrelated	1-10	Field centers	Affymetrix 6.0	Beadstudio-Gencall v3.0	Call rate < 95%; concordance rate<98%; pHWE<1e-6; Exclude SNPs located on chromosome Y and Affymetrix QC probes	MaCH (version 1.0.16)	1000HG Cosmopolitan panel (version 3, March 2012 release)	36545314
Asian Ancestry
Study Name	Cohort	Study design	Principal Components (PC)	Other Covariates	Genotyping platforms	Genotyping calling algorithm	Quality Control Filters	Imputation software	Imputation: reference panel	Number of SNVs
Genetic Epidemiology Network of Salt-Sensitivity Study	GenSalt	Family-Based	0	Field centers	Affymatrix 6.0		Call rate < 75%; pHWE<1e-6; Mendelian errors; Exclude Duplicate and MZ samples, sex mismatch	MiniMach	1000HG Cosmopolitan panel (including all races—version 2010-11 data freeze, 2012-03-04 haplotypes)	7908179
The Multi-Ethnic Study of Atherosclerosis	MESA	Cohort-Unrelated	First two PC	age,gender,sites	Affymetrix 6.0	Birdseed v1.33	Call rate < 98%; pHWE<1e-6; Mendelian errors; Exclude Duplicate and MZ samples, sex mismatch	IMPUTE2	1000HG Cosmopolitan panel (including all races—version 2010-11 data freeze, 2012-03-04 haplotypes)	36545314
The Singapore Chinese Eye Study	SCES	Cohort-Unrelated	-	none	Illumina610k chip	Beadstudio (Illumina)	Call rate <99%; pHWE<1e-6; MAF<1%; Duplicates; Sex mismatch; Evidence for relatedness	Minimac	1000HG Cosmopolitan panel (including all races—March 2012 v3)	8123839
Singapore Chinese Health Study Myocardial Infarction Cases	SCHS cases	Case-Control	1, 2, 3	none	Illumina Illumina Omni Zhonghua-8	Beadstudio-Gencall v3.0	Call rate < 98%; Extremes in heterozygozity (< or > 3 SD); Exclude duplicate and MZ samples, 1st degree relatives; sex mismatch; PCA outliers	IMPUTE (version 2)	HapMap phase II+III East-Asian panels	1952464
Singapore Chinese Health Study Myocardial Infarction Controls	SCHS controls	Case-Control	1, 2, 3	none	Illumina Illumina Omni Zhonghua-8	Beadstudio-Gencall v3.0	Call rate < 98%; Extremes in heterozygozity (< or > 3 SD); Exclude duplicate and MZ samples, 1st degree relatives; sex mismatch; PCA outliers	IMPUTE (version 2)	HapMap phase II+III East-Asian panels	1930399
The Singapore Malay Eye Study	SiMES	Cohort-Unrelated	1-2	none	Illumina610k chip	Beadstudio (Illumina)	Call rate <99%; pHWE<1e-6; MAF<1%; Duplicates; Sex mismatch; Evidence for relatedness	Minimac	1000HG Cosmopolitan panel (including all races—March 2012 v3)	8630082
The Singapore Indian Eye Study	SINDI	Cohort-Unrelated	1-3	none	Illumina610k chip	Beadstudio (Illumina)	Call rate <99%; pHWE<1e-6; MAF<1%; Duplicates; Sex mismatch; Evidence for relatedness	Minimac	1000HG Cosmopolitan panel (including all races—March 2012 v3)	9490668
The Singapore Prospective Cohort Study Program	SP2-1M	Cohort-Unrelated	0	none	Illumina1M	Beadstudio (Illumina)	Call rate <99%; pHWE<1e-6; MAF<1%; Duplicates; Sex mismatch; Evidence for relatedness	Minimac	1000HG Cosmopolitan panel (including all races—March 2012 v3)	8177132
The Singapore Prospective Cohort Study Program	SP2-610	Cohort-Unrelated	0	none	Illumina610k chip	Beadstudio (Illumina)	Call rate <99%; pHWE<1e-6; MAF<1%; Duplicates; Sex mismatch; Evidence for relatedness	Minimac	1000HG Cosmopolitan panel (including all races—March 2012 v3)	8125222
Hispanic Ancestry
Study Name	Cohort	Study design	Principal Components (PC)	Other Covariates	Genotyping platforms	Genotyping calling algorithm	Quality Control Filters	Imputation software	Imputation: reference panel	Number of SNVs
The Multi-Ethnic Study of Atherosclerosis	MESA	Cohort-Unrelated	First two PC	age,gender,sites	Affymetrix 6.0	Birdseed v1.33	Call rate < 98%; pHWE<1e-6; Mendelian errors; Exclude Duplicate and MZ samples, sex mismatch	IMPUTE2	1000HG Cosmopolitan panel (including all races—version 2010-11 data freeze, 2012-03-04 haplotypes)	36545314
Women's Health Initiative	WHI	Cohort-Unrelated	1-10	Field centers	Affymetrix 6.0	Beadstudio-Gencall v3.0	Call rate < 95%; concordance rate<98%; pHWE<1e-6; Exclude SNPs located on chromosome Y and Affymetrix QC probes	MaCH (version 1.0.16)	1000HG Cosmopolitan panel (version 3, March 2012 release)	10350030
Brazilian Admixed
Study Name	Cohort	Study design	Principal Components (PC)	Other Covariates	Genotyping platforms	Genotyping calling algorithm	Quality Control Filters	Imputation software	Imputation: reference panel	Number of SNVs
Baependi Heart Study	Baependi	Family-Based	1, 4, and 7	none	Genome-wide SNP Human Array 6.0 (Affymetrix 6.0)	Birdseed	Call rate < 99%; genotype missing > 0.10; maf < 0.01; pHWE<1e-4; missing genotype per person > 0.10; sex mismatch	SHAPEIT and IMPUTE2	1000 Genomes	8603556
1982 Pelotas Birth Cohort	Pelotas	Cohort-Unrelated	1, 2, 5 and 10	none	Illumina HumanOmni 2.5-8v1	Genome Studio	Call rate <95%; pHWE < 1e-7; monomorphic; sex mismatches; extreme heterozygosity; individual missingness >3%; cryptic relatedness	IMPUTE2 (version 2.3.0)	1000HG Cosmopolitan panel (including all races—Dec 9, 2013 haplotypes)	11477299
Study design, population-based or cohort-unrelated; Principal components used; Other covariates entered in the model; Genotyping platforms; Genotyping calling algorithm; Quality Control Filters; Imputation reference panel; Number of SNVs (single nucleotide variants)
