# Supplementary material for: Novel genetic associations for blood pressure identified via gene-alcohol interaction in up to 570K individuals across multiple ancestries
Source: PLoS One. 2018 Jun 18;13(6):e0198166. doi: 10.1371/journal.pone.0198166 (PMC6005576; doi:10.1371/journal.pone.0198166)
Supplement: S5 Table — Characteristics of blood pressure (BP) within current drinkers (CURD: yes or no), and in alcohol combined samples; SBP, systolic BP; DBP, diastolic BP; MAP, mean arterial pressure; PP, pulse pressure; N, number of individuals; mean, mean levels; SD, standard deviation of mean; Min, minimum value; Max, maximum value. (XLSX) [file pone.0198166.s025.xlsx]

## Sheet: S5 Table. Descriptives_BP_CURD
S5 Table. Descriptive analyses for replication data (Stage 2) in current drinkers. Characteristics of blood pressure (BP) within current drinkers, and in alcohol combined samples
European Ancestry
Study Name	Cohort Name	Traits	CURD=0 (No)							CURD=1 (Yes)							All subjects with CURD
			N	Mean	SD	Median	Min.	Max.		N	Mean	SD	Median	Min.	Max.		N	Mean	SD	Median	Min.	Max.
Anglo-Scandinavian Cardiac Outcomes Trial	ASCOT-SC	SBP	568	177.3	17.8	174	139.5	264		1854	174.3	16.32	172	123.5	251		2422	175	16.72	172.5	123.5	264
		DBP	568	101.6	9.78	101.2	75.5	129		1854	104	9.97	103.5	67.5	145		2422	103.4	9.98	103	67.5	145
		MAP	568	126.8	10.27	125	104.3	172		1854	127.4	10.06	126	97.17	166.2		2422	127.3	10.11	125.7	97.17	172
		PP	568	75.68	16.95	69.5	29.5	129.5		1854	70.35	15.57	69.5	29.5	129.5		2422	71.6	16.05	70.5	29.5	148.5
Anglo-Scandinavian Cardiac Outcomes Trial	ASCOT-UK	SBP	847	176.3	18.65	172	127	261		2923	175.1	16.97	171.5	134	266.5		3770	175.4	17.36	172	127	266.5
		DBP	847	100.3	10.15	100.5	74	142.5		2923	102	9.77	101.5	69	146		3770	101.6	9.88	101.5	69	146
		MAP	847	125.6	10.73	124.2	104	172.5		2923	126.3	10.3	124.5	99.67	185.8		3770	126.2	10.4	124.5	104	172.5
		PP	847	75.99	17.7	73.5	25	156		2923	73.14	15.53	71.5	25.5	139.5		3770	73.78	16.08	72	25	156
British Genetics of Hypertension	BRIGHT	SBP	542	168.1	23.42	165	116	275		1280	167.6	20.5	165	102	264		1822	167.8	21.41	165	102	275
		DBP	542	102.5	11.54	101	72	147		1280	103.4	10.79	103	66	143		1822	103.1	11.03	102	66	147
		MAP	542	124.3	14.22	123.3	88.67	189.7		1280	124.8	12.82	123.7	78	174.7		1822	124.7	13.25	123.7	78	189.7
		PP	542	65.6	17.66	62	32	128		1280	64.21	15.49	62	27	134		1822	64.62	16.17	62	27	134
Cohorte Lausannoise Study	CoLaus	SBP	1462	130.93	21.2	126.83	86	229		3946	132.07	20.08	129	87.33	229.67		5408	131.76	20.39	128.33	86	229.67
		DBP	1462	80.73	12.06	79.67	49.67	139.67		3946	81.29	12.04	80	49	131		5408	81.14	12.05	80	49	139.67
		MAP	1462	97.46	14.29	95.56	64	166		3946	98.214	13.97	96.44	63.78	158.22		5408	98.01	14.06	96.22	63.78	166
		PP	1462	50.21	13.84	47.33	17	122		3946	50.78	12.71	48.33	22.67	128.06		5408	50.63	13.03	48	17	128.06
Data from an Epidemiological Study on the Insulin Resistance - Type 2 diabetes controls	DESIR	SBP	209	128.636	13.3318	130	100	177.5		487	129.528	13.4484	130	100	185		696	129.26	13.4102	130	100	185
		DBP	209	77.8206	7.3129	80	60	107.5		487	79.1006	8.583	80	60	120		696	78.7162	8.23798	80	60	120
		MAP	209	94.7592	8.57904	94.1667	76.6667	129.167		487	95.9097	9.49636	95	75	138.333		696	95.5642	9.23944	95	75	138.333
		PP	209	50.8158	9.7899	50	25	80		487	50.4271	9.29945	50	25	80		696	50.5438	9.444	50	25	80
Diabetes Heart Study	DHS	SBP	764	150.397	21.4332	149.25	69.5	275		176	146.236	19.6911	144	108.5	220		940	149.618	21.1703	148	69.5	275
		DBP	764	80.002	10.705	80	37	114		176	80.3864	11.2963	80	56.5	115		940	80.0739	10.813	80	37	115
		MAP	764	103.467	12.5767	103.3	47.83	165.7		176	102.336	12.7456	102.8	76.17	150		940	103.256	12.6094	103.3	47.83	165.7
		PP	764	70.3953	17.9202	68	29	164		176	65.8494	15.2764	64	33	105.5		940	69.5441	17.5381	67.5	29	164
Dose-Responses to Exercise Training	DR's EXTRA	SBP	173	155.237	22.7209	154	113	241		1057	154.161	22.2303	153	98	245		1230	154.322	22.2937	153	98	245
		DBP	173	86.04	9.657	86	60	118		1057	87.82	10.815	87	60	124		1230	87.57	10.674	87	60	124
		MAP	173	109.106	12.6212	109.333	81.33	152.33		1057	109.933	13.2019	109.667	75.33	163.67		1230	109.817	13.1199	109.5	75.33	163.67
		PP	173	69.1965	18.366	68	33	133		1057	66.3411	17.5464	65	21	139		1230	66.7427	17.6842	65	21	139
Estonian Genome Center - University of Tartu (Estonian Biobank)	EGCUT-OmniExpress	SBP	1268	138.074	22.4257	135	90	235		4611	131.781	21.5052	130	80	248		5879	133.3	21.9321	130	80	248
		DBP	1268	84.336	12.8184	82	50	150		4611	81.3904	13.2142	80	40	149		5879	82.11	13.1714	80	40	150
		MAP	1268	102.249	15.0296	100	63.3333	178.333		4611	98.1862	15.1437	96.6667	57.3333	182		5879	99.18	15.221	96.67	57.33	182.00
		PP	1268	53.7382	15.1919	50	20	126		4611	50.3908	13.6123	50	20	125		5879	51.21	14.1148	50	20	126
Estonian Genome Center - University of Tartu (Estonian Biobank)	EGCUT-CoreExome	SBP	739	125.18	21.3633	120	80	219		4138	122.595	18.7056	120	80	250		4877	123	19.162	120	80	250
		DBP	739	77.6779	12.738	76	45	120		4138	76.168	11.7765	75	45	150		4877	76.42	11.9468	75	40	150
		MAP	739	93.5119	14.8836	90.33	53.33	151		4138	91.6437	13.3409	90	58.33	183.33		4877	91.95	13.6103	90	53.33	183.3
		PP	739	47.502	13.21	45	20	114		4138	46.4273	11.8318	45	20	115		4877	46.59	12.057	45	20	115
Estonian Genome Center - University of Tartu (Estonian Biobank)	EGCUT-Human370CNV	SBP	365	131.52	21.3421	127	90	213		1463	127.524	20.651	122	88	245		1828	128.5	20.8267	124	88	245
		DBP	365	81.1507	13.3273	80	50	130		1463	79.8161	12.8641	80	42	130		1828	80.15	12.95	80	42	130
		MAP	365	97.9406	15.0149	95	63.33	151.66		1463	95.7186	14.6675	93.33	58.66	168.33		1828	96.27	14.7328	93.33	58.67	168.33
		PP	365	50.3699	14.1977	50	20	110		1463	47.7075	12.9629	45	20	115		1828	48.36	13.3038	46	20	115
European Prospective Investigation into Cancer and Nutrition	EPIC	SBP	2682	141.806	21.166	140	89.5	235.5		17846	137.423	19.8691	135	88	231.5		20528	137.995	20.0971	135.5	88	235.5
		DBP	2682	85.6855	12.7379	84.5	51	147.5		17846	84.096	12.096	83	46.5	189		20528	84.3037	12.1932	83	46.5	189
		MAP	2682	104.392	15.0816	103.333	63.8333	176.833		17846	101.871	14.199	100.333	61	199.667		20528	102.201	14.3422	100.833	61	199.667
		PP	2682	56.121	11.6279	55	17	102		17846	53.3264	11.1291	51.5	20	110		20528	53.6915	11.2348	52	17	110
The Fenland Study	Fenland-GWAS	SBP	78	125.58	17.49	122.17	94.67	201		1272	123.09	16.61	121	84.67	189.33		1350	123.23	16.66	121	84.67	201
		DBP	78	76.99	10.19	76.33	57.33	113.67		1272	75.75	10.94	74.67	42.33	124		1350	75.82	10.9	74.67	42.33	124
		MAP	78	93.19	12.05	93.72	72	142.78		1272	91.53	12.31	90.22	59.78	143		1350	91.62	12.3	90.33	59.78	143
		PP	78	48.59	10.79	46.17	31.33	87.33		1272	47.34	9.54	46.33	24.33	98		1350	47.41	9.61	46.33	24.33	98
The Fenland Study	Fenland-OMICS	SBP	624	123.561	16.4965	122	84.6667	182.667		7902	124.332	16.6858	122	79	214		8526	124.276	16.6723	122	79	214
		DBP	624	75.0945	10.5786	74.3333	47.6667	109.667		7902	75.3414	10.9236	74.3333	44	119		8526	75.3234	10.8983	74.3333	44	119
		MAP	624	91.2499	11.9358	90.2222	61.7778	131		7902	91.6718	12.294	90.3333	59.3333	142		8526	91.6409	12.2679	90.3333	59.3333	142
		PP	624	48.4661	10.1408	46.6667	27.6667	91.3333		7902	48.9911	9.77033	47.6667	23.6667	108		8526	48.9527	9.79826	47.6667	23.6667	108
Finland-United States Investigation of NIDDM Genetics	FUSION CASE	SBP	229	162.472	24.5531	161	96	252		484	161.136	25.1933	158	93.5	240		713	161.565	24.98	160	93.5	252
		DBP	229	88.4585	10.9118	88	56	120		484	91.9091	13.364	92	39	139.5		713	90.8008	12.7233	90	39	139.5
		MAP	229	113.13	13.6414	112	75.3333	150.333		484	114.985	15.654	115	71.6667	164		713	114.389	15.0524	114	71.6667	164
		PP	229	74.0131	20.5934	73	25	162		484	69.2273	19.6245	68	23	130		713	70.7644	20.0514	69	23	162
Finland-United States Investigation of NIDDM Genetics	FUSION CONTROL	SBP	58	152.491	26.612	153.5	110	220		200	147.792	21.7048	146	107	205		258	148.849	22.9285	147	107	220
		DBP	58	88.0172	12.2449	87.5	67	124		200	85.95	11.6839	86	58	122		258	86.4147	11.8198	86	58	124
		MAP	58	109.509	15.7721	109.667	83.3333	148		200	106.564	13.6937	105.75	75	148		258	107.226	14.2087	106.5	75	148
		PP	58	64.4741	19.8164	65.5	31	116		200	61.8425	16.5031	59	28	118		258	62.4341	17.2972	60.5	28	118
Genetic Studies of Atherosclerosis Risk	GeneSTAR	SBP	225	131.131	21.5406	128	86.5	201		518	127.265	17.5498	125	91	195		743	128.436	18.9165	125.5	86.5	201
		DBP	225	78.6426	10.3119	78.5	55	112.5		518	79.2286	9.81014	79	53.5	115		743	79.0511	9.96141	78.75	53.5	115
		MAP	225	96.1389	12.9125	95.6667	65.5	139		518	95.2408	11.4915	94.25	67	135.333		743	95.5128	11.938	94.6667	65.5	139
		PP	225	52.4889	16.2696	49.5	28.5	111		518	48.0367	12.5086	46	22.5	103.5		743	49.3849	13.8968	47	22.5	111
Genetics of Lobular Carcinoma In Situ in Europe	GLACIER	SBP	498	133.874	21.3566	130	80	208		5464	129.72	19.7631	125	80	235		5962	130.067	19.9323	126	80	235
		DBP	501	82.0186	13.574	80	45	155.433		5519	81.5062	14.0146	80	40	155.433		6020	81.5488	13.9781	80	40	155.433
		MAP	498	99.0087	14.583	97.3333	62.6667	145.667		5462	97.0732	13.7851	95	60	171.333		5960	97.2349	13.8626	95	60	171.333
		PP	501	52.7774	14.9101	50	15	132.493		5519	49.8294	15.0699	47	10	132.493		6020	50.0748	15.0775	48	10	132.493
Genetic Regulation of Arterial Pressure of Humans in the Community	GRAPHIC	SBP	149	134.262	19.3224	133	93	178		860	135.201	20.6138	132.5	92.5	224		1009	135.062	20.4217	132.5	92.5	224
		DBP	149	84.1745	12.1065	82	58	121.5		860	84.7546	11.8048	83.25	53	139.5		1009	84.669	11.8455	83	53	139.5
		MAP	149	100.87	13.5593	99.3333	70.3333	140.333		860	101.57	14.1175	99.8333	68.1667	167.667		1009	101.467	14.0321	99.8333	68.1667	167.667
		PP	149	50.0872	13.1295	50	23	84.5		860	50.4465	12.5931	49	18	108.5		1009	50.3935	12.6677	49	18	108.5
Health & Retirement Study	HRS	SBP	3433	136.04	21.8715	134.5	77.5	226		4945	135.067	21.7094	133.5	77.5	214.5		8378	135.466	21.7799	134	77.5	226
		DBP	3433	83.3469	12.152	82.5	46	141.5		4945	84.3361	12.3498	83.5	46.5	137.5		8378	83.9308	12.2781	83.5	46	141.5
		MAP	3433	100.911	14.5179	100.167	60.1667	166.167		4945	101.246	14.6534	100.667	59.5	158.833		8378	101.109	14.5981	100.5	59.5	166.167
		PP	3433	52.693	14.5633	51	18.5	120		4945	50.731	14.0801	49	17.5	115.5		8378	51.535	14.3118	50	17.5	120
Italian National Genome Initiative	INGI-CARL	SBP	268	131.6	24.06	127.0	90.0	205.0		168	135.1	21.51	130.0	80.0	200.0		436	133	23.12	130	80	205
		DBP	268	80.61	12.2	80	55	114		168	82.59	11.28	80	58	112		436	81.39	11.87	80	55	114
		MAP	268	97.6	15.51	95	67	141		168	100.1	13.88	97.67	65.33	141.3		436	98.59	14.92	96	65.33	141.3
		PP	268	51.0	15.24	48.0	25.0	105.0		168	52.5	14.44	50.0	22.0	103.0		436	51.59	14.93	50	22	105
Italian National Genome Initiative	INGI-FVG	SBP	334	134.5	21.16	130.0	95.0	195.0		645	139.7	23.02	136.0	85.0	215.0		979	137.9	22.5	135.0	85.0	215.0
		DBP	334	84.91	11.39	83	60	120		645	87.14	12.16	85	45	150		979	86.39	11.9	85	45	150
		MAP	334	101.4	13.5	99.17	71.67	136.7		645	104.7	14.58	102.2	71.67	151.7		979	103.6	14.3	101.3	71.67	151.7
		PP	334	49.58	15.51	49.5	15	112		645	52.63	16.68	50	15	110		979	51.6	16.35	50.0	15.0	112.0
T2DM study nested within EPIC	InterAct-CoreExome CASES	SBP	427	148.064	23.6729	147	94	227.5		3576	149.294	23.1639	147	82	275		4003	149.163	23.2188	147	82	275
		DBP	427	89.8454	13.3965	89	60	130		3576	90.3392	12.7635	90	40	162.799		4003	90.2865	12.8317	90	40	162.799
		MAP	427	109.252	15.7064	107.5	75	158.667		3576	109.992	15.1727	108.333	56.6667	179.333		4003	109.913	15.2302	108.333	56.6667	179.333
		PP	427	58.219	16.3981	56	26	113.5		3576	58.9489	16.0583	57	6.5	144.652		4003	58.871	16.0943	57	6.5	144.652
T2DM study nested within EPIC	InterAct-CoreExome SUBCOHORT	SBP	649	135.295	23.0223	131	84	227.5		5786	135.231	21.8224	132	82	245		6435	135.237	21.9445	132	82	245
		DBP	649	82.7442	12.2348	81	51.5	128		5786	83.201	12.1791	81.25	48	142.5		6435	83.1549	12.1845	81	48	142.5
		MAP	649	100.261	14.8305	98.3333	62.3333	152.333		5786	100.544	14.5344	98.6667	62	169		6435	100.516	14.5636	98.6667	62	169
		PP	649	52.5508	15.949	50	14	140		5786	52.0295	14.4461	50	12	135		6435	52.0821	14.6042	50	12	140
T2DM study nested within EPIC	InterAct-GWAS CASES	SBP	493	147.332	24.4591	144	90	243		2318	145.87	22.3605	142.75	79	255		2811	146.126	22.7448	143	79	255
		DBP	493	89.7759	12.4789	90	54	130		2317	89.8097	12.6417	90	46.5	140		2810	89.8037	12.6111	90	46.5	140
		MAP	493	108.961	15.4759	107.5	71.3333	166		2317	108.496	14.8917	106.667	58.3333	168.333		2810	108.578	14.994	106.833	58.3333	168.333
		PP	493	57.5558	16.9346	56	19	121		2317	56.0488	15.1617	54	19	144.652		2810	56.3132	15.4948	54	19	144.652
T2DM study nested within EPIC	InterAct-GWAS SUBCOHORT	SBP	442	135.595	22.144	131	90	207		2764	132.946	21.2273	130	80	230		3206	133.311	21.372	130	80	230
		DBP	442	83.5023	12.0661	81.5	57.5	128		2763	82.8306	12.1484	81	49.5	162.799		3205	82.9232	12.1374	81	49.5	162.799
		MAP	442	100.867	14.6249	98.5833	70	148.333		2763	99.544	14.3397	97.6667	60	195.773		3205	99.7264	14.3843	97.6667	60	195.773
		PP	442	52.0928	14.4849	50	18.5	108		2763	50.1139	14.0253	48	8	144.652		3205	50.3868	14.1038	48.5	8	144.652
Cooperative Health Research in the Augsburg Region	KORA S3	SBP	971	130.29	21.4933	126	93	227		2123	132.274	19.7041	130	85	219		3094	131.651	20.3	129	85	227
		DBP	971	80.2111	12.5817	79	48	139		2123	81.7419	12.0294	81	45	132		3094	81.2615	12.224	80	45	139
		MAP	971	96.9042	14.6813	95	65.6667	166.333		2123	98.5858	13.5732	97.3333	64.3333	161		3094	98.0581	13.9499	96.6667	64.3333	166.333
		PP	971	50.0793	14.0681	48	22	112		2123	50.5318	13.6914	48	19	123		3094	50.3898	13.8101	48	19	123
Cooperative Health Research in the Augsburg Region	KORA S4	SBP	1023	129.378	22.818	126	82	216		2740	131.426	21.0498	128.5	77	232		3763	130.87	21.5611	128	77	232
		DBP	1023	81.2238	11.7088	79.5	56.5	126.5		2740	82.3272	11.5698	81	49.5	143		3763	82.0272	11.6166	80.5	49.5	143
		MAP	1023	97.2753	14.6921	95.3333	66.5	151		2740	98.6936	14.0091	96.8333	58.6667	171.333		3763	98.308	14.2101	96.6667	58.6667	171.333
		PP	1023	48.1544	14.8637	45.5	16	112.5		2740	49.0991	13.5305	46.75	19.5	114		3763	48.8423	13.9099	46.5	16	114
Lothian Birth Cohort	LBC1921	SBP	125	175.47	29.28	174	100	259		387	173.34	28.04	173	81	253		512	173.86	28.33	173	81	259
		DBP	125	86.77	15.02	85	54	131		387	86.41	14.04	85	43	133		512	86.5	14.27	85	43	133
		MAP	125	116.34	18	115.67	79.67	166.67		387	115.39	17.13	115	67.67	172		512	115.62	17.34	115	67.67	172
		PP	125	88.7	22.47	87	20	160		387	86.93	21.2	86	20	151		512	87.36	21.51	87	20	160
Lothian Birth Cohort	LBC1936	SBP	193	155.5	20.9	153.67	104	217.67		802	155.29	20.66	154	100	220.67		995	155.33	20.7	154	100	220.67
		DBP	193	84.53	11.41	84	58.33	118.33		802	85.34	11.27	85	54	126.33		995	85.18	11.3	85	54	126.33
		MAP	193	108.19	13.31	106.22	77.56	149.11		802	108.65	13.26	108.39	69.33	156		995	108.56	13.27	108	69.33	156
		PP	193	70.98	15.76	70	34	120		802	69.96	15.17	68.33	29	130		995	70.15	15.28	68.67	29	130
Lifelines Cohort Study	LifeLines	SBP	4304	128.301	17.4589	126	86	231		8772	131.505	17.3724	130	89	234		13076	130.45	17.4653	128	86	234
		DBP	4304	75.599	9.964	74	35	123		8772	77.364	10.1084	76	43	137.519		13076	76.783	10.0949	76	35	137.519
		MAP	4304	93.1662	11.5727	91.3333	59	155.667		8772	95.4106	11.6632	94	63	165.219		13076	94.6718	11.6808	93	59	165.219
		PP	4304	52.7017	12.3446	51	22	117		8772	54.1392	12.1126	53	24	124		13076	53.666	12.2077	52	22	124
Long Life Family Study	LLFS	SBP	1235	132.921	21.8712	130	76	254		1906	134.27	21.4651	132	85	254		3141	133.739	21.6323	131	76	254
		DBP	1235	81.0316	11.1982	81	52	117		1906	83.1868	11.7548	82.5	47	132		3141	82.3394	11.5853	82	47	132
		MAP	1235	98.3279	13.6899	97	62.6667	152		1906	100.214	14.0966	99.6667	63.6667	169.333		3141	99.4727	13.9664	98.6667	62.6667	169.333
		PP	1235	51.8891	15.823	49	19	153		1906	51.0829	14.5409	49	21	133		3141	51.3999	15.0607	49	19	153
London Life Sciences Prospective Population Study	LOLIPOP-EW610	SBP	244	136.07	21.5425	134	90	196		683	136.293	20.6211	134	87	221		927	136.234	20.856	134	87	221
		DBP	244	81.918	11.3279	81	57	115		683	83.4583	11.2491	82	56	121		927	83.0529	11.2842	82	56	121
		MAP	244	100	14.0999	99	70	141		683	101.078	13.6653	100	66	149		927	100.794	13.7815	99	66	149
		PP	244	54.1516	13.7436	52	24	98		683	52.8346	13.3298	51	22	108		927	53.1812	13.445	51	22	108
London Life Sciences Prospective Population Study	LOLIPOP-EWA	SBP	148	136.649	21.9172	134	96	199		434	141.369	22.0614	139	91	224		582	140.168	22.1019	138	91	224
		DBP	148	82.9257	12.1751	82	58	118		434	85.212	12.253	85	57	126		582	84.6306	12.2633	84	57	126
		MAP	148	100.838	14.5275	99	71	135		434	103.933	14.6777	103	71	154		582	103.146	14.6892	102	71	154
		PP	148	53.723	14.714	51	28	105		434	56.1567	14.5192	53.5	25	119		582	55.5378	14.5948	53	25	119
London Life Sciences Prospective Population Study	LOLIPOP-EWP	SBP	132	142.508	22.7802	140	99	197		512	141.486	21.918	139	93	222		644	141.696	22.0833	139	93	222
		DBP	132	85.3258	12.3397	86	54	112		512	85.1035	12.3272	85	55	132		644	85.1491	12.3205	85	54	132
		MAP	132	104.371	14.9923	104	69	140		512	103.897	14.8653	103	70	151		644	103.994	14.881	103	69	151
		PP	132	57.1818	14.9864	53	26	100		512	56.3828	13.5144	54	29	110		644	56.5466	13.8205	54	26	110
Metabolic Syndrome In Men	METSIM	SBP	1901	144.158	20.1947	142.667	89.3333	225.667		6607	144.187	19.7051	142	98	251		8508	144.18	19.8143	142.333	89.3333	251
		DBP	1901	90.0093	11.0509	89.3333	59.3333	125.333		6607	91.727	11.1635	90.6667	56	132.667		8508	91.3432	11.1608	90.6667	56	132.667
		MAP	1901	108.059	12.9964	107.556	72	151		6607	109.214	13.0946	108.222	70.6667	163.222		8508	108.956	13.0808	108	70.6667	163.222
		PP	1901	54.1483	14.7655	52	20.6667	124.333		6607	52.4598	13.5904	50.3333	19.3333	131.667		8508	52.8371	13.8786	50.6667	19.3333	131.667
Netherlands Study of Depression and Anxiety	NESDA	SBP	405	135.737	18.1855	133.5	73.5	212		2134	136.376	20.1549	132.25	65.5	222.5		2539	136.274	19.8519	132.5	65.5	222.5
		DBP	405	81.6926	10.8774	80.5	42.5	122.5		2134	81.8008	11.3683	80.5	35.5	124		2539	81.7836	11.2894	80.5	35.5	124
		MAP	405	99.7074	12.5538	97.8333	52.8333	151.333		2134	99.9927	13.5332	97.6667	45.5	154.167		2539	99.9472	13.3798	97.8333	45.5	154.167
		PP	405	54.0444	11.909	53.5	31	95.5		2134	54.574	13.1422	52.5	25	121		2539	54.4896	12.9526	52.5	25	121
Prevention of Renal and Vascular Endstage Disease	PREVEND	SBP	855	133.29	23.3248	129	90	219		2772	130.241	21.2188	126	85	227		3627	130.959	21.7688	127	85	227
		DBP	855	75.9474	11.3474	75	47	131		2772	75.2157	10.9339	74	48	117		3627	75.3882	11.0355	74	47	131
		MAP	855	95.0616	14.5076	93	64.3333	155.667		2772	93.5574	13.6966	91.3333	63.3333	150.333		3627	93.912	13.9047	91.6667	63.3333	155.667
		PP	855	57.3427	15.9764	54	28	123		2772	55.0249	13.7773	53	24	123		3627	55.5713	14.3576	53	24	123
French obese cases	OBA	SBP	260	143.087	21.8283	140	90	215		408	144.341	22.7287	140	100	255		668	143.823	22.3481	140	90	255
		DBP	260	82.625	14.879	80	40	130		408	83.7997	16.2724	80	40	179.7		668	83.3149	15.7079	80	40	179.7
		MAP	260	102.779	16.2815	101.667	56.6667	151.667		408	103.987	17.5874	101.667	63.3333	206.765		668	103.488	17.0545	101.667	56.6667	206.765
		PP	260	60.4615	13.6374	60	15	105		408	60.4392	13.5465	60	30	115		668	60.4484	13.5706	60	15	115
Precocious Coronary Artery Disease	PROCARDIS-cases	SBP	1913	147.49	21.29	145	93.5	242		3044	148.31	20.83	146	89.5	269.5		4957	147.99	21.01	145.5	89.5	269.5
		DBP	1913	86.73	11.32	86	49	146.5		3044	88.93	11.32	89.5	50	137.5		4957	88.08	11.37	88	49	146.5
		MAP	1913	106.98	13.15	106.17	68.33	177.33		3044	108.72	13.16	108.17	65.67	166		4957	108.05	13.18	107.33	65.67	177.33
		PP	1913	60.76	16.9	58	21.5	137		3044	59.37	16	57	10	155.23		4957	59.91	16.36	57.5	10	155.23
Precocious Coronary Artery Disease	PROCARDIS-controls	SBP	219	135.62	16.91	133.5	103.5	193		805	138.58	20.33	135	95	221.5		1024	137.95	19.68	135	95	221.5
		DBP	219	84.77	9.53	84.5	64.5	115		805	85.75	11.3	85	60	139.5		1024	85.54	10.95	85	60	139.5
		MAP	219	101.72	10.75	100	81.5	139		805	103.36	13.44	101.33	75	164.5		1024	103.01	12.92	100.83	75	164.5
		PP	219	50.84	13.47	49	25.5	97.5		805	52.83	13.8	50	25	103		1024	52.41	13.75	50	25	103
Stockholm Heart Epidemiology Project	SHEEP-controls	SBP	128	145.89	22.7	142.5	104	260		1397	140.41	21.21	139	97.5	225		1525	140.87	21.39	140	97.5	260
		DBP	128	83.5	10.72	83.25	45	110		1395	83.81	10.67	82.5	52	127.5		1523	83.78	10.67	82.5	45	127.5
		MAP	128	104.3	12.82	102.33	76.67	148.33		1395	102.68	12.95	101.67	72.5	147.5		1523	102.81	12.94	101.67	72.5	148.33
		PP	128	62.39	19.45	60	30	167.5		1395	56.6	16.24	54	18	130		1523	57.09	16.6	55	18	167.5
Stockholm Heart Epidemiology Project	SHEEP-cases	SBP	123	138.49	24.39	137.5	82.5	205		1029	131.21	19.81	130	80	202		1152	131.99	20.46	130	80	205
		DBP	122	80.52	11.3	80	50	120		1030	79.57	9.97	80	44	110		1152	79.67	10.12	80	44	120
		MAP	122	100	13.91	99.67	66.67	140		1029	96.78	11.95	96.17	65	136.67		1151	97.12	12.21	96.67	65	140
		PP	122	58.43	19.3	55.5	26	115		1029	51.64	15.64	50	10	141		1151	52.36	16.19	50	10	141
Study of Health in Pomerania	SHIP-0	SBP	627	145.901	26.3343	144.333	79.6667	228.333		3144	139.217	23.713	136.333	84	229		3771	140.328	24.2927	137.333	79.6667	229
		DBP	627	87.1066	13.8867	86.6667	53.6667	163.83		3144	86.0243	12.6467	84.6667	51.6667	153.667		3771	86.2042	12.8656	85	51.6667	163.83
		MAP	627	106.718	16.9982	105.778	66.1111	184.667		3144	103.755	15.6013	102.111	64.3333	175.444		3771	104.248	15.8781	102.556	64.3333	184.667
		PP	627	58.7746	18.1162	56.3333	14.6667	133.333		3144	53.1925	15.0989	50.6667	17.6667	118.667		3771	54.1207	15.7759	51.3333	14.6667	133.333
Study of Health in Pomerania	SHIP-Trend	SBP	108	129.966	20.2038	129.333	96.6667	178.667		869	129.454	19.5647	127.667	82	222		977	129.51	19.6264	127.667	82	222
		DBP	108	79.8688	12.6978	77.1667	58.3333	125.5		869	79.9484	11.0274	79	54	120.333		977	79.9396	11.2172	79	54	125.5
		MAP	108	96.5679	14.6181	94.8333	71.5556	137.333		869	96.4502	13.1209	95.4444	65.7778	149.333		977	96.4632	13.2867	95.4444	65.7778	149.333
		PP	108	50.0972	11.5929	49.3333	31.3333	79.3333		869	49.5054	12.8165	47.6667	17.3333	109		977	49.5708	12.6828	47.6667	17.3333	109
Tracking Adolescents’ Individual Lives Survey	TRAILS	SBP	276	119.04	13.4727	116	93	162.5		988	117.961	12.2812	116	91	169.5		1264	118.197	12.5534	116	91	169.5
		DBP	276	61.3641	6.76613	61	42	84		988	60.9499	6.96516	60.5	42	102		1264	61.0403	6.92165	60.5	42	102
		MAP	276	80.5894	7.65695	79.9167	63.8333	105		988	79.9536	7.45369	79.3333	59.6667	118.833		1264	80.0924	7.50008	79.5	59.6667	118.833
		PP	276	57.6757	12.074	55.5	28	93.5		988	57.0111	11.0351	55.5	28	101.5		1264	57.1562	11.2685	55.5	28	101.5
TwinGene of the Swedish Twin Registry	TwinGene	SBP	855	141.61	22.14	140.00	92.5	240.5		4399	142.41	21.49	140	83.5	235		5254	142.28	21.6	140	83.5	240.5
		DBP	855	84.45	12.09	83	48.5	137		4399	84.62	11.65	84	48	146.5		5254	84.59	11.73	84	48	146.5
		MAP	855	103.51	14.2	102.7	70	171.5		4399	103.88	13.68	103	65.5	176		5254	103.82	13.77	103	65.5	176
		PP	855	57.16	16.31	55	22	141.5		4399	57.8	16.06	55	16	145		5254	57.69	16.1	55	16	145
UK Biobank BP	UK Biobank	SBP	9745	141.1	21.5227	139	89	254.5		115364	141.5	20.6286	139.5	83	261.5		125109	141.5	20.6998	139.5	83	261.5
		DBP	9745	83.51	11.4711	83	50	140		115368	84.61	11.2459	84	46.5	146.5		125113	84.53	11.2675	84	46.5	146.5
		MAP	9745	102.7	13.8348	101.7	64.67	163.8		115364	103.6	13.5	102.7	59	174.7		125109	103.5	13.5283	102.7	59	174.7
		PP	9745	57.62	15.1093	55.5	19.5	158		115364	56.92	14.0565	55	17.5	151.5		125109	56.98	14.1425	55	17.5	158
African Ancestry
Study Name	Cohort Name	Traits	CURD=0							CURD=1							All subjects with CURD
			N	Mean	SD	Median	Min.	Max.		N	Mean	SD	Median	Min.	Max.		N	Mean	SD	Median	Min.	Max.
African American Diabetes Heart Study	AADHS	SBP	390	145.8	21.2	145	94	213		187	145.8	20.8	144	107	226		577	145.8	21.08	144	94	226
		DBP	390	84.5	12.1	84	54	132		187	86.3	12.3	85.5	49	122		577	85.1	12.2	84	49	132
		MAP	390	104.9	13.3	104.3	68.2	159		187	106.1	13.7	105.3	69.7	156.7		577	105.3	13.4	105	68.2	159
		PP	390	61.3	17.8	59	19	128		187	59.5	16.04	58	31	118		577	60.7	17.2	59	19	128
Genetic Studies of Atherosclerosis Risk	GeneSTAR	SBP	257	137.585	19.9601	136	95	213.5		272	133.692	19.8941	131.5	93.5	192		529	135.583	20.0023	134.5	93.5	213.5
		DBP	257	84.9883	11.5892	84	55.75	121		272	83.4488	11.6649	83.25	50.5	114.5		529	84.1968	11.6427	83.5	50.5	121
		MAP	257	102.52	13.575	102.833	70.3333	145.5		272	100.197	13.5362	99.1667	66.3333	135.833		529	101.326	13.592	101	66.3333	145.5
		PP	257	52.5963	13.0874	50.5	29.5	111		272	50.2433	13.3171	49	24.5	107		529	51.3864	13.246	49.5	24.5	111
Health & Retirement Study	HRS	SBP	1072	144.406	24.2942	142.5	73.5	238		929	142.682	24.011	140.5	83.5	232		2001	143.605	24.1724	141.5	73.5	238
		DBP	1072	88.8391	13.3986	88	52	137.5		929	89.8283	14.0551	89	56	145		2001	89.2984	13.7127	88.5	52	145
		MAP	1072	107.361	16.0862	106.5	59.1667	165		929	107.446	16.5463	106.667	68.1667	171.333		2001	107.401	16.2974	106.667	59.1667	171.333
		PP	1072	55.5667	16.1068	54	7.5	129		929	52.8536	15.0137	51	20	122		2001	54.3071	15.6636	52.5	7.5	129
Loyola University - African Cohorts	Loyola-GXE	SBP	165	116.427	13.7176	114	90	161		447	118.623	14.2289	116	90	203.406		612	118.031	14.1154	116	90	203.406
		DBP	165	70.6545	10.0557	70	47	102		447	71.5761	10.3249	71	36	130		612	71.3276	10.253	71	36	130
		MAP	165	85.9121	10.3215	84.6667	67.3333	121		447	87.2478	10.4051	86	63.6667	149.767		612	86.8877	10.3911	85.5	63.6667	149.767
		PP	165	45.7727	10.3059	46	21	77		447	47.0705	11.4743	46	19	103		612	46.7206	11.1779	46	19	103
Loyola University - African Cohorts	Loyola-SPT	SBP	592	123.535	23.7761	117	81	234		312	120.144	20.3146	116	82	216		904	122.365	22.6873	117	81	234
		DBP	592	71.0625	15.0064	70	34	123		312	69.9487	14.2769	69	32	141		904	70.6781	14.7603	70	32	141
		MAP	592	88.5535	16.5948	86	53.3333	145.333		312	86.6806	15.0215	84.5	48.6667	155		904	87.9071	16.0855	85.3333	48.6667	155
		PP	592	52.473	16.8606	50	21	135		312	50.1955	14.6668	47.5	22	121		904	51.6869	16.1654	49	21	135
Hypertension Genetic Epidemiology Network - Axiom Chip GWAS	HyperGEN-AXIOM	SBP	285	136.7	25.69	134	86	223.5		133	136.1	25.45	132	94	246		418	136.5	25.58	134	86	246
		DBP	285	78.18	12.99	77.5	45.5	118		133	80.64	14.2	79	48.5	120		418	78.96	13.42	78.5	45.5	120
		MAP	285	97.7	16.25	97.33	61.33	145.2		133	99.12	17.18	96.83	65.17	157.3		418	98.15	16.54	97.25	61.33	157.3
		PP	285	58.54	17.55	55.5	26	144.5		133	55.47	15.74	52	26.5	133		418	57.56	17.04	54.5	26	144.5
Asian Ancestry
Study Name	Cohort Name	Traits	CURD=0							CURD=1							All subjects with CURD
			N	Mean	SD	Median	Min.	Max.		N	Mean	SD	Median	Min.	Max.		N	Mean	SD	Median	Min.	Max.
Biobank Japan Project	BBJ	SBP	73544	134.099	20.1012	133	70	260		47703	135.448	19.4754	135	72	276		121247	134.63	19.8682	134	70	276
		DBP	73544	78.6931	12.1763	80	30	157		47703	80.8437	12.2912	80	30	160		121247	79.5392	12.2667	80	30	160
		MAP	73544	97.1618	13.7247	96.6667	47	173.333		47703	99.0452	13.6592	98.3333	51	185		121247	97.9028	13.7298	97.3333	47	185
		PP	73544	55.4063	14.2555	55	10	162		47703	54.6045	13.5122	54	10	156		121247	55.0908	13.9732	55	10	162
Beijing Eye Study	BES-610	SBP	438	138.96	25.15	137	84	231		131	138.4	21.1	137	92	193		569	138.83	24.26	137	84	231
		DBP	438	76.04	14.2	75	41	128		131	77.34	13.44	78	38	110		569	76.34	14.02	75	38	128
		MAP	438	97.01	17.09	95.33	56.67	160.33		131	97.69	14.78	98.67	59.67	129		569	97.17	16.58	95.67	56.67	160.33
		PP	438	62.91	15.44	61	30	117		131	61.07	15.02	59	33	104		569	62.49	15.35	61	30	117
Beijing Eye Study	BES-omniexpress	SBP	452	134.62	22.72	133	85	217		76	133.67	21.54	132.5	89	181		528	134.48	22.54	133	85	217
		DBP	452	72.67	13	72	44	126		76	75.82	15.22	75	45	113		528	73.12	13.37	72	44	126
		MAP	452	93.32	15.38	92.67	59	153		76	95.1	16.54	94.33	64	130.67		528	93.58	15.55	93	59	153
		PP	452	61.95	14.72	61	26	120		76	57.86	12.62	55.5	31	87		528	61.36	14.5	60	26	120
Cardio-metabolic Genome Epidemiology Network-Amagasaki	CAGE	SBP	238	125.6	19.6718	123.8	88	192		702	128.8	18.9992	127	87	193		940	128	19.214	126	87	193
		DBP	238	75.74	12.5026	74	52	116		702	79.13	12.0842	78	44	117		940	78.27	12.274	77	44	117
		MAP	238	92.35	14.6238	91	65	141.3		702	95.7	14.0811	94.33	59.33	139		940	94.85	14.2873	93	59.33	141.3
		PP	238	49.84	9.33102	49	29	84		702	49.71	9.34327	49	5	89		940	49.74	9.33535	49	5	89
Wuhan GWAS - Dongfeng-Tongji Cohort Study	DF-TJ	SBP	917	135.403	22.19	135	90	215		491	133.525	21.4987	130	85	195		1408	134.749	21.962	135	85	215
		DBP	916	81.9498	12.5303	80	55	129		492	81.002	12.8125	80	30	130		1408	81.6186	12.6331	80	30	130
		MAP	916	99.766	14.6457	99.3333	70	151.667		491	98.4569	14.6172	96.6667	60	143.333		1407	99.3092	14.6439	98.3333	60	151.667
		PP	916	53.4487	15.6573	50	10	115		491	52.6029	14.6959	50	20	110		1407	53.1535	15.3287	50	10	115
London Life Sciences Prospective Population Study	LOLIPOP-IA317	SBP	1085	133.462	22.4504	129	91	237		974	141.139	23.9801	139	89	246		2059	137.093	23.4958	133	89	246
		DBP	1085	82.494	13.1538	81	54	128		974	87.9404	14.1241	87	55	138		2059	85.0704	13.887	83	54	138
		MAP	1085	99.482	15.6014	97	67	154		974	105.689	16.7318	104	68	166		2059	102.418	16.4369	100	67	166
		PP	1085	50.9677	13.4715	48	15	125		974	53.1981	14.2006	50	23	137		2059	52.0228	13.8627	49	15	137
London Life Sciences Prospective Population Study	LOLIPOP-IA610-case	SBP	1925	147.96	23.5545	147	77	238		863	149.313	23.148	150	90	238		2788	148.379	23.4294	148	77	238
		DBP	1925	86.4192	12.4634	86	54	170		863	89.9432	12.45	90	55	145		2788	87.512	12.5613	88	54	170
		MAP	1925	106.936	14.8104	107	62	193		863	109.746	14.8585	110	70	176		2788	107.807	14.877	108	62	193
		PP	1925	61.5413	17.658	60	18	145		863	59.3696	16.6223	58	20	119		2788	60.867	17.3673	59	18	145
London Life Sciences Prospective Population Study	LOLIPOP-IA610-ctrl	SBP	2207	134.404	21.2896	131	84	282		1546	141.032	20.7907	139	94	226		3753	137.129	21.3269	135	84	282
		DBP	2207	83.5202	11.3574	82	51	143		1546	88.0918	11.299	87	55	133		3753	85.404	11.5522	85	51	143
		MAP	2207	100.477	13.8465	99	65	189		1546	105.737	13.6179	105	69	157		3753	102.642	13.9899	102	65	189
		PP	2207	50.8835	14.2941	48	19	139		1546	52.9405	14.0336	51	20	114		3753	51.7251	14.2162	49	19	139
London Life Sciences Prospective Population Study	LOLIPOP-IAP	SBP	235	136.349	21.5692	132	95	212		266	144.921	21.9703	143	103	212		501	140.9	22.1786	139	95	212
		DBP	235	84.2894	12.2035	82	59	123		266	90.7143	13.0754	90	66	131		501	87.7006	13.0618	86	59	131
		MAP	235	101.643	14.6806	99	71	149		266	108.816	15.3557	107.5	78	154		501	105.451	15.4491	104	71	154
		PP	235	52.0596	13.257	49	29	104		266	54.2068	13.2194	52.5	26	108		501	53.1996	13.2673	51	26	108
London Life Sciences Prospective Population Study	LOLIPOP-OmniEE	SBP	636	130.954	21.1821	128	85	235		262	137.183	21.0736	136	102	244		898	132.772	21.3277	130	85	244
		DBP	636	82.0362	11.7417	81	52	135		262	87.2824	13.1148	86.5	53	149		898	83.5668	12.383	82	52	149
		MAP	636	98.3491	14.1242	97	65	168		262	103.885	15.1532	103	70	181		898	99.9644	14.6417	98.5	65	181
		PP	636	48.9025	13.6819	46	22	118		262	49.9275	12.2355	48	27	96		898	49.2016	13.2776	47	22	118
Ragama Health Study	RHS	SBP	1735	138.5	25.2158	134	80	275		738	137.4	24.1818	134	89	244		2473	138.2	24.9115	134	80	275
		DBP	1734	81.39	13.6453	80	47	141		737	81.5	14.1753	80	48	124		2471	81.42	13.8027	80	47	141
		MAP	1734	100.4	16.7622	98	59.33	178.3		737	100.1	16.7912	98	66.67	164		2471	100.3	16.768	98	59.33	178.3
		PP	1734	57.06	15.5944	54	28	145		737	55.81	13.8629	54	28	123		2471	56.69	15.1069	54	28	145
Shanghai Men's/Women's Health Study	SMHS/SWHS	SBP	3533	132.659	23.0262	130	76	235		329	134.83	20.3215	130	80	195		3862	132.844	22.8139	130	76	235
		DBP	3533	83.0459	12.6287	80	48	140		329	86.1808	11.8271	84	57.5	120		3862	83.313	12.5913	80	48	140
		MAP	3533	99.5837	15.3202	97.3333	57.3333	171.667		329	102.397	13.986	100	66.6667	145		3862	99.8234	15.2296	98	57.333	171.667
		PP	3533	49.6007	14.6882	48	18	110		329	48.6489	12.6035	48	20	87		3862	49.5197	14.5232	48	18	110
Hispanic Ancestry
Study Name	Cohort Name	Traits	CURD=0							CURD=1							All subjects with CURD
			N	Mean	SD	Median	Min.	Max.		N	Mean	SD	Median	Min.	Max.		N	Mean	SD	Median	Min.	Max.
Insulin Resistance Atherosclerosis Study	IRASC	SBP	96	125.594	20.6227	124	85	188		88	119.903	18.931	115	92	172		184	122.872	19.9821	120	85	188
		DBP	96	81.6875	11.403	80	59	105		88	79.3068	10.6148	77.5	61	117		184	80.5489	11.0675	79	59	117
		MAP	96	96.3229	13.3521	93.8333	67.6667	131.333		88	92.839	12.8567	89	71.3333	132.667		184	94.6567	13.1976	91.8333	67.6667	132.667
		PP	96	43.9062	15.0257	41.5	16	97		88	40.5966	11.4796	39	20	80		184	42.3234	13.513	40	16	97
Insulin Resistance Atherosclerosis Study	IRASFS	SBP	354	119	18.0716	115	88	197		447	115.662	14.9383	113	82	175		801	117.137	16.4701	114	82	197
		DBP	354	77.6003	10.5504	77	50	119		447	75.7013	9.87221	75	50	108		801	76.5406	10.2147	76	50	119
		MAP	354	90.355	10.678	89	66.3333	135		447	88.44	10.1548	87	63.3333	130		801	89.2863	10.4262	88	63.3333	135
		PP	354	41.3997	12.9048	38.5	19	113		447	39.9609	10.1258	38	19	82		801	40.5968	11.4524	38	19	113
Hispanic Community Health Study / Study of Latinos	HCHS/SOL	SBP	6475	125.405	20.9888	122	77	241		5917	123.721	19.2763	121	80	247		12392	124.601	20.2059	121	77	247
		DBP	6473	74.9316	12.0289	74	39	130		5913	74.8277	12.0177	74	41	134		12386	74.882	12.0232	74	39	134
		MAP	6473	91.7577	14.0765	90	52.667	153.667		5913	91.1284	13.6481	89.667	55.333	170		12386	91.4572	13.8766	89.667	52.667	170
		PP	6473	50.4783	14.2586	47	18	162		5912	48.9105	12.3355	47	23	133		12385	49.7299	13.3975	47	18	162
Abreviations: SBP, Systolic Blood Pressure (BP); DBP, Diastolic BP; MAP, Mean Arterial Pressure; PP, Pulse Pressure; N, Number of subjects; Mean, mean levels; SD, standard deviation of mean; Median, median of values; Min, minimum value; Max, maximum value.
