# Supplementary material for: Novel genetic associations for blood pressure identified via gene-alcohol interaction in up to 570K individuals across multiple ancestries
Source: PLoS One. 2018 Jun 18;13(6):e0198166. doi: 10.1371/journal.pone.0198166 (PMC6005576; doi:10.1371/journal.pone.0198166)
Supplement: S6 Table — Characteristics of blood pressure (BP) within light/heavy drinkers (LHD: 1–7 drinks/week or ≥8 drinks/week), and in alcohol combined samples; SBP, systolic BP; DBP, diastolic BP; MAP, mean arterial pressure; PP, pulse pressure; N, number of individuals; mean, mean levels; SD, standard deviation of mean; Min, minimum value; Max, maximum value. (XLSX) [file pone.0198166.s026.xlsx]

## Sheet: S6 Table. Descriptives_BP_LHD
S6 Table. Descriptive analyses for replication data (Stage 2) in light/heavy drinkers. Characteristics of blood pressure (BP) within light/heavy drinkers, and in alcohol combined samples
European Ancestry
Study Name	Cohort Name	Traits	LHD=0 (1-7 drinks/week)							LHD=1 (≥8 drinks/week)							All subjects with LHD
			N	Mean	SD	Median	Min.	Max.		N	Mean	SD	Median	Min.	Max.		N	Mean	SD	Median	Min.	Max.
Anglo-Scandinavian Cardiac Outcomes Trial	ASCOT-SC	SBP	1206	174.2	16.31	171.5	123.5	251		648	174.5	16.36	172.5	135.5	240.5		1854	174.3	16.32	172	123.5	251
		DBP	1206	103.6	10.13	103.5	71.5	145		648	104.7	9.64	104	67.5	142		1854	104	9.97	103.5	67.5	145
		MAP	1206	127.1	10.1	125.7	102.5	166.2		648	128	97.17	126.5	97.17	161		1854	127.4	10.06	126	97.17	166.2
		PP	1206	69.5	15.74	69.5	29.5	129		648	69.79	15.24	69	31.5	129.5		1854	70.35	15.57	69.5	29.5	129.5
Anglo-Scandinavian Cardiac Outcomes Trial	ASCOT-UK	SBP	1073	175.5	17.4	172	138.5	266.5		1850	174.9	16.71	171.5	134	260.5		2923	175.1	16.97	171.5	134	266.5
		DBP	1073	101.2	9.84	101	75	145.5		1850	102.4	9.71	102	69	146		2923	102	9.77	101.5	69	146
		MAP	1073	125.9	10.47	124.3	103.3	185.8		1850	126.6	10.19	124.8	99.67	184.2		2923	126.3	10.3	124.5	99.67	185.8
		PP	1073	74.31	15.88	72.5	30	130		1850	72.46	15.29	71	25.5	139.5		2923	73.14	15.53	71.5	25.5	139.5
British Genetics of Hypertension	BRIGHT	SBP	687	166.6	20.49	164	102	243		581	168.8	20.49	166	106	264		1268	167.6	20.51	165	102	264
		DBP	687	102.5	10.83	102	66	138		581	104.6	10.66	104	74	143		1268	103.4	10.8	103	66	143
		MAP	687	123.9	12.81	123.3	78	167		581	126	12.78	124.3	84.67	174.7		1268	124.8	12.84	123.8	78	174.7
		PP	687	64.18	15.58	63	27	126		581	64.17	15.37	62	28	134		1268	64.17	15.48	62	27	134
Cohorte Lausannoise Study	CoLaus	SBP	2222	129.3	19.51	126	87.33	229.67		1724	135.64	20.25	132.67	88.67	212.67		3946	132.07	20.08	129	87.33	229.67
		DBP	2222	79.75	11.79	78.67	49	131		1724	83.27	12.06	82	49.67	131		3946	81.29	12.04	80	49	131
		MAP	2222	96.27	13.6	94.67	64.78	147.22		1724	100.73	14.04	99.28	63.78	158.22		3946	98.21	13.97	96.44	63.78	158.22
		PP	2222	49.55	12.48	47	22.67	128.06		1724	52.37	12.84	50	23.67	128.06		3946	50.78	12.71	48.33	22.67	128.06
Data from an Epidemiological Study on the Insulin Resistance - Type 2 diabetes controls	DESIR	SBP	178	126.66	12.5352	125	100	182.5		309	131.18	13.6965	130	102.5	185		487	129.528	13.4484	130	100	185
		DBP	178	77.9888	7.38432	80	62.5	110		309	79.7411	9.15315	80	60	120		487	79.1006	8.583	80	60	120
		MAP	178	94.2125	8.4268	93.3333	75	134.167		309	96.8873	9.94317	96.6667	75.8333	138.333		487	95.9097	9.49636	95	75	138.333
		PP	178	48.6713	8.92926	50	25	80		309	51.4385	9.3718	50	25	80		487	50.4271	9.29945	50	25	80
Diabetes Heart Study	DHS	SBP	156	145.5	18.9	144	108.5	201.5		20	152	24.8	149.3	115	220		176	146.2	19.7	144	108.5	220
		DBP	156	79.7	10.9	79.8	56.5	114.5		20	85.4	13.1	81.5	67.5	115		176	80.4	11.3	80	56.5	115
		MAP	156	101.7	12.3	101.9	76.2	140.8		20	107.6	15.4	108.7	87.7	150		176	102.3	12.7	102.8	76.2	150
		PP	156	65.8	14.7	64	33	105.5		20	66.6	19.5	65	37	105		176	65.8	15.3	64	33	105.5
Dose-Responses to Exercise Training	DR's EXTRA	SBP	502	154.626	23.6291	153	98	245		233	152.052	19.7363	151	105	210		735	153.81	22.4868	152	98	245
		DBP	502	87.69	11.221	87	61	121		233	89.48	10.107	88	62	124		735	88.26	10.907	88	61	124
		MAP	502	110.004	14.1131	109	75.33	163.67		233	110.336	11.9517	109.333	82.33	147.33		735	110.109	13.4583	109.333	75.33	163.77
		PP	502	66.9343	17.8594	64	30	139		233	62.573	15.7455	62	21	115		735	65.5517	17.3261	64	21	139
Estonian Genome Center - University of Tartu (Estonian Biobank)	EGCUT-OmniExpress	SBP	2197	132.55	22.4994	130	80	235		2371	131.121	20.5545	130	80	248		4568	133.3	21.9321	130	80	248
		DBP	2197	81.7137	13.2275	80	42	140		2371	81.1198	13.2122	80	40	150		4568	82.09	13.1341	80	40	150
		MAP	2197	98.6592	15.4701	96.6667	62	171.667		2371	97.7848	14.8471	95.3333	57.3333	182		4568	99.19	15.2104	96.67	57.33	182
		PP	2197	50.8366	14.3973	50	20	125		2371	50.0013	12.8418	50	20	119		4568	51.3	14.1178	50	20	125
Estonian Genome Center - University of Tartu (Estonian Biobank)	EGCUT-CoreExome	SBP	2178	122.142	19.2296	120	80	230		1939	123.07	18.1172	120	85	250		4117	123	19.162	120	80	250
		DBP	2178	76.2048	12.0224	75	50	145		1939	76.1253	11.4832	75	45	150		4117	76.52	11.9212	75	45	150
		MAP	2178	91.5173	13.7219	89.1667	63.3333	167.333		1939	91.7736	12.902	90	53.33	183.333		4117	92.06	13.5688	90	53.33	183.3
		PP	2178	45.9376	11.8734	45	20	115		1939	46.9448	11.7844	45	20	115		4117	46.71	12.1856	45	20	115
Estonian Genome Center - University of Tartu (Estonian Biobank)	EGCUT-Human370CNV	SBP	809	126.799	20.4114	120	88	205		639	128.479	20.9382	125	90	245		1448	128.5	20.8267	124	88	245
		DBP	809	79.864	12.5358	80	42	130		639	79.7304	13.2636	80	50	130		1448	80.11	12.9147	80	42	130
		MAP	809	95.5088	14.3893	93.3333	58.6667	151.667		639	95.9614	15.0218	93.3333	63.3333	168.333		1448	96.22	14.7088	93.33	58.67	168.3
		PP	809	46.9345	12.8313	45	20	110		639	48.7762	13.0612	50	20	115		1448	48.37	13.2724	45	20	115
European Prospective Investigation into Cancer and Nutrition	EPIC	SBP	11201	137.222	20.0645	135	88	220		6645	137.76	19.5321	135.5	89	231.5		17846	137.423	19.8691	135	88	231.5
		DBP	11201	83.6725	12.0958	82.5	46.5	150		6645	84.81	12.0634	83.5	52	189		17846	84.096	12.096	83	46.5	189
		MAP	11201	101.522	14.2708	100.167	61	173.333		6645	102.46	14.0584	101	66.5	199.667		17846	101.871	14.199	100.333	61	199.667
		PP	11201	53.5499	11.2403	52	21.5	103.5		6645	52.9498	10.9297	51.5	20	110		17846	53.3264	11.1291	51.5	20	110
The Fenland Study	Fenland-GWAS	SBP	996	122.43	17.0334	120.5	84.6667	189.333		276	125.452	14.7568	124.167	89.6667	175.333		1272	123.086	16.6073	121	84.6667	189.333
		DBP	996	75.3144	10.9605	74	42.3333	124		276	77.3037	10.7604	77.3333	51.6667	103.333		1272	75.7461	10.944	74.6667	42.3333	124
		MAP	996	91.0197	12.4631	89.6667	59.7778	143		276	93.3533	11.5872	92.5	64.3333	123.667		1272	91.526	12.3116	90.2222	59.7778	143
		PP	996	47.1158	9.82984	45.6667	24.3333	98		276	48.1486	8.3552	48	27.3333	81		1272	47.3399	9.53567	46.3333	24.3333	98
The Fenland Study	Fenland-OMICS	SBP	6488	123.648	16.6463	121.667	79	214		1410	127.499	16.5252	125.667	87.3333	197		7898	124.335	16.689	122	79	214
		DBP	6488	75.0427	10.9434	74	44	119		1410	76.7272	10.7361	75.3333	47.3333	112.667		7898	75.3434	10.9251	74.3333	44	119
		MAP	6488	91.2444	12.2888	89.8889	59.3333	142		1410	93.6513	12.1401	92.1111	63.3333	140.778		7898	91.674	12.2962	90.3333	59.3333	142
		PP	6488	48.605	9.76536	47.3333	23.6667	108		1410	50.7722	9.60186	49.6667	28.3333	105.333		7898	48.9919	9.77108	47.6667	23.6667	108
Finland-United States Investigation of NIDDM Genetics	FUSION CASE	SBP	409	161.101	24.5055	157	103	240		75	161.327	28.8392	163	93.5	235		484	161.136	25.1933	158	93.5	240
		DBP	409	90.879	12.946	91	39	139.5		75	97.5267	14.2755	100	67	131		484	91.9091	13.364	92	39	139.5
		MAP	409	114.286	15.0327	114.333	71.6667	164		75	118.793	18.3324	120.667	77.5	157.667		484	114.985	15.654	115	71.6667	164
		PP	409	70.2225	19.6634	69	23	130		75	63.8	18.6165	62	24	116		484	69.2273	19.6245	68	23	130
Finland-United States Investigation of NIDDM Genetics	FUSION CONTROL	SBP	182	148.5	21.1	147	107	205		18	140.8	26.8	128.5	109	190		200	147.8	21.7	146	107	205
		DBP	182	85.9	11.8	86	58	122		18	86.2	10.6	84.5	71	109		200	86	11.7	86	58	122
		MAP	182	106.8	13.6	106	75	148		18	104.4	15.1	101.5	84.3	136		200	106.6	13.7	105.8	75	148
		PP	182	62.6	16	59.8	28	118		18	54.6	19.8	45.5	29	94		200	61.8	16.5	59	28	118
Genetic Studies of Atherosclerosis Risk	GeneSTAR	SBP
		DBP
		MAP
		PP
Genetics of Lobular Carcinoma In Situ in Europe	GLACIER	SBP	5311	129.597	19.7824	125	80	235		153	133.98	18.6461	130	100	199		5464	129.72	19.7631	125	80	235
		DBP	5364	81.3896	13.9921	80	40	155.433		155	85.5411	14.2408	84	60	155.433		5519	81.5062	14.0146	80	40	155.433
		MAP	5309	96.9577	13.7804	95	60	171.333		153	101.078	13.3859	98.3333	76.6667	141.667		5462	97.0732	13.7851	95	60	171.333
		PP	5364	49.8122	15.0748	47	10	132.493		155	50.4257	14.9364	48	27	132.493		5519	49.8294	15.0699	47	10	132.493
Genetic Regulation of Arterial Pressure of Humans in the Community	GRAPHIC	SBP	301	131.885	18.8026	130.5	93.5	202		559	136.987	21.3296	134	92.5	224		860	135.201	20.6138	132.5	92.5	224
		DBP	301	82.8987	11.2004	81.5	53	117.5		559	85.754	12.0091	84.5	56	139.5		860	84.7546	11.8048	83.25	53	139.5
		MAP	301	99.2276	12.9579	98	68.8333	144.333		559	102.832	14.5598	101.333	68.1667	167.667		860	101.57	14.1175	99.8333	68.1667	167.667
		PP	301	48.9867	12.2914	47.5	18	93.5		559	51.2326	12.694	49.5	20.5	108.5		860	50.4465	12.5931	49	18	108.5
Health & Retirement Study	HRS	SBP	3856	133.89	21.5621	132.5	77.5	214.5		1089	139.234	21.726	138	82.5	213		4945	135.067	21.7094	133.5	77.5	214.5
		DBP	3856	83.6894	12.1782	83	49	134		1089	86.6258	12.6824	86	46.5	137.5		4945	84.3361	12.3498	83.5	46.5	137.5
		MAP	3856	100.423	14.4856	99.8333	59.5	156		1089	104.162	14.8773	103.333	63	158.833		4945	101.246	14.6534	100.667	59.5	158.833
		PP	3856	50.2009	14.0737	48.5	17.5	115.5		1089	52.6084	13.9479	51	18.5	113		4945	50.731	14.0801	49	17.5	115.5
Italian National Genome Initiative	INGI-CARL	SBP
		DBP
		MAP
		PP
Italian National Genome Initiative	INGI-FVG	SBP
		DBP
		MAP
		PP
T2DM study nested within EPIC	InterAct-CoreExome CASES	SBP	2237	147.875	23.1732	146	82	275		1339	151.666	22.9618	150	90	247		3576	149.294	23.1639	147	82	275
		DBP	2237	89.5825	12.7465	89	40	139.5		1339	91.6033	12.6963	90	58	162.799		3576	90.3392	12.7635	90	40	162.799
		MAP	2237	109.013	15.1761	107.333	56.6667	171.667		1339	111.628	15.031	110	70.6667	179.333		3576	109.992	15.1727	108.333	56.6667	179.333
		PP	2237	58.2875	15.9893	57	6.5	144.652		1339	60.0539	16.1182	58	10	144.652		3576	58.9489	16.0583	57	6.5	144.652
T2DM study nested within EPIC	InterAct-CoreExome SUBCOHORT	SBP	3643	133.809	22.1032	130	82	245		2143	137.646	21.1232	135	84	239		5786	135.231	21.8224	132	82	245
		DBP	3643	82.4133	12.2639	80	48	142.5		2143	84.5401	11.9174	83.5	50	140		5786	83.201	12.1791	81.25	48	142.5
		MAP	3643	99.5453	14.6995	97.3333	62	169		2143	102.242	14.0912	100.333	69.3333	165		5786	100.544	14.5344	98.6667	62	169
		PP	3643	51.3961	14.5499	50	12	135		2143	53.1062	14.2066	51	13	117		5786	52.0295	14.4461	50	12	135
T2DM study nested within EPIC	InterAct-GWAS CASES	SBP	1629	145.174	22.1218	142	79	228.5		689	147.517	22.8468	145	96.5	255		2318	145.87	22.3605	142.75	79	255
		DBP	1628	89.3372	12.8148	89	48	140		689	90.926	12.159	90	46.5	135		2317	89.8097	12.6417	90	46.5	140
		MAP	1628	107.948	14.9225	106.667	58.3333	168.333		689	109.79	14.7486	108.333	71.6667	165		2317	108.496	14.8917	106.667	58.3333	168.333
		PP	1628	55.8332	15.0025	53.75	22	121.5		689	56.5583	15.5306	54	19	144.652		2317	56.0488	15.1617	54	19	144.652
T2DM study nested within EPIC	InterAct-GWAS SUBCOHORT	SBP	1979	132.15	21.3906	129	80	230		785	134.951	20.6879	131	89.5	229		2764	132.946	21.2273	130	80	230
		DBP	1978	82.0765	11.998	80	50	162.799		785	84.7306	12.3239	84	49.5	144		2763	82.8306	12.1484	81	49.5	162.799
		MAP	1978	98.7794	14.2657	96.6667	60	195.773		785	101.471	14.3539	100	62.8333	164.333		2763	99.544	14.3397	97.6667	60	195.773
		PP	1978	50.0716	14.3948	48	18	144.652		785	50.2204	13.0561	48	8	113		2763	50.1139	14.0253	48	8	144.652
Cooperative Health Research in the Augsburg Region	KORA S3	SBP	809	129.854	19.6939	127	85	219		1314	133.763	19.5696	131	85	217		2123	132.274	19.7041	130	85	219
		DBP	809	80.5377	12.013	80	45	132		1314	82.4833	11.9839	82	49	127		2123	81.7419	12.0294	81	45	132
		MAP	809	96.9765	13.5791	96	65.6667	161		1314	99.5766	13.4794	98.3333	64.3333	151		2123	98.5858	13.5732	97.3333	64.3333	161
		PP	809	49.3164	13.5997	47	19	123		1314	51.2801	13.6992	49	20	111		2123	50.5318	13.6914	48	19	123
Cooperative Health Research in the Augsburg Region	KORA S4	SBP	1199	128.248	20.8528	125	82	232		1541	133.899	20.8762	131	77	228		2740	131.426	21.0498	128.5	77	232
		DBP	1199	80.7907	11.6313	79	53	133		1541	83.5227	11.3829	82.5	49.5	143		2740	82.3272	11.5698	81	49.5	143
		MAP	1199	96.6097	13.9947	94.5	63.3333	156		1541	100.315	13.8089	98.8333	58.6667	171.333		2740	98.6936	14.0091	96.8333	58.6667	171.333
		PP	1199	47.4571	13.2962	44.5	22	114		1541	50.3767	13.5775	48	19.5	110.5		2740	49.0991	13.5305	46.75	19.5	114
Lothian Birth Cohort	LBC1921	SBP	335	172.79	28.07	172	81	253		52	176.85	27.85	177.5	97	232		387	173.34	28.04	173	81	253
		DBP	335	86.52	14.02	85	54	133		52	85.73	14.33	85	43	118		387	86.41	14.04	85	43	133
		MAP	335	115.28	17.21	115	67.67	172		52	116.1	16.81	115.33	69	152.67		387	115.39	17.13	115	67.67	172
		PP	335	86.28	20.94	86	20	151		52	91.12	22.52	89	28	139		387	86.93	21.2	86	20	151
Lothian Birth Cohort	LBC1936	SBP	560	154.65	20.18	152.67	100	220		242	156.77	21.71	156.33	104.67	220.67		802	155.29	20.66	154	100	220.67
		DBP	560	84.76	10.9	84.5	54	118.33		242	86.67	12.01	86.5	56.67	126.33		802	85.34	11.27	85	54	126.33
		MAP	560	108.06	12.84	107.33	69.33	147.22		242	110.04	14.12	110.5	77.44	156		802	108.65	13.26	108.39	69.33	156
		PP	560	69.89	15.01	68.33	30.33	130		242	70.1	15.56	68.33	29	119.67		802	69.96	15.17	68.33	29	130
Lifelines Cohort Study	LifeLines	SBP	3343	130.525	18.03	128	89	234		2163	134.23	18.4113	132	90	218		5506	131.98	18.2689	130	89	234
		DBP	3343	76.322	10.0821	75	47	137.519		2163	79.1602	10.4013	79	53	137.519		5506	77.437	10.3014	76	47	137.519
		MAP	3343	94.3882	11.8637	92.6667	65	165.219		2163	97.5171	12.1846	96	68.6667	165.219		5506	95.6174	12.0867	94	65	165.219
		PP	3343	54.1989	12.5721	53	24	115		2163	55.068	12.8492	54	24	124		5506	54.5403	12.6876	53	24	124
Long Life Family Study	LLFS	SBP	1157	131.979	20.7478	130	85	229		749	137.808	22.0798	135	93	254		1906	134.27	21.4651	132	85	254
		DBP	1157	81.9576	11.4119	81	47	132		749	85.0854	12.0287	84	58	131		1906	83.1868	11.7548	82.5	47	132
		MAP	1157	98.6315	13.6508	97.6667	63.6667	155.333		749	102.66	14.4305	101.333	69.6667	169.333		1906	100.214	14.0966	99.6667	63.6667	169.333
		PP	1157	50.0216	14.0661	48	24	129		749	52.7223	15.1088	50	21	133		1906	51.0829	14.5409	49	21	133
London Life Sciences Prospective Population Study	LOLIPOP-EW610	SBP	311	133.913	20.1024	131	92	205		372	138.282	20.864	136.5	87	221		683	136.234	20.856	134	87	221
		DBP	311	82.5113	11.516	81	60	121		372	84.25	10.9738	83.5	56	114		683	83.0529	11.2842	82	56	121
		MAP	311	99.6624	13.7289	98	73	149		372	102.261	13.5169	101	66	149		683	100.794	13.7815	99	66	149
		PP	311	51.4019	12.4712	49	22	101		372	54.0323	13.9109	52	22	108		683	53.1812	13.445	51	22	108
London Life Sciences Prospective Population Study	LOLIPOP-EWA	SBP	202	141.203	23.9004	138.5	94	224		232	141.513	20.377	139	91	201		434	140.168	22.1019	138	91	224
		DBP	202	84.7376	12.3987	84	57	126		232	85.625	12.1364	85	57	123		434	84.6306	12.2633	84	57	126
		MAP	202	103.564	15.4046	102.5	73	154		232	104.254	14.0398	104	71	147		434	103.146	14.6892	102	71	154
		PP	202	56.4654	15.8667	53	25	119		232	55.8879	13.2641	54	29	104		434	55.5378	14.5948	53	25	119
London Life Sciences Prospective Population Study	LOLIPOP-EWP	SBP	211	135.744	19.8065	134	93	212		301	145.512	22.4549	143	98	222		512	141.696	22.0833	139	93	222
		DBP	211	82.1943	11.9098	81	55	115		301	87.1429	12.2239	87	57	132		512	85.1491	12.3205	85	54	132
		MAP	211	100.043	13.9592	99	70	142		301	106.598	14.9073	105	74	151		512	103.994	14.881	103	69	151
		PP	211	53.5498	11.8189	52	29	105		301	58.3688	14.2728	56	32	110		512	56.5466	13.8205	54	26	110
Metabolic Syndrome In Men	METSIM	SBP	3505	142.823	19.5201	140.667	98	251		3102	145.727	19.8025	144	100	235		6607	144.187	19.7051	142	98	251
		DBP	3505	90.5052	10.8787	90	60.6667	132.667		3102	93.1076	11.321	92.6667	56	130		6607	91.727	11.1635	90.6667	56	132.667
		MAP	3505	107.945	12.8051	107.111	77.1111	163.222		3102	110.648	13.271	109.833	70.6667	158.778		6607	109.214	13.0946	108.222	70.6667	163.222
		PP	3505	52.3182	13.7377	50	19.3333	131.667		3102	52.6198	13.4225	50.6667	24	131.333		6607	52.4598	13.5904	50.3333	19.3333	131.667
Netherlands Study of Depression and Anxiety	NESDA	SBP	1132	133.852	18.9315	129.5	65.5	222.5		995	139.246	21.1048	135.5	99	221.5		2127	136.376	20.1534	132.5	65.5	222.5
		DBP	1132	80.633	11.0028	79.5	35.5	124		995	83.1171	11.6299	81.5	52.5	124		2127	81.795	11.3656	80.5	35.5	124
		MAP	1132	98.3728	12.9045	96.3333	45.5	144.667		995	101.827	13.9893	99.6667	69	154.167		2127	99.9886	13.5299	97.6667	45.5	154.167
		PP	1132	53.2186	12.3007	51	29.5	118		995	56.1271	13.8931	54	25	121		2127	54.5792	13.147	52.5	25	121
Prevention of Renal and Vascular Endstage Disease	PREVEND	SBP	1794	128.679	20.9725	124	88	227		978	133.105	21.3793	131	85	227		2772	130.241	21.2188	126	85	227
		DBP	1794	74.0463	10.7725	73	48	117		978	77.3609	10.9079	76	51	114		2772	75.2157	10.9339	74	48	117
		MAP	1794	92.2572	13.521	89.6667	63.3333	150.333		978	95.9424	13.7026	94.6667	66.3333	145		2772	93.5574	13.6966	91.3333	63.3333	150.333
		PP	1794	54.6327	13.6097	52	24	122		978	55.7444	14.058	54	28	123		2772	55.0249	13.7773	53	24	123
French obese cases	OBA	SBP
		DBP
		MAP
		PP
Precocious Coronary Artery Disease	PROCARDIS-cases	SBP	1350	147.22	20.86	145	89.5	241		1309	150.17	20.92	148	97	269.5		2659	148.67	20.94	146.5	89.5	269.5
		DBP	1350	88.49	11.28	89	51	131		1309	90.08	11.19	90	50	135		2659	89.27	11.26	90	50	135
		MAP	1350	108.06	13.1	107.75	69.17	163.33		1309	110.11	13.08	109.33	65.67	166		2659	109.07	13.13	108.33	65.67	166
		PP	1350	58.73	16.2	56	22	134		1309	60.09	16.15	57.5	10	155.23		2659	59.4	16.19	57	10	155.23
Precocious Coronary Artery Disease	PROCARDIS-controls	SBP	355	141.51	22.05	140	103	221.5		412	135.84	18.39	130.5	95	221		767	138.47	20.35	135	95	221.5
		DBP	355	86.28	12.24	85	60	139.5		412	85.35	10.4	84.25	60	120.5		767	85.78	11.29	85	60	139.5
		MAP	355	104.69	14.64	103.33	75.67	164.5		412	102.18	12.23	100	75	153.67		767	103.34	13.45	101	75	164.5
		PP	355	55.23	14.61	52	28	101		412	50.49	12.61	50	25	101		767	52.68	13.77	50	25	101
Stockholm Heart Epidemiology Project	SHEEP-controls	SBP	830	140.28	21.26	139	97.5	210		567	140.6	21.16	140	100	225		1397	140.41	21.21	139	97.5	225
		DBP	829	83.18	10.34	82	52	127.5		566	84.73	11.09	84	60	122		1395	83.81	10.67	82.5	52	127.5
		MAP	829	102.21	12.6	101.67	72.5	147.5		566	103.36	13.42	102	73.33	146.67		1395	102.68	12.95	101.67	72.5	147.5
		PP	829	57.09	16.89	55	20	130		566	55.88	15.22	54	18	117.5		1395	56.6	16.24	54	18	130
Stockholm Heart Epidemiology Project	SHEEP-cases	SBP	614	131.33	20.36	130	80	202		415	131.02	18.99	130	87.5	200		1029	131.21	19.81	130	80	202
		DBP	615	78.9	10.07	80	44	110		415	80.56	9.76	80	49	107		1030	79.57	9.97	80	44	110
		MAP	614	96.37	12.13	95.33	65	136.67		415	97.38	11.67	97.33	69.17	134		1029	96.78	11.95	96.17	65	136.67
		PP	614	52.44	16.25	50	10	141		415	50.46	14.62	49	10	105		1029	51.64	15.64	50	10	141
Study of Health in Pomerania	SHIP-0	SBP	2166	137.455	24.0516	134.667	84	224		978	143.118	22.4705	140.667	97	229		3144	139.217	23.713	136.333	84	229
		DBP	2166	84.6988	12.3071	83.3333	54	153.667		978	88.9598	12.8982	87.3333	51.6667	136.333		3144	86.0243	12.6467	84.6667	51.6667	153.667
		MAP	2166	102.284	15.4595	100.5	64.3333	175.444		978	107.013	15.427	105.778	72.4444	161.667		3144	103.755	15.6013	102.111	64.3333	175.444
		PP	2166	52.7564	15.7046	50	17.6667	118.667		978	54.1585	13.6202	52	25.3333	118		3144	53.1925	15.0989	50.6667	17.6667	118.667
Study of Health in Pomerania	SHIP-Trend	SBP	702	128.161	19.1927	126.333	82	193		167	134.886	20.2289	131.667	87.3333	222		869	129.454	19.5647	127.667	82	222
		DBP	702	79.298	10.7639	78.6667	54	116.667		167	82.6826	11.7165	82.3333	57.3333	120.333		869	79.9484	11.0274	79	54	120.333
		MAP	702	95.5858	12.8049	94.6667	65.7778	135.778		167	100.084	13.833	99.4444	69.3333	149.333		869	96.4502	13.1209	95.4444	65.7778	149.333
		PP	702	48.8635	12.7389	47	17.3333	100.333		167	52.2036	12.8282	50.3333	27	109		869	49.5054	12.8165	47.6667	17.3333	109
Tracking Adolescents’ Individual Lives Survey	TRAILS	SBP	653	117.021	11.8283	115.5	91	163.5		333	119.851	12.9587	117.5	96	169.5		986	117.977	12.2884	116	91	169.5
		DBP	653	60.8729	6.63584	60.5	42	84		333	61.1426	7.57641	60.5	45	102		986	60.964	6.96503	60.5	42	102
		MAP	653	79.5891	7.19591	79.1667	59.6667	104		333	80.7122	7.89402	79.8333	64.1667	118.833		986	79.9684	7.45397	79.3333	59.6667	118.833
		PP	653	56.1485	10.438	55	30.5	89.5		333	58.7087	11.9865	57	28	101.5		986	57.0132	11.046	55.5	28	101.5
TwinGene of the Swedish Twin Registry	TwinGene	SBP	4038	142.33	21.47	140	83.5	235		361	143.36	21.67	140	94.5	220		4399	142.41	21.49	140	83.5	235
		DBP	4038	84.5	11.7	83.5	48	146.5		361	85.95	11.01	85	57.5	131		4399	84.62	11.65	84	48	146.5
		MAP	4038	103.77	13.72	102.8	65.5	176		361	105.08	13.17	104.2	73.3	154		4399	103.88	13.69	103	65.5	176
		PP	4038	57.83	15.98	55.5	16	145		361	57.41	16.95	55	22.5	121.5		4399	57.8	16.06	55	16	145
UK Biobank BP	UK Biobank	SBP
		DBP
		MAP
		PP
African Ancestry
Study Name	Cohort Name	Traits	LHD=0							LHD=1							All subjects with LHD
			N	Mean	SD	Median	Min.	Max.		N	Mean	SD	Median	Min.	Max.		N	Mean	SD	Median	Min.	Max.
African American Diabetes Heart Study	AADHS	SBP
		DBP
		MAP
		PP
Genetic Studies of Atherosclerosis Risk	GeneSTAR	SBP
		DBP
		MAP
		PP
Health & Retirement Study	HRS	SBP	768	142.506	24.3525	140.5	83.5	232		161	143.522	22.3629	142	98	216		929	142.682	24.011	140.5	83.5	232
		DBP	768	89.5677	14.0078	88.5	56.5	145		161	91.0714	14.257	89.5	56	131.5		929	89.8283	14.0551	89	56	145
		MAP	768	107.214	16.5794	106.667	68.1667	171.333		161	108.555	16.3932	106.833	71.8333	159.333		929	107.446	16.5463	106.667	68.1667	171.333
		PP	768	52.9382	15.5328	51	20	122		161	52.4503	12.2726	51.5	29	101		929	52.8536	15.0137	51	20	122
Loyola University - African Cohorts	Loyola-GXE	SBP
		DBP
		MAP
		PP
Loyola University - African Cohorts	Loyola-SPT	SBP
		DBP
		MAP
		PP
Hypertension Genetic Epidemiology Network - Axiom Chip GWAS	HyperGEN-AXIOM	SBP	77	135.3	25.56	131.5	94	246		56	137.2	25.48	132.2	95.5	207		133	136.1	25.45	132	94	246
		DBP	77	80.21	14.03	79.5	48.5	115.5		56	81.21	14.55	79	52	120		133	80.64	14.2	79	48.5	120
		MAP	77	98.57	17.1	96	65.17	157.3		56	99.89	17.42	97.42	71.5	139		133	99.12	17.18	96.83	65.17	157.3
		PP	77	55.06	15.92	50.5	27	133		56	56.02	15.62	52.75	26.5	102		133	55.47	15.74	52	26.5	133
Asian Ancestry
Study Name	Cohort Name	Traits	LHD=0							LHD=1							All subjects with LHD
			N	Mean	SD	Median	Min.	Max.		N	Mean	SD	Median	Min.	Max.		N	Mean	SD	Median	Min.	Max.
Biobank Japan Project	BBJ	SBP	21505	132.944	19.5643	131	72	235		26198	137.504	19.1594	136	76	276		47703	135.448	19.4754	135	72	276
		DBP	21505	79.3553	12.2685	80	30	160		26198	82.0654	12.1747	80	33	156		47703	80.8437	12.2912	80	30	160
		MAP	21505	97.2182	13.6796	96.6667	51	185		26198	100.545	13.4585	100	52	172.333		47703	99.0452	13.6592	98.3333	51	185
		PP	21505	53.5887	13.55	52	10	135		26198	55.4383	13.4241	55	10	156		47703	54.6045	13.5122	54	10	156
Beijing Eye Study	BES-610	SBP	67	136.34	20.27	136	92	187		50	140.24	21.99	138	94	193		117	138.01	21.02	137	92	193
		DBP	67	74.51	12.59	74	38	102		50	80.5	13.67	81.5	45	110		117	77.07	13.35	78	38	110
		MAP	67	95.12	13.71	94	59.67	121.67		50	100.41	15.47	102.83	64.67	129		117	97.38	14.66	98.67	59.67	129
		PP	67	61.84	15.68	61	35	104		50	59.74	14.45	57.5	33	100		117	60.94	15.14	59	33	104
Beijing Eye Study	BES-omniexpress	SBP	50	132.1	20.1	132.5	89	181		14	144.4	26.1	150.5	94	177		64	134.8	21.9	133.5	89	181
		DBP	50	73.5	13.3	74	45	107		14	88.1	17.9	90	54	113		64	76.7	15.5	76	45	113
		MAP	50	93	14.8	93.8	64	130.7		14	106.8	19.7	112.3	68	129.7		64	96.1	16.9	95.3	64	130.7
		PP	50	58.6	12.1	57	31	87		14	56.3	15.2	51.5	39	84		64	58.1	12.7	55	31	87
Cardio-metabolic Genome Epidemiology Network-Amagasaki	CAGE	SBP
		DBP
		MAP
		PP
Wuhan GWAS - Dongfeng-Tongji Cohort Study	DF-TJ	SBP	224	135.853	23.1426	135	90	215		123	133.829	20.9315	135	85	190		347	135.135	22.3743	135	85	215
		DBP	224	81.2946	12.4966	80	60	110		123	80.5447	12.9344	80	60	129		347	81.0288	12.6399	80	60	129
		MAP	224	99.4807	14.9095	98.3333	71.6667	145		123	98.3062	14.7801	96.6667	68.3333	149		347	99.0644	14.853	96.6667	68.3333	149
		PP	224	54.558	16.4784	50	10	115		123	53.2846	13.2687	50	20	90		347	54.1066	15.4097	50	10	115
London Life Sciences Prospective Population Study	LOLIPOP-IA317	SBP	556	138.637	23.5087	135	89	225		418	144.466	24.2234	142	96	246		974	137.093	23.4958	133	89	222
		DBP	556	86.304	13.6121	85	55	138		418	90.1172	14.5103	89	59	137		974	85.0704	13.887	83	54	132
		MAP	556	103.757	16.2558	102	68	166		418	108.258	17.0271	107	71	161		974	102.418	16.4369	100	67	151
		PP	556	52.3327	13.9397	49	23	111		418	54.3493	14.4771	52	25	137		974	52.0228	13.8627	49	15	110
London Life Sciences Prospective Population Study	LOLIPOP-IA610-case	SBP	492	147.337	22.8453	147.5	94	221		371	151.933	23.3169	153	90	238		863	148.379	23.4294	148	77	238
		DBP	492	88.3842	11.7924	89	55	121		371	92.0108	13.0023	92	59	145		863	87.512	12.5613	88	54	170
		MAP	492	108.041	14.245	109	70	145		371	112.008	15.3647	113	75	176		863	107.807	14.877	108	62	193
		PP	492	58.9532	16.9655	57.5	24	119		371	59.9218	16.1621	58	20	112		863	60.867	17.3673	59	18	145
London Life Sciences Prospective Population Study	LOLIPOP-IA610-ctrl	SBP	864	138.575	19.808	136	94	205		682	144.145	21.589	142	96	226		1546	137.129	21.3269	135	84	238
		DBP	864	86.8646	10.9259	86	60	133		682	89.6466	11.5772	89	55	129		1546	85.404	11.5522	85	51	170
		MAP	864	104.096	13.0829	103	73	152		682	107.815	14.0028	107	69	157		1546	102.642	13.9899	102	65	193
		PP	864	51.7107	13.2785	49	21	112		682	54.4985	14.7991	52	20	114		1546	51.7251	14.2162	49	19	145
London Life Sciences Prospective Population Study	LOLIPOP-IAP	SBP	132	142.939	21.7392	140	103	212		134	146.873	22.1028	145	103	204		266	140.9	22.1786	139	95	282
		DBP	132	89.8864	13.0353	89	67	130		134	91.5298	13.1124	91	66	131		266	87.7006	13.0618	86	59	143
		MAP	132	107.599	15.253	106.5	80	154		134	110.015	15.419	109.5	78	151		266	105.451	15.4491	104	71	189
		PP	132	53.053	13.0748	51	31	100		134	55.3433	13.3113	54	26	108		266	53.1996	13.2673	51	26	139
London Life Sciences Prospective Population Study	LOLIPOP-OmniEE	SBP	166	134.428	20.4009	133.5	102	244		96	141.948	21.4713	140.5	107	202		262	132.772	21.3277	130	85	244
		DBP	166	85.3494	12.4525	85	53	149		96	90.625	13.616	89	66	135		262	83.5668	12.383	82	52	149
		MAP	166	101.651	14.4486	102	70	181		96	107.75	15.6346	106	80	157		262	99.9644	14.6417	98.5	65	181
		PP	166	49.1205	12.2765	46.5	29	96		96	51.3229	12.1009	49.5	27	93		262	49.2016	13.2776	47	22	118
Ragama Health Study	RHS	SBP
		DBP
		MAP
		PP
Shanghai Men's/Women's Health Study	SMHS/SWHS	SBP	73	134.973	21.1791	130	98	179		208	135.216	20.5074	130	80	195		281	135.153	20.6462	130	80	195
		DBP	73	86.2397	11.1742	87	57.5	116		208	86.5384	12.2312	84	60	120		281	86.4608	11.9467	84	57.5	120
		MAP	73	102.484	13.8368	102	71	137		208	102.764	14.3356	100	66.6667	145		281	102.692	14.1838	100	66.6666	145
		PP	73	48.7329	13.6331	45	25	87		208	48.6778	12.4433	48	20	85		281	48.6922	12.7382	46	20	87
Hispanic Ancestry
Study Name	Cohort Name	Traits	LHD=0							LHD=1							All subjects with LHD
			N	Mean	SD	Median	Min.	Max.		N	Mean	SD	Median	Min.	Max.		N	Mean	SD	Median	Min.	Max.
Insulin Resistance Atherosclerosis Study	IRASC	SBP	71	120.5	19.4	116	92	172		17	117.3	16.9	113	98	164		88	119.9	18.9	115	92	172
		DBP	71	79.5	10.4	78	61	110		17	78.5	11.9	75	64	117		88	79.3	10.6	77.5	61	117
		MAP	71	93.2	12.8	89	71.3	128.3		17	91.5	13.3	87.7	75.3	132.7		88	92.8	12.9	89	71.3	132.7
		PP	71	41	12.2	39	20	80		17	38.8	8.1	38	27	53		88	40.6	11.5	39	20	80
Insulin Resistance Atherosclerosis Study	IRASFS	SBP	340	114.1	13.8869	112	82	158		107	120.626	17.0142	117	90	175		447	115.662	14.9383	113	82	175
		DBP	340	75.0441	9.5532	74	50	100		107	77.7897	10.6024	79	56	108		447	75.7013	9.87221	75	50	108
		MAP	340	87.4745	9.48488	86.3333	63.3333	117.333		107	91.5078	11.562	91	68.3333	130		447	88.44	10.1548	87	63.3333	130
		PP	340	39.0559	9.83971	37	19	82		107	42.8364	10.526	41	22	80		447	39.9609	10.1258	38	19	82
Hispanic Community Health Study / Study of Latinos	HCHS/SOL	SBP
		DBP
		MAP
		PP
Abreviations: SBP, Systolic Blood Pressure (BP); DBP, Diastolic BP; MAP, Mean Arterial Pressure; PP, Pulse Pressure; N, Number of subjects; Mean, mean levels; SD, standard deviation of mean; Median, median of values; Min, minimum value; Max, maximum value.
