# Supplementary material for: Novel genetic associations for blood pressure identified via gene-alcohol interaction in up to 570K individuals across multiple ancestries
Source: PLoS One. 2018 Jun 18;13(6):e0198166. doi: 10.1371/journal.pone.0198166 (PMC6005576; doi:10.1371/journal.pone.0198166)
Supplement: S7 Table — N, Number of subjects; % Hypertensive, defined whether participants presented: (i) SBP ≥ 140 mm Hg, (ii) DBP ≥ 90 mm Hg, and/or (iii) taking anti-hypertensive medication; Mean, age mean; SD, standard deviation of mean; Min, minimum age; Max, maximum age. (XLSX) [file pone.0198166.s027.xlsx]

## Sheet: S7 Table.Demographic Statistics
Table S7. Demographic statistics for replication data (Stage 2). N, Number of subjects; % Hypertensive, % Subjects using anti-hypertensive medications; Age, descriptive of age
European Ancestry
Cohort Name	N	% Male	% Hypertensive	% Subjects using anti-hypertensive Medications	Age
					Mean	SD	Min	Max
ASCOT-SC	2468	73.14	100	69.33	60.98	8.75	40	80
ASCOT-UK	3770	82.28	100	91.78	63.69	8.1	40	80
BRIGHT	1948	39.78	100	100	56.92	11.12	21	80
CoLaus	5408	47	26	18	53.43	10.75	34.9	75.4
DESIR	696	40.3736	4.5911	0	53.5	5.6566	45	65
DHS	940	46.38	85.43	71.28	61.4597	9.09919	33.54	79.86
DR's EXTRA	1230	47	78	42	66.4767	5.37558	57.36	78.7
EGCUT-OmniExpress	5879	45	46	31	48.18	18.2153	18	80
EGCUT-CoreExome	4877	33.24	24	11.67	35.4	12.9915	18	80
EGCUT-Human370CNV	1828	47.43	36	19.42	40.3	16.1638	18	80
EPIC	20528	53.31	44.9	18.17	59.1126	9.27834	39.4935	79.0801
Fenland-GWAS	1350	43.8	20.67	6.78	45.02	7.26	29.4	57.6
Fenland-OMICS	8526	47.37	20.4	8.24	48.86	7.35	30.5	64
FUSION CASE	713	55.54	86.4	67.72	63.5965	7.23151	40.7726	79.2082
FUSION CONTROL	258	28.68	66.67	30.08	63.3997	7.29491	42.6027	79.8795
GeneSTAR	743	43.6	36.6	27.05	52.37	11.96	25	80
GLACIER	6020	39.39	35.23	8.903	49.45	8.58	29.3	64.2
GRAPHIC	1009	50	43.66	12.77	52.8315	4.3969	40	60
HRS	8378	43.32	52.23	46.36	64.5837	9.04909	30	80
INGI-CARL	436	62	23	23	49.48	16.22	18.09	79.79
INGI-FVG	979	58	24	24	51.33	15.33	18.05	79.92
InterAct-CoreExome CASES	4003	50.61	70.9	27.8	56.3	6.67	26.19	75.58
InterAct-CoreExome SUBCOHORT	6435	39.74	43.42	13.3	53.33	8.84	20.18	76.91
InterAct-GWAS CASES	2811	43.51	66.6	28.78	55.52	8.035	29.52	76.46
InterAct-GWAS CASES	3206	33.84	41.1	13.29	52.26	9.64	21.06	74.62
KORA S3	3095	48.5	34.47	12.67	47.32	12.96	24	75
KORA S4	3788	48.94	34.82	17.99	49.17	13.86	24	75
LBC1921	512	41.41	90.23	40.43	79.05	0.57	77.74	80.56
LBC1936	995	50.85	80.2	39.8	69.56	0.84	67.61	71.3
LifeLines	13076	41.66	31.08	14.35	47.7	11.01	18	80
LLFS	3141	44.54	52.69	34.13	61.2846	8.74048	24	80
LOLIPOP-EW610	927	73.14	45.31	19.96	55.96	9.8	35.09	75.01
LOLIPOP-EWA	582	86.94	56.19	31.62	54.38	10.38	22.68	74.98
LOLIPOP-EWP	644	100	58.07	33.07	55.7	9.08	32.38	67.33
METSIM	8508	100	67.63	38.96	57.504	7.009	45	74
NESDA	2539	33.71	41.23	14.85	42.24	12.99	18	65
PREVEND	3627	51.48	33.33	12.41	49.6308	12.4746	28	75
OBA	668	21.1078	42.003	40.9567	44.2171	11.7079	18	77
PROCARDIS	3044	84.49	88.6	75.89	61.36	7.44	35	80
SHEEP-CONTROLS	1523	67.50	52.3	17.3	59.85	7.11	45	70
SHEEP-CASES	1152	70.5	46.3	30	59.27	7.17	45	70
SHIP-0	3771	49.01	40.02	24.87	49.1565	16.1994	20	80
SHIP-Trend	977	44.01	39.51	27.64	50.0849	13.6946	20	80
TRAILS	1264	47.71	5.48	0	16.2	0.64	14.69	18.01
TwinGene	5254	48.06	64	23.09	63.56	7.48	47	80
UK Biobank	125113	49.3442	54.3125	20.7053	56.73	7.94154	39	73
African Ancestry
Cohort Name	N	% Male	% Hypertensive	% Using Anti-Hypertensive Meds	Age
					Mean	SD	Min.	Max.
AADHS	577	43.3	83	83	56.1	9.5	33	79
GeneSTAR	529	35.92	54.63	42.16	50.65	11.91	25	77
HRS	2001	37.73	69.77	62.82	61.5652	8.90235	28	80
Loyola-GXE	612	23.04	23.2	0	40.0779	8.27651	24.6379	77.5332
Loyola-SPT	904	38.83	31.53	13.61	46.5075	13.8087	24.3833	75.7618
HyperGEN-AXIOM	418	45.69	62.2	56.7	48.35	12.26	18	76
Asian Ancestry
Cohort Name	N	% Male	% Hypertensive	% Using Anti-Hypertensive Meds	Age
					Mean	SD	Min.	Max.
BBJ	121247	54.83	52.3	34.48	61.74	12.66	20	80
BES-610	569	34.09	55.54	39.37	62.14	8	50	80
BES-omniexpress	528	40.34	53.03	44.32	64.9	8.9	50	80
CAGE	951	62.9863	14.4059	11.5668	53.05	12.9543	21	80
DF-TJ	1408	22.3	53.48	32.03	63.5	7.68415	35	80
LOLIPOP-IA317	2059	100	46.43	24.09	48.25	10.46	35.03	74.86
LOLIPOP-IA610-case	2789	81.82	78.16	66.44	59.31	9.69	26.66	80.18
LOLIPOP-IA610-ctrl	3757	86.13	50.65	26.27	52.45	10.23	22	74.99
LOLIPOP-IAP	501	100	56.09	27.54	51.08	8.35	31.25	65.95
LOLIPOP-OmniEE	898	53.56	42.76	25.61	49.64	9.91	23.7	76.4
RHS	2474	45.2708	26.6775	20.2102	52.53	7.86381	30	77
SMHS/SWHS	3862	23.1	36.25	26.44	57.16	9.43	40	75
Hispanic Ancestry
Cohort Name	N	% Male	% Hypertensive	% Using Anti-Hypertensive Meds	Age
					Mean	SD	Min.	Max.
IRASC	184	40.77	28.2609	25	53.9185	8.20295	40	69
IRASFS	801	38.4519	11.4563	7.96117	40.8175	13.2935	18.0041	79.8987
HCHS/SOL	12392	40.8974	28.0019	16.8415	46.1394	13.8575	18	76
Abreviations: N, Number of subjects; % Hypertensive, defined whether participants presented: (i) SBP ≥ 140 mm Hg, (ii) DBP ≥ 90 mm Hg, and/or (iii) taking anti-hypertensive medication; Mean, age mean; SD, standard deviation of mean; Min, minimum age; Max, maximum age.
