# Supplementary material for: Novel genetic associations for blood pressure identified via gene-alcohol interaction in up to 570K individuals across multiple ancestries
Source: PLoS One. 2018 Jun 18;13(6):e0198166. doi: 10.1371/journal.pone.0198166 (PMC6005576; doi:10.1371/journal.pone.0198166)
Supplement: S8 Table — Study design, population-based or cohort-unrelated; Principal components used; Other covariates entered in the model; Genotyping platforms; Genotyping calling algorithm; Imputation reference panel; NCBI dbSNP build; Analysis software; Robust or model-based statistics; Family studies: Method of handling relatedness. (XLSX) [file pone.0198166.s028.xlsx]

## Sheet: S8 Table. Pheno & Genotype
S8 Table. Characteristics of each study and their genotype data for replication data (Stage 2)
European Ancestry
Cohort Name	Study Design	Principal Components (PC)	Other Covariates	Genotyping Platforms	Genotyping Calling Algorithm	Imputation Software	Imputation Reference Panel	NCBI dbSNP build	Analysis Software	Robust or model-based statistics	Family Studies: Method of handling relatedness
ASCOT-SC	Cohort-Unrelated	PC1-10	na	Illumina Human Omni Exome Express v8.1	Beadstudio	MaCH/minimac	1000G Phase 1 Integrated Release Version 3 Haplotypes	b37	ProbABEL	Robust	na
ASCOT-UK	Cohort-Unrelated	PC1-10	na	Illumina Human Omni Exome Express v8.1	Beadstudio	MaCH/minimac	1000G Phase 1 Integrated Release Version 3 Haplotypes	b37	ProbABEL	Robust	na
BRIGHT	Cohort-Unrelated (hypertensive cases)	PC1-10	na	Affymetrix GeneChip 500k array	CHIAMO	MaCH/minimac	Dec 2013 1000G v3 release	b37	ProbABEL	Robust	na
CoLaus	Cohort-Unrelated	genotype 1 to 4	na	Affimetrix Human Mapping 500K	BRLMM	minimac	1000G march 2012 v3 ALL	GRCH37/hg19	in-house	Robust	na
DESIR	Cohort-Unrelated	5	na	Illumina	Genome Studio	ShapeIt / Impute2	1000G Phase 1 Integrated Release Version 3 Haplotypes (2010-11 data freeze, 2012-03-14 haplotypes) on 1,092 individuals of all ethnic backgrounds	hg19/b37	R	Robust
DHS	Family-Based	0	Diabetes Status	Affymetrix 5.0	BRLLM-P	IMPUTE2	1000G Phase 1 Integrated Release Version 2 on 1,092 individuals from African, Asia, Europe and the Americas	Build 37	GWAF	Model-based	Kinship
DR's EXTRA	Cohort-Unrelated	PC1	na	Cardio-Metabo_Chip_11395247_A	BeadStudio version 3.3.7, Gentrain version 1.0			hg19	probABEL	Robust
EGCUT	Cohort-Unrelated	4	na	Illumina OmniExpress; Illumina Infinium CoreExome-24; Illumina HumanCNV370	GenomeStudio	Impute2 converted to MACH format	1000G Phase 1 Integrated Release Version 3 Haplotypes (2010-11 data freeze, 2012-03-14 haplotypes) on 1,092 individuals of all ethnic backgrounds and excludes monomorphic and singleton sites	hg19/b37	ProbABEL/R	Robust	na
EPIC	Cohort-Unrelated	2016-04-01	age, sex	Affymetrix BioBank Axiom	Axiom GT1	IMPUTE	1000G Phase 3 associated with IMPUTE	hg19/b37	QUICKTEST	Robust	na
Fenland-GWAS	Cohort-Unrelated	PC1-PC4	na	AFFymetrix SNP5.0	BRLMM	IMPUTE2	1,000G Phase I integrated variant set release (v3), Mar 2012	B37	QUICKTEST	Robust	na
Fenland-OMICS	Cohort-Unrelated	PC1-PC4	na	Affymetrix Axiom UKBiobank	Axiom GT1	IMPUTE2	1,000G Phase 3 integrated variant set release, 2014	B37	QUICKTEST	Robust	na
FUSION CASE	Case-Control	5	age, sex	Illumina HumanHap300	GenCall	MaCH/minimac	1000G Phase 1 Integrated Release Version 3 Haplotypes (2010-11 data freeze, 2012-03-14 haplotypes) on 1,092 individuals of all ethnic backgrounds and excludes monomorphic and singleton sites	b37	ProbABEL	Robust	na
FUSION CONTROL	Case-Control	5	age, sex	Illumina HumanHap300	GenCall	MaCH/minimac	1000G Phase 1 Integrated Release Version 3 Haplotypes (2010-11 data freeze, 2012-03-14 haplotypes) on 1,092 individuals of all ethnic backgrounds and excludes monomorphic and singleton sites	b37	ProbABEL	Robust	na
GeneSTAR	Family-Based	PC1, PC2, PC8, PC10	na	Illumina 1M_v1C	BeadStudio	IMPUTE2	1000G Phase 1 released March 2012, cosmopolitan reference	hg19/b37	MMAP	Robust	Kinship
GLACIER	Cohort-Unrelated	4	na	Illumina CardioMetaboCHip	Illuminus	-	-	b36	QUICKTEST	Robust	-
GRAPHIC	Cohort-Unrelated	0	na	HumanOmniExpress-12v1 array	Illumina	IMPUTE2	1000g V3 March 2012	hg19	R/3.2.4, STATA, SNPTEST	Model based	na
HRS	Cohort-Unrelated	4	na	Illumina Omni2.5 Beadchip	SHAPEIT2	IMPUTE2	Imputation to 1000G Phase I v3 (released March 2012). The worldwide reference panel of all 1,092 samples from the phase I integrated variant set was used	b37	ProbABEL	Robust	na
INGI-CARL	Family-Based	0	na	Illumina 370	GenomeStudio Illumina	IMPUTE2	1000G Phase 1 Integrated Release Version 3 Haplotypes	hg19/b37	ProbABEL	Robust
INGI-FVG	Family-Based	NA	village	Illumina 370K	GenomeStudio Illumina	IMPUTE2	1000G Phase 1 Integrated Release Version 3 Haplotypes	hg19/b37	ProbABEL	Robust	Kinship
InterAct-CoreExome CASES	Case-Cohort	PC1-PC4	na	Illumina Human CoreExome-12v1 & 24v1	Illuminus	IMPUTE2	Haplotype Reference Consortium (HRC) .r1	B37	QUICKTEST	Robust	na
InterAct-CoreExome SUBCOHORT	Case-Cohort	PC1-PC4	na	Illumina Human CoreExome-12v1 & 24v1	Illuminus	IMPUTE2	Haplotype Reference Consortium (HRC) .r1	B37	QUICKTEST	Robust	na
InterAct-GWAS CASES	Case-Cohort	PC1-PC4	na	Illumina 660w quad chip	Illuminus	IMPUTE2	Haplotype Reference Consortium (HRC) .r1	B37	QUICKTEST	Robust	na
InterAct-GWAS SUBCOHORT	Case-Cohort	PC1-PC4	na	Illumina 660w quad chip	Illuminus	IMPUTE2	Haplotype Reference Consortium (HRC) .r1	B37	QUICKTEST	Robust	na
KORA S3	Cohort-Unrelated	0	na	Illumina Omni 2.5/Illumina Omni Express	Genome Studio	IMPUTE v2.3.0	1000g phase1 integrated haplotypes (produced using SHAPEIT2) (ALL.integrated_phase1_SHAPEIT_16-06-14.nosing.tgz)	NCBI build 37	Snptest	model	\
KORA S4	Cohort-Unrelated	0	na	Affymetrix Axiom	Affymetrix software	IMPUTE v2.3.0	1000g phase1 integrated haplotypes (produced using SHAPEIT2) (ALL.integrated_phase1_SHAPEIT_16-06-14.nosing.tgz)	NCBI build 37	Snptest	model	\
LBC1921	Cohort-Unrelated	4	na	Illumian 610-Quadv1	Genome studio	minimac	1000G version 3, cosmopolitan	build 37	ProbABEL	Robust	na
LBC1936	Cohort-Unrelated	4	na	Illumian 610-Quadv1	Genome studio	minimac	1000G version 3, cosmopolitan	build 37	ProbABEL	Robust	na
LifeLines	Cohort-Unrelated	10	na	Illumina Cyto SNP12 v2	Illumina GenomeStudio	Minimac	1000 Genomes Phase1 v3 reference panel (March 2012)	hg19/b37	Quicktest v0.95	Robust
LLFS	Family-Based	1	FC1 – FC3	Illumina, Omni 2.5	GenomeStudio version 2010.2, Genotyping Module version 1.7.4, GenTrain version 1.0	MACH and MINIMAC	1000G Phase 1 Integrated Release Version 3 Haplotypes (2010-11 data freeze, 2012-03-14 haplotypes) on 4,667 subjects of all ethnic backgrounds. SNPs were excluded if had: (i) MAF <1% or >99%, (ii) Hardy-Weinberg equilibrium p value <1E-06, (iii) allelic mismatch with 1000HG, or (iv) was not present in 1000 HG	hg19/b37	MMAP	Robust	Kinship
LOLIPOP-EW610	Cohort-Unrelated	PCs1-5	Age and gender	Illumina Human610	BeadStudio	IMPUTE2	1000G Phase 1 Integrated Release Version 3 Haplotypes (March 2012) on 1,092 individuals of all ethnic backgrounds	hg19/b37	ProbABEL	Robust	na
LOLIPOP-EWA	Cohort-Unrelated	PCs1-5	Age and gender	Affymetrix 500K	BRLMM	IMPUTE2	1000G Phase 1 Integrated Release Version 3 Haplotypes (March 2012) on 1,092 individuals of all ethnic backgrounds	hg19/b37	ProbABEL	Robust	na
LOLIPOP-EWP	Cohort-Unrelated	PCs1-5	Age	Perlegen custom	Perlegen	IMPUTE2	1000G Phase 1 Integrated Release Version 3 Haplotypes (March 2012) on 1,092 individuals of all ethnic backgrounds	hg19/b37	ProbABEL	Robust	na
METSIM	Cohort-Unrelated	5	na	Illumina OmniExpress	GenCall	MaCH/minimac	1000G Phase 1 Integrated Release Version 3 Haplotypes (2010-11 data freeze, 2012-03-14 haplotypes) on 1,092 individuals of all ethnic backgrounds and excludes monomorphic and singleton sites	b37	ProbABEL	Robust	na
NESDA	Cohort-Unrelated	3	na	Perlegen-Affymetrix 5.0; Affymetrix 6.0 907K	Birdseed	Minimac	1000Genomes global panel phase 1 release v3	b37	Quicktest v0.95	Robust
PREVEND	Cohort-Unrelated	1	na	Illumina HumanCyto SNP	Beadstudio Genecall	Shapeit v2.11+Impute2	March 2012 (v3) 1000G reference panel	hg19/b37	MMAP	Robust
OBA - French obese cases	Cohort-Unrelated	5	Region (instead of FieldCentre)	Illumina Human CNV370-Duo	GenomeStudio	ShapeIt - Impute2	1000G Phase 1 Integrated Release Version 3 Haplotypes on 1,092 individuals of all ethnic backgrounds	hg19/b37	R	Robust
PROCARDIS	Case-Control	0	Study, Country of origin	Illumina 1M+610K	Beadstudio	MaCH/minimac	1000G Phase 1 Integrated Release Version 3 Haplotypes (2010-11 data freeze, 2012-03-14 haplotypes) on 1,092 individuals of all ethnic backgrounds and excludes monomorphic and singleton sites	hg19/b36	STATA	Robust	Familial clustering was accounted for by using robust sandwich estimation of variance using STATA v10.
SHEEP	Case-Control	0	na	na	na	na	na	na	PLINK	model based	na
SHIP-0	Cohort-Unrelated	10	na	Affymetrix Genome-wide Human SNP Array 6.0	Birdseed2	IMPUTE v2.2.2	Mar 2012 V3 1000G	hg19/b37	ProbABEL 0.4.3	Robust	na
SHIP-Trend	Cohort-Unrelated	10	na	Illumina HumanOmni2.5 BeadChip	GenomeStudio Genotyping Module v1.0 (GenCall)	IMPUTE v2.2.2	Mar 2012 V3 1000G	hg19/b37	ProbABEL 0.4.3	Robust	na
TRAILS	Cohort-Unrelated	10	na	Illumina Cyto SNP12 v2	Illumina GenomeStudio	Impute v2.2.2	1000G phase 1 integrated v3 (March 2012)	hg19/b37	Quicktest v0.95	Robust
TwinGene	Family-Based	PC 1-4	Age, Sex	Illumina OmniExpress bead chip	Genomestudio v2010.3	MaCH/minimac	1000G data freeze: 2010-11-23 1000G Phase 1 version 3 genotype release: 2011-05-21 Mach with monomorphic removed release: 2012-03-14	build 37	ProbABEL v 0.4.4	Robust	Remove the relatedness (based on genomic relationship matrix from GCTA, cutoff Fst 0.025)
UK Biobank	Cohort-Unrelated	01:10:00	UK Biobank Axiom vs. UK BiLEVE array	Affymetrix Axiom	Affymetrix Power Tools software and the Affymetrix Best Practices Workflow (Affymetrix, “Axiom® Genotyping Solution Data Analysis Guide”, 2014. http://media.affymetrix.com/support/downloads/manuals/axiom_genotyping_solution_analysi s_guide.pdf)	SHAPEIT3/IMPUTE2	UK10K haplotype reference panel was merged together with the 1000 Genomes Phase 3 reference panel	hg19/b36	QUICKTEST	--method-interaction; --method robust	na
African Ancestry
Cohort Name	Study Design	Principal Components (PC)	Other Covariates	Genotyping Platforms	Genotyping Calling Algorithm	Imputation Software	Imputation Reference Panel	NCBI dbSNP build	Analysis Software	Robust or model-based statistics	Family Studies: Method of handling relatedness
AADHS	Case-Control	admixture estimation instead of PC	na	Illumina Omni5 array	GenomeStudio	IMPUTE2	Perform each analysis using imputation from the 1000G Phase I Integrated Release Version 3 [MARCH 2012].	Build 37 (hg19)	sas proc reg	sas covb option	na
GeneSTAR	Family-Based	PC1, PC2	na	Illumina 1M_v1C	BeadStudio	IMPUTE2	1000G Phase 1 released March 2012, cosmopolitan reference	hg19/b37	MMAP	Robust	Kinship
HRS	Cohort-Unrelated	4	na	Illumina Omni2.5 Beadchip	SHAPEIT2	IMPUTE2	Imputation to 1000G Phase I v3 (released March 2012). The worldwide reference panel of all 1,092 samples from the phase I integrated variant set was used	b37	ProbABEL	Robust	na
Loyola-GXE	Cohort-Unrelated	PC1, PC2, PC3	na	Illumina Metabochip	GeneCall	MaCH/minimac	1000G Phase 1 Integrated Release Version 3 Haplotypes (2010-11 data freeze, 2012-03-14 haplotypes) on 1,092 individuals of all ethnic backgrounds and excludes monomorphic and singleton sites	hg19/b36	ProbABEL	Robust	na
Loyola-SPT	Cohort-Unrelated	PC1, PC2, PC3	na	Illumina Metabochip	GeneCall	MaCH/minimac	1000G Phase 1 Integrated Release Version 3 Haplotypes (2010-11 data freeze, 2012-03-14 haplotypes) on 1,092 individuals of all ethnic backgrounds and excludes monomorphic and singleton sites	hg19/b36	ProbABEL	Robust	na
HyperGEN-AXIOM	Family-Based	3	na	Affymetrix Axiom	Affymetrix Genotyping Console	MACH-ADMIX	1000G Phase 1 Integrated Release Version 3 Haplotypes (2010-11 data freeze, 2012-03-14 haplotypes) on 1,092 individuals of all ethnic backgrounds and excludes monomorphic and singleton sites	hg19/b36	ProbABEL	Robust	Kinship
Asian Ancestry
Cohort Name	Study Design	Principal Components (PC)	Other Covariates	Genotyping Platforms	Genotyping Calling Algorithm	Imputation Software	Imputation Reference Panel	NCBI dbSNP build	Analysis Software	Robust or model-based statistics	Family Studies: Method of handling relatedness
BBJ	Cohort-Unrelated	10	46 (Affection status at registry)	Illumina) HumanOmniExpressExome OR HumanOmniExpress + HumanExome	GenCall	MaCH/minimac	1000G Phase 1 Integrated Release Version 3 Haplotypes (2010-11 data freeze, 2012-03-14 haplotypes) on 275 individuals of EAS backgrounds after excluding relatives using IBS Sites with MAF < 0.01 and pHWE<1.0e-06 or indels are excluded	hg19/b37	ProbABEL	Robust	na
BES-610	Cohort-Unrelated	NA	na	Illumina Human610-Quad Beadchips	Illumina GenomeStudio GenCall	MaCH (UM imputation server)	1000 Genomes Phase 1 v3 (cosmopolitan panel)	b37	ProbABEL	Robust	na
BES-omniexpress	Cohort-Unrelated	NA	na	Illumina OmniExpress	Illumina GenomeStudio GenCall	MaCH (UM imputation server)	1000 Genomes Phase 1 v3 (cosmopolitan panel)	b37	ProbABEL	Robust	na
CAGE	Cohort-Unrelated	0	na	illumina 550K / Omni2.5M	Beadstudio	SHAPEIT/minimac3	1000G phase3v5 (http://genome.sph.umich.edu/wiki/Minimac3#Reference_Panels_for_Download) 2504 individuals of all ancestry	b37	sandwich package of R	Robust	na
DF-TJ	Cohort-Unrelated	0	na	Affymetrix 6.0	BRLMM	Mach/minimac	1000G PhaseI v3 Shapeit2 Reference/(2010-11 data freeze, 2013-09 haplotypes)	hg19	ProABEL	Robust
LOLIPOP-IA317	Cohort-Unrelated	PCs1-5	Age	Illumina Hap300K	BeadStudio	IMPUTE2	1000G Phase 1 Integrated Release Version 3 Haplotypes (March 2012) on 1,092 individuals of all ethnic backgrounds	hg19/b37	ProbABEL	Robust	na
LOLIPOP-IA610-case	Case-Control	PCs1-5	Age, gender and cohort	Illumina Human610	BeadStudio	IMPUTE2	1000G Phase 1 Integrated Release Version 3 Haplotypes (March 2012) on 1,092 individuals of all ethnic backgrounds	hg19/b37	ProbABEL	Robust	na
LOLIPOP-IA610-ctrl	Case-Control	PCs1-5	Age, gender and cohort	Illumina Human610	BeadStudio	IMPUTE2	1000G Phase 1 Integrated Release Version 3 Haplotypes (March 2012) on 1,092 individuals of all ethnic backgrounds	hg19/b37	ProbABEL	Robust	na
LOLIPOP-IAP	Cohort-Unrelated	PCs1-5	Age	Perlegen custom	Perlegen	IMPUTE2	1000G Phase 1 Integrated Release Version 3 Haplotypes (March 2012) on 1,092 individuals of all ethnic backgrounds	hg19/b37	ProbABEL	Robust	na
LOLIPOP-OmniEE	Cohort-Unrelated	PCs1-5	Age and gender	Illumina OmniExpressExome Chip	BeadStudio	IMPUTE2	1000G Phase 1 Integrated Release Version 3 Haplotypes (March 2012) on 1,092 individuals of all ethnic backgrounds	hg19/b37	ProbABEL	Robust	na
RHS	Cohort-Unrelated	10	na	illumina 550K / Omni2.5M	Beadstudio	Beagle version 4 (r1399)	1000G phase3 shapeit2_phased (ftp://ftp.1000genomes.ebi.ac.uk/vol1/ftp/release/20130502/) 489 individuals of South Asian ancestry (SAS = BEB GIH ITU PJL STU)	b37	sandwich package of R	Robust	na
SMHS/SWHS	Cohort-Unrelated	0	Age, Sex, Genotyping platforms, Use of anti-hypertensive meds	Affymetrix 6.0, Illumina Omni Express, Illumina 550, Illumina 1M	Birdsuite/GenomeStudio	MaCH/minimac	1000G Phase 3 Integrated Release Version 5	hg19/b37	R	Robust	na
Hispanic Ancestry
Cohort Name	Study Design	Principal Components (PC)	Other Covariates	Genotyping Platforms	Genotyping Calling Algorithm	Imputation Software	Imputation Reference Panel	NCBI dbSNP build	Analysis Software	Robust or model-based statistics	Family Studies: Method of handling relatedness
IRASC	Cohort-Unrelated	Admixture estimates (admix) 2,3,4	na	Illumina OmniExpress+1S	Bead Studio	IMPUTE2	1000G Phase 1 Integrated Release Version 3 Haplotypes (2010-11 data freeze, 2012-03-14 haplotypes) on 1,092 individuals of all ethnic backgrounds and excludes monomorphic and singleton sites	hg19/b36	GWAF	non-robust	na
IRASFS	Family-Based	Admixture estimates (admix) 2,3,4	recruiting center	Illumina OmniExpress+1S	Bead Studio	IMPUTE2	1000G Phase 1 Integrated Release Version 3 Haplotypes (2010-11 data freeze, 2012-03-14 haplotypes) on 1,092 individuals of all ethnic backgrounds and excludes monomorphic and singleton sites	hg19/b36	GWAF	non-robust	kinship
HCHS/SOL	Family-Based	1 to 5	genetic subgroup (6 levels), heterogeneous residual variance by genetic subgroup, kinship, shared household, block group, sampling weight	Omni 2.5M + custom array, Omni 2M Supplemental array, CardioMetabochip array	Illumina GenomeStudio	SHAPEIT2 and IMPUTE2	1000G Phase 3	hg19	GENESIS	model-based	Kinship
Study design, population-based or cohort-unrelated; Principal components used; Other covariates entered in the model; Genotyping platforms; Genotyping calling algorithm; Imputation reference panel; NCBI dbSNP build; Analysis software; Robust or model-based statistics; Family studies: Method of handling relatedness
