# Supplementary material for: Novel genetic associations for blood pressure identified via gene-alcohol interaction in up to 570K individuals across multiple ancestries
Source: PLoS One. 2018 Jun 18;13(6):e0198166. doi: 10.1371/journal.pone.0198166 (PMC6005576; doi:10.1371/journal.pone.0198166)
Supplement: S9 Table — Top significant associated SNVs are shown per gene for each trait and alcohol exposure. (XLSX) [file pone.0198166.s029.xlsx]

## Sheet: Sheet1
S9 Table. Novel SNVs/ genes associated with BP traits in multi-ancestry and specific-ancestry meta-combined results
											Stage 1 and Stage 2
Ancestry	SNV	Chr	Position	Gene	Closest Gene	Role	A1/A2	Freq1	Trait	Drink	b_M(S.E.)	b_Int(S.E.)	P-Value	N	Het-P value
Multi	rs10092965	8	8515975	LOC105379224	SGK223		A/G	0.53	DBP	CURD	-0.19(0.05)	0.01(0.06)	1.74e-12	373915	0.107
EA								0.54			-0.16(0.06)	-0.02(0.06)	9.12E-11	356488
HA								0.41			-0.46(0.17)	0.04(0.23)	0.00204	17427
Multi	rs7823056	8	8525195	LOC105379224	SGK223		A/G	0.5	PP	LHD	-0.31(0.05)	0.10(0.09)	3.31e-11	161080	0.283
AA								0.4435			-0.59(0.24)	-0.24(0.64)	0.0186	7827
EA								0.4984			-0.3(0.05)	0.1(0.09)	5.13e-10	153253
Multi	rs7823056	8	8525195	LOC105379224	SGK223		A/G	0.41	SBP	LHD	-0.44(0.07)	0.11(0.12)	1.38e-11	214814	0.351
AA								0.4435			-0.71(0.32)	0.33(0.85)	0.0776	7827
EA								0.4984			-0.44(0.08)	0.03(0.13)	3.24e-11	153255
Multi	rs453301	8	9172877	LOC102724880	PPP1R3B		T/G	0.5	DBP	CURD	-0.13(0.06)	-0.07(0.06)	4.9e-12	365537	0.179
EA								0.5038			-0.12(0.06)	-0.07(0.07)	1.12e-10	348110
HA								0.343			-0.26(0.18)	-0.25(0.25)	0.00759	17427
Multi	rs10503387	8	9293015	LOC157273			T/C	0.37	SBP	CURD	0.32(0.09)	0.03(0.11)	1.07e-14	381431	0.0018
AA								0.1771			0.42(0.34)	-1.17(0.46)	0.0263	24945
EA								0.3784			0.31(0.1)	0.07(0.11)	7.76e-16	356486
Multi	rs11781008	8	9295729	LOC157273			T/G	0.37	DBP	CURD	0.13(0.06)	0.07(0.06)	1.05e-11	373915	0.584
EA								0.3691			0.14(0.06)	0.06(0.07)	7.76e-11	356488
HA								0.3971			0.1(0.17)	0.26(0.23)	0.0813	17427
Multi	rs4383974	8	9761838	TNKS		intron	C/G	0.7	SBP	CURD	-0.28(0.10)	-0.08(0.11)	2.04e-13	381431	0.061
AA								0.7376			-0.9(0.3)	0.77(0.41)	0.00933	24945
EA								0.7025			-0.2(0.11)	-0.17(0.12)	1.18e-12	356486
Multi	rs9286060	8	9795635	TNKS			A/C	0.38	DBP	CURD	0.21(0.06)	-0.02(0.06)	2.29e-13	371053	0.326
AA								0.4698			0.38(0.14)	-0.31(0.21)	0.0288	22943
EA								0.3791			0.18(0.06)	0.01(0.07)	2.57e-12	348110
Multi	rs34919878	8	10241994	MSRA		intron	A/G	0.41	DBP	CURD	-0.18(0.06)	-0.05(0.06)	5.75e-17	365537	0.222
EA								0.4191			-0.16(0.06)	-0.07(0.07)	1.7e-15	348110
HA								0.2455			-0.46(0.2)	0.03(0.27)	0.00741	17427
Multi	rs4841294	8	10247558	MSRA		intron	A/C	0.43	SBP	LHD	-0.40(0.07)	0.01(0.13)	2.69e-10	166956	0.432
AA								0.2543			-0.82(0.33)	0.4(0.83)	0.0389	8756
EA								0.4429			-0.38(0.07)	-0.01(0.13)	2.95e-09	158200
Multi	rs17693945	8	10248500	MSRA		intron	T/C	0.41	MAP	LHD	-0.30(0.05)	0.08(0.09)	1.51e-09	166054	0.16
AA								0.1722			-0.51(0.27)	1.45(0.72)	0.0646	8623
EA								0.4196			-0.29(0.05)	0.06(0.09)	3.8e-09	157431
Multi	rs13276026	8	10752445	LOC102723313	PINX1	intron	A/G	0.55	DBP	CURD	-0.11(0.05)	-0.10(0.06)	4.47e-14	373915	0.434
EA								0.5578			-0.12(0.06)	-0.09(0.06)	5.37e-13	356488
HA								0.4906			-0.07(0.17)	-0.34(0.23)	0.0363	17427
Multi	rs13276026	8	10752445	LOC102723313	PINX1	intron	A/G	0.55	MAP	CURD	-0.15(0.06)	-0.03(0.07)	4.68e-09	373911	0.337
EA								0.5569			-0.16(0.06)	-0.01(0.07)	3.72e-08	356484
HA								0.4906			-0.1(0.17)	-0.32(0.24)	0.0437	17427
Multi	rs13276026	8	10752445	LOC102723313	PINX1	intron	A/G	0.55	SBP	CURD	-0.22(0.09)	-0.24(0.10)	3.89e-23	373919	0.526
EA								0.5578			-0.24(0.1)	-0.21(0.11)	3.98e-22	356486
HA								0.4905			-0.01(0.27)	-0.64(0.37)	0.0447	17433
Multi	rs4551304	8	10807559	PINX1		intron	A/G	0.4	DBP	CURD	0.10(0.06)	0.12(0.06)	1.7e-14	373915	0.436
EA								0.4001			0.1(0.06)	0.12(0.06)	2.88e-13	356488
HA								0.4528			0.15(0.17)	0.28(0.23)	0.0257	17427
Multi	rs4551304	8	10807559	PINX1		intron	A/G	0.4	MAP	CURD	0.15(0.06)	0.03(0.07)	2.24e-08	373911	0.359
EA								0.4			0.15(0.07)	0.02(0.07)	2.24e-07	356484
HA								0.4528			0.17(0.18)	0.24(0.24)	0.0355	17427
Multi	rs9969436	8	10985149	XKR6		intron	T/G	0.47	MAP	LHD	0.28(0.05)	-0.01(0.09)	3.09e-09	165894	0.266
AA								0.1904			0.79(0.32)	-0.39(0.82)	0.0407	8463
EA								0.4846			0.27(0.05)	0(0.09)	2.04e-08	157431
Multi	rs2409784	8	11539347	BLK		intron	A/C	0.51	DBP	CURD	-0.11(0.05)	-0.09(0.06)	5.62e-12	374975	0.0703
EA								0.5141			-0.11(0.06)	-0.07(0.06)	1.38e-10	357548
HA								0.3639			-0.1(0.18)	-0.48(0.24)	0.00282	17427
Multi	rs2244894	8	11591150	LINC00208			C/G	0.44	PP	CURD	-0.07(0.06)	-0.19(0.07)	3.24e-15	493402	0.0718
ASA								0.0661			0.21(0.14)	-0.5(0.23)	0.0832	142326
EA								0.594			-0.14(0.07)	-0.11(0.08)	2.69e-15	351076
Multi	rs13249843	8	11601509	LINC00208			T/G	0.33	DBP	CURD	0.18(0.06)	0.04(0.06)	2.51e-15	398330	0.468
EA								0.3396			0.14(0.06)	0.09(0.07)	1.66e-13	356488
HA								0.4788			0.42(0.17)	-0.12(0.23)	0.0132	17427
Multi	rs3735814	8	11749887	GATA4		intron	A/G	0.52	SBP	CURD	0.09(0.09)	0.22(0.10)	2.14e-10	373919	0.521
EA								0.5127			0.07(0.09)	0.23(0.11)	1.26e-09	356486
HA								0.621			0.24(0.28)	0.33(0.38)	0.0813	17433
Multi	rs9928094	16	53765993	FTO		intron	A/G	0.63	PP	CURD	-0.33(0.05)	0.19(0.06)	2.63e-15	499179	0.794
ASA								0.7564			-0.36(0.07)	0.2(0.11)	3.55e-07	150861
EA								0.5708			-0.3(0.07)	0.16(0.08)	5.89e-09	348318
Multi	rs62033406	16	53790314	FTO		intron	A/G	0.55	MAP	CURD	-0.22(0.05)	0.12(0.06)	3.31e-08	511074	0.414
ASA								0.4551			-0.16(0.07)	0.1(0.11)	0.0316	148970
EA								0.582			-0.28(0.07)	0.17(0.07)	4.27e-07	362104
Top significant associated SNVs are shown per gene for each trait and alcohol exposure.
