# Supplementary material for: Novel genetic associations for blood pressure identified via gene-alcohol interaction in up to 570K individuals across multiple ancestries
Source: PLoS One. 2018 Jun 18;13(6):e0198166. doi: 10.1371/journal.pone.0198166 (PMC6005576; doi:10.1371/journal.pone.0198166)
Supplement: S10 Table — Variants previously reported for blood pressure (BP) in genome-wide association studies. The most significant associated SNVs are shown per gene for each Blood Pressure (BP) trait and alcohol status. Abbreviations: Nb, order number based on genes; SNV, single nucleotide variant; Chr, chromosome; Position, Gene, and Role in dbSNP build 150 (hg38) annotation; Role: Intronic, missense, up-stream or downstream, or intergenic (blank space) SNV; Near gene reflects genes at up to +/-500 kb and related to BP / alcohol; A1/2, Coded and non-coded alleles; Frq1, Frequency of coded allele; Trait, SBP: Systolic BP, DBP: Diastolic BP, MAP: Mean Arterial Pressure, PP: Pulse Pressure; Drink: Alcohol consumption, CURD, Current drinker (yes/no), LHD, Light(1–7 drinks/week) or heavy (≥8 drinks/week) drinker; Stage 1, Discovery cohorts; Stage 2, Replication cohorts; Stage 1 & Stage 2, Discovery and Replication combined; b_M(S.E.), beta coefficient of SNV (standard error); b_I(S.E.): SNV*E is SNV-alcohol interaction effect (standard error); P-Value: modified-interaction METAL P-Value; N, Number of subjects; P-Meta, P-Meta, modified-interaction METAL P-Value of Meta-analysis in combined Stage 1 and Stage 2; Het-P value, Heterogeneity P-Value. * These genes were detected also via correlated meta-analysis. (XLSX) [file pone.0198166.s030.xlsx]

## Sheet: S10 Table. EA
S10 Table. SNVs/genes associated with BP traits in European ancestry. Variants previously reported for blood pressure (BP) in genome-wide association studies
											Stage 1				Stage 2				Stage 1 and Stage 2
Nb	SNV	Chr	Position	Gene	Near Gene	Role	A1/2	Frq1	Trait	Drink	b_M(S.E.)	b_I(S.E.)	P-Value	N	b_Main(S.E.)	b_Int(S.E.)	P-Value	N	b_M(S.E.)	b_I(S.E.)	P-Value	N	Het-P value
1	rs17035646	1	10736490	CASZ1*		intron	A/G	0.34	SBP	LHD	0.54(0.12)	0.07(0.26)	4.17e-06	51504	0.55(0.11)	-0.25(0.18)	2.29e-07	102318	0.54(0.08)	-0.16(0.14)	8.91e-13	153822	0.521
1	rs35295665	1	10737371	CASZ1		intron	D/I	0.64	PP	CURD	-0.37(0.11)	0.07(0.13)	6.76e-07	85019	-0.43(0.14)	0.16(0.15)	1.91e-10	178525	-0.39(0.09)	0.12(0.10)	9.12e-17	263544	0.879
1	rs35295665	1	10737371	CASZ1		intron	D/I	0.64	SBP	CURD	-0.61(0.16)	0.03(0.19)	3.8e-10	85019	-0.66(0.22)	0.10(0.23)	8.71e-17	178525	-0.63(0.13)	0.06(0.14)	5.25e-27	263544	0.96
1	rs34071855	1	10738432	CASZ1		intron	C/G	0.64	DBP	CURD	-0.30(0.10)	0.01(0.12)	1.55e-06	85019	-0.34(0.08)	0.04(0.09)	3.63e-20	263247	-0.32(0.07)	0.02(0.07)	2.09e-26	348266	0.938
2	rs12561919	1	11779866	C1orf167*	LOC100506310	missense	T/C	0.14	DBP	CURD	-0.45(0.12)	-0.10(0.15)	9.77e-13	90691	-0.23(0.11)	-0.22(0.12)	3.16e-22	270723	-0.33(0.08)	-0.14(0.09)	1.41e-34	361414	0.257
2	rs12561919	1	11779866	C1orf167	LOC100506310	missense	T/C	0.14	DBP	LHD	-0.54(0.11)	-0.30(0.20)	3.63e-11	47970	-0.42(0.09)	0.11(0.14)	2.29e-07	107143	-0.47(0.07)	-0.00(0.12)	9.55e-17	155113	0.0227
2	rs12561919	1	11779866	C1orf167	LOC100506310	missense	T/C	0.14	MAP	LHD	-0.64(0.12)	-0.41(0.22)	2.88e-13	47970	-0.48(0.10)	0.15(0.16)	3.24e-07	106376	-0.55(0.08)	-0.00(0.13)	3.63e-18	154346	0.00386
2	rs12561919	1	11779866	C1orf167	LOC100506310	missense	T/C	0.14	SBP	CURD	-0.59(0.20)	-0.35(0.23)	4.9e-14	90691	-0.53(0.19)	-0.26(0.21)	2.63e-31	270721	-0.55(0.14)	-0.28(0.15)	1.29e-45	361412	0.575
2	rs12561919	1	11779866	C1orf167	LOC100506310	missense	T/C	0.14	SBP	LHD	-0.85(0.16)	-0.64(0.31)	7.24e-13	47970	-0.59(0.14)	0.14(0.23)	7.41e-06	107145	-0.71(0.11)	-0.07(0.18)	4.07e-16	155115	0.00274
3	rs45553335	1	11798900	MTHFR*		intron	T/C	0.84	PP	CURD	0.20(0.13)	0.25(0.15)	1.15e-07	90691	0.28(0.13)	0.01(0.14)	2.95e-09	261984	0.24(0.09)	0.09(0.10)	7.24e-16	352675	0.212
3	rs45553335	1	11798900	MTHFR		intron	T/C	0.84	SBP	CURD	0.60(0.19)	0.42(0.22)	2.46e-18	90691	0.54(0.18)	0.19(0.20)	1.15e-23	267394	0.57(0.13)	0.25(0.14)	1.1e-41	358085	0.112
3	rs45553335	1	11798900	MTHFR		intron	T/C	0.84	SBP	LHD	0.98(0.15)	0.47(0.29)	8.91e-17	48642	0.51(0.13)	-0.06(0.22)	3.09e-05	107145	0.72(0.10)	0.06(0.17)	1.62e-18	155787	0.000209
3	rs17037390	1	11800786	MTHFR		intron	A/G	0.16	DBP	CURD	-0.44(0.11)	-0.13(0.14)	1.78e-15	90691	-0.27(0.10)	-0.17(0.11)	5.37e-24	271159	-0.34(0.08)	-0.13(0.09)	2.24e-39	361850	0.192
3	rs17037390	1	11800786	MTHFR		intron	A/G	0.16	DBP	LHD	-0.60(0.10)	-0.18(0.19)	8.91e-14	48642	-0.36(0.08)	0.07(0.13)	2.57e-06	107143	-0.46(0.06)	0.02(0.11)	9.12e-18	155785	0.00465
3	rs45603435	1	11801798	MTHFR		intron	A/G	0.84	MAP	LHD	0.73(0.11)	0.28(0.20)	6.46e-17	48642	0.42(0.09)	-0.08(0.15)	1.66e-06	106376	0.55(0.07)	0.00(0.12)	1.62e-20	155018	0.000592
4	rs3753584	1	11804529	CLCN6*		upstream-2KB	T/C	0.84	DBP	LHD	0.60(0.10)	0.21(0.19)	7.41e-14	48642	0.36(0.08)	-0.06(0.14)	1.78e-06	107143	0.46(0.06)	0.00(0.11)	5.13e-18	155785	0.00473
4	rs3753584	1	11804529	CLCN6		upstream-2KB	T/C	0.84	MAP	LHD	0.72(0.11)	0.29(0.20)	8.32e-17	48642	0.42(0.09)	-0.09(0.15)	1.12e-06	106376	0.55(0.07)	0.01(0.12)	1.23e-20	155018	0.000681
4	rs3753584	1	11804529	CLCN6		upstream-2KB	T/C	0.84	PP	CURD	0.22(0.13)	0.22(0.15)	2.69e-07	90691	0.28(0.13)	0.03(0.14)	3.16e-10	261984	0.25(0.09)	0.10(0.10)	1e-16	352675	0.389
4	rs3753584	1	11804529	CLCN6		upstream-2KB	T/C	0.84	SBP	CURD	0.64(0.19)	0.35(0.22)	3.16e-18	90691	0.55(0.18)	0.21(0.20)	8.71e-26	267394	0.59(0.13)	0.24(0.14)	7.41e-44	358085	0.217
4	rs3753584	1	11804529	CLCN6		upstream-2KB	T/C	0.84	SBP	LHD	0.96(0.15)	0.46(0.29)	3.24e-16	48642	0.54(0.13)	-0.05(0.22)	5.5e-06	107145	0.73(0.10)	0.07(0.17)	2.82e-19	155787	0.000851
4	rs6669371	1	11822085	CLCN6		intron	T/G	0.84	DBP	CURD	0.49(0.12)	0.08(0.14)	3.55e-16	90691	0.26(0.10)	0.20(0.11)	1.86e-25	271159	0.36(0.08)	0.12(0.09)	3.8e-41	361850	0.141
5	rs41275508	1	11843992	NPPA-AS1*		nc-transcript	C/G	0.94	SBP	CURD	0.67(0.30)	0.50(0.35)	3.89e-10	88081	0.86(0.30)	-0.02(0.33)	1.82e-12	257173	0.76(0.21)	0.18(0.24)	4.17e-22	345254	0.289
5	rs198358	1	11844019	NPPA-AS1		nc-transcript	T/C	0.76	DBP	CURD	0.23(0.10)	0.10(0.12)	2.51e-07	90691	0.20(0.09)	0.06(0.10)	8.71e-12	280112	0.21(0.07)	0.07(0.07)	1.12e-18	370803	0.562
6	rs5066	1	11845938	NPPA*		utr-3	A/C	0.06	PP	CURD	-0.57(0.20)	0.01(0.23)	6.31e-07	88081	-0.24(0.19)	-0.07(0.21)	0.000145	254531	-0.40(0.14)	0.02(0.15)	3.89e-10	342612	0.111
6	rs55714388	1	11850405	NPPA			A/C	0.91	DBP	CURD	0.73(0.17)	-0.06(0.20)	3.24e-12	89036	0.38(0.14)	-0.04(0.15)	3.09e-10	261287	0.52(0.11)	-0.11(0.12)	1.45e-20	350323	0.00836
6	rs55714388	1	11850405	NPPA			A/C	0.9	MAP	LHD	0.79(0.16)	0.44(0.31)	4.07e-10	45574	0.48(0.12)	-0.24(0.20)	0.000151	101946	0.60(0.10)	-0.08(0.17)	8.13e-12	147520	0.00188
6	rs55714388	1	11850405	NPPA			A/C	0.91	SBP	CURD	1.18(0.27)	-0.04(0.32)	1.41e-13	89036	0.61(0.24)	0.15(0.26)	3.8e-15	261285	0.87(0.18)	-0.01(0.20)	1.15e-27	350321	0.0453
7	rs6668659	1	11862241	NPPB*			T/G	0.65	PP	CURD	0.28(0.10)	0.02(0.12)	1.12e-06	90691	0.17(0.10)	0.10(0.10)	1.18e-11	270936	0.22(0.07)	0.06(0.08)	1.1e-17	361627	0.664
7	rs6676300	1	11865243	NPPB			A/G	0.63	DBP	CURD	0.33(0.09)	-0.00(0.11)	1.7e-09	90691	0.15(0.08)	0.07(0.09)	3.55e-10	280112	0.22(0.06)	0.02(0.07)	1.29e-18	370803	0.0883
7	rs6676300	1	11865243	NPPB			A/G	0.63	SBP	CURD	0.52(0.15)	0.10(0.17)	1.48e-12	90691	0.30(0.14)	0.14(0.15)	1.29e-14	276291	0.40(0.10)	0.08(0.11)	1.82e-26	366982	0.115
8	rs72640287	1	11905735	LOC105376742	KIAA2013		T/C	0.04	DBP	CURD	-1.01(0.29)	-0.26(0.34)	1.38e-12	81012	-0.26(0.22)	-0.23(0.24)	2.63e-07	249456	-0.54(0.18)	-0.10(0.19)	4.37e-16	330468	8.69e-05
8	rs72640287	1	11905735	LOC105376742	KIAA2013		T/C	0.04	DBP	LHD	-1.12(0.25)	-0.09(0.47)	1.02e-06	41689	-0.62(0.17)	0.23(0.27)	0.000295	93760	-0.77(0.14)	0.20(0.23)	2.88e-09	135449	0.0488
8	rs72640287	1	11905735	LOC105376742	KIAA2013		T/C	0.04	SBP	CURD	-1.58(0.47)	-0.51(0.55)	1.41e-13	81012	-0.30(0.39)	-0.71(0.42)	1.91e-10	249454	-0.82(0.30)	-0.42(0.33)	5.89e-21	330466	0.000429
9	rs71647020	1	11918477	KIAA2013*	KIAA2013		A/G	0.05	SBP	CURD	-0.82(0.33)	-0.30(0.39)	5.25e-08	88081	-0.48(0.32)	-0.23(0.34)	1.78e-07	261043	-0.64(0.23)	-0.19(0.25)	1.45e-14	349124	0.183
10	rs72641011	1	11963443	PLOD1*		intron	A/G	0.04	DBP	CURD	-0.90(0.30)	-0.37(0.37)	1.62e-09	68664	-0.05(0.23)	-0.34(0.25)	7.24e-05	242105	-0.36(0.18)	-0.16(0.20)	3.63e-10	310769	5.92e-05
10	rs72641011	1	11963443	PLOD1		intron	A/G	0.04	SBP	CURD	-1.68(0.50)	-0.44(0.61)	2.63e-10	68664	-0.36(0.41)	-0.56(0.44)	8.91e-09	242103	-0.89(0.31)	-0.22(0.35)	4.9e-16	310767	0.0009
11	rs2004776	1	230712956	AGT		intron	T/C	0.24	DBP	CURD	0.20(0.10)	0.16(0.12)	1.26e-07	84958	0.25(0.09)	-0.07(0.10)	1e-06	271417	0.23(0.07)	-0.01(0.08)	8.51e-13	356375	0.0391
12	rs10926962	1	243192470	CEP170		intron	T/C	0.65	DBP	CURD	-0.44(0.10)	0.23(0.12)	2.34e-06	84958	-0.24(0.09)	0.06(0.10)	3.47e-08	251530	-0.33(0.07)	0.14(0.08)	8.51e-14	336488	0.325
13	rs7535162	1	243262387	SDCCAG8		intron	T/G	0.67	DBP	CURD	-0.34(0.09)	0.11(0.11)	2.75e-06	84958	-0.18(0.08)	-0.01(0.09)	2.69e-08	270187	-0.25(0.06)	0.05(0.07)	6.46e-14	355145	0.382
14	rs1731243	2	26707543	KCNK3*		intron	T/C	0.61	DBP	CURD	-0.21(0.09)	-0.08(0.11)	1.05e-06	90691	-0.24(0.08)	-0.04(0.09)	2.82e-17	263039	-0.23(0.06)	-0.06(0.07)	9.55e-24	353730	0.959
14	rs1731243	2	26707543	KCNK3		intron	T/C	0.61	MAP	CURD	-0.27(0.10)	-0.07(0.12)	8.13e-08	90691	-0.51(0.10)	0.21(0.11)	7.08e-23	263035	-0.40(0.07)	0.08(0.08)	7.94e-30	353726	0.207
14	rs1275923	2	26709928	KCNK3		intron	T/C	0.61	SBP	CURD	-0.44(0.15)	-0.03(0.18)	8.91e-08	90691	-0.53(0.14)	-0.03(0.15)	4.27e-27	271415	-0.49(0.10)	-0.05(0.11)	2.57e-34	362106	0.665
15	rs7599598	2	96686103	FER1L5		missense	A/G	0.57	DBP	CURD	-0.20(0.09)	-0.11(0.11)	6.61e-07	84958	-0.10(0.08)	-0.04(0.08)	5.75e-05	266540	-0.14(0.06)	-0.04(0.07)	2.57e-10	351498	0.0452
16	rs1446468	2	164106976	FIGN*			T/C	0.46	DBP	CURD	-0.34(0.09)	0.12(0.10)	4.68e-07	90691	-0.13(0.08)	-0.09(0.08)	2.69e-11	271417	-0.22(0.06)	0.00(0.06)	1.95e-17	362108	0.19
16	rs1446468	2	164106976	FIGN			T/C	0.46	SBP	CURD	-0.52(0.14)	0.11(0.17)	6.92e-08	90691	-0.31(0.13)	-0.15(0.14)	1.48e-17	271415	-0.41(0.10)	-0.03(0.11)	8.13e-25	362106	0.51
17	rs73029563	2	164151656	GRB14*			C/G	0.46	DBP	CURD	-0.36(0.09)	0.14(0.10)	1.62e-07	90691	-0.14(0.08)	-0.09(0.08)	2.14e-12	271417	-0.24(0.06)	0.01(0.06)	6.03e-19	362108	0.158
17	rs73029563	2	164151656	GRB14			C/G	0.46	SBP	CURD	-0.59(0.14)	0.17(0.17)	9.12e-09	90691	-0.29(0.13)	-0.17(0.14)	9.77e-18	271415	-0.43(0.10)	-0.02(0.11)	8.51e-26	362106	0.282
18	rs640065	3	27322446	NEK10		intron	A/T	0.27	SBP	CURD	0.54(0.15)	-0.17(0.18)	2.75e-06	90691	0.38(0.15)	-0.11(0.16)	1.51e-06	270185	0.46(0.11)	-0.16(0.12)	2.95e-12	360876	0.514
19	rs6771541	3	27485025	SLC4A7*		upstream-2KB	T/C	0.38	DBP	CURD	0.20(0.09)	0.11(0.10)	1e-07	90691	0.31(0.10)	-0.19(0.11)	6.03e-05	217883	0.24(0.07)	-0.07(0.07)	1.12e-10	308574	0.0142
19	rs6771541	3	27485025	SLC4A7		upstream-2KB	T/C	0.38	SBP	CURD	0.38(0.14)	0.08(0.17)	1e-07	90691	0.72(0.17)	-0.51(0.19)	3.39e-07	217881	0.52(0.11)	-0.22(0.12)	3.98e-13	308572	0.0238
20	rs2643826	3	27521497	LOC105377005*	SLC4A7	intron	T/C	0.45	DBP	CURD	0.25(0.09)	0.03(0.10)	2.34e-07	90691	0.06(0.08)	0.12(0.08)	8.32e-08	270187	0.15(0.06)	0.06(0.06)	5.89e-14	360878	0.0966
20	rs2643826	3	27521497	LOC105377005	SLC4A7	intron	T/C	0.45	MAP	LHD	0.33(0.08)	0.06(0.15)	3.39e-06	54785	0.19(0.07)	0.14(0.12)	4.57e-05	106028	0.25(0.05)	0.09(0.09)	1.82e-10	160813	0.38
20	rs2643826	3	27521497	LOC105377005	SLC4A7	intron	T/C	0.45	SBP	CURD	0.59(0.14)	-0.20(0.17)	2.29e-08	90691	0.45(0.13)	-0.05(0.14)	3.39e-15	270185	0.52(0.10)	-0.12(0.11)	2.69e-23	360876	0.764
21	rs73081364	3	41872124	ULK4		intron	C/G	0.15	DBP	CURD	0.08(0.12)	0.38(0.14)	1.48e-07	90691	0.47(0.11)	-0.13(0.12)	3.89e-16	263948	0.29(0.08)	0.07(0.09)	5.5e-22	354639	0.0233
21	rs79211428	3	41880318	ULK4		intron	T/C	0.14	DBP	LHD	0.37(0.11)	0.36(0.22)	8.91e-06	47970	0.35(0.09)	-0.02(0.15)	1.55e-05	94869	0.36(0.07)	0.08(0.12)	3.31e-10	142839	0.214
21	rs62258655	3	41890838	ULK4		intron	A/G	0.76	PP	CURD	0.63(0.16)	-0.23(0.19)	5.13e-07	76133	0.26(0.14)	0.30(0.15)	1.1e-26	214194	0.42(0.11)	0.10(0.12)	2.14e-32	290327	0.0802
21	rs7652369	3	41979481	ULK4	LOC100287063		T/G	0.85	PP	LHD	0.43(0.11)	0.09(0.21)	6.61e-06	46556	0.40(0.09)	-0.16(0.15)	1.23e-05	86460	0.41(0.07)	-0.09(0.12)	1.26e-10	133016	0.434
22	rs794905	3	41993238	TRAK1	LOC100287063		T/C	0.85	PP	CURD	0.31(0.13)	0.09(0.16)	7.41e-07	87919	0.39(0.13)	0.12(0.14)	3.72e-24	249160	0.35(0.09)	0.13(0.10)	2.4e-30	337079	0.529
22	rs794905	3	41993238	TRAK1	LOC100287063		T/C	0.84	PP	LHD	0.42(0.10)	0.09(0.21)	9.55e-06	46556	0.46(0.09)	-0.34(0.14)	6.46e-07	98775	0.44(0.07)	-0.22(0.12)	2.14e-11	145331	0.191
23	rs1290784	3	169379112	MECOM		intron	T/C	0.45	MAP	LHD	0.41(0.07)	-0.06(0.15)	1.78e-08	54784	0.26(0.07)	-0.03(0.11)	2.51e-05	106763	0.33(0.05)	-0.07(0.09)	5.01e-13	161547	0.282
23	rs1290784	3	169379112	MECOM		intron	T/C	0.46	SBP	CURD	0.44(0.14)	0.08(0.16)	1.74e-10	90690	0.32(0.13)	0.05(0.14)	3.39e-12	271415	0.38(0.10)	0.04(0.11)	3.39e-22	362105	0.267
23	rs1290784	3	169379112	MECOM		intron	T/C	0.45	SBP	LHD	0.54(0.10)	0.01(0.21)	1.86e-08	54784	0.38(0.10)	-0.14(0.16)	0.000126	107532	0.46(0.07)	-0.12(0.13)	4.79e-12	162316	0.179
23	rs988397	3	169381003	MECOM		intron	T/C	0.45	DBP	CURD	0.11(0.08)	0.25(0.10)	3.09e-10	90690	0.16(0.08)	0.11(0.08)	2.09e-16	271417	0.14(0.06)	0.16(0.06)	3.55e-26	362107	0.306
23	rs988397	3	169381003	MECOM		intron	T/C	0.45	DBP	LHD	0.35(0.07)	-0.09(0.14)	3.16e-07	54784	0.19(0.06)	0.05(0.10)	3.98e-05	107530	0.26(0.04)	-0.01(0.08)	2.19e-11	162314	0.249
24	rs1918973	3	169447385	LOC105374205	MECOM	upstream-2KB	A/G	0.46	DBP	LHD	0.30(0.07)	-0.04(0.14)	8.71e-06	54784	0.21(0.06)	0.01(0.10)	7.24e-05	107530	0.25(0.04)	-0.02(0.08)	5.89e-10	162314	0.573
24	rs1918973	3	169447385	LOC105374205	MECOM	upstream-2KB	A/G	0.46	MAP	CURD	0.18(0.09)	0.20(0.11)	3.39e-09	90690	0.10(0.09)	0.04(0.10)	0.000794	271413	0.13(0.06)	0.07(0.07)	1.66e-10	362103	0.00304
24	rs1918973	3	169447385	LOC105374205	MECOM	upstream-2KB	A/G	0.46	MAP	LHD	0.34(0.07)	0.01(0.15)	8.51e-07	54784	0.29(0.07)	-0.07(0.11)	1.23e-05	106763	0.31(0.05)	-0.05(0.09)	7.41e-12	161547	0.566
24	rs1918973	3	169447385	LOC105374205	MECOM	upstream-2KB	A/G	0.46	SBP	CURD	0.39(0.14)	0.07(0.16)	1.91e-08	90690	0.35(0.13)	0.03(0.14)	7.94e-13	271415	0.37(0.10)	0.03(0.11)	5.5e-21	362105	0.687
24	rs1918973	3	169447385	LOC105374205	MECOM	upstream-2KB	A/G	0.46	SBP	LHD	0.46(0.10)	0.12(0.21)	5.13e-07	54784	0.43(0.10)	-0.17(0.16)	1.1e-05	107532	0.44(0.07)	-0.08(0.13)	7.41e-12	162316	0.338
24	rs4955658	3	169453559	LOC105374205	MECOM	intron	T/G	0.47	DBP	CURD	0.07(0.08)	0.27(0.10)	2e-08	90690	0.19(0.08)	0.07(0.09)	2.88e-16	263039	0.13(0.06)	0.15(0.06)	4.17e-24	353729	0.309
25	rs871606	4	53933078	LOC105377655	RPL21P44		T/C	0.9	PP	CURD	0.86(0.16)	-0.48(0.18)	2.88e-10	90691	0.74(0.15)	-0.26(0.16)	2.04e-19	271940	0.80(0.11)	-0.35(0.12)	2.51e-29	362631	0.613
26	rs11099097	4	80246155	LOC105377304	FGF5	intron	T/C	0.28	DBP	LHD	0.31(0.08)	0.16(0.17)	6.17e-06	53260	0.36(0.07)	-0.05(0.11)	1.48e-09	107530	0.34(0.05)	0.01(0.09)	8.32e-15	160790	0.564
26	rs11099097	4	80246155	LOC105377304	FGF5	intron	T/C	0.28	MAP	LHD	0.38(0.09)	0.14(0.18)	1.18e-06	53260	0.45(0.08)	-0.13(0.12)	2.46e-10	106763	0.42(0.06)	-0.05(0.10)	2.63e-16	160023	0.46
26	rs11099097	4	80246155	LOC105377304	FGF5	intron	T/C	0.28	SBP	CURD	0.29(0.16)	0.26(0.19)	2.75e-07	89035	0.60(0.15)	0.16(0.16)	1.48e-40	271415	0.46(0.11)	0.25(0.12)	1.59e-46	360450	0.0804
26	rs11099097	4	80246155	LOC105377304	FGF5	intron	T/C	0.28	SBP	LHD	0.54(0.12)	0.11(0.26)	3.63e-06	53260	0.65(0.11)	-0.36(0.18)	2.4e-09	107532	0.60(0.08)	-0.21(0.14)	1.32e-14	160792	0.332
27	rs12509595	4	80261400	FGF5*			T/C	0.71	MAP	CURD	-0.19(0.11)	-0.18(0.13)	6.31e-07	89035	-0.26(0.10)	0.09(0.11)	1.15e-05	271413	-0.23(0.07)	0.01(0.08)	6.17e-11	360448	0.0359
27	rs16998073	4	80263187	FGF5			A/T	0.71	DBP	LHD	-0.29(0.08)	-0.19(0.16)	5.89e-06	53260	-0.30(0.07)	-0.02(0.11)	2.29e-08	113049	-0.30(0.05)	-0.07(0.09)	1.12e-13	166309	0.61
27	rs16998073	4	80263187	FGF5			A/T	0.71	MAP	LHD	-0.36(0.09)	-0.20(0.18)	1.02e-06	53260	-0.36(0.07)	0.03(0.12)	3.24e-08	112225	-0.36(0.06)	-0.03(0.10)	2.95e-14	165485	0.466
27	rs16998073	4	80263187	FGF5			A/T	0.71	SBP	CURD	-0.30(0.16)	-0.25(0.19)	2.51e-07	89035	-0.59(0.14)	-0.13(0.16)	8.91e-37	280054	-0.46(0.11)	-0.22(0.12)	4.17e-43	369089	0.141
27	rs16998073	4	80263187	FGF5			A/T	0.71	SBP	LHD	-0.50(0.12)	-0.19(0.26)	3.47e-06	53260	-0.52(0.11)	0.21(0.17)	5.62e-07	112996	-0.51(0.08)	0.10(0.14)	2.95e-12	166256	0.324
28	rs13107325	4	102267552	SLC39A8		missense	T/C	0.07	DBP	CURD	-0.36(0.16)	-0.20(0.20)	1.45e-06	83296	-0.60(0.15)	0.10(0.17)	4.47e-16	271325	-0.48(0.11)	-0.03(0.13)	4.17e-22	354621	0.514
28	rs13107325	4	102267552	SLC39A8		missense	T/C	0.07	MAP	CURD	-0.34(0.18)	-0.24(0.22)	7.24e-06	83296	-0.55(0.18)	0.23(0.20)	2.09e-06	271261	-0.45(0.13)	0.06(0.14)	3.8e-11	354557	0.136
29	rs13139571	4	155724361	GUCY1A3		intron	A/C	0.24	DBP	LHD	-0.25(0.08)	-0.34(0.16)	2.4e-06	54785	-0.19(0.07)	-0.07(0.12)	0.000389	106795	-0.22(0.05)	-0.14(0.09)	3.31e-09	161580	0.137
29	rs13139571	4	155724361	GUCY1A3		intron	A/C	0.24	MAP	LHD	-0.29(0.09)	-0.31(0.18)	2.63e-06	54785	-0.21(0.08)	-0.11(0.13)	0.000417	106028	-0.25(0.06)	-0.16(0.10)	2.14e-09	160813	0.218
29	rs13139571	4	155724361	GUCY1A3		intron	A/C	0.23	SBP	CURD	-0.20(0.16)	-0.28(0.19)	7.94e-06	90691	-0.19(0.15)	-0.20(0.17)	2.04e-09	270185	-0.19(0.11)	-0.22(0.12)	8.51e-15	360876	0.731
30	rs11731886	4	155738667	LOC105377506	GUCY1A3	intron	A/C	0.76	DBP	CURD	0.13(0.10)	0.18(0.12)	6.31e-06	90691	0.14(0.09)	0.15(0.10)	6.92e-13	270187	0.13(0.07)	0.16(0.08)	1.82e-18	360878	0.9
31	rs3762988	5	32709547	NPR3*		intron	T/C	0.39	SBP	CURD	0.00(0.15)	-0.57(0.17)	1.32e-08	87919	-0.25(0.14)	-0.27(0.15)	1.82e-21	271676	-0.13(0.10)	-0.40(0.11)	1.51e-29	359595	0.415
31	rs3762988	5	32709547	NPR3		intron	T/C	0.39	SBP	LHD	-0.67(0.11)	0.46(0.23)	9.55e-09	53371	-0.41(0.10)	0.15(0.17)	3.8e-05	108051	-0.53(0.07)	0.29(0.13)	5.89e-13	161422	0.217
31	rs3792765	5	32713730	NPR3		intron	A/G	0.61	DBP	LHD	0.38(0.07)	-0.45(0.15)	1.07e-06	53371	0.20(0.06)	-0.03(0.10)	0.00049	107530	0.28(0.05)	-0.18(0.08)	4.9e-09	160901	0.0506
31	rs7733331	5	32828740	NPR3			T/C	0.4	PP	CURD	-0.22(0.10)	-0.10(0.11)	1e-07	90691	-0.15(0.09)	-0.13(0.10)	1.86e-14	266005	-0.19(0.07)	-0.10(0.07)	1.1e-21	356696	0.735
32	rs4475251	5	115039988	TRIM36			T/G	0.44	DBP	CURD	-0.37(0.09)	0.20(0.10)	2.24e-06	90691	-0.15(0.08)	0.02(0.09)	9.55e-05	250362	-0.25(0.06)	0.11(0.06)	4.9e-10	341053	0.148
33	rs12716337	5	158387220	LOC101927697	EBF1	intron	T/C	0.62	DBP	CURD	0.44(0.09)	-0.31(0.10)	3.8e-07	90691	0.16(0.08)	0.08(0.09)	3.31e-12	271417	0.29(0.06)	-0.08(0.06)	2.46e-17	362108	0.0155
33	rs71585962	5	158417097	LOC101927697	EBF1		A/G	0.37	SBP	CURD	-0.49(0.14)	0.14(0.17)	2e-06	90691	-0.47(0.14)	0.04(0.15)	7.24e-17	271415	-0.48(0.10)	0.08(0.11)	6.76e-23	362106	0.755
34	rs7446877	5	158441123	LOC105377681	EBF1		T/C	0.37	DBP	CURD	-0.39(0.09)	0.22(0.10)	1.41e-06	90691	-0.17(0.08)	-0.07(0.09)	2.75e-14	271417	-0.27(0.06)	0.05(0.07)	1.18e-19	362108	0.101
34	rs7446877	5	158441123	LOC105377681	EBF1		T/C	0.37	SBP	CURD	-0.47(0.14)	0.11(0.17)	2.46e-06	90691	-0.47(0.14)	0.05(0.15)	1.86e-16	271415	-0.47(0.10)	0.07(0.11)	1.91e-22	362106	0.824
35	rs1799945	6	26090951	HFE		intron	C/G	0.85	MAP	LHD	-0.51(0.11)	0.14(0.21)	2.82e-06	46629	-0.47(0.10)	0.13(0.16)	2.69e-07	107237	-0.49(0.07)	0.14(0.13)	3.47e-13	153866	0.964
35	rs2032451	6	26091942	HFE		intron	T/G	0.15	DBP	CURD	0.35(0.12)	0.03(0.14)	9.77e-08	90688	0.40(0.11)	0.05(0.12)	3.09e-25	266282	0.38(0.08)	0.05(0.09)	1.59e-32	356970	0.657
35	rs2032451	6	26091942	HFE		intron	T/G	0.15	DBP	LHD	0.44(0.10)	0.02(0.19)	1.23e-06	48242	0.52(0.09)	-0.17(0.14)	1.95e-10	102542	0.48(0.07)	-0.10(0.11)	1.55e-16	150784	0.713
35	rs2032451	6	26091942	HFE		intron	T/G	0.15	MAP	CURD	0.39(0.13)	0.00(0.15)	3.02e-07	90688	0.34(0.13)	-0.09(0.14)	5.62e-07	266278	0.36(0.09)	-0.07(0.10)	1.7e-13	356966	0.293
36	rs198851	6	26104404	HIST1H4C		downstream-500B	T/G	0.15	DBP	CURD	0.36(0.12)	0.03(0.14)	7.41e-08	90688	0.41(0.11)	0.05(0.12)	8.51e-26	266282	0.39(0.08)	0.05(0.09)	2.82e-33	356970	0.648
36	rs198851	6	26104404	HIST1H4C		downstream-500B	T/G	0.15	DBP	LHD	0.45(0.10)	-0.02(0.19)	1.05e-06	48242	0.52(0.09)	-0.16(0.14)	1.78e-10	102542	0.49(0.07)	-0.10(0.11)	1.05e-16	150784	0.825
36	rs198851	6	26104404	HIST1H4C		downstream-500B	T/G	0.15	MAP	CURD	0.40(0.13)	0.01(0.16)	1.78e-07	90688	0.33(0.13)	-0.07(0.14)	5.25e-07	266278	0.36(0.09)	-0.06(0.10)	8.32e-14	356966	0.267
36	rs198851	6	26104404	HIST1H4C		downstream-500B	T/G	0.15	MAP	LHD	0.50(0.10)	-0.12(0.21)	2.24e-06	48242	0.57(0.10)	-0.24(0.16)	6.46e-09	101775	0.54(0.07)	-0.19(0.13)	7.24e-15	150017	0.881
37	rs129128	6	26125114	HIST1H2AC		downstream-500B	T/C	0.86	DBP	CURD	-0.39(0.13)	0.06(0.15)	3.72e-06	84955	-0.35(0.11)	-0.09(0.12)	2.4e-22	274977	-0.37(0.08)	-0.05(0.09)	6.61e-28	359932	0.439
38	rs198812	6	26128182	HIST1H2BC			C/G	0.86	DBP	CURD	-0.37(0.12)	0.00(0.15)	4.9e-07	90688	-0.36(0.11)	-0.09(0.12)	2.75e-23	266282	-0.37(0.08)	-0.06(0.09)	6.46e-30	356970	0.645
38	rs198812	6	26128182	HIST1H2BC			C/G	0.86	DBP	LHD	-0.44(0.10)	-0.01(0.20)	3.72e-06	48242	-0.51(0.09)	0.10(0.15)	5.25e-10	102542	-0.48(0.07)	0.05(0.12)	1.1e-15	150784	0.874
38	rs198812	6	26128182	HIST1H2BC			C/G	0.86	MAP	CURD	-0.41(0.14)	0.04(0.16)	2e-06	90688	-0.27(0.13)	-0.04(0.14)	1.12e-08	266278	-0.34(0.10)	0.01(0.11)	1.26e-14	356966	0.6
39	rs16896398	6	43294966	SLC22A7	TTBK1	upstream-2KB	A/T	0.7	PP	CURD	-0.23(0.11)	-0.09(0.12)	8.71e-07	90691	-0.12(0.10)	-0.03(0.11)	0.000646	266005	-0.17(0.07)	-0.03(0.08)	5.25e-09	356696	0.0505
40	rs1563788	6	43340625	ZNF318		intron	T/C	0.29	PP	CURD	0.20(0.11)	0.14(0.12)	5.01e-07	90691	0.13(0.10)	0.02(0.11)	0.000525	257627	0.16(0.07)	0.04(0.08)	2.57e-09	348318	0.0474
40	rs1563788	6	43340625	ZNF318		intron	T/C	0.29	SBP	CURD	0.25(0.15)	0.19(0.18)	5.62e-06	90691	0.18(0.15)	0.09(0.16)	2.57e-05	263037	0.22(0.11)	0.10(0.12)	2.04e-10	353728	0.255
41	rs7763558	6	43381477	LOC105375065	ZNF318		A/G	0.33	PP	CURD	0.21(0.10)	0.11(0.12)	9.33e-07	90691	0.13(0.10)	0.03(0.10)	0.000107	266005	0.16(0.07)	0.04(0.08)	5.01e-10	356696	0.0904
41	rs1214759	6	43385242	LOC105375065	ZNF318		A/G	0.33	SBP	CURD	0.32(0.15)	0.11(0.17)	2.69e-06	90691	0.23(0.14)	0.03(0.15)	7.76e-06	280054	0.27(0.10)	0.04(0.11)	2.82e-11	370745	0.256
42	rs9375463	6	126845743	LOC105377991	RSPO3		A/C	0.57	DBP	CURD	-0.33(0.09)	0.11(0.10)	7.76e-07	90691	-0.26(0.08)	-0.06(0.09)	2.82e-22	258341	-0.29(0.06)	0.00(0.07)	2.46e-28	349032	0.296
42	rs9375463	6	126845743	LOC105377991	RSPO3		A/C	0.57	MAP	CURD	-0.32(0.10)	0.07(0.11)	3.39e-06	90691	-0.28(0.09)	0.06(0.10)	8.91e-10	258337	-0.30(0.07)	0.07(0.08)	1.18e-15	349028	0.869
43	rs11154376	6	126879498	LOC105377990	RSPO3	intron	A/G	0.56	DBP	CURD	-0.30(0.09)	0.09(0.10)	5.37e-06	90691	-0.23(0.08)	-0.08(0.09)	1.15e-21	271417	-0.26(0.06)	-0.02(0.06)	9.33e-27	362108	0.242
44	rs7808452	7	27281931	EVX1-AS	EVX1		A/T	0.1	DBP	CURD	0.22(0.14)	0.26(0.17)	8.32e-07	90691	0.36(0.12)	-0.15(0.13)	5.5e-06	269066	0.30(0.09)	-0.01(0.10)	4.68e-11	359757	0.0318
44	rs6961048	7	27288568	EVX1-AS	EVX1		C/G	0.9	MAP	CURD	-0.19(0.16)	-0.30(0.18)	8.91e-06	90691	-0.55(0.14)	0.36(0.16)	4.27e-06	269062	-0.38(0.11)	0.11(0.12)	1.38e-09	359753	0.0101
45	rs62481856	7	106771636	PIK3CG	CCDC71L		A/G	0.2	PP	LHD	0.40(0.09)	0.04(0.18)	2.04e-06	54785	0.65(0.08)	-0.21(0.11)	3.98e-27	106795	0.54(0.06)	-0.09(0.09)	4.9e-32	161580	0.102
45	rs2392929	7	106773623	PIK3CG	CCDC71L		T/G	0.8	PP	CURD	-0.39(0.12)	-0.06(0.15)	5.75e-10	90691	-0.50(0.11)	-0.19(0.13)	3.16e-88	264775	-0.46(0.08)	-0.18(0.09)	2e-97	355466	0.0115
45	rs13225723	7	106776021	PIK3CG	CCDC71L		A/G	0.21	SBP	CURD	0.35(0.18)	0.20(0.21)	1.82e-06	89036	0.51(0.19)	0.21(0.21)	1.1e-18	249027	0.43(0.13)	0.24(0.15)	1.45e-24	338063	0.409
46	rs3918226	7	150993088	NOS3*		intron	T/C	0.08	DBP	CURD	0.89(0.19)	-0.16(0.23)	1.95e-11	76872	0.56(0.16)	-0.01(0.17)	2.69e-20	257877	0.69(0.12)	-0.11(0.13)	4.17e-31	334749	0.194
46	rs3918226	7	150993088	NOS3		intron	T/C	0.08	SBP	CURD	1.23(0.30)	-0.35(0.37)	1.86e-07	76872	0.23(0.27)	0.42(0.29)	1.02e-08	254781	0.67(0.20)	0.02(0.23)	1.7e-14	331653	0.0313
47	rs1461695	8	119432061	NOV			A/G	0.26	PP	LHD	0.37(0.08)	-0.07(0.17)	6.03e-06	54785	0.34(0.07)	0.06(0.12)	2.95e-10	106795	0.36(0.05)	0.02(0.09)	1.45e-15	161580	0.817
47	rs6983393	8	119434109	NOV			A/T	0.26	PP	CURD	0.22(0.11)	0.16(0.13)	3.55e-08	90691	0.43(0.11)	0.05(0.12)	2.24e-32	260269	0.33(0.08)	0.12(0.08)	1.02e-39	350960	0.181
48	rs67744136	10	18416407	CACNB2*		intron	T/C	0.65	DBP	CURD	0.28(0.09)	0.14(0.10)	1.15e-13	90691	0.21(0.08)	0.02(0.09)	2.29e-12	270187	0.24(0.06)	0.04(0.07)	1.2e-24	360878	0.0191
48	rs1813353	10	18418519	CACNB2		intron	T/C	0.65	SBP	CURD	0.48(0.14)	0.10(0.17)	1.38e-11	90691	0.59(0.14)	-0.11(0.15)	8.32e-21	271415	0.54(0.10)	-0.02(0.11)	3.31e-32	362106	0.569
48	rs17613287	10	18430748	CACNB2		intron	A/T	0.66	MAP	CURD	0.32(0.10)	0.16(0.12)	3.31e-14	90691	0.26(0.09)	-0.14(0.10)	0.000316	270183	0.28(0.07)	-0.06(0.08)	9.33e-14	360874	8.02e-06
48	rs17613287	10	18430748	CACNB2		intron	A/T	0.66	SBP	LHD	0.56(0.11)	0.18(0.22)	2.46e-09	54785	0.29(0.11)	0.09(0.17)	0.000525	106797	0.42(0.08)	0.07(0.13)	7.08e-12	161582	0.0578
49	rs2505084	10	30046591	KIAA1462		intron	A/G	0.48	PP	CURD	0.56(0.10)	-0.37(0.12)	2.57e-09	90691	0.45(0.09)	-0.36(0.10)	6.61e-07	274699	0.50(0.07)	-0.38(0.07)	2.19e-15	365390	0.279
50	rs72831345	10	61758990	C10orf107*		intron	A/G	0.14	DBP	CURD	-0.44(0.12)	0.01(0.14)	2.82e-09	90691	-0.59(0.11)	0.15(0.12)	1.07e-25	271159	-0.52(0.08)	0.09(0.09)	8.91e-35	361850	0.651
50	rs72831345	10	61758990	C10orf107		intron	A/G	0.14	MAP	CURD	-0.54(0.14)	0.08(0.16)	1.62e-09	90691	-0.53(0.13)	0.32(0.14)	1.29e-07	271155	-0.53(0.09)	0.26(0.10)	9.55e-16	361846	0.0411
50	rs72831345	10	61758990	C10orf107		intron	A/G	0.14	SBP	CURD	-0.75(0.20)	0.17(0.24)	3.8e-08	90691	-0.75(0.19)	0.19(0.21)	7.76e-16	271157	-0.75(0.14)	0.19(0.15)	8.71e-24	361848	0.988
51	rs7909591	10	102899261	AS3MT		intron	T/G	0.29	PP	CURD	0.10(0.11)	-0.42(0.13)	8.71e-06	90691	-0.50(0.10)	0.20(0.11)	1.82e-21	266005	-0.23(0.07)	-0.08(0.08)	3.72e-23	356696	0.000286
51	rs7909591	10	102899261	AS3MT		intron	T/G	0.28	PP	LHD	-0.29(0.08)	-0.23(0.16)	4.47e-06	54785	-0.26(0.07)	0.06(0.11)	4.37e-05	107530	-0.27(0.05)	-0.01(0.09)	7.08e-10	162315	0.179
52	rs2484294	10	114032303	LOC105378493	ADRB1		A/G	0.72	MAP	LHD	0.45(0.08)	-0.25(0.18)	6.31e-07	54784	0.24(0.08)	0.09(0.13)	6.92e-05	106763	0.34(0.06)	-0.05(0.10)	1.23e-10	161547	0.14
52	rs2484294	10	114032303	LOC105378493	ADRB1		A/G	0.73	SBP	CURD	0.43(0.16)	0.16(0.19)	1.62e-09	90285	0.59(0.15)	-0.23(0.16)	5.25e-12	271415	0.52(0.11)	-0.09(0.12)	1.55e-20	361700	0.112
52	rs2484294	10	114032303	LOC105378493	ADRB1		A/G	0.72	SBP	LHD	0.62(0.12)	-0.36(0.25)	1.18e-06	54784	0.33(0.11)	0.02(0.18)	0.000776	107532	0.47(0.08)	-0.14(0.15)	2.19e-09	162316	0.19
52	rs740746	10	114033028	LOC105378493	ADRB1		A/G	0.73	DBP	CURD	0.14(0.10)	0.21(0.11)	2.82e-07	90285	0.37(0.09)	-0.10(0.09)	1e-16	280112	0.27(0.06)	0.02(0.07)	7.59e-23	370397	0.105
52	rs740746	10	114033028	LOC105378493	ADRB1		A/G	0.72	DBP	LHD	0.37(0.08)	-0.20(0.16)	9.12e-06	54784	0.17(0.07)	0.13(0.11)	0.000224	113049	0.25(0.05)	0.00(0.09)	1.05e-08	167833	0.103
52	rs740746	10	114033028	LOC105378493	ADRB1		A/G	0.73	MAP	CURD	0.22(0.11)	0.20(0.13)	5.5e-09	90285	0.39(0.10)	-0.29(0.11)	2.69e-05	280047	0.31(0.07)	-0.13(0.08)	1.66e-10	370332	0.00018
53	rs2773469	10	114039136	ADRB1*			A/G	0.27	SBP	CURD	-0.43(0.16)	-0.15(0.19)	2e-09	90285	-0.61(0.15)	0.25(0.16)	6.03e-12	271415	-0.53(0.11)	0.10(0.12)	2.34e-20	361700	0.105
53	rs1801253	10	114045297	ADRB1		missense	C/G	0.73	DBP	CURD	0.14(0.10)	0.22(0.12)	2.09e-07	90285	0.39(0.09)	-0.12(0.09)	1.23e-16	277437	0.28(0.06)	0.01(0.07)	9.12e-23	367722	0.076
53	rs1801253	10	114045297	ADRB1		missense	C/G	0.73	DBP	LHD	0.38(0.08)	-0.22(0.16)	4.47e-06	54784	0.17(0.07)	0.12(0.11)	0.000324	113049	0.26(0.05)	-0.01(0.09)	8.51e-09	167833	0.0859
53	rs1801253	10	114045297	ADRB1		missense	C/G	0.73	MAP	CURD	0.22(0.11)	0.21(0.13)	6.17e-09	90285	0.41(0.10)	-0.31(0.11)	1.7e-05	277373	0.32(0.07)	-0.14(0.08)	1.78e-10	367658	0.000118
53	rs1801253	10	114045297	ADRB1		missense	C/G	0.73	MAP	LHD	0.46(0.08)	-0.28(0.18)	3.98e-07	54784	0.21(0.08)	0.11(0.13)	0.00024	112225	0.32(0.06)	-0.04(0.10)	5.89e-10	167009	0.063
53	rs1801253	10	114045297	ADRB1		missense	C/G	0.73	SBP	LHD	0.62(0.12)	-0.39(0.25)	1.32e-06	54784	0.32(0.11)	0.04(0.18)	0.000617	112996	0.46(0.08)	-0.14(0.15)	2.29e-09	167780	0.162
54	rs612652	11	1865986	LSP1*		intron	T/C	0.41	DBP	CURD	-0.43(0.10)	0.16(0.12)	1.26e-07	79644	-0.16(0.09)	-0.10(0.09)	1.86e-13	254869	-0.28(0.07)	0.02(0.07)	4.9e-20	334513	0.132
54	rs4980389	11	1871355	LSP1		intron	A/G	0.41	MAP	CURD	0.56(0.12)	-0.13(0.14)	7.41e-11	79644	0.08(0.10)	0.16(0.11)	2e-08	251102	0.28(0.08)	-0.00(0.09)	2.09e-16	330746	0.000881
54	rs4980389	11	1871355	LSP1		intron	A/G	0.41	PP	CURD	0.47(0.12)	-0.13(0.14)	1.7e-07	79644	0.38(0.10)	-0.03(0.11)	4.17e-21	251102	0.41(0.08)	-0.07(0.09)	3.98e-28	330746	0.853
54	rs4980389	11	1871355	LSP1		intron	A/G	0.41	SBP	CURD	0.88(0.17)	-0.22(0.21)	2.75e-12	79644	0.51(0.15)	0.12(0.16)	3.24e-28	251104	0.67(0.11)	-0.03(0.13)	6.76e-40	330748	0.268
54	rs588321	11	1875727	LSP1		intron	C/G	0.4	SBP	LHD	0.61(0.15)	0.39(0.33)	1.78e-06	46754	0.52(0.11)	0.19(0.18)	5.75e-11	102318	0.55(0.09)	0.22(0.16)	8.13e-17	149072	0.584
55	rs7483477	11	1899025	LINC01150*	LSP1	intron	T/G	0.75	MAP	CURD	-0.44(0.14)	0.02(0.17)	7.94e-07	76872	-0.02(0.11)	-0.19(0.12)	1.62e-05	262953	-0.18(0.09)	-0.07(0.10)	5.01e-10	339825	0.00773
55	rs7483477	11	1899025	LINC01150	LSP1	intron	T/G	0.75	SBP	CURD	-0.67(0.20)	-0.01(0.24)	7.94e-08	76872	-0.37(0.16)	-0.09(0.18)	2.63e-12	262955	-0.48(0.13)	-0.01(0.14)	2.88e-19	339827	0.18
56	rs3781956	11	1924654	TNNT3*		intron	A/G	0.37	MAP	CURD	0.44(0.12)	-0.13(0.14)	1.29e-06	79644	0.00(0.10)	0.24(0.10)	9.55e-09	260420	0.18(0.07)	0.08(0.08)	3.39e-13	340064	0.0109
56	rs3781956	11	1924654	TNNT3		intron	A/G	0.37	SBP	CURD	0.66(0.17)	-0.18(0.21)	3.02e-07	79644	0.35(0.14)	0.26(0.15)	2.04e-25	260422	0.48(0.11)	0.11(0.12)	6.76e-32	340066	0.236
57	rs217719	11	1973993	MRPL23	MRPL23-AS1	intron	A/G	0.23	MAP	CURD	0.37(0.12)	-0.05(0.14)	5.75e-06	89036	0.11(0.11)	0.09(0.12)	2.95e-05	270183	0.23(0.08)	0.01(0.09)	4.57e-10	359219	0.129
58	rs12575654	11	1989738	LINC01219*	MRPL23-AS1	upstream-2KB	A/G	0.26	MAP	CURD	0.45(0.12)	-0.15(0.14)	1.12e-06	89036	0.08(0.10)	0.09(0.11)	0.00038	270183	0.24(0.08)	-0.04(0.09)	5.5e-09	359219	0.0237
58	rs12575654	11	1989738	LINC01219	MRPL23-AS1	upstream-2KB	A/G	0.26	SBP	CURD	0.58(0.17)	-0.11(0.20)	9.12e-07	89036	0.37(0.16)	0.05(0.17)	1.18e-11	270185	0.47(0.12)	-0.03(0.13)	6.17e-18	359221	0.603
59	rs12799126	11	16286917	SOX6		intron	T/G	0.2	DBP	CURD	0.46(0.10)	-0.24(0.12)	6.61e-07	90691	0.25(0.09)	0.04(0.10)	3.72e-13	271159	0.35(0.07)	-0.08(0.08)	3.55e-19	361850	0.212
59	rs893311	11	16296972	SOX6		intron	T/G	0.2	MAP	CURD	0.50(0.12)	-0.24(0.14)	6.92e-07	90691	0.19(0.11)	0.01(0.12)	2.29e-05	271155	0.33(0.08)	-0.12(0.09)	3.8e-11	361846	0.12
59	rs11023906	11	16302860	SOX6		intron	A/G	0.2	SBP	CURD	0.65(0.17)	-0.29(0.20)	4.07e-06	90691	0.45(0.16)	0.08(0.17)	1.12e-17	271157	0.55(0.12)	-0.06(0.13)	6.61e-23	361848	0.26
60	rs448671	11	16878556	PLEKHA7		intron	T/G	0.73	SBP	CURD	-0.52(0.16)	0.10(0.18)	8.32e-07	90691	-0.16(0.15)	-0.22(0.16)	4.17e-10	263037	-0.34(0.11)	-0.06(0.12)	5.5e-16	353728	0.227
61	rs664382	11	17184972	PIK3C2A		intron	A/T	0.68	SBP	CURD	-0.57(0.15)	0.28(0.17)	9.55e-06	90691	-0.02(0.14)	-0.24(0.15)	6.46e-05	267652	-0.28(0.10)	0.01(0.11)	1.1e-08	358343	0.0247
62	rs199518026	11	17346470	LOC105376575	NCR3LG1	intron	D/I	0.66	SBP	CURD	-0.72(0.16)	0.39(0.18)	2.29e-07	89036	-0.17(0.19)	-0.17(0.21)	4.47e-07	194417	-0.51(0.12)	0.17(0.13)	3.39e-13	283453	0.0851
63	rs12146443	11	17362951	NCR3LG1*		intron	T/C	0.39	SBP	CURD	0.59(0.14)	-0.25(0.17)	5.25e-07	90691	0.27(0.13)	0.03(0.15)	1.55e-08	271415	0.42(0.10)	-0.11(0.11)	1e-14	362106	0.265
64	rs10734252	11	17383292	KCNJ11*		intron	A/G	0.62	SBP	CURD	-0.59(0.14)	0.26(0.17)	4.57e-07	90691	-0.27(0.13)	-0.03(0.15)	9.33e-09	271415	-0.42(0.10)	0.11(0.11)	4.9e-15	362106	0.266
65	rs2306363	11	65638129	SIPA1	PCNXL3	upstream-2KB	T/G	0.2	SBP	CURD	-0.60(0.17)	0.19(0.21)	5.37e-06	90689	-0.60(0.17)	0.20(0.18)	1.95e-11	269927	-0.60(0.12)	0.20(0.13)	3.72e-17	360616	0.994
66	rs10750766	11	65706327	KAT5			A/C	0.71	DBP	CURD	0.29(0.09)	-0.04(0.11)	8.32e-06	90689	0.11(0.09)	0.05(0.10)	6.31e-05	241133	0.19(0.06)	-0.01(0.07)	1.02e-09	331822	0.2
66	rs10750766	11	65706327	KAT5			A/C	0.71	SBP	CURD	0.54(0.15)	-0.16(0.18)	1.15e-06	90689	0.28(0.15)	-0.00(0.17)	1.48e-05	241131	0.41(0.11)	-0.10(0.12)	1.91e-11	331820	0.302
67	rs670401	11	100701679	ARHGAP42		intron	A/G	0.29	SBP	CURD	-0.65(0.15)	0.37(0.18)	4.68e-06	90691	-0.51(0.14)	-0.07(0.16)	5.89e-24	270185	-0.57(0.10)	0.08(0.12)	4.37e-28	360876	0.0187
67	rs633185	11	100722807	ARHGAP42		intron	C/G	0.71	MAP	LHD	0.33(0.08)	0.08(0.17)	7.94e-06	54785	0.33(0.08)	-0.01(0.12)	4.68e-07	106763	0.33(0.06)	0.02(0.10)	2e-12	161548	0.864
67	rs604723	11	100739815	ARHGAP42		intron	T/C	0.28	DBP	CURD	-0.27(0.09)	-0.01(0.11)	1.59e-06	90691	-0.30(0.08)	-0.03(0.09)	4.68e-22	280112	-0.29(0.06)	-0.03(0.07)	3.24e-28	370803	0.71
67	rs604723	11	100739815	ARHGAP42		intron	T/C	0.28	DBP	LHD	-0.31(0.08)	-0.11(0.15)	2.04e-06	54785	-0.25(0.07)	0.02(0.11)	1.66e-05	113049	-0.28(0.05)	-0.01(0.09)	4.07e-11	167834	0.397
67	rs604723	11	100739815	ARHGAP42		intron	T/C	0.28	MAP	CURD	-0.38(0.11)	0.09(0.13)	5.37e-07	90691	-0.24(0.10)	0.10(0.11)	0.000166	280047	-0.30(0.07)	0.12(0.08)	2.63e-10	370738	0.0962
68	rs4936098	11	130410772	ADAMTS8		intron	A/G	0.36	PP	CURD	0.45(0.10)	-0.28(0.12)	3.89e-06	90691	0.48(0.10)	0.04(0.10)	6.76e-47	274699	0.46(0.07)	-0.04(0.08)	6.76e-48	365390	1.06e-05
69	rs12829468	12	20043911	LOC100506393		intron	A/C	0.28	DBP	CURD	-0.35(0.10)	0.09(0.11)	6.46e-07	90691	-0.25(0.09)	-0.06(0.10)	1.91e-18	261809	-0.30(0.07)	-0.01(0.07)	6.92e-25	352500	0.569
69	rs10743353	12	20047028	LOC100506393		intron	T/C	0.71	DBP	LHD	0.38(0.07)	-0.40(0.16)	6.31e-06	54785	0.23(0.07)	0.09(0.11)	7.24e-06	106795	0.30(0.05)	-0.08(0.09)	5.62e-10	161580	0.0415
70	rs4759320	12	54039227	HOXC4*		intron	C/G	0.35	DBP	CURD	-0.34(0.10)	0.11(0.11)	3.89e-06	90691	-0.23(0.08)	0.07(0.09)	1.74e-06	271417	-0.28(0.06)	0.10(0.07)	6.17e-12	362108	0.383
70	rs4759320	12	54039227	HOXC4		intron	C/G	0.35	SBP	CURD	-0.63(0.15)	0.27(0.18)	5.5e-07	90691	-0.37(0.15)	0.03(0.16)	2.82e-09	271415	-0.49(0.11)	0.15(0.12)	1.1e-15	362106	0.455
71	rs145485557	12	89445110	LOC105369889	POC1B	intron	T/C	0.06	DBP	CURD	-1.21(0.23)	0.61(0.27)	1.59e-09	84447	-0.44(0.19)	0.07(0.20)	7.08e-08	258640	-0.75(0.15)	0.33(0.16)	1.32e-15	343087	0.0149
71	rs145485557	12	89445110	LOC105369889	POC1B	intron	T/C	0.06	MAP	CURD	-1.40(0.26)	0.70(0.31)	4.37e-10	84447	-0.62(0.22)	0.34(0.23)	3.8e-05	258636	-0.94(0.17)	0.57(0.18)	4.37e-13	343083	0.00578
71	rs145485557	12	89445110	LOC105369889	POC1B	intron	T/C	0.06	SBP	CURD	-1.76(0.38)	0.80(0.45)	2.09e-08	84447	-0.71(0.32)	0.00(0.35)	2.4e-09	258638	-1.15(0.25)	0.39(0.27)	2.19e-16	343085	0.0684
72	rs75615848	12	89481583	POC1B*		intron	A/G	0.06	DBP	CURD	-1.00(0.26)	0.41(0.30)	1e-06	83202	-0.29(0.20)	-0.09(0.21)	7.41e-07	257661	-0.56(0.16)	0.14(0.17)	5.37e-12	340863	0.0433
72	rs75615848	12	89481583	POC1B		intron	A/G	0.06	MAP	CURD	-1.14(0.29)	0.43(0.33)	2.51e-07	83202	-0.53(0.23)	0.27(0.24)	0.000562	257657	-0.77(0.18)	0.41(0.19)	2.34e-09	340859	0.0162
72	rs75615848	12	89481583	POC1B		intron	A/G	0.06	SBP	CURD	-1.41(0.42)	0.36(0.48)	1.18e-06	83202	-0.37(0.34)	-0.33(0.37)	5.25e-08	257659	-0.79(0.26)	0.01(0.29)	2.82e-13	340861	0.0731
73	rs7302816	12	89556543	LOC102724782	POC1B	intron	A/C	0.8	PP	LHD	0.45(0.09)	0.06(0.18)	5.62e-08	54785	0.29(0.08)	-0.08(0.13)	0.000251	107046	0.36(0.06)	-0.06(0.11)	6.31e-11	161831	0.125
73	rs1689040	12	89584456	LOC102724782	ATP2B1	intron	T/C	0.4	DBP	LHD	-0.38(0.07)	-0.14(0.14)	7.76e-11	54785	-0.35(0.06)	0.02(0.10)	4.79e-11	107530	-0.36(0.05)	-0.02(0.08)	2.51e-21	162315	0.407
73	rs1689040	12	89584456	LOC102724782	ATP2B1	intron	T/C	0.4	MAP	LHD	-0.48(0.07)	-0.10(0.15)	1.55e-13	54785	-0.41(0.07)	0.04(0.12)	1.07e-11	106763	-0.45(0.05)	0.00(0.09)	7.76e-25	161548	0.316
73	rs1689040	12	89584456	LOC102724782	ATP2B1	intron	T/C	0.4	SBP	LHD	-0.68(0.10)	-0.06(0.21)	5.13e-13	54785	-0.55(0.10)	0.05(0.16)	2e-10	107532	-0.61(0.07)	0.03(0.13)	5.5e-23	162317	0.369
74	rs1401982	12	89595822	ATP2B1*		intron	A/G	0.6	DBP	LHD	0.37(0.07)	0.15(0.14)	7.76e-11	54785	0.32(0.06)	-0.01(0.10)	2.29e-10	113049	0.34(0.04)	0.03(0.08)	1.48e-20	167834	0.327
74	rs2681485	12	89631845	ATP2B1		intron	A/G	0.6	MAP	LHD	0.49(0.07)	0.10(0.15)	1.2e-13	54785	0.41(0.07)	-0.04(0.12)	5.89e-12	106763	0.45(0.05)	-0.01(0.09)	3.09e-25	161548	0.331
74	rs2681485	12	89631845	ATP2B1		intron	A/G	0.6	SBP	LHD	0.68(0.10)	0.09(0.21)	3.39e-13	54785	0.56(0.10)	-0.05(0.16)	1.07e-10	107532	0.62(0.07)	-0.03(0.13)	2.09e-23	162317	0.359
74	rs11105352	12	89632685	ATP2B1		intron	A/G	0.16	DBP	CURD	-0.61(0.11)	0.15(0.13)	1.23e-14	90691	-0.36(0.11)	-0.04(0.11)	3.63e-21	271159	-0.48(0.08)	0.06(0.09)	1.78e-35	361850	0.219
74	rs11105352	12	89632685	ATP2B1		intron	A/G	0.16	MAP	CURD	-0.74(0.13)	0.15(0.15)	3.39e-18	90691	-0.48(0.12)	0.26(0.13)	2.88e-08	271155	-0.61(0.09)	0.28(0.10)	1.51e-23	361846	0.000216
74	rs11105352	12	89632685	ATP2B1		intron	A/G	0.16	PP	CURD	-0.36(0.13)	-0.10(0.15)	2.57e-09	90691	-0.45(0.13)	0.02(0.14)	2.4e-19	261984	-0.40(0.09)	-0.03(0.10)	2.46e-28	352675	0.827
74	rs11431123	12	89652741	ATP2B1		intron	D/I	0.83	SBP	CURD	1.00(0.19)	-0.13(0.22)	6.31e-18	88632	0.64(0.27)	0.14(0.28)	2.4e-20	183933	0.88(0.15)	-0.07(0.17)	2.14e-38	272565	0.434
74	rs12230074	12	89697090	ATP2B1		intron	A/G	0.83	SBP	CURD	0.93(0.18)	-0.10(0.21)	9.333e-17	90691	1.19(0.18)	0.01(0.20)	4.571e-154	262779	1.09(0.13)	0.05(0.14)	3.388e-170	353470	0.005675
74	rs10858917	12	89695013	ATP2B1	LOC338758	intron	A/G	0.79	PP	LHD	0.43(0.09)	0.16(0.18)	1.12e-08	54785	0.32(0.08)	-0.11(0.13)	2.69e-05	107046	0.37(0.06)	-0.04(0.10)	1.82e-12	161831	0.0875
75	rs10745512	12	89712305	LINC00936*	LOC338758	downstream-500B	T/C	0.82	PP	LHD	0.35(0.10)	0.38(0.20)	6.03e-07	54442	0.34(0.08)	-0.16(0.14)	4.79e-05	107046	0.34(0.06)	-0.02(0.11)	6.03e-10	161488	0.0288
75	rs1980235	12	89717005	LINC00936	LOC338758		A/G	0.68	DBP	LHD	0.30(0.08)	0.15(0.15)	2.09e-06	54785	0.27(0.07)	-0.08(0.11)	1.95e-05	107530	0.29(0.05)	-0.02(0.09)	8.51e-11	162315	0.235
75	rs1980235	12	89717005	LINC00936	LOC338758		A/G	0.68	MAP	LHD	0.39(0.08)	0.20(0.17)	1.62e-08	54785	0.36(0.08)	-0.14(0.12)	6.61e-07	106763	0.38(0.06)	-0.04(0.10)	3.02e-14	161548	0.111
75	rs1980235	12	89717005	LINC00936	LOC338758		A/G	0.68	SBP	LHD	0.55(0.12)	0.32(0.24)	6.92e-09	54785	0.55(0.11)	-0.23(0.17)	1.51e-07	107532	0.55(0.08)	-0.06(0.14)	4.07e-15	162317	0.0889
75	rs7299436	12	89719293	LINC00936	LOC338758		T/G	0.85	DBP	CURD	0.53(0.12)	-0.13(0.15)	1.86e-09	90691	0.35(0.11)	-0.04(0.12)	2.63e-13	269809	0.43(0.08)	-0.10(0.09)	2.69e-22	360500	0.378
75	rs7299436	12	89719293	LINC00936	LOC338758		T/G	0.85	MAP	CURD	0.61(0.14)	-0.07(0.16)	6.46e-12	90691	0.45(0.13)	-0.23(0.14)	3.55e-07	269805	0.52(0.09)	-0.22(0.10)	4.27e-17	360496	0.00582
75	rs7299436	12	89719293	LINC00936	LOC338758		T/G	0.85	PP	CURD	0.20(0.14)	0.25(0.17)	9.55e-07	90691	0.31(0.13)	0.05(0.14)	1.55e-12	264397	0.26(0.09)	0.12(0.10)	1.12e-18	355088	0.526
75	rs7299436	12	89719293	LINC00936	LOC338758		T/G	0.85	SBP	CURD	0.73(0.20)	0.09(0.24)	9.12e-12	90691	0.69(0.19)	-0.04(0.20)	1.74e-19	269807	0.71(0.14)	-0.01(0.15)	3.8e-31	360498	0.532
76	rs10774624	12	111395984	LOC105369984	SH2B3	upstream-2KB	A/G	0.5	DBP	CURD	-0.42(0.09)	0.08(0.11)	7.59e-12	89036	-0.42(0.08)	-0.02(0.09)	1.05e-43	264001	-0.42(0.06)	0.00(0.07)	2.88e-55	353037	0.343
76	rs10774624	12	111395984	LOC105369984	SH2B3	upstream-2KB	A/G	0.5	DBP	LHD	-0.37(0.07)	0.12(0.15)	5.25e-07	53261	-0.45(0.06)	0.07(0.11)	8.32e-16	101286	-0.42(0.05)	0.07(0.09)	3.8e-22	154547	0.507
76	rs10774624	12	111395984	LOC105369984	SH2B3	upstream-2KB	A/G	0.5	MAP	CURD	-0.44(0.10)	0.07(0.12)	1.18e-10	89036	-0.20(0.09)	0.00(0.10)	4.79e-07	263997	-0.30(0.07)	0.07(0.08)	5.25e-16	353033	0.0157
76	rs10774624	12	111395984	LOC105369984	SH2B3	upstream-2KB	A/G	0.5	MAP	LHD	-0.39(0.08)	0.09(0.17)	1.2e-06	53261	-0.46(0.07)	0.05(0.12)	4.68e-13	100519	-0.43(0.05)	0.05(0.10)	3.39e-19	153780	0.686
76	rs10774624	12	111395984	LOC105369984	SH2B3	upstream-2KB	A/G	0.5	SBP	CURD	-0.50(0.15)	0.05(0.17)	7.24e-08	89036	-0.39(0.14)	-0.14(0.15)	1.12e-21	263999	-0.44(0.10)	-0.07(0.11)	3.24e-29	353035	0.662
77	rs7310615	12	111427245	SH2B3*		intron	C/G	0.49	DBP	CURD	0.40(0.09)	-0.06(0.11)	5.75e-12	86264	0.43(0.08)	0.02(0.09)	2.95e-46	264001	0.42(0.06)	0.00(0.07)	6.61e-58	350265	0.305
77	rs7310615	12	111427245	SH2B3		intron	C/G	0.5	DBP	LHD	0.39(0.07)	-0.15(0.15)	6.61e-08	51847	0.45(0.06)	-0.08(0.10)	3.47e-16	101286	0.43(0.05)	-0.09(0.08)	1.48e-23	153133	0.596
77	rs7310615	12	111427245	SH2B3		intron	C/G	0.49	MAP	CURD	0.41(0.10)	-0.04(0.12)	1.15e-10	86264	0.22(0.09)	-0.04(0.10)	3.98e-07	263997	0.31(0.07)	-0.07(0.08)	3.47e-16	350261	0.0186
77	rs7310615	12	111427245	SH2B3		intron	C/G	0.5	MAP	LHD	0.42(0.08)	-0.13(0.16)	2e-07	51847	0.46(0.07)	-0.07(0.12)	4.79e-13	100519	0.44(0.05)	-0.08(0.10)	4.57e-20	152366	0.771
77	rs7310615	12	111427245	SH2B3		intron	C/G	0.49	SBP	CURD	0.45(0.15)	0.01(0.17)	8.51e-08	86264	0.42(0.14)	0.11(0.15)	1.15e-22	263999	0.43(0.10)	0.08(0.11)	2.88e-30	350263	0.77
77	rs7310615	12	111427245	SH2B3		intron	C/G	0.5	SBP	LHD	0.50(0.11)	-0.08(0.23)	4.9e-06	51847	0.51(0.10)	-0.05(0.17)	1.78e-08	101288	0.51(0.08)	-0.06(0.13)	4.37e-14	153135	0.989
78	rs4766578	12	111466567	ATXN2*		intron	A/T	0.5	MAP	LHD	-0.42(0.08)	0.11(0.16)	1.51e-07	51847	-0.37(0.07)	-0.03(0.12)	8.13e-11	105981	-0.39(0.05)	0.02(0.09)	5.75e-18	157828	0.757
78	rs4766578	12	111466567	ATXN2		intron	A/T	0.5	SBP	LHD	-0.51(0.11)	0.07(0.23)	3.09e-06	51847	-0.45(0.10)	-0.05(0.17)	4.9e-08	106752	-0.48(0.07)	-0.01(0.13)	8.32e-14	158599	0.883
78	rs35350651	12	111469627	ATXN2		intron	D/I	0.5	DBP	CURD	0.44(0.09)	-0.08(0.11)	3.02e-13	85860	0.51(0.13)	-0.02(0.13)	4.07e-37	170642	0.47(0.07)	-0.02(0.08)	6.17e-50	256502	0.165
78	rs35350651	12	111469627	ATXN2		intron	D/I	0.5	SBP	CURD	0.54(0.15)	-0.06(0.17)	4.17e-09	85860	0.38(0.22)	0.21(0.23)	2.24e-18	170638	0.49(0.12)	0.06(0.13)	3.8e-27	256498	0.511
78	rs7137828	12	111494996	ATXN2		intron	T/C	0.51	DBP	LHD	-0.40(0.07)	0.15(0.15)	5.89e-08	51847	-0.47(0.06)	0.09(0.10)	1e-16	101286	-0.44(0.05)	0.10(0.08)	4.27e-24	153133	0.561
79	rs11065979	12	111621753	BRAP*			T/C	0.45	DBP	CURD	0.39(0.09)	-0.08(0.11)	3.39e-10	89036	0.37(0.08)	0.03(0.09)	1.41e-35	264001	0.38(0.06)	0.00(0.07)	1.66e-45	353037	0.454
79	rs11065979	12	111621753	BRAP			T/C	0.45	DBP	LHD	0.36(0.07)	-0.06(0.15)	5.62e-07	53261	0.43(0.06)	-0.04(0.11)	1e-14	101286	0.40(0.05)	-0.03(0.09)	3.72e-21	154547	0.691
79	rs11065979	12	111621753	BRAP			T/C	0.45	MAP	CURD	0.40(0.10)	-0.06(0.12)	8.13e-09	89036	0.15(0.09)	0.01(0.10)	0.000102	263997	0.26(0.07)	-0.06(0.08)	1.23e-11	353033	0.0131
79	rs11065979	12	111621753	BRAP			T/C	0.45	MAP	LHD	0.38(0.08)	-0.07(0.17)	3.39e-06	53261	0.41(0.07)	-0.01(0.12)	7.76e-11	100519	0.40(0.05)	-0.03(0.10)	1.35e-16	153780	0.855
79	rs11065979	12	111621753	BRAP			T/C	0.45	SBP	CURD	0.45(0.15)	-0.04(0.18)	2.14e-06	89036	0.30(0.14)	0.17(0.15)	2.14e-16	263999	0.37(0.10)	0.08(0.11)	2.14e-22	353035	0.67
80	rs4766897	12	111741667	ACAD10		intron	T/C	0.34	DBP	CURD	0.37(0.12)	-0.04(0.14)	1.48e-06	85019	0.40(0.10)	-0.06(0.10)	2.75e-22	256513	0.39(0.07)	-0.05(0.08)	1.15e-28	341532	0.965
81	rs2013002	12	111762346	ALDH2			T/C	0.44	DBP	CURD	0.36(0.09)	-0.06(0.11)	2.57e-08	89036	0.36(0.08)	0.02(0.09)	3.02e-31	264001	0.36(0.06)	-0.00(0.07)	4.07e-39	353037	0.483
81	rs2013002	12	111762346	ALDH2			T/C	0.45	DBP	LHD	0.33(0.07)	-0.02(0.15)	9.12e-06	53261	0.43(0.07)	-0.03(0.11)	2.51e-14	101286	0.38(0.05)	-0.01(0.09)	2.24e-19	154547	0.527
81	rs2013002	12	111762346	ALDH2			T/C	0.44	MAP	CURD	0.36(0.11)	-0.05(0.13)	3.72e-07	89036	0.12(0.10)	0.02(0.10)	0.000603	263997	0.23(0.07)	-0.04(0.08)	2.46e-09	353033	0.0267
82	rs11513729	12	111835695	MAPKAPK5-AS1			T/C	0.44	DBP	CURD	0.35(0.10)	-0.05(0.12)	5.25e-08	89036	0.36(0.09)	0.02(0.09)	2.63e-30	264001	0.36(0.06)	0.00(0.07)	6.46e-38	353037	0.525
82	rs11513729	12	111835695	MAPKAPK5-AS1			T/C	0.44	DBP	LHD	0.35(0.08)	-0.05(0.16)	6.31e-06	53261	0.42(0.07)	-0.02(0.11)	1.02e-13	101286	0.39(0.05)	-0.02(0.09)	5.37e-19	154547	0.607
82	rs11513729	12	111835695	MAPKAPK5-AS1			T/C	0.44	MAP	CURD	0.35(0.11)	-0.04(0.13)	6.46e-07	89036	0.13(0.10)	0.02(0.11)	0.000724	263997	0.23(0.07)	-0.04(0.08)	4.37e-09	353033	0.0307
83	rs17696736	12	112049014	NAA25		intron	A/G	0.56	DBP	CURD	-0.33(0.09)	0.07(0.11)	1.26e-07	84958	-0.28(0.08)	-0.06(0.09)	3.89e-26	275235	-0.31(0.06)	-0.01(0.07)	2.88e-33	360193	0.449
83	rs17696736	12	112049014	NAA25		intron	A/G	0.56	SBP	CURD	-0.45(0.15)	0.10(0.17)	7.41e-06	84958	-0.21(0.14)	-0.21(0.15)	5.25e-14	275177	-0.33(0.10)	-0.08(0.11)	4.68e-19	360135	0.403
84	rs17630235	12	112153882	TRAFD1		downstream-500B	A/G	0.43	DBP	CURD	0.29(0.09)	0.00(0.11)	2.4e-07	90691	0.30(0.08)	0.07(0.09)	2.57e-28	264318	0.29(0.06)	0.05(0.07)	3.31e-35	355009	0.531
84	rs17630235	12	112153882	TRAFD1		downstream-500B	A/G	0.43	DBP	LHD	0.32(0.07)	-0.00(0.15)	7.24e-06	54785	0.36(0.06)	0.08(0.11)	3.24e-13	101860	0.34(0.05)	0.06(0.09)	1.86e-18	156645	0.654
84	rs17630235	12	112153882	TRAFD1		downstream-500B	A/G	0.43	MAP	CURD	0.31(0.10)	0.00(0.12)	8.32e-07	90691	0.07(0.10)	0.06(0.10)	0.00129	264253	0.18(0.07)	-0.00(0.08)	1.41e-08	354944	0.0228
85	rs7953257	12	112246417	HECTD4		intron	A/T	0.44	DBP	CURD	0.33(0.10)	-0.03(0.11)	7.08e-08	90691	0.38(0.08)	-0.00(0.09)	4.17e-30	264001	0.36(0.06)	0.00(0.07)	1.35e-37	354692	0.542
85	rs7953257	12	112246417	HECTD4		intron	A/T	0.45	DBP	LHD	0.35(0.08)	-0.07(0.16)	6.46e-06	54785	0.41(0.07)	0.01(0.11)	1.41e-13	101286	0.38(0.05)	-0.01(0.09)	8.13e-19	156071	0.569
85	rs7953257	12	112246417	HECTD4		intron	A/T	0.44	MAP	CURD	0.34(0.11)	-0.03(0.13)	6.46e-07	90691	0.13(0.10)	0.01(0.11)	0.000692	263997	0.23(0.07)	-0.04(0.08)	3.72e-09	354688	0.0342
86	rs35444	12	115114632	LOC102723639*	TBX3		A/G	0.61	SBP	CURD	0.43(0.15)	0.03(0.17)	1.95e-07	84958	0.44(0.13)	0.02(0.15)	5.75e-18	269908	0.43(0.10)	0.03(0.11)	3.16e-25	354866	0.996
86	rs35441	12	115115310	LOC102723639	TBX3		T/C	0.39	DBP	CURD	-0.19(0.09)	-0.09(0.11)	3.02e-06	90691	-0.39(0.08)	0.12(0.09)	2.09e-18	261532	-0.29(0.06)	0.03(0.07)	8.32e-24	352223	0.253
86	rs35441	12	115115310	LOC102723639	TBX3		T/C	0.39	MAP	CURD	-0.27(0.10)	-0.06(0.12)	1.15e-07	90691	-0.31(0.09)	0.10(0.10)	7.24e-09	261528	-0.29(0.07)	0.05(0.08)	9.55e-16	352219	0.216
86	rs35441	12	115115310	LOC102723639	TBX3		T/C	0.39	MAP	LHD	-0.34(0.08)	-0.08(0.16)	1.45e-06	54785	-0.33(0.07)	0.10(0.12)	1.59e-06	100629	-0.34(0.05)	0.04(0.09)	1.82e-12	155414	0.527
86	rs35441	12	115115310	LOC102723639	TBX3		T/C	0.39	SBP	LHD	-0.46(0.11)	-0.07(0.22)	7.08e-06	54785	-0.47(0.10)	0.23(0.17)	6.61e-06	101398	-0.47(0.08)	0.13(0.13)	4.9e-11	156183	0.496
86	rs1579381	12	115118002	LOC102723639	TBX3		C/G	0.89	DBP	LHD	0.58(0.13)	0.06(0.26)	1.7e-06	46213	0.55(0.10)	-0.29(0.17)	1.07e-07	102447	0.56(0.08)	-0.20(0.14)	2.69e-13	148660	0.333
87	rs35206230	15	74805439	CSK*			T/C	0.66	DBP	CURD	-0.29(0.09)	0.00(0.11)	6.61e-08	90689	-0.42(0.08)	0.09(0.09)	1.38e-26	271417	-0.36(0.06)	0.04(0.07)	4.47e-34	362106	0.504
87	rs35206230	15	74805439	CSK			T/C	0.66	DBP	LHD	-0.31(0.07)	-0.02(0.15)	4.57e-06	54784	-0.25(0.06)	-0.07(0.10)	2.46e-07	107530	-0.28(0.05)	-0.04(0.08)	7.08e-13	162314	0.796
87	rs35206230	15	74805439	CSK			T/C	0.66	MAP	CURD	-0.31(0.10)	-0.04(0.12)	2.4e-08	90689	-0.39(0.09)	0.26(0.10)	2.19e-07	271413	-0.35(0.07)	0.16(0.08)	7.24e-14	362102	0.0164
87	rs35206230	15	74805439	CSK			T/C	0.66	MAP	LHD	-0.36(0.08)	-0.06(0.16)	7.94e-07	54784	-0.31(0.07)	0.01(0.12)	4.79e-07	106763	-0.33(0.05)	-0.01(0.09)	2.14e-13	161547	0.722
87	rs35206230	15	74805439	CSK			T/C	0.66	SBP	CURD	-0.34(0.15)	-0.16(0.17)	9.55e-08	90689	-0.58(0.14)	0.14(0.15)	1.51e-17	271415	-0.47(0.10)	0.01(0.11)	8.71e-25	362104	0.421
87	rs35206230	15	74805439	CSK			T/C	0.66	SBP	LHD	-0.51(0.11)	-0.10(0.22)	3.63e-07	54784	-0.42(0.10)	0.08(0.17)	9.12e-06	107532	-0.46(0.07)	0.04(0.13)	3.16e-12	162316	0.436
88	rs34862454	15	74809189	*LMAN1L			T/C	0.66	DBP	LHD	-0.31(0.07)	-0.02(0.15)	6.17e-06	54784	-0.25(0.06)	-0.06(0.10)	3.39e-07	107530	-0.28(0.05)	-0.04(0.08)	1.29e-12	162314	0.826
88	rs11636952	15	74821981	LMAN1L		intron	T/C	0.32	DBP	CURD	0.29(0.09)	0.01(0.11)	8.32e-08	90689	0.38(0.08)	-0.01(0.09)	1.48e-28	271417	0.34(0.06)	0.01(0.07)	6.31e-36	362106	0.502
88	rs11636952	15	74821981	LMAN1L		intron	T/C	0.32	MAP	CURD	0.31(0.10)	0.05(0.12)	1.29e-08	90689	0.38(0.09)	-0.21(0.10)	4.47e-08	271413	0.35(0.07)	-0.13(0.08)	3.72e-15	362102	0.0321
88	rs11636952	15	74821981	LMAN1L		intron	T/C	0.32	MAP	LHD	0.38(0.08)	-0.01(0.16)	8.51e-07	54784	0.36(0.07)	-0.03(0.12)	8.71e-09	106763	0.37(0.05)	-0.02(0.10)	3.09e-15	161547	0.961
88	rs11636952	15	74821981	LMAN1L		intron	T/C	0.32	SBP	CURD	0.35(0.15)	0.18(0.18)	2.4e-08	90689	0.56(0.14)	-0.08(0.15)	6.46e-20	271415	0.46(0.10)	0.04(0.11)	7.94e-28	362104	0.532
88	rs11636952	15	74821981	LMAN1L		intron	T/C	0.32	SBP	LHD	0.55(0.11)	-0.01(0.23)	2.57e-07	54784	0.49(0.10)	-0.10(0.17)	2.88e-07	107532	0.52(0.08)	-0.08(0.13)	4.27e-14	162316	0.738
89	rs3935077	15	74827870	CPLX3*		intron	C/G	0.28	DBP	CURD	0.30(0.10)	-0.01(0.11)	4.27e-07	90689	0.33(0.08)	0.01(0.09)	1.15e-23	268878	0.32(0.06)	0.02(0.07)	1.95e-30	359567	0.712
89	rs3935077	15	74827870	CPLX3		intron	C/G	0.28	MAP	CURD	0.32(0.11)	0.02(0.13)	1.38e-07	90689	0.29(0.10)	-0.15(0.11)	0.0001	268874	0.30(0.07)	-0.11(0.08)	1.26e-10	359563	0.0289
89	rs6495122	15	74833304	CPLX3			A/C	0.43	MAP	LHD	0.35(0.07)	-0.09(0.15)	4.57e-06	54784	0.21(0.07)	0.11(0.11)	1.32e-05	112225	0.27(0.05)	0.03(0.09)	7.41e-11	167009	0.372
89	rs6495122	15	74833304	CPLX3			A/C	0.43	SBP	CURD	0.31(0.14)	0.14(0.16)	3.02e-07	90689	0.43(0.13)	-0.07(0.14)	2.82e-13	280054	0.37(0.10)	0.01(0.11)	5.01e-20	370743	0.554
89	rs6495122	15	74833304	CPLX3			A/C	0.43	SBP	LHD	0.49(0.10)	-0.06(0.21)	1.38e-06	54784	0.29(0.10)	0.05(0.16)	0.000316	112996	0.38(0.07)	-0.01(0.13)	6.46e-10	167780	0.315
90	rs2290574	15	74843106	ULK3		nc-transcript	T/C	0.27	DBP	CURD	0.29(0.10)	0.00(0.12)	7.94e-07	90689	0.27(0.09)	0.08(0.09)	5.89e-24	268878	0.28(0.06)	0.06(0.07)	2.29e-30	359567	0.653
90	rs2290574	15	74843106	ULK3		nc-transcript	T/C	0.27	MAP	CURD	0.31(0.11)	0.02(0.13)	5.01e-07	90689	0.20(0.10)	-0.05(0.11)	0.000234	268874	0.25(0.07)	-0.05(0.08)	6.76e-10	359563	0.0507
90	rs2290574	15	74843106	ULK3		nc-transcript	T/C	0.27	SBP	CURD	0.34(0.16)	0.12(0.19)	3.89e-06	90689	0.46(0.15)	0.02(0.16)	3.16e-17	268876	0.41(0.11)	0.07(0.12)	4.79e-23	359565	0.836
91	rs12902690	15	74847355	SCAMP2*		intron	A/G	0.34	DBP	CURD	0.30(0.09)	-0.02(0.11)	1.62e-07	90689	0.37(0.08)	-0.00(0.09)	2.51e-29	271417	0.34(0.06)	0.01(0.07)	2.46e-36	362106	0.436
91	rs3765066	15	74848513	SCAMP2		intron	A/G	0.67	MAP	CURD	-0.31(0.10)	-0.02(0.12)	7.59e-08	90689	-0.33(0.09)	0.16(0.10)	6.46e-08	271413	-0.32(0.07)	0.11(0.08)	1.12e-14	362102	0.112
91	rs3765066	15	74848513	SCAMP2		intron	A/G	0.67	SBP	CURD	-0.35(0.15)	-0.13(0.18)	2.51e-07	90689	-0.51(0.14)	0.00(0.15)	1.2e-20	271415	-0.43(0.10)	-0.06(0.11)	1.2e-27	362104	0.715
91	rs12900662	15	74863321	SCAMP2		intron	T/C	0.45	DBP	LHD	0.33(0.07)	-0.14(0.14)	2.51e-06	54784	0.22(0.06)	0.10(0.10)	2.63e-07	107530	0.27(0.05)	0.01(0.08)	9.55e-13	162314	0.335
91	rs12900662	15	74863321	SCAMP2		intron	T/C	0.45	MAP	LHD	0.38(0.07)	-0.10(0.15)	5.75e-07	54784	0.28(0.07)	0.03(0.11)	6.17e-07	106763	0.33(0.05)	-0.02(0.09)	2.29e-13	161547	0.615
91	rs4643278	15	74865241	SCAMP2		intron	T/C	0.55	SBP	LHD	-0.53(0.10)	0.07(0.21)	2.04e-07	54784	-0.38(0.10)	0.05(0.16)	2.4e-05	107532	-0.45(0.07)	0.08(0.13)	4.27e-12	162316	0.481
92	rs71140107	15	74883756	MPI*			D/I	0.46	DBP	CURD	0.16(0.09)	0.16(0.11)	4.47e-07	89034	0.22(0.11)	0.12(0.12)	9.33e-19	194421	0.18(0.07)	0.15(0.08)	2.24e-25	283455	0.874
92	rs71140107	15	74883756	MPI			D/I	0.46	DBP	LHD	0.36(0.07)	-0.05(0.15)	5.13e-07	53260	0.29(0.08)	0.08(0.14)	7.08e-06	56776	0.33(0.05)	0.02(0.10)	2.09e-12	110036	0.778
92	rs71140107	15	74883756	MPI			D/I	0.46	MAP	LHD	0.40(0.08)	-0.01(0.16)	2.34e-07	53260	0.33(0.10)	0.06(0.16)	1.18e-05	56776	0.37(0.06)	0.02(0.11)	1.18e-12	110036	0.862
92	rs12913293	15	74892117	MPI		intron	C/G	0.55	MAP	CURD	-0.20(0.09)	-0.13(0.11)	1.74e-07	90689	-0.23(0.09)	0.06(0.10)	1.15e-06	271413	-0.21(0.06)	0.00(0.07)	7.24e-13	362102	0.075
92	rs12913293	15	74892117	MPI		intron	C/G	0.55	SBP	CURD	-0.21(0.14)	-0.26(0.16)	3.02e-07	90689	-0.32(0.13)	-0.08(0.14)	1.78e-14	271415	-0.26(0.09)	-0.16(0.11)	2.4e-21	362104	0.685
92	rs12913293	15	74892117	MPI		intron	C/G	0.55	SBP	LHD	-0.53(0.10)	0.12(0.21)	2.09e-07	54784	-0.37(0.10)	0.03(0.16)	2.69e-05	107532	-0.45(0.07)	0.09(0.13)	5.13e-12	162316	0.463
93	rs8025447	15	74899881	FAM219B*		downstream-500B	T/G	0.44	DBP	LHD	0.34(0.07)	-0.15(0.14)	1.86e-06	54784	0.22(0.06)	0.12(0.10)	8.13e-08	107530	0.27(0.04)	0.02(0.08)	2.95e-13	162314	0.239
93	rs8025447	15	74899881	FAM219B		downstream-500B	T/G	0.44	MAP	LHD	0.38(0.07)	-0.13(0.15)	4.17e-07	54784	0.27(0.07)	0.07(0.11)	2.63e-07	106763	0.32(0.05)	-0.01(0.09)	9.12e-14	161547	0.466
93	rs8025447	15	74899881	FAM219B		downstream-500B	T/G	0.44	SBP	LHD	0.54(0.10)	-0.14(0.21)	1.91e-07	54784	0.36(0.10)	-0.01(0.16)	3.72e-05	107532	0.44(0.07)	-0.08(0.13)	7.08e-12	162316	0.411
93	rs4886636	15	74903835	FAM219B		intron	A/G	0.56	DBP	CURD	-0.19(0.08)	-0.08(0.10)	6.76e-07	90689	-0.17(0.08)	-0.13(0.08)	2.69e-20	271417	-0.18(0.06)	-0.11(0.06)	6.31e-27	362106	0.917
93	rs4886636	15	74903835	FAM219B		intron	A/G	0.56	MAP	CURD	-0.19(0.09)	-0.13(0.11)	2e-07	90689	-0.22(0.09)	0.05(0.10)	2.46e-06	271413	-0.21(0.06)	-0.00(0.07)	1.74e-12	362102	0.0757
93	rs4886636	15	74903835	FAM219B		intron	A/G	0.56	SBP	CURD	-0.21(0.14)	-0.26(0.16)	3.63e-07	90689	-0.30(0.13)	-0.10(0.14)	3.39e-14	271415	-0.25(0.09)	-0.16(0.11)	5.62e-21	362104	0.729
94	rs11072512	15	74911685	LOC105370898	FAM219B		T/C	0.55	SBP	LHD	-0.53(0.10)	0.13(0.21)	3.39e-07	54784	-0.31(0.09)	-0.03(0.16)	0.000123	112996	-0.41(0.07)	0.05(0.12)	6.46e-11	167780	0.28
94	rs71140112	15	74914347	LOC105370898	FAM219B		D/I	0.5	DBP	CURD	0.22(0.09)	0.08(0.11)	3.55e-07	88630	0.97(0.24)	-0.65(0.27)	5.89e-06	23891	0.32(0.09)	-0.01(0.10)	4.47e-11	112521	0.0136
94	rs71140112	15	74914347	LOC105370898	FAM219B		D/I	0.5	MAP	CURD	0.21(0.10)	0.15(0.12)	2.51e-07	88630	1.19(0.27)	-0.81(0.30)	8.91e-07	23891	0.33(0.10)	0.03(0.11)	1.91e-11	112521	0.00311
94	rs12907898	15	74915531	LOC105370898	COX5A		T/C	0.55	SBP	CURD	-0.21(0.14)	-0.25(0.16)	4.79e-07	90689	-0.30(0.13)	-0.08(0.14)	1.82e-13	271415	-0.26(0.10)	-0.15(0.11)	4.27e-20	362104	0.687
95	rs7497026	15	74916208	COX5A*			T/C	0.45	DBP	LHD	0.35(0.07)	-0.16(0.14)	1.2e-06	54784	0.22(0.06)	0.12(0.10)	1.02e-07	107530	0.28(0.05)	0.02(0.08)	2.69e-13	162314	0.218
95	rs7497026	15	74916208	COX5A			T/C	0.45	MAP	LHD	0.40(0.07)	-0.13(0.15)	2.69e-07	54784	0.27(0.07)	0.07(0.11)	4.37e-07	106763	0.33(0.05)	-0.01(0.09)	1.07e-13	161547	0.414
95	rs7497026	15	74916208	COX5A			T/C	0.45	SBP	CURD	0.25(0.14)	0.24(0.17)	1.26e-07	90689	0.29(0.13)	0.11(0.14)	1.38e-13	271415	0.27(0.10)	0.15(0.11)	7.94e-21	362104	0.656
95	rs12899430	15	74936759	COX5A		intron	T/C	0.47	SBP	LHD	0.57(0.11)	-0.13(0.22)	1.2e-07	54784	0.36(0.10)	-0.05(0.16)	7.76e-05	107532	0.46(0.07)	-0.11(0.13)	1.23e-11	162316	0.312
95	rs11072518	15	74942269	COX5A			T/C	0.36	DBP	CURD	0.33(0.09)	-0.05(0.11)	5.89e-08	90689	0.25(0.08)	0.07(0.09)	3.55e-23	271417	0.29(0.06)	0.03(0.07)	9.12e-31	362106	0.635
95	rs11072518	15	74942269	COX5A			T/C	0.36	MAP	CURD	0.34(0.10)	-0.00(0.12)	2.51e-08	90689	0.23(0.09)	-0.06(0.10)	4.07e-06	271413	0.28(0.07)	-0.07(0.08)	4.17e-13	362102	0.0547
96	rs34063670	15	74954815	RPP25		downstream-500B	C/G	0.5	SBP	CURD	0.27(0.15)	0.16(0.17)	7.41e-06	87917	0.29(0.13)	-0.01(0.14)	1.7e-07	271415	0.28(0.10)	0.04(0.11)	1.51e-12	359332	0.349
97	rs4932370	15	90861475	FURIN*			A/G	0.33	DBP	CURD	0.30(0.10)	0.08(0.12)	1.45e-08	75566	0.20(0.08)	0.09(0.09)	1.45e-17	271942	0.24(0.06)	0.07(0.07)	1.12e-25	347508	0.418
97	rs2071410	15	90877710	FURIN		intron	C/G	0.68	MAP	CURD	-0.34(0.12)	-0.15(0.14)	8.13e-10	75566	-0.30(0.10)	0.05(0.11)	2.88e-10	263243	-0.32(0.08)	0.02(0.08)	1.95e-18	338809	0.022
97	rs2071410	15	90877710	FURIN		intron	C/G	0.68	SBP	CURD	-0.38(0.17)	-0.33(0.21)	5.25e-09	75566	-0.55(0.15)	-0.13(0.16)	8.71e-32	263245	-0.48(0.11)	-0.21(0.12)	1.35e-40	338811	0.743
97	rs1573643	15	90877743	FURIN		intron	T/C	0.67	MAP	LHD	-0.57(0.10)	0.02(0.22)	4.07e-09	43297	-0.45(0.08)	-0.08(0.13)	3.89e-14	96604	-0.50(0.06)	-0.04(0.11)	6.92e-23	139901	0.672
97	rs1573643	15	90877743	FURIN		intron	T/C	0.67	SBP	LHD	-0.82(0.14)	0.02(0.32)	1.48e-09	43297	-0.64(0.11)	-0.05(0.18)	6.31e-13	97373	-0.71(0.09)	-0.00(0.15)	5.37e-22	140670	0.576
97	rs6227	15	90882002	FURIN		utr-3	T/C	0.32	DBP	LHD	0.45(0.09)	-0.04(0.20)	2.95e-07	43297	0.36(0.07)	0.08(0.11)	2.46e-12	102316	0.39(0.05)	0.04(0.09)	4.57e-19	145613	0.687
98	rs12906125	15	90884382	FES*		upstream-2KB	A/G	0.33	SBP	CURD	0.32(0.18)	0.41(0.21)	6.61e-09	75566	0.55(0.15)	0.13(0.16)	2.63e-29	246790	0.45(0.12)	0.24(0.13)	7.41e-38	322356	0.573
98	rs12906125	15	90884382	FES		upstream-2KB	A/G	0.33	SBP	LHD	0.82(0.14)	0.06(0.33)	3.55e-09	43297	0.61(0.12)	0.09(0.19)	5.75e-11	87874	0.69(0.09)	0.04(0.16)	1.51e-19	131171	0.444
98	rs1894400	15	90885725	FES		intron	T/C	0.32	DBP	LHD	0.45(0.09)	-0.02(0.20)	2.69e-07	43297	0.37(0.07)	0.08(0.11)	1.18e-12	97371	0.40(0.05)	0.04(0.10)	1.7e-19	140668	0.788
98	rs1894400	15	90885725	FES		intron	T/C	0.32	MAP	LHD	0.56(0.10)	-0.03(0.22)	6.17e-09	43297	0.46(0.08)	0.08(0.13)	2.46e-14	96604	0.50(0.06)	0.04(0.11)	6.31e-23	139901	0.703
98	rs2521501	15	90894158	FES		downstream-500B	A/T	0.67	DBP	CURD	-0.27(0.11)	-0.12(0.13)	3.8e-08	75566	-0.26(0.09)	-0.10(0.09)	3.09e-23	263247	-0.26(0.07)	-0.10(0.07)	3.31e-31	338813	0.846
98	rs2521501	15	90894158	FES		downstream-500B	A/T	0.67	MAP	CURD	-0.30(0.12)	-0.20(0.15)	1.95e-09	75566	-0.34(0.10)	0.08(0.11)	4.47e-11	263243	-0.32(0.08)	0.02(0.09)	6.92e-19	338809	0.0248
99	rs7209400	17	49372695	LOC102724596	ZNF652	intron	T/C	0.55	DBP	CURD	0.19(0.08)	0.07(0.10)	6.76e-06	90690	0.31(0.08)	-0.11(0.09)	5.01e-12	261809	0.25(0.06)	-0.04(0.06)	3.31e-17	352499	0.38
99	rs7209400	17	49372695	LOC102724596	ZNF652	intron	T/C	0.55	DBP	LHD	0.33(0.07)	-0.17(0.14)	6.92e-06	54784	0.20(0.06)	0.02(0.10)	0.000138	101850	0.26(0.05)	-0.06(0.08)	1.51e-09	156634	0.323
100	rs4277405	17	63471557	ACE*			T/C	0.62	DBP	CURD	-0.45(0.09)	0.24(0.11)	3.72e-08	90691	-0.21(0.08)	0.08(0.09)	1.2e-05	261809	-0.32(0.06)	0.17(0.07)	1.2e-12	352500	0.0918
100	rs4277405	17	63471557	ACE			T/C	0.62	SBP	CURD	-0.66(0.15)	0.28(0.18)	4.37e-08	90691	-0.31(0.14)	0.08(0.16)	1.32e-05	261807	-0.48(0.10)	0.21(0.12)	1.74e-12	352498	0.0883
101	rs12978472	19	7257979	INSR		intron	C/G	0.89	DBP	CURD	0.52(0.17)	0.04(0.21)	1.59e-06	63712	0.38(0.14)	0.14(0.15)	6.76e-23	252528	0.43(0.11)	0.09(0.12)	3.89e-29	316240	0.774
101	rs12978472	19	7257979	INSR*		intron	C/G	0.89	MAP	CURD	0.63(0.19)	0.08(0.24)	6.03e-08	63712	0.50(0.16)	-0.26(0.17)	7.08e-06	252524	0.55(0.12)	-0.24(0.13)	1.51e-11	316236	0.0071
101	rs12978472	19	7257979	INSR		intron	C/G	0.89	SBP	CURD	0.79(0.28)	0.23(0.34)	1.23e-07	63712	0.89(0.23)	0.04(0.25)	4.68e-27	252526	0.85(0.18)	0.09(0.20)	1.7e-34	316238	0.87
102	rs4260308	20	10981537	C20orf187	LOC339593	intron	A/G	0.37	DBP	CURD	0.37(0.09)	-0.19(0.10)	1.86e-06	90691	0.29(0.08)	-0.05(0.09)	1e-14	263039	0.33(0.06)	-0.10(0.07)	1.15e-20	353730	0.527
103	rs459588	20	59139712	ZNF831*		intron	A/C	0.87	DBP	CURD	-0.52(0.12)	0.08(0.15)	1.66e-10	90691	-0.33(0.11)	-0.05(0.12)	2.57e-16	271417	-0.41(0.08)	0.02(0.09)	1.59e-26	362108	0.392
103	rs79263055	20	59175423	ZNF831		intron	A/T	0.12	MAP	CURD	0.52(0.15)	0.07(0.18)	9.33e-11	90691	0.25(0.14)	-0.05(0.15)	0.000347	269369	0.38(0.10)	-0.07(0.11)	4.37e-12	360060	0.00104
103	rs73306896	20	59175478	ZNF831		intron	T/C	0.12	SBP	CURD	0.56(0.21)	0.23(0.25)	3.55e-09	90691	0.54(0.20)	-0.03(0.22)	1.1e-10	269807	0.55(0.14)	0.04(0.16)	4.37e-19	360498	0.206
The most significant associated SNVs are shown per gene for each Blood Pressure (BP) trait and alcohol status. Abbreviations: Nb, order number based on genes; SNV, single nucleotide variant; Chr, chromosome; Position, Gene, and Role in dbSNP build 150 (hg38) annotation; Role: Intronic, missense, up-stream or downstream, or intergenic (blank space) SNV; Near gene reflects genes at up to +/-500 kb …
