# Supplementary material for: Novel genetic associations for blood pressure identified via gene-alcohol interaction in up to 570K individuals across multiple ancestries
Source: PLoS One. 2018 Jun 18;13(6):e0198166. doi: 10.1371/journal.pone.0198166 (PMC6005576; doi:10.1371/journal.pone.0198166)
Supplement: S11 Table — Variants previously reported for blood pressure (BP) in genome-wide association studies. The most significant associated SNVs are shown per gene for each Blood Pressure (BP) trait and alcohol status. Abbreviations: Nb, order number based on genes; SNV, single nucleotide variant; Chr, chromosome; Position, Gene, and Role in dbSNP build 150 (hg38) annotation; Role: Intronic or intergenic (blank space) SNV; Near gene reflects genes at up to +/-500 kb and related to BP / alcohol; A1/2, Coded and non-coded alleles; Frq1, Frequency of coded allele; Trait, SBP: Systolic BP, DBP: Diastolic BP, MAP: Mean Arterial Pressure, PP: Pulse Pressure; Drink: Alcohol consumption, CURD, Current drinker (yes/no); Stage 1, Discovery cohorts; Stage 2, Replication cohorts; Stage 1 & Stage 2, Discovery and Replication combined; b_M(S.E.), beta coefficient of SNV (standard error); b_I(S.E.): SNV*E is SNV-alcohol interaction effect (standard error); P-Value: modified-interaction METAL P-Value; N, Number of subjects; P-Meta, P-Meta, modified-interaction METAL P-Value of Meta-analysis in combined Stage 1 and Stage 2; Het-P value, Heterogeneity P-Value. * These genes were detected also via correlated meta-analysis. (XLSX) [file pone.0198166.s031.xlsx]

## Sheet: S11 Table. AA
S11 Table. SNVs/genes associated with BP traits in African ancestry. Variants previously reported for blood pressure (BP) in genome-wide association studies.
											Stage 1				Stage 2				Stage 1 and Stage 2
Nb	SNV	Chr	Position	Gene	Near Gene	Role	A1/2	Frq1	Trait	Drink	b_M(S.E.)	b_I(S.E.)	P-Value	N	b_M(S.E.)	b_I(S.E.)	P-Value	N	b_M(S.E.)	b_I(S.E.)	P-Value	N	Het-P value
1	rs17083718	4	53935382	LOC105377655	RPL21P44		A/G	0.84	PP	CURD	1.18(0.26)	-0.37(0.36)	4.365e-07	21419	0.66(0.52)	0.32(0.75)	0.09333	5041	1.07(0.23)	-0.23(0.32)	2.344e-08	26460	0.6424
2	rs28451436	7	27279420	EVX1-AS	EVX1		A/G	0.14	MAP	CURD	0.50(0.26)	0.72(0.37)	8.318e-06	21419	1.70(0.62)	0.01(0.90)	0.0007586	4623	0.68(0.24)	0.61(0.34)	1.738e-08	26042	0.1582
3	rs74328111	12	75841965	LOC105369846	PHLDA1		A/G	0.01	SBP	CURD	-0.33(2.68)	-10.14(3.13)	2.884e-09	8237	-1.73(4.76)	-2.11(5.90)	0.5129	2001	-0.66(2.34)	-8.64(2.76)	1.778e-09	10238	0.22
4	rs117222687	22	19968491	ARVCF	COMT	intron	C/G	0.02	SBP	CURD	-1.01(2.12)	-7.28(2.50)	1.738e-08	9452	9.44(5.34)	-8.49(7.27)	0.2089	2001	0.41(1.97)	-8.06(2.35)	2.754e-08	11453	0.03972
Variants previously reported for blood pressure (BP) in genome-wide association studies. The most significant associated SNVs are shown per gene for each Blood Pressure (BP) trait and alcohol status. Abbreviations: Nb, order number based on genes; SNV, single nucleotide variant; Chr, chromosome; Position, Gene, and Role in dbSNP build 150 (hg38) annotation; Role: Intronic or intergenic (blank spa…
