# Supplementary material for: Novel genetic associations for blood pressure identified via gene-alcohol interaction in up to 570K individuals across multiple ancestries
Source: PLoS One. 2018 Jun 18;13(6):e0198166. doi: 10.1371/journal.pone.0198166 (PMC6005576; doi:10.1371/journal.pone.0198166)
Supplement: S12 Table — Variants previously reported for blood pressure (BP) in genome-wide association studies. The most significant associated SNVs are shown per gene for each Blood Pressure (BP) trait and alcohol status. Abbreviations: Nb, order number based on genes; SNV, single nucleotide variant; Chr, chromosome; Position, Gene, and Role in dbSNP build 150 (hg38) annotation; Role: Intronic, missense, up-stream or downstream, or intergenic (blank space) SNV; Near gene reflects genes at up to +/-500 kb and related to BP / alcohol; A1/2, Coded and non-coded alleles; Frq1, Frequency of coded allele; Ancestry, EA: European Ancestry, AA: African American Ancestry, ASA: Asian American Ancestry, HA: Hispanic Ancestry; Trait, SBP: Systolic BP, DBP: Diastolic BP, MAP: Mean Arterial Pressure, PP: Pulse Pressure; Drink: Alcohol consumption, CURD, Current drinker (yes/no), LHD, Light(1–7 drinks/week) or heavy (≥8 drinks/week) drinker; Stage 1 and Stage 2, Combined Discovery and Replication; b_M, beta coefficient of SNV; b_I: SNV*E is SNV-alcohol interaction effect; P-Value, modified-interaction METAL P-Value of meta-analysis in combined Stage 1 and Stage 2; N, Number of subjects; Het-P value, Heterogeneity P-Value. (XLSX) [file pone.0198166.s032.xlsx]

## Sheet: S12 Table. Combined Ancestry
S12 Table. SNVs/genes associated with BP traits in multi-ancestry meta-analysis in combined Stage 1 and Stage 2. Variants previously reported for blood pressure (BP) in genome-wide association studies.
												Stage 1 and Stage 2
Nb	SNV	Chr	Position	Gene	Near Gene	Role	A1/2	Frq1	Ancestry	Trait	Drink	b_M(S.E.)	b_I(S.E.)	P-Value	N	Het-P value
1	rs17035646	1	10736490	CASZ1	CASZ1	intron	A/G	0.34	AA,EA,HA	SBP	CURD	0.61(0.10)	-0.06(0.11)	1.41e-36	390473	0.399
1	rs17035646	1	10736490	CASZ1	CASZ1	intron	A/G	0.35	EA,HA	PP	CURD	0.38(0.07)	-0.12(0.08)	1.7e-20	365689	0.365
1	rs17035646	1	10736490	CASZ1	CASZ1	intron	A/G	0.34	AA,EA	SBP	LHD	0.56(0.08)	-0.18(0.14)	6.92e-14	162445	0.539
1	rs17035646	1	10736490	CASZ1	CASZ1	intron	A/G	0.34	AA,EA	DBP	LHD	0.30(0.05)	-0.03(0.09)	1.15e-11	162443	0.0614
1	rs17035646	1	10736490	CASZ1	CASZ1	intron	A/G	0.34	AA,EA	MAP	LHD	0.39(0.06)	-0.10(0.10)	4.9e-14	161676	0.0859
1	rs34071855	1	10738432	CASZ1	CASZ1	intron	C/G	0.65	AA,EA	DBP	CURD	-0.34(0.06)	0.04(0.07)	4.57e-29	373041	0.347
1	rs34071855	1	10738432	CASZ1	CASZ1	intron	C/G	0.65	AA,EA	MAP	CURD	-0.43(0.07)	0.18(0.08)	4.47e-20	373037	0.191
2	rs72640211	1	11778705	C1orf167	LOC100506310	reference	A/G	0.06	EA,HA	PP	CURD	-0.36(0.14)	-0.12(0.15)	1.26e-13	363281	0.631
2	rs12561919	1	11779866	C1orf167	LOC100506310	missense	T/C	0.13	ASA,EA	SBP	CURD	-0.51(0.10)	-0.25(0.12)	3.55e-44	509287	0.000433
2	rs4846044	1	11779941	C1orf167	LOC100506310	missense	T/C	0.04	EA,HA	DBP	CURD	-0.39(0.14)	-0.17(0.15)	7.41e-17	363313	0.478
2	rs55867221	1	11785165	C1orf167	LOC100506310	missense	T/C	0.89	AA,EA	DBP	LHD	0.39(0.07)	-0.03(0.13)	2.95e-09	162749	0.239
2	rs55867221	1	11785165	C1orf167	LOC100506310	missense	T/C	0.89	AA,EA	MAP	LHD	0.46(0.08)	-0.08(0.14)	1e-09	161982	0.145
3	rs13306556	1	11792053	MTHFR	MTHFR	intron	T/C	0.11	AA,EA	DBP	LHD	-0.39(0.07)	0.03(0.13)	2.51e-09	162749	0.257
3	rs6541006	1	11797469	MTHFR	MTHFR	intron	A/T	0.07	EA,HA	DBP	CURD	-0.32(0.11)	-0.17(0.13)	7.41e-17	366571	0.468
3	rs17037388	1	11797979	MTHFR	MTHFR	intron	A/G	0.84	AA,EA	MAP	LHD	0.55(0.07)	-0.02(0.12)	6.17e-21	163774	0.754
3	rs17037390	1	11800786	MTHFR	MTHFR	intron	A/G	0.14	ASA,EA	SBP	CURD	-0.49(0.09)	-0.24(0.11)	2.24e-40	507851	0.00118
3	rs17037390	1	11800786	MTHFR	MTHFR	intron	A/G	0.14	ASA,EA	PP	CURD	-0.19(0.07)	-0.11(0.08)	1.26e-14	502439	0.0615
4	rs13306561	1	11805747	CLCN6	CLCN6	upstream-2KB	A/G	0.86	ASA,EA	PP	CURD	0.19(0.07)	0.12(0.08)	5.62e-16	502439	0.0474
4	rs149764880	1	11820674	CLCN6	CLCN6	intron	T/G	0.12	ASA,EA	DBP	CURD	-0.40(0.07)	-0.09(0.08)	2.04e-38	490032	0.00766
4	rs149764880	1	11820674	CLCN6	CLCN6	intron	T/G	0.12	ASA,EA	MAP	CURD	-0.34(0.08)	0.07(0.09)	4.47e-12	490028	0.461
4	rs17037452	1	11835618	CLCN6	CLCN6	intron	A/G	0.86	ASA,EA	SBP	CURD	0.49(0.09)	0.26(0.11)	7.59e-43	507851	0.00061
4	rs17037452	1	11835618	CLCN6	CLCN6	intron	A/G	0.84	AA,EA	SBP	LHD	0.72(0.10)	0.06(0.17)	5.62e-20	164543	0.725
4	rs17037452	1	11835618	CLCN6	CLCN6	intron	A/G	0.84	AA,EA	MAP	LHD	0.55(0.07)	0.00(0.12)	1.26e-21	163774	0.931
5	rs198358	1	11844019	NPPA-AS1	NPPA-AS1	nc-transcript	T/C	0.79	ASA,EA	SBP	CURD	0.30(0.08)	0.11(0.10)	6.03e-18	516748	0.098
6	rs632793	1	11850620	NPPA	NPPA		A/G	0.67	ASA,EA	SBP	CURD	0.32(0.08)	-0.01(0.09)	2.88e-15	502172	0.253
7	rs198388	1	11857283	NPPB	NPPB	downstream-500B	T/C	0.44	AA,EA	SBP	LHD	-0.47(0.07)	0.10(0.13)	1.05e-12	171073	0.151
7	rs3753581	1	11860132	NPPB	NPPB	upstream-2KB	A/C	0.33	AA,ASA,EA	PP	CURD	-0.23(0.05)	-0.02(0.06)	2.4e-20	528363	0.276
7	rs3753581	1	11860132	NPPB	NPPB	upstream-2KB	A/C	0.38	AA,EA,HA	DBP	CURD	-0.27(0.05)	0.01(0.06)	2.04e-23	405995	0.231
7	rs3753581	1	11860132	NPPB	NPPB	upstream-2KB	A/C	0.38	AA,EA	DBP	LHD	-0.25(0.05)	0.04(0.08)	4.27e-09	171071	0.209
7	rs3753581	1	11860132	NPPB	NPPB	upstream-2KB	A/C	0.38	AA,EA	MAP	LHD	-0.33(0.05)	0.06(0.09)	2.63e-12	170304	0.314
7	rs12406089	1	11861124	NPPB	NPPB		C/G	0.71	ASA,EA	SBP	CURD	0.41(0.08)	0.10(0.09)	1.2e-32	506787	0.221
7	rs6676300	1	11865243	NPPB	NPPB		A/G	0.62	AA,EA,HA	MAP	CURD	0.28(0.06)	-0.13(0.07)	5.62e-10	414625	0.0261
8	rs113037176	1	11890813	LOC105376742	KIAA2013		A/G	0.05	EA,HA	SBP	CURD	-0.73(0.22)	-0.10(0.25)	2.34e-15	365572	0.202
8	rs71647013	1	11908142	LOC105376742	KIAA2013	nc-transcript	A/G	0.05	EA,HA	MAP	CURD	-0.50(0.16)	-0.08(0.19)	1.2e-09	203474	0.586
8	rs34550591	1	11913466	LOC105376742	KIAA2013	nc-transcript	A/C	0.95	EA,HA	DBP	CURD	0.46(0.13)	0.02(0.15)	2.29e-14	365568	0.719
9	rs71647019	1	11918198	KIAA2013	KIAA2013		A/C	0.05	EA,HA	SBP	CURD	-0.82(0.23)	-0.01(0.25)	1.07e-15	357995	0.199
9	rs71647020	1	11918477	KIAA2013	KIAA2013		A/G	0.05	EA,HA	DBP	CURD	-0.47(0.13)	-0.02(0.15)	6.03e-15	366369	0.414
10	rs12125361	1	112602157	ST7L	ST7L	intron	T/C	0.25	AA,EA,HA	SBP	CURD	-0.24(0.10)	-0.06(0.11)	2.4e-10	402836	0.00959
10	rs12118370	1	112605645	ST7L	ST7L	intron	A/G	0.78	AA,ASA,EA,HA	DBP	CURD	0.24(0.05)	-0.01(0.06)	1.29e-19	551801	0.32
10	rs12118370	1	112605645	ST7L	ST7L	intron	A/G	0.78	AA,ASA,EA,HA	MAP	CURD	0.26(0.05)	-0.12(0.06)	5.01e-10	551797	0.0916
11	rs2999159	1	112688136	MOV10	MOV10	intron	A/G	0.17	AA,EA,HA	SBP	CURD	-0.49(0.11)	0.11(0.13)	2.46e-14	402394	0.0692
11	rs2999159	1	112688136	MOV10	MOV10	intron	A/G	0.17	AA,EA,HA	DBP	CURD	-0.30(0.07)	0.00(0.08)	4.57e-20	402389	0.114
11	rs2999159	1	112688136	MOV10	MOV10	intron	A/G	0.17	AA,EA,HA	MAP	CURD	-0.36(0.08)	0.17(0.09)	1.15e-09	402385	0.0381
12	rs2279500	1	112701811	RHOC	RHOC	intron	T/C	0.17	AA,EA,HA	SBP	CURD	-0.47(0.12)	0.08(0.13)	5.13e-14	402394	0.0552
12	rs2279500	1	112701811	RHOC	RHOC	intron	T/C	0.17	AA,EA,HA	DBP	CURD	-0.28(0.07)	-0.01(0.08)	5.13e-19	402389	0.0682
12	rs2279500	1	112701811	RHOC	RHOC	intron	T/C	0.17	AA,EA,HA	MAP	CURD	-0.34(0.08)	0.15(0.09)	3.63e-09	402385	0.0194
13	rs16853865	1	204496531	PIK3C2B	PIK3C2B	upstream-2KB	A/G	0.33	AA,EA	DBP	CURD	-0.23(0.06)	0.09(0.06)	1.48e-08	387336	0.226
14	rs16853958	1	204559216	MDM4	MDM4	intron	A/C	0.32	AA,EA	DBP	CURD	-0.25(0.06)	0.13(0.06)	3.55e-09	387336	0.366
15	rs2493141	1	230729374	LOC105373166	AGT	intron	A/G	0.33	AA,EA	DBP	CURD	0.15(0.06)	0.05(0.07)	1.15e-11	382835	0.65
15	rs2493141	1	230729374	LOC105373166	AGT	intron	A/G	0.33	AA,EA	SBP	CURD	0.33(0.10)	-0.08(0.11)	2.04e-08	382834	0.581
16	rs12080886	1	243222734	CEP170	CEP170	intron	T/C	0.65	AA,EA	DBP	CURD	-0.25(0.06)	0.06(0.06)	8.51e-15	380089	0.103
17	rs1275984	2	26688641	KCNK3	KCNK3		A/C	0.42	AA,EA,HA	MAP	CURD	0.72(0.06)	0.01(0.07)	4.17e-300	405991	0.251
17	rs1275985	2	26688877	KCNK3	KCNK3		T/C	0.59	AA,EA,HA	DBP	CURD	-0.28(0.05)	-0.02(0.06)	2.95e-32	405995	0.00427
17	rs1275986	2	26689211	KCNK3	KCNK3		A/C	0.59	AA,EA	DBP	LHD	-0.26(0.04)	0.02(0.08)	4.57e-11	176590	0.336
17	rs12476527	2	26692756	KCNK3	KCNK3	utr-5	T/G	0.61	EA,HA	SBP	CURD	-0.92(0.10)	-0.18(0.11)	0	350008	0.546
17	rs1731249	2	26697157	KCNK3	KCNK3	intron	A/T	0.59	AA,EA	SBP	LHD	-0.48(0.07)	0.07(0.13)	1.02e-13	170940	0.512
17	rs1275978	2	26700227	KCNK3	KCNK3	intron	T/C	0.59	AA,EA	MAP	LHD	-0.36(0.05)	0.11(0.09)	5.89e-14	170171	0.265
17	rs2586886	2	26709163	KCNK3	KCNK3	intron	T/C	0.61	AA,EA	PP	CURD	-0.23(0.07)	0.00(0.08)	2.51e-14	368395	0.00112
18	rs7599598	2	96686103	FER1L5	FER1L5	missense	A/G	0.58	ASA,EA	DBP	CURD	-0.08(0.04)	-0.10(0.05)	1.35e-11	502359	0.318
19	rs1446468	2	164106976	FIGN	FIGN		T/C	0.46	ASA,EA	DBP	CURD	-0.20(0.04)	-0.03(0.05)	2.82e-23	508607	0.532
19	rs1446468	2	164106976	FIGN	FIGN		T/C	0.46	ASA,EA	SBP	CURD	-0.41(0.07)	-0.04(0.08)	1.45e-34	508605	0.799
19	rs1446468	2	164106976	FIGN	FIGN		T/C	0.46	ASA,EA	MAP	CURD	-0.24(0.04)	0.05(0.05)	4.47e-16	508603	0.0502
20	rs73029563	2	164151656	GRB14	GRB14		C/G	0.45	ASA,EA	SBP	CURD	-0.44(0.07)	-0.03(0.08)	2.46e-37	508605	0.417
20	rs10184428	2	164155317	GRB14	GRB14		A/C	0.55	ASA,EA	DBP	CURD	0.24(0.04)	0.01(0.05)	2.14e-26	511078	0.278
20	rs10184428	2	164155317	GRB14	GRB14		A/C	0.55	ASA,EA	MAP	CURD	0.28(0.05)	-0.08(0.05)	6.76e-19	511074	0.00249
20	rs1371187	2	164188591	GRB14	GRB14		A/G	0.58	ASA,EA	PP	CURD	0.22(0.04)	0.01(0.05)	1.59e-20	505665	0.302
20	rs438885	2	164195781	GRB14	GRB14		A/T	0.42	ASA,EA	SBP	LHD	-0.39(0.07)	-0.04(0.11)	1.95e-13	216165	0.642
20	rs438885	2	164195781	GRB14	GRB14		A/T	0.42	ASA,EA	DBP	LHD	-0.21(0.04)	-0.02(0.07)	1.51e-09	216163	0.649
20	rs438885	2	164195781	GRB14	GRB14		A/T	0.42	ASA,EA	MAP	LHD	-0.26(0.05)	-0.02(0.08)	5.75e-12	215396	0.612
21	rs13405173	2	182449087	PDE1A	PDE1A	intron	A/C	0.59	EA,HA	DBP	CURD	-0.27(0.06)	0.15(0.07)	6.46e-09	361850	0.0805
21	rs13405173	2	182449087	PDE1A	PDE1A	intron	A/C	0.59	EA,HA	MAP	CURD	-0.38(0.07)	0.35(0.07)	3.16e-08	361846	0.371
22	rs640065	3	27322446	NEK10	NEK10	intron	A/T	0.27	AA,ASA,EA	DBP	CURD	0.20(0.05)	-0.01(0.05)	5.25e-14	532333	0.292
22	rs640065	3	27322446	NEK10	NEK10	intron	A/T	0.25	ASA,EA,HA	SBP	CURD	0.56(0.07)	-0.26(0.09)	9.55e-22	526171	0.368
22	rs640065	3	27322446	NEK10	NEK10	intron	A/T	0.26	ASA,EA,HA	MAP	CURD	0.30(0.05)	-0.18(0.06)	1.29e-11	526163	0.2
22	rs640065	3	27322446	NEK10	NEK10	intron	A/T	0.25	ASA,EA,HA	PP	CURD	0.33(0.05)	-0.20(0.06)	8.13e-13	520755	0.215
23	rs60605842	3	27439550	SLC4A7	SLC4A7	intron	A/G	0.55	ASA,EA	SBP	LHD	0.31(0.07)	0.01(0.11)	4.07e-08	215139	0.228
23	rs34423734	3	27478270	SLC4A7	SLC4A7	intron	A/C	0.18	ASA,EA	MAP	CURD	0.28(0.07)	-0.05(0.08)	1.12e-10	380227	0.581
23	rs450189	3	27481209	SLC4A7	SLC4A7	intron	T/C	0.56	AA,ASA,EA	SBP	CURD	0.46(0.07)	-0.14(0.08)	6.17e-23	535279	0.673
23	rs450189	3	27481209	SLC4A7	SLC4A7	intron	T/C	0.54	ASA,EA	PP	CURD	0.33(0.05)	-0.13(0.06)	3.09e-20	500673	0.974
23	rs2003886	3	27486241	SLC4A7	SLC4A7	upstream-2KB	T/G	0.2	ASA,EA	DBP	CURD	0.24(0.06)	-0.04(0.06)	7.94e-13	508751	0.417
24	rs648103	3	27508810	LOC105377005	SLC4A7		T/C	0.29	ASA,EA	PP	CURD	0.33(0.05)	-0.16(0.06)	3.63e-15	503908	0.743
24	rs2643826	3	27521497	LOC105377005	SLC4A7	intron	T/C	0.42	ASA,EA	DBP	CURD	0.18(0.04)	0.01(0.05)	2.34e-16	509848	0.261
24	rs2643826	3	27521497	LOC105377005	SLC4A7	intron	T/C	0.42	ASA,EA	SBP	CURD	0.55(0.07)	-0.16(0.08)	6.46e-32	509848	0.738
24	rs2643826	3	27521497	LOC105377005	SLC4A7	intron	T/C	0.43	ASA,EA	MAP	CURD	0.29(0.05)	-0.12(0.06)	2.51e-15	509844	0.593
25	rs28581706	3	41829905	ULK4	ULK4	intron	A/C	0.85	AA,EA	PP	CURD	0.44(0.10)	0.11(0.11)	8.91e-38	341288	0.85
25	rs1716983	3	41922636	ULK4	ULK4	intron	A/G	0.8	AA,EA	DBP	CURD	-0.32(0.07)	-0.05(0.08)	6.03e-26	374261	0.141
25	rs7622665	3	41929251	ULK4	ULK4	intron	T/C	0.2	AA,EA	DBP	LHD	0.34(0.06)	0.15(0.10)	3.89e-18	157901	0.372
25	rs794899	3	41987230	ULK4	LOC100287063		T/C	0.18	AA,EA	PP	LHD	-0.44(0.06)	0.15(0.11)	2.24e-13	156081	0.416
26	rs794905	3	41993238	TRAK1	LOC100287063		T/C	0.82	AA,EA	PP	CURD	0.32(0.08)	0.17(0.09)	5.01e-33	361604	0.55
27	rs16853173	3	169115047	MECOM	MECOM	intron	T/C	0.08	AA,EA	SBP	CURD	-0.59(0.17)	0.01(0.19)	1.02e-13	377098	0.209
27	rs1290784	3	169379112	MECOM	MECOM	intron	T/C	0.38	ASA,EA	DBP	LHD	0.26(0.04)	-0.06(0.07)	2.24e-11	215765	0.293
27	rs1290786	3	169379593	MECOM	MECOM	intron	T/C	0.36	ASA,EA	MAP	LHD	0.31(0.05)	-0.09(0.08)	3.72e-12	210053	0.458
27	rs988398	3	169381073	MECOM	MECOM	intron	T/C	0.36	ASA,EA	DBP	CURD	0.14(0.05)	0.14(0.05)	9.12e-27	509969	0.256
27	rs988398	3	169381073	MECOM	MECOM	intron	T/C	0.36	ASA,EA	MAP	CURD	0.13(0.05)	0.07(0.06)	7.94e-12	509965	0.916
27	rs2014590	3	169428709	MECOM	MECOM	intron	T/C	0.56	ASA,EA	SBP	LHD	-0.37(0.07)	0.09(0.11)	4.9e-10	215767	0.341
28	rs35239788	3	169460088	LOC105374205	MECOM	intron	T/C	0.36	ASA,EA	MAP	LHD	0.31(0.05)	-0.10(0.08)	6.61e-12	214359	0.355
28	rs3817581	3	169463794	LOC105374205	MECOM	intron	T/C	0.43	ASA,EA	SBP	LHD	0.35(0.07)	-0.06(0.11)	4.27e-09	211103	0.12
28	rs1343040	3	169468505	LOC105374205	MECOM	intron	A/G	0.35	ASA,EA	DBP	LHD	0.26(0.04)	-0.07(0.07)	9.77e-11	220645	0.47
29	rs871606	4	53933078	LOC105377655	RPL21P44		T/C	0.87	AA,ASA,EA	PP	CURD	0.59(0.06)	-0.13(0.07)	5.25e-46	537481	0.0064
29	rs871606	4	53933078	LOC105377655	RPL21P44		T/C	0.89	AA,EA	PP	LHD	0.46(0.08)	-0.05(0.13)	6.46e-12	167899	0.0585
29	rs17083718	4	53935382	LOC105377655	RPL21P44		A/G	0.9	AA,EA	SBP	CURD	0.83(0.15)	-0.57(0.17)	4.47e-10	384240	0.615
30	rs13149993	4	80237391	LOC105377304	FGF5	intron	A/G	0.33	ASA,EA	PP	CURD	0.25(0.05)	0.04(0.05)	8.32e-163	503129	0.931
30	rs13125101	4	80253438	LOC105377304	FGF5	intron	A/G	0.31	ASA,EA	DBP	CURD	0.40(0.04)	0.01(0.05)	2.09e-63	511313	0.00555
30	rs13125101	4	80253438	LOC105377304	FGF5	intron	A/G	0.31	ASA,EA	SBP	CURD	0.66(0.07)	0.04(0.08)	2.69e-71	511313	0.0332
30	rs13125101	4	80253438	LOC105377304	FGF5	intron	A/G	0.31	ASA,EA	MAP	CURD	0.44(0.05)	-0.18(0.06)	1.15e-33	511309	1.34e-06
31	rs12509595	4	80261400	FGF5	FGF5		T/C	0.7	ASA,EA	DBP	CURD	-0.41(0.04)	-0.01(0.05)	3.39e-65	509422	0.00162
31	rs12509595	4	80261400	FGF5	FGF5		T/C	0.7	ASA,EA	SBP	CURD	-0.69(0.07)	-0.03(0.09)	2.4e-73	509422	0.0149
31	rs12509595	4	80261400	FGF5	FGF5		T/C	0.7	ASA,EA	PP	CURD	-0.27(0.05)	-0.02(0.06)	8.51e-28	504010	0.262
31	rs16998073	4	80263187	FGF5	FGF5		A/T	0.71	AA,EA	DBP	LHD	-0.31(0.05)	-0.04(0.09)	1.7e-14	174772	0.0828
31	rs16998073	4	80263187	FGF5	FGF5		A/T	0.71	AA,EA	SBP	LHD	-0.53(0.08)	0.13(0.14)	5.25e-13	174719	0.292
31	rs16998073	4	80263187	FGF5	FGF5		A/T	0.71	AA,EA	MAP	LHD	-0.37(0.06)	-0.01(0.10)	2.82e-15	173948	0.0973
31	rs36034102	4	80280894	FGF5	FGF5	intron	T/G	0.25	ASA,EA	MAP	CURD	0.39(0.05)	-0.19(0.06)	7.59e-19	502931	2.25e-05
32	rs35225200	4	102225731	SLC39A8	SLC39A8		A/C	0.93	AA,EA	MAP	CURD	0.48(0.12)	-0.08(0.14)	1.48e-12	369655	0.00047
32	rs13107325	4	102267552	SLC39A8	SLC39A8	missense	T/C	0.07	AA,EA	DBP	CURD	-0.50(0.11)	-0.02(0.12)	1.7e-23	369814	0.0223
32	rs13107325	4	102267552	SLC39A8	SLC39A8	missense	T/C	0.07	AA,EA	SBP	CURD	-0.82(0.19)	0.17(0.21)	1.12e-15	369754	0.00572
33	rs11725969	4	155705436	GUCY1A3	GUCY1A3	intron	T/C	0.25	AA,ASA,EA,HA	DBP	CURD	-0.21(0.04)	-0.04(0.05)	2.24e-22	553735	0.0113
33	rs11725969	4	155705436	GUCY1A3	GUCY1A3	intron	T/C	0.25	ASA,EA,HA	SBP	CURD	-0.32(0.07)	-0.07(0.09)	5.75e-19	527281	0.153
33	rs11725969	4	155705436	GUCY1A3	GUCY1A3	intron	T/C	0.25	ASA,EA,HA	MAP	CURD	-0.24(0.05)	0.07(0.06)	6.92e-12	527271	0.0238
33	rs11725969	4	155705436	GUCY1A3	GUCY1A3	intron	T/C	0.25	AA,EA	DBP	LHD	-0.18(0.05)	-0.16(0.09)	2.24e-08	170203	0.163
33	rs11725969	4	155705436	GUCY1A3	GUCY1A3	intron	T/C	0.25	AA,EA	MAP	LHD	-0.20(0.06)	-0.20(0.10)	1.26e-08	169436	0.101
34	rs11731886	4	155738667	LOC105377506	GUCY1A3	intron	A/C	0.76	ASA,EA	SBP	CURD	0.26(0.08)	0.11(0.09)	1.15e-15	509266	0.286
35	rs3828591	5	32713002	NPR3	NPR3	intron	C/G	0.4	AA,EA	PP	CURD	-0.11(0.06)	-0.22(0.07)	1.26e-25	380384	0.202
35	rs3828591	5	32713002	NPR3	NPR3	intron	C/G	0.4	AA,EA	SBP	LHD	-0.62(0.07)	0.38(0.13)	2.95e-17	169659	0.222
35	rs3828591	5	32713002	NPR3	NPR3	intron	C/G	0.4	AA,EA	PP	LHD	-0.35(0.05)	0.23(0.09)	8.51e-13	169657	0.00556
35	rs9292468	5	32818967	NPR3	NPR3		T/C	0.4	ASA,EA,HA	DBP	CURD	-0.22(0.04)	-0.07(0.05)	4.07e-35	530396	0.223
35	rs9292468	5	32818967	NPR3	NPR3		T/C	0.4	ASA,EA,HA	MAP	CURD	-0.28(0.04)	0.03(0.05)	1.86e-27	530392	0.358
35	rs9292468	5	32818967	NPR3	NPR3		T/C	0.4	EA,HA	SBP	CURD	-0.45(0.09)	-0.16(0.10)	3.63e-46	379539	0.0494
35	rs10059884	5	32832368	NPR3	NPR3		A/C	0.59	ASA,EA	DBP	LHD	0.29(0.04)	-0.10(0.07)	2.51e-13	215872	0.637
35	rs10059884	5	32832368	NPR3	NPR3		A/C	0.59	ASA,EA	MAP	LHD	0.35(0.05)	-0.09(0.08)	7.41e-17	215105	0.868
36	rs4475251	5	115039988	TRIM36	TRIM36		T/G	0.48	ASA,EA	DBP	CURD	-0.22(0.04)	0.06(0.05)	1.62e-14	484641	0.213
36	rs4475251	5	115039988	TRIM36	TRIM36		T/G	0.48	ASA,EA	MAP	CURD	-0.25(0.04)	0.12(0.05)	8.13e-12	484576	0.155
37	rs1952652	5	158384080	LOC101927697	EBF1	intron	A/T	0.65	AA,EA	SBP	LHD	0.49(0.07)	-0.28(0.13)	2.69e-11	170780	0.198
37	rs1952652	5	158384080	LOC101927697	EBF1	intron	A/T	0.65	AA,EA	MAP	LHD	0.31(0.05)	-0.13(0.09)	4.27e-10	170011	0.174
37	rs11960210	5	158390626	LOC101927697	EBF1	intron	T/C	0.66	AA,ASA,EA,HA	SBP	CURD	0.45(0.07)	-0.08(0.08)	4.57e-28	556863	0.129
37	rs11960210	5	158390626	LOC101927697	EBF1	intron	T/C	0.67	ASA,EA	PP	CURD	0.20(0.05)	-0.04(0.06)	5.01e-11	507557	0.221
37	rs10051330	5	158392616	LOC101927697	EBF1	intron	A/G	0.66	AA,EA,HA	DBP	CURD	0.28(0.05)	-0.05(0.06)	3.72e-23	405577	0.313
37	rs13180995	5	158425798	LOC101927697	EBF1		A/G	0.55	AA,EA,HA	MAP	CURD	0.27(0.06)	-0.09(0.06)	3.55e-21	405991	0.0879
38	rs7446877	5	158441123	LOC105377681	EBF1		T/C	0.35	AA,EA,HA	SBP	CURD	-0.49(0.09)	0.07(0.10)	4.47e-26	406000	0.351
38	rs7446877	5	158441123	LOC105377681	EBF1		T/C	0.35	AA,EA	DBP	CURD	-0.28(0.06)	0.05(0.06)	1.29e-21	388568	0.314
38	rs4371736	5	158450445	LOC105377681	EBF1		C/G	0.42	AA,EA,HA	MAP	CURD	-0.30(0.06)	0.06(0.07)	1.51e-54	405991	0.326
39	rs6901866	6	43292922	SLC22A7	TTBK1		T/C	0.69	ASA,EA	PP	CURD	-0.23(0.05)	0.02(0.06)	9.55e-16	505666	0.186
39	rs16896398	6	43294966	SLC22A7	TTBK1	upstream-2KB	A/T	0.69	ASA,EA	SBP	CURD	-0.42(0.07)	0.09(0.08)	3.02e-20	512969	0.0115
40	rs2270860	6	43302413	CRIP3	CRIP3	intron	T/C	0.32	ASA,EA	SBP	CURD	0.43(0.07)	-0.10(0.08)	2.75e-20	497960	0.0118
40	rs2270860	6	43302413	CRIP3	CRIP3	intron	T/C	0.32	ASA,EA	PP	CURD	0.25(0.05)	-0.04(0.06)	4.57e-16	492548	0.255
41	rs1563788	6	43340625	ZNF318	ZNF318	intron	T/C	0.31	ASA,EA	SBP	CURD	0.41(0.07)	-0.06(0.08)	2.82e-21	504591	0.0153
41	rs1563788	6	43340625	ZNF318	ZNF318	intron	T/C	0.31	ASA,EA	PP	CURD	0.23(0.05)	-0.01(0.06)	4.27e-16	499179	0.276
42	rs7763558	6	43381477	LOC105375065	ZNF318		A/G	0.33	ASA,EA	PP	CURD	0.22(0.05)	-0.01(0.06)	1.91e-16	505666	0.307
42	rs1214759	6	43385242	LOC105375065	ZNF318		A/G	0.33	ASA,EA	SBP	CURD	0.43(0.07)	-0.10(0.08)	2.46e-22	521608	0.0292
43	rs12194642	6	78829074	IRAK1BP1	IRAK1BP1		A/G	0.38	EA,HA	DBP	CURD	0.08(0.06)	0.16(0.06)	2.09e-16	378305	0.392
44	rs9388519	6	126786083	LOC105377992	MIR588		T/C	0.58	AA,EA,HA	DBP	CURD	-0.30(0.05)	0.02(0.06)	1.59e-29	388446	0.374
44	rs2179723	6	126786511	LOC105377992	MIR588		A/G	0.57	EA,HA	MAP	CURD	-0.30(0.06)	0.07(0.07)	1.12e-16	366455	0.177
44	rs2021708	6	126787775	LOC105377992	MIR588		A/G	0.55	ASA,EA,HA	SBP	CURD	-0.36(0.06)	-0.09(0.08)	1.51e-34	514853	0.557
45	rs13209747	6	126794309	LOC105377991	MIR588		T/C	0.43	AA,ASA,EA,HA	DBP	CURD	0.27(0.04)	0.01(0.05)	1.1e-36	539793	0.789
45	rs9388520	6	126795330	LOC105377991	MIR588		A/G	0.43	AA,ASA,EA,HA	MAP	CURD	0.29(0.04)	-0.06(0.05)	8.91e-25	539789	0.751
45	rs11756347	6	126856325	LOC105377991	RSPO3		A/G	0.57	EA,HA	SBP	CURD	-0.41(0.09)	-0.16(0.10)	9.33e-63	379539	0.623
46	rs9388537	6	126877485	LOC105377990	RSPO3	downstream-500B	A/G	0.58	AA,EA,HA	DBP	CURD	-0.29(0.05)	0.00(0.06)	5.13e-31	405995	0.455
46	rs11154376	6	126879498	LOC105377990	RSPO3	intron	A/G	0.58	AA,EA,HA	MAP	CURD	-0.31(0.06)	0.08(0.07)	3.02e-18	405991	0.222
46	rs7758037	6	126884350	LOC105377990	RSPO3	intron	C/G	0.44	EA,HA	SBP	CURD	0.37(0.09)	0.14(0.10)	3.98e-37	379539	0.604
47	rs62434109	6	150654176	PLEKHG1	PLEKHG1	intron	T/G	0.94	ASA,EA	SBP	LHD	0.63(0.15)	0.36(0.24)	9.77e-11	202800	0.0824
47	rs62434109	6	150654176	PLEKHG1	PLEKHG1	intron	T/G	0.94	ASA,EA	DBP	LHD	0.45(0.09)	0.22(0.16)	4.27e-12	202798	0.141
47	rs62434111	6	150656822	PLEKHG1	PLEKHG1	intron	A/C	0.06	ASA,EA	MAP	LHD	-0.53(0.10)	-0.23(0.17)	9.33e-14	197352	0.137
47	rs62434129	6	150687701	PLEKHG1	PLEKHG1	intron	A/T	0.94	AA,ASA,EA	SBP	CURD	0.76(0.13)	-0.07(0.16)	5.25e-22	527598	0.114
47	rs62434129	6	150687701	PLEKHG1	PLEKHG1	intron	A/T	0.94	AA,ASA,EA	DBP	CURD	0.53(0.08)	-0.05(0.10)	4.17e-28	527597	0.696
47	rs62434129	6	150687701	PLEKHG1	PLEKHG1	intron	A/T	0.94	AA,ASA,EA	MAP	CURD	0.49(0.09)	-0.10(0.11)	2.46e-16	527593	0.0382
48	rs7744143	6	165766475	LOC105378114	PDE10A		A/G	0.93	AA,EA	DBP	CURD	0.30(0.11)	0.07(0.12)	5.89e-11	354608	0.587
49	rs5883070	7	27240226	EVX1	EVX1		D/I	0.06	ASA,EA	DBP	LHD	-0.34(0.12)	-0.55(0.21)	4.47e-08	98652	0.0144
49	rs5883070	7	27240226	EVX1	EVX1		D/I	0.06	ASA,EA	MAP	LHD	-0.44(0.14)	-0.60(0.24)	2.24e-09	98652	0.0128
49	rs5883070	7	27240226	EVX1	EVX1		D/I	0.06	ASA,EA	SBP	LHD	-0.65(0.19)	-0.75(0.33)	3.24e-09	98652	0.0507
50	rs10255839	7	27249498	EVX1-AS	EVX1		A/G	0.86	AA,ASA,EA	DBP	CURD	0.20(0.05)	0.20(0.07)	4.17e-19	513545	0.0643
50	rs10255839	7	27249498	EVX1-AS	EVX1		A/G	0.86	AA,ASA,EA	SBP	CURD	0.33(0.08)	0.37(0.11)	9.33e-23	513544	0.000399
50	rs10255839	7	27249498	EVX1-AS	EVX1		A/G	0.86	AA,ASA,EA	MAP	CURD	0.23(0.06)	0.18(0.08)	4.27e-17	513541	0.0546
50	rs10255839	7	27249498	EVX1-AS	EVX1		A/G	0.87	AA,ASA,EA	SBP	LHD	0.75(0.11)	-0.28(0.17)	7.59e-13	206246	0.000104
50	rs10255839	7	27249498	EVX1-AS	EVX1		A/G	0.87	AA,ASA,EA	DBP	LHD	0.42(0.07)	-0.07(0.11)	3.89e-11	206244	0.0102
50	rs10255839	7	27249498	EVX1-AS	EVX1		A/G	0.87	AA,ASA,EA	MAP	LHD	0.53(0.08)	-0.15(0.12)	1.18e-13	205477	0.000335
51	rs62481856	7	106771636	PIK3CG	CCDC71L		A/G	0.2	AA,EA	PP	LHD	0.55(0.06)	-0.11(0.09)	4.27e-33	169663	0.117
51	rs2392929	7	106773623	PIK3CG	CCDC71L		T/G	0.81	AA,EA	SBP	CURD	-0.44(0.12)	-0.25(0.13)	6.46e-35	382544	0.424
51	rs2392929	7	106773623	PIK3CG	CCDC71L		T/G	0.81	AA,EA	PP	CURD	-0.46(0.08)	-0.19(0.09)	9.55e-100	380896	0.417
51	rs2392929	7	106773623	PIK3CG	CCDC71L		T/G	0.8	AA,EA	SBP	LHD	-0.60(0.09)	0.02(0.16)	1.35e-14	168896	0.233
52	rs67665719	8	119383756	NOV	NOV		A/G	0.75	ASA,EA	SBP	CURD	-0.02(0.08)	-0.28(0.09)	8.71e-10	500199	0.404
52	rs34112166	8	119388292	NOV	NOV		A/G	0.21	AA,EA	PP	LHD	0.39(0.06)	-0.00(0.10)	4.07e-17	170203	0.0528
53	rs60721377	10	18122720	CACNB2	CACNB2		C/G	0.96	AA,EA	DBP	CURD	-0.22(0.13)	-0.21(0.15)	7.24e-09	369160	0.491
53	rs113862204	10	18396076	CACNB2	CACNB2	intron	T/C	0.31	EA,HA	SBP	CURD	-0.56(0.10)	0.02(0.11)	1.74e-41	378309	0.14
53	rs6482384	10	18397338	CACNB2	CACNB2	intron	T/G	0.31	EA,HA	PP	CURD	-0.32(0.07)	0.07(0.07)	1.62e-25	372893	0.654
54	rs2505084	10	30046591	KIAA1462	KIAA1462	intron	A/G	0.48	EA,HA	PP	CURD	0.41(0.06)	-0.31(0.07)	1.18e-12	382817	0.000971
55	rs7922049	10	61702607	C10orf107	C10orf107	intron	A/G	0.14	AA,EA	DBP	LHD	-0.39(0.06)	0.13(0.11)	1.55e-10	163421	0.286
55	rs7922049	10	61702607	C10orf107	C10orf107	intron	A/G	0.14	AA,EA	MAP	LHD	-0.43(0.07)	0.18(0.13)	9.33e-10	162654	0.371
55	rs72823804	10	61716343	C10orf107	C10orf107	intron	A/G	0.86	AA,EA	MAP	CURD	0.42(0.09)	-0.15(0.10)	1.23e-13	386747	0.262
55	rs76781995	10	61724451	C10orf107	C10orf107	intron	T/C	0.91	EA,HA	SBP	CURD	0.85(0.17)	-0.29(0.19)	3.72e-16	371377	0.263
56	rs1848797	10	62793174	ADO	ADO		A/G	0.63	AA,EA	DBP	CURD	0.20(0.06)	-0.01(0.06)	2.4e-13	385854	0.693
57	rs7909591	10	102899261	AS3MT	AS3MT	intron	T/G	0.31	ASA,EA	SBP	CURD	-0.25(0.07)	-0.04(0.08)	6.46e-13	511078	0.381
57	rs7909591	10	102899261	AS3MT	AS3MT	intron	T/G	0.31	ASA,EA	PP	CURD	-0.26(0.05)	-0.03(0.06)	1.12e-29	505666	0.637
57	rs7909591	10	102899261	AS3MT	AS3MT	intron	T/G	0.31	ASA,EA	PP	LHD	-0.27(0.05)	0.04(0.08)	7.94e-11	215872	0.43
58	rs562434	11	1871700	LSP1	LSP1	intron	A/G	0.42	AA,ASA,EA,HA	PP	CURD	0.30(0.05)	0.04(0.06)	3.02e-35	529560	0.0218
58	rs562434	11	1871700	LSP1	LSP1	intron	A/G	0.44	ASA,EA,HA	SBP	CURD	0.54(0.07)	0.06(0.08)	8.71e-50	505531	0.331
58	rs112640876	11	1873813	LSP1	LSP1	intron	A/G	0.65	ASA,EA,HA	MAP	CURD	0.34(0.05)	-0.09(0.06)	3.8e-21	491324	0.0176
58	rs112640876	11	1873813	LSP1	LSP1	intron	A/G	0.64	ASA,EA	DBP	CURD	0.34(0.05)	-0.08(0.06)	9.77e-27	473901	0.421
58	rs3781962	11	1886379	LSP1	LSP1	intron	C/G	0.59	ASA,EA	PP	LHD	-0.23(0.05)	-0.13(0.08)	3.24e-12	202627	0.401
58	rs576603	11	1892909	LSP1	LSP1		T/C	0.47	ASA,EA	SBP	LHD	0.47(0.08)	0.18(0.12)	1.41e-18	202629	0.302
59	rs7483477	11	1899025	LINC01150	LSP1	intron	T/G	0.75	ASA,EA	DBP	CURD	-0.13(0.05)	-0.05(0.06)	1.38e-09	487859	0.0361
59	rs7483477	11	1899025	LINC01150	LSP1	intron	T/G	0.75	ASA,EA	MAP	CURD	-0.18(0.05)	-0.03(0.07)	1.15e-10	487855	0.119
59	rs7483477	11	1899025	LINC01150	LSP1	intron	T/G	0.75	AA,EA	PP	CURD	-0.27(0.08)	-0.02(0.09)	1.78e-15	364769	0.131
60	rs735955	11	1921890	TNNT3	TNNT3	intron	A/G	0.42	ASA,EA,HA	PP	CURD	0.31(0.05)	-0.01(0.05)	7.41e-31	506461	0.927
60	rs3781956	11	1924654	TNNT3	TNNT3	intron	A/G	0.44	ASA,EA,HA	SBP	CURD	0.46(0.07)	0.10(0.08)	3.39e-43	508362	0.973
61	rs217719	11	1973993	MRPL23	MRPL23-AS1	intron	A/G	0.23	EA,HA	SBP	CURD	0.37(0.11)	0.10(0.12)	2.75e-18	376654	0.337
61	rs10840138	11	1980665	MRPL23	MRPL23-AS1	intron	T/C	0.77	EA,HA	MAP	CURD	-0.19(0.07)	-0.05(0.08)	4.07e-10	376646	0.229
62	rs10766309	11	16235171	SOX6	SOX6	intron	A/G	0.21	ASA,EA	MAP	CURD	0.31(0.05)	-0.09(0.06)	2.69e-16	508345	0.652
62	rs7118275	11	16250132	SOX6	SOX6	intron	T/C	0.79	ASA,EA	DBP	CURD	-0.29(0.05)	0.03(0.06)	6.03e-23	508349	0.461
62	rs11023906	11	16302860	SOX6	SOX6	intron	A/G	0.21	ASA,EA	SBP	LHD	0.45(0.08)	-0.12(0.13)	1.26e-09	215487	0.95
62	rs2218001	11	16320669	SOX6	SOX6	intron	A/C	0.79	ASA,EA	SBP	CURD	-0.44(0.08)	-0.04(0.09)	1.18e-27	508347	0.33
63	rs416258	11	16890089	PLEKHA7	PLEKHA7	intron	C/G	0.3	AA,EA	DBP	CURD	0.20(0.06)	-0.04(0.06)	5.62e-10	388568	0.542
63	rs416258	11	16890089	PLEKHA7	PLEKHA7	intron	C/G	0.3	AA,EA	SBP	CURD	0.29(0.10)	0.04(0.11)	5.01e-13	388567	0.788
63	rs7940807	11	16892459	PLEKHA7	PLEKHA7	intron	T/G	0.25	AA,EA	MAP	CURD	0.27(0.08)	0.03(0.09)	2e-10	215353	0.298
64	rs7125196	11	61505093	LOC105369329	MIR4488	intron	T/C	0.77	ASA,EA	DBP	CURD	0.25(0.05)	0.08(0.06)	4.9e-25	508958	0.423
64	rs7125196	11	61505093	LOC105369329	MIR4488	intron	T/C	0.77	ASA,EA	SBP	CURD	0.38(0.08)	0.05(0.10)	2.82e-17	508958	0.599
64	rs7125196	11	61505093	LOC105369329	MIR4488	intron	T/C	0.77	ASA,EA	MAP	CURD	0.28(0.05)	-0.07(0.07)	1.74e-12	508954	0.436
65	rs10897164	11	61510303	LRRC10B	LRRC10B	utr-3	A/G	0.78	AA,ASA,EA	DBP	CURD	0.26(0.05)	0.08(0.06)	1.66e-25	534388	0.212
65	rs10897164	11	61510303	LRRC10B	LRRC10B	utr-3	A/G	0.78	AA,ASA,EA	MAP	CURD	0.28(0.05)	-0.05(0.07)	1.48e-13	534384	0.0845
65	rs10897164	11	61510303	LRRC10B	LRRC10B	utr-3	A/G	0.78	ASA,EA	SBP	CURD	0.36(0.08)	0.07(0.10)	2.51e-16	508958	0.739
66	rs751985	11	61511118	LOC105369330	LRRC10B	nc-transcript	T/C	0.21	AA,ASA,EA	DBP	CURD	-0.26(0.05)	-0.09(0.06)	1.66e-25	531849	0.238
66	rs751985	11	61511118	LOC105369330	LRRC10B	nc-transcript	T/C	0.22	ASA,EA	SBP	CURD	-0.36(0.08)	-0.08(0.10)	2.63e-16	506419	0.829
66	rs11230729	11	61511446	LOC105369330	LRRC10B	intron	T/C	0.22	AA,ASA,EA	MAP	CURD	-0.28(0.05)	0.04(0.07)	1.78e-13	531845	0.0621
67	rs2306363	11	65638129	SIPA1	PCNXL3	upstream-2KB	T/G	0.21	AA,ASA,EA,HA	SBP	CURD	-0.46(0.07)	0.09(0.09)	9.77e-21	551548	0.106
67	rs2306363	11	65638129	SIPA1	PCNXL3	upstream-2KB	T/G	0.19	AA,EA	DBP	CURD	-0.34(0.07)	0.10(0.08)	1.86e-16	385144	0.269
67	rs2306363	11	65638129	SIPA1	PCNXL3	upstream-2KB	T/G	0.19	AA,EA	MAP	CURD	-0.36(0.08)	0.19(0.09)	8.32e-09	385140	0.0545
67	rs2306363	11	65638129	SIPA1	PCNXL3	upstream-2KB	T/G	0.19	AA,EA	SBP	LHD	-0.55(0.09)	0.17(0.16)	2.14e-10	169033	0.0292
67	rs2306363	11	65638129	SIPA1	PCNXL3	upstream-2KB	T/G	0.19	AA,EA	DBP	LHD	-0.34(0.06)	0.07(0.10)	1.23e-10	169031	0.117
67	rs2306363	11	65638129	SIPA1	PCNXL3	upstream-2KB	T/G	0.19	AA,EA	MAP	LHD	-0.40(0.06)	0.11(0.11)	2.51e-11	168264	0.0465
68	rs10750766	11	65706327	KAT5	KAT5		A/C	0.7	EA,HA	SBP	CURD	0.39(0.10)	-0.06(0.11)	1.23e-12	349253	0.29
68	rs10750766	11	65706327	KAT5	KAT5		A/C	0.7	EA,HA	DBP	CURD	0.18(0.06)	0.01(0.07)	6.31e-11	349249	0.187
69	rs2055449	11	100679599	LOC100128386	ARHGAP42		A/T	0.29	EA,HA	DBP	CURD	-0.34(0.06)	0.04(0.07)	5.75e-29	379535	0.0149
70	rs670401	11	100701679	ARHGAP42	ARHGAP42	intron	A/G	0.29	EA,HA	MAP	CURD	-0.40(0.07)	0.21(0.07)	8.71e-15	378301	0.0615
70	rs633185	11	100722807	ARHGAP42	ARHGAP42	intron	C/G	0.71	EA,HA	SBP	CURD	0.54(0.10)	-0.04(0.11)	2.24e-29	379539	0.104
70	rs604723	11	100739815	ARHGAP42	ARHGAP42	intron	T/C	0.28	EA,HA	DBP	CURD	-0.35(0.06)	0.04(0.07)	2.63e-31	388230	0.00993
71	rs4936098	11	130410772	ADAMTS8	ADAMTS8	intron	A/G	0.36	AA,EA	PP	CURD	0.49(0.07)	-0.05(0.07)	1.23e-52	389781	0.0794
72	rs2417823	12	20035157	LOC100506393	LOC100506393	intron	C/G	0.34	ASA,EA	MAP	CURD	-0.24(0.04)	0.07(0.05)	3.63e-13	511735	0.848
72	rs4306343	12	20037696	LOC100506393	LOC100506393	intron	A/T	0.34	ASA,EA	DBP	CURD	-0.25(0.04)	-0.04(0.05)	2.82e-31	511739	0.579
73	rs12319419	12	54026992	HOXC4	HOXC4	intron	C/G	0.36	EA,HA	SBP	CURD	-0.49(0.09)	0.00(0.11)	2.82e-41	379539	0.0414
73	rs7308105	12	54030339	HOXC4	HOXC4	intron	T/C	0.64	AA,EA,HA	PP	CURD	0.20(0.06)	-0.02(0.07)	2.04e-10	397382	0.00703
73	rs4759319	12	54030947	HOXC4	HOXC4	intron	T/G	0.38	ASA,EA	MAP	CURD	-0.28(0.05)	0.14(0.06)	3.98e-13	509239	0.814
73	rs4759319	12	54030947	HOXC4	HOXC4	intron	T/G	0.36	AA,EA	SBP	LHD	-0.39(0.07)	0.14(0.13)	5.01e-08	170940	0.0929
73	rs4759319	12	54030947	HOXC4	HOXC4	intron	T/G	0.36	AA,EA	MAP	LHD	-0.27(0.05)	0.07(0.09)	3.89e-08	170171	0.258
73	rs2071449	12	54034227	HOXC4	HOXC4	intron	A/C	0.37	ASA,EA	DBP	CURD	-0.27(0.04)	0.12(0.05)	6.76e-17	517938	0.569
74	rs7302816	12	89556543	LOC102724782	POC1B	intron	A/C	0.81	EA,HA	MAP	CURD	0.45(0.08)	-0.18(0.09)	2.09e-17	379273	0.285
74	rs1689040	12	89584456	LOC102724782	ATP2B1	intron	T/C	0.39	ASA,EA	SBP	CURD	-0.68(0.07)	0.06(0.08)	3.02e-68	506770	0.0274
74	rs1689040	12	89584456	LOC102724782	ATP2B1	intron	T/C	0.39	EA,HA	DBP	CURD	-0.28(0.06)	-0.07(0.06)	1.66e-40	379535	0.366
75	rs2681492	12	89619312	ATP2B1	ATP2B1	intron	T/C	0.78	ASA,EA	PP	CURD	0.42(0.05)	0.02(0.06)	5.13e-46	501697	0.905
75	rs12579302	12	89656726	ATP2B1		intron	A/G	0.78	AA,ASA,EA	SBP	CURD	0.85(0.07)	0.17(0.09)	9.55e-165	537337	0.04345
75	rs111478946	12	89665065	ATP2B1	ATP2B1	intron	A/G	0.21	AA,ASA,EA	MAP	CURD	-0.51(0.05)	0.13(0.06)	1.55e-42	535441	0.0165
75	rs111478946	12	89665065	ATP2B1	ATP2B1	intron	A/G	0.21	ASA,EA	DBP	CURD	-0.38(0.05)	-0.05(0.06)	2.46e-48	508985	0.335
75	rs73437358	12	89678299	ATP2B1	ATP2B1	intron	A/G	0.16	AA,EA	DBP	LHD	-0.42(0.06)	-0.02(0.11)	1.2e-16	164197	0.27
75	rs4842676	12	89698005	ATP2B1	LOC338758	intron	C/G	0.82	AA,EA	MAP	LHD	0.49(0.06)	-0.00(0.12)	3.89e-19	169820	0.991
76	rs7299436	12	89719293	LINC00936	LOC338758		T/G	0.85	AA,EA	SBP	CURD	0.75(0.13)	-0.06(0.15)	1.82e-32	385274	0.471
76	rs7299436	12	89719293	LINC00936	LOC338758		T/G	0.85	AA,EA	MAP	CURD	0.52(0.09)	-0.22(0.10)	4.27e-18	385271	0.988
76	rs7299436	12	89719293	LINC00936	LOC338758		T/G	0.85	AA,EA	PP	CURD	0.30(0.09)	0.07(0.10)	1.66e-19	379863	0.318
77	rs1265564	12	111270654	CUX2	CUX2	intron	A/C	0.59	AA,EA,HA	SBP	CURD	-0.27(0.10)	-0.07(0.11)	1.74e-13	397321	0.381
77	rs1265564	12	111270654	CUX2	CUX2	intron	A/C	0.59	AA,EA	MAP	CURD	-0.20(0.07)	0.03(0.08)	2.4e-08	379885	0.125
78	rs7310615	12	111427245	SH2B3	SH2B3	intron	C/G	0.45	AA,EA,HA	MAP	CURD	0.35(0.06)	-0.11(0.07)	1.51e-20	393118	0.0281
78	rs3184504	12	111446804	SH2B3	SH2B3	missense	T/C	0.47	EA,HA	SBP	CURD	0.44(0.09)	0.04(0.10)	4.47e-29	373374	0.581
79	rs7137828	12	111494996	ATXN2	ATXN2	intron	T/C	0.53	EA,HA	MAP	CURD	-0.34(0.06)	0.09(0.07)	2.34e-19	367688	0.0155
79	rs597808	12	111535554	ATXN2	ATXN2	intron	A/G	0.47	AA,EA	DBP	CURD	0.43(0.06)	0.01(0.07)	8.13e-60	369383	0.608
79	rs597808	12	111535554	ATXN2	ATXN2	intron	A/G	0.49	EA,HA	SBP	CURD	0.45(0.10)	0.09(0.11)	7.94e-32	362288	0.762
80	rs11065979	12	111621753	BRAP	BRAP		T/C	0.43	EA,HA	SBP	CURD	0.35(0.10)	0.11(0.11)	1.55e-23	370468	0.324
80	rs11065979	12	111621753	BRAP	BRAP		T/C	0.43	EA,HA	MAP	CURD	0.29(0.07)	-0.07(0.07)	2.29e-14	370460	0.00329
81	rs4766897	12	111741667	ACAD10	ACAD10	intron	T/C	0.31	AA,EA,HA	SBP	CURD	0.44(0.12)	-0.04(0.13)	1.7e-15	380465	0.0849
81	rs4766897	12	111741667	ACAD10	ACAD10	intron	T/C	0.31	AA,EA,HA	MAP	CURD	0.33(0.08)	-0.15(0.09)	9.77e-10	380456	0.00115
82	rs2013002	12	111762346	ALDH2	ALDH2		T/C	0.4	AA,EA,HA	SBP	CURD	0.38(0.10)	0.05(0.11)	8.71e-21	394995	0.115
82	rs2013002	12	111762346	ALDH2	ALDH2		T/C	0.39	AA,EA,HA	MAP	CURD	0.29(0.07)	-0.08(0.07)	4.68e-13	394986	0.00115
83	rs11513729	12	111835695	MAPKAPK5-AS1	MAPKAPK5-AS1		T/C	0.4	AA,EA	DBP	CURD	0.38(0.06)	-0.02(0.07)	7.76e-40	378467	0.209
83	rs11513729	12	111835695	MAPKAPK5-AS1	MAPKAPK5-AS1		T/C	0.4	AA,EA	SBP	CURD	0.40(0.10)	0.03(0.12)	6.46e-20	378466	0.0593
83	rs11513729	12	111835695	MAPKAPK5-AS1	MAPKAPK5-AS1		T/C	0.4	AA,EA	MAP	CURD	0.27(0.07)	-0.08(0.08)	1.82e-10	378463	0.0194
84	rs4767293	12	112025492	NAA25	NAA25		A/G	0.64	AA,EA	SBP	CURD	0.34(0.10)	0.09(0.11)	6.46e-21	383078	0.0218
84	rs17696736	12	112049014	NAA25	NAA25	intron	A/G	0.6	AA,EA,HA	MAP	CURD	-0.27(0.06)	0.08(0.07)	5.75e-12	402985	0.00652
84	rs17696736	12	112049014	NAA25	NAA25	intron	A/G	0.59	AA,EA	DBP	CURD	-0.33(0.06)	0.01(0.06)	1.45e-34	385623	0.165
85	rs7953257	12	112246417	HECTD4	HECTD4	intron	A/T	0.4	AA,EA	DBP	CURD	0.38(0.06)	-0.02(0.07)	5.25e-39	379218	0.205
85	rs7953257	12	112246417	HECTD4	HECTD4	intron	A/T	0.4	AA,EA	SBP	CURD	0.40(0.10)	0.04(0.12)	3.72e-20	379217	0.0545
85	rs7953257	12	112246417	HECTD4	HECTD4	intron	A/T	0.4	AA,EA	MAP	CURD	0.26(0.07)	-0.07(0.08)	3.31e-10	379214	0.0354
86	rs35443	12	115115073	LOC102723639	TBX3		C/G	0.36	AA,ASA,EA,HA	SBP	CURD	-0.53(0.06)	0.07(0.08)	1.35e-41	553465	0.0764
86	rs35443	12	115115073	LOC102723639	TBX3		C/G	0.36	AA,ASA,EA	DBP	CURD	-0.34(0.04)	0.06(0.05)	2.14e-40	536031	0.301
86	rs35443	12	115115073	LOC102723639	TBX3		C/G	0.36	AA,ASA,EA	MAP	CURD	-0.38(0.05)	0.11(0.05)	6.92e-34	536027	0.0189
87	rs627634	15	48587094	FBN1	FBN1	intron	T/C	0.09	AA,EA	PP	CURD	-0.65(0.11)	0.14(0.12)	1.32e-29	375353	0.15
87	rs686861	15	48592808	FBN1	FBN1	intron	A/G	0.91	AA,EA	SBP	CURD	0.60(0.15)	-0.14(0.17)	2.46e-12	383236	0.171
88	rs1350193	15	74791940	CSK	CSK	intron	C/G	0.68	ASA,EA	DBP	LHD	-0.27(0.05)	-0.01(0.07)	2.69e-13	215871	0.642
88	rs2301249	15	74800043	CSK	CSK	intron	T/C	0.32	ASA,EA	SBP	LHD	0.44(0.07)	-0.00(0.11)	4.9e-14	216165	0.763
88	rs2301249	15	74800043	CSK	CSK	intron	T/C	0.32	ASA,EA	MAP	LHD	0.32(0.05)	0.01(0.08)	1.41e-15	215396	0.775
89	rs12441505	15	74814970	LMAN1L	LMAN1L	intron	A/C	0.33	ASA,EA	MAP	LHD	0.32(0.05)	0.02(0.08)	2.29e-15	215104	0.76
89	rs7162232	15	74823554	LMAN1L	LMAN1L	intron	A/G	0.68	ASA,EA	SBP	LHD	-0.44(0.07)	0.03(0.12)	1.45e-13	214038	0.685
90	rs9210	15	74836160	ULK3	ULK3	nc-transcript	T/C	0.29	ASA,EA	SBP	LHD	0.40(0.07)	-0.06(0.12)	2.46e-10	214038	0.405
90	rs9210	15	74836160	ULK3	ULK3	nc-transcript	T/C	0.29	ASA,EA	MAP	LHD	0.31(0.05)	-0.05(0.08)	7.59e-12	213269	0.325
90	rs2290574	15	74843106	ULK3	ULK3	nc-transcript	T/C	0.3	ASA,EA	DBP	LHD	0.26(0.05)	-0.03(0.08)	6.61e-11	213744	0.0927
91	rs1133322	15	74920016	COX5A	COX5A	downstream-500B	A/G	0.55	ASA,EA	SBP	LHD	0.40(0.07)	-0.03(0.11)	3.8e-12	216048	0.335
91	rs4886640	15	74935628	COX5A	COX5A	intron	A/T	0.51	AA,EA	SBP	CURD	-0.27(0.09)	-0.09(0.10)	6.03e-16	388565	0.000465
92	rs60932332	15	74962226	RPP25	RPP25		D/I	0.52	AA,EA	SBP	CURD	0.45(0.11)	-0.13(0.12)	8.32e-13	303615	0.00942
92	rs12050759	15	74972850	RPP25	RPP25		A/G	0.36	ASA,EA	DBP	CURD	0.06(0.04)	0.20(0.05)	3.02e-19	501817	5.75e-06
93	rs1108059	15	75046549	PPCDC	PPCDC	intron	A/C	0.72	ASA,EA	DBP	CURD	-0.09(0.04)	-0.09(0.05)	3.39e-10	510195	0.121
94	rs8029440	15	90866284	FURIN	FURIN		A/G	0.35	AA,EA	DBP	LHD	0.38(0.05)	-0.02(0.09)	1.02e-17	154369	0.0664
94	rs8027450	15	90875164	FURIN	FURIN	intron	T/C	0.32	AA,EA	PP	CURD	0.09(0.07)	0.22(0.08)	3.02e-18	365269	0.00303
94	rs1573643	15	90877743	FURIN	FURIN	intron	T/C	0.74	ASA,EA	DBP	CURD	-0.34(0.06)	-0.03(0.07)	5.5e-37	480768	0.138
94	rs1573643	15	90877743	FURIN	FURIN	intron	T/C	0.74	ASA,EA	MAP	CURD	-0.41(0.07)	0.11(0.07)	1.41e-24	480764	0.0429
94	rs6227	15	90882002	FURIN	FURIN	utr-3	T/C	0.32	AA,EA	SBP	CURD	0.38(0.10)	0.29(0.12)	8.13e-39	365272	0.0977
95	rs35346340	15	90884642	FES	FES	intron	C/G	0.32	AA,EA	MAP	CURD	0.28(0.07)	0.02(0.08)	5.13e-19	365269	0.511
95	rs1894400	15	90885725	FES	FES	intron	T/C	0.32	AA,EA	PP	CURD	0.17(0.07)	0.14(0.08)	3.55e-19	354890	0.291
95	rs7497304	15	90885946	FES	FES	intron	T/G	0.32	AA,EA	SBP	CURD	0.42(0.10)	0.26(0.12)	7.59e-41	365272	0.174
96	rs7209400	17	49372695	LOC102724596	ZNF652	intron	T/C	0.54	AA,EA	DBP	CURD	0.23(0.05)	-0.00(0.06)	1.05e-18	375442	0.0435
96	rs7209400	17	49372695	LOC102724596	ZNF652	intron	T/C	0.54	AA,EA	SBP	CURD	0.31(0.09)	-0.03(0.10)	2.82e-11	375441	0.00604
96	rs7209400	17	49372695	LOC102724596	ZNF652	intron	T/C	0.53	AA,EA	MAP	CURD	0.22(0.06)	-0.05(0.07)	5.5e-10	375438	0.00266
96	rs7209400	17	49372695	LOC102724596	ZNF652	intron	T/C	0.54	AA,EA	DBP	LHD	0.27(0.04)	-0.07(0.08)	1.02e-10	164461	0.421
96	rs7209400	17	49372695	LOC102724596	ZNF652	intron	T/C	0.54	AA,EA	MAP	LHD	0.28(0.05)	-0.08(0.09)	5.37e-09	163694	0.133
97	rs1887320	20	10985350	C20orf187	LOC339593	intron	A/G	0.46	AA,EA	SBP	LHD	0.32(0.07)	0.09(0.12)	2.46e-09	176537	0.51
97	rs6108787	20	10986566	C20orf187	LOC339593	intron	T/G	0.53	AA,EA	DBP	CURD	-0.23(0.05)	-0.04(0.06)	1.59e-25	388568	0.472
97	rs6108787	20	10986566	C20orf187	LOC339593	intron	T/G	0.53	AA,EA	SBP	CURD	-0.29(0.09)	-0.09(0.10)	9.33e-19	388567	0.664
97	rs6108787	20	10986566	C20orf187	LOC339593	intron	T/G	0.53	AA,EA	MAP	CURD	-0.23(0.06)	-0.02(0.07)	7.76e-18	388564	0.477
97	rs6108787	20	10986566	C20orf187	LOC339593	intron	T/G	0.54	AA,EA	DBP	LHD	-0.26(0.04)	-0.02(0.08)	6.61e-13	171071	0.175
97	rs6108787	20	10986566	C20orf187	LOC339593	intron	T/G	0.54	AA,EA	MAP	LHD	-0.30(0.05)	-0.02(0.09)	8.71e-13	170304	0.286
98	rs259983	20	59160402	ZNF831	ZNF831	intron	A/C	0.87	ASA,EA	SBP	CURD	-0.53(0.11)	0.04(0.12)	6.46e-21	509981	0.777
98	rs6026740	20	59165293	ZNF831	ZNF831	intron	A/G	0.87	AA,EA	DBP	CURD	-0.45(0.08)	-0.01(0.09)	6.46e-34	376581	0.779
98	rs6026740	20	59165293	ZNF831	ZNF831	intron	A/G	0.87	AA,EA	MAP	CURD	-0.41(0.09)	0.09(0.10)	3.8e-15	376577	0.962
98	rs6026740	20	59165293	ZNF831	ZNF831	intron	A/G	0.86	AA,EA	MAP	LHD	-0.44(0.08)	0.12(0.13)	8.32e-10	157228	0.192
98	rs73306888	20	59173534	ZNF831	ZNF831	intron	A/G	0.14	AA,EA	DBP	LHD	0.39(0.07)	-0.02(0.12)	3.63e-11	163736	0.231
The most significant associated SNVs are shown per gene for each Blood Pressure (BP) trait and alcohol status. Abbreviations: Nb, order number based on genes; SNV, single nucleotide variant; Chr, chromosome; Position, Gene, and Role in dbSNP build 150 (hg38) annotation; Role: Intronic, missense, up-stream or downstream, or intergenic (blank space) SNV; Near gene reflects genes at up to +/-500 kb …
