# Supplementary material for: Novel genetic associations for blood pressure identified via gene-alcohol interaction in up to 570K individuals across multiple ancestries
Source: PLoS One. 2018 Jun 18;13(6):e0198166. doi: 10.1371/journal.pone.0198166 (PMC6005576; doi:10.1371/journal.pone.0198166)
Supplement: S13 Table — Association findings from European Ancestry (novel), African Ancestry (potential) and correlated meta-analysis (novel variants). The annotation of variants was sourced from NCBI dbSNP build 138 (hg19) during the analyses and updated to dbSNP build 150 (hg38) for reporting results. Abbreviations: Nb, order number based on SNVs; Position, dbSNP build 150 (hg38) annotation; Variant, single nucleotide variant (SNV); Ref, reference allele; Alt, alternative allele; AFR Freq, Freq of Ref in African ancestry; ASN Freq, Freq of Ref in East Asian ancestry; EUR Freq, Freq of Ref in European ancestry; GERP cons and Siphy cons, measured conserved regions. RegulomeDB scoring has classes defined as 1b, 1d and 1f: likely to affect binding and linked to expression of a gene target, with details: 1b (eQTL + TF binding + any motif + DNase footprint + DNase peak); 1d (eQTL + TF binding + any motif + DNase peak); 1f (eQTL + TF binding/DNase peak), 2a and 2b: likely to affect binding, 3a: less likely to affect binding, 4, 5, and 6: minimal binding evidence, and 7: no data. This software was accessed on 06.15.2017. Regulatory function measured by Promoter histone marks, Enhancer histone marks, DNase (DNAse hypersensitivity), Proteins bound, Motifs changed. (XLSX) [file pone.0198166.s033.xlsx]

## Sheet: S13 Table
S13 Table. SNVs/genes associated with BP traits for regulatory features using HaploReg and RegulomeDB. Association findings from European ancestry (novel), African ancestry (potential) and correlated meta-analysis (novel variants).
	A. Novel SNVs/Genes for BP
Nb	Chr	Position (hg38)	Variant	Ref	Alt	AFR freq	AMR freq	ASN freq	EUR freq	GERP cons	Siphy cons	Promoter histone marks	Enhancer histone marks	DNAse	Proteins bound	Motifs changed	NHGRI/EBI GWAS hits	GRASP QTL hits	Selected eQTL hits	GENCODE genes	dbSNP func annot	SNV	Chr138	Position 138 (hg19)	HUGO 138 (hg19)	chr150 (hg38)	Position 150 (hg38)	HUGO 150 (hg38)	P Value for Stage 1 and Stage 2	RegulomeDB score*
1	8	8452998	rs2979172	G	C	0.43	0.6	0.91	0.48				7 tissues	BLD,BLD,BLD		AP-1,E2A			22 hits	3.9kb 3' of CTA-398F10.2		rs2979172	8	8310508	SGK223	8	8452998	LOC107986913	3.631e-18	5
2	8	8453413	rs876954	G	A	0.72	0.62	0.91	0.48				7 tissues	BRN,BRN				1 hit	26 hits	3.5kb 3' of CTA-398F10.2		rs876954	8	8310923	SGK223	8	8453413	LOC107986913	7.413e-18	7
3	8	8459127	rs2921064	C	T	0.72	0.56	0.9	0.44				5 tissues						22 hits	CTA-398F10.2		rs2921064	8	8316637	SGK223	8	8459127	LOC107986913	2.951e-16	7
4	8	8460105	rs2921061	A	T	0.74	0.57	0.9	0.45				4 tissues			GATA			21 hits	CTA-398F10.2		rs2921061	8	8317615	SGK223	8	8460105	LOC107986913	6.026e-16	7
5	8	8460307	rs2921060	A	C	0.64	0.56	0.9	0.45				5 tissues			Hbp1		5 hits	24 hits	CTA-398F10.2		rs2921060	8	8317817	SGK223	8	8460307	LOC107986913	8.128e-16	6
6	8	8460585	rs2980766	T	C	0.73	0.57	0.89	0.44				5 tissues			Hic1,NRSF,Zic			22 hits	CTA-398F10.2		rs2980766	8	8318095	SGK223	8	8460585	LOC107986913	3.548e-16	7
7	8	8461157	rs2921057	C	T	0.74	0.59	0.9	0.46			GI, BLD	8 tissues	5 tissues		MZF1::1-4,Spz1			21 hits	CTA-398F10.2		rs2921057	8	8318667	SGK223	8	8461157	LOC107986913	2.239e-16	4
8	8	8461340	rs2976876	T	C	0.41	0.56	0.9	0.42			BLD	9 tissues	11 tissues	ERALPHA_A,FOXA1,P300	MAZ,NRSF,Rad21		2 hits	26 hits	2bp 5' of CTA-398F10.2		rs2976876	8	8318850	SGK223	8	8461340	LOC107986913	1.288e-14	3a
9	8	8461672	rs2921056	T	C	0.42	0.56	0.9	0.42			BLD, LIV	11 tissues	7 tissues	ERALPHA_A,FOXA1	TAL1			21 hits	334bp 5' of CTA-398F10.2		rs2921056	8	8319182	SGK223	8	8461672	LOC107986913	1.698e-15	3a
10	8	8462453	rs2921053	G	C	0.42	0.58	0.91	0.45				6 tissues	IPSC,GI		5 altered motifs			22 hits	1.1kb 5' of CTA-398F10.2		rs2921053	8	8319963	SGK223	8	8462453	LOC107986913	6.457e-17	5
11	8	8462519	rs2979179	G	A	0.41	0.56	0.89	0.42				6 tissues			ATF3,Crx,HEY1		4 hits	21 hits	1.2kb 5' of CTA-398F10.2		rs2979179	8	8320029	SGK223	8	8462519	LOC107986913	1.585e-15	1f
12	8	8462594	rs2921051	C	A	0.53	0.57	0.89	0.45				6 tissues			LUN-1			23 hits	1.3kb 5' of CTA-398F10.2		rs2921051	8	8320104	SGK223	8	8462594	LOC107986913	1.862e-16	7
13	8	8463701	rs201153309	TTC	T	0.07	0	0	0				5 tissues	MUS		22 altered motifs				2.4kb 5' of CTA-398F10.2		rs201153309	8	8321212	SGK223	8	8463702	LOC107986913	2.042e-12
14	8	8465578	rs2979181	A	T	0.75	0.61	0.92	0.48				4 tissues	BLD,BRST	MAFF,MAFK	Maf			25 hits	4.2kb 5' of CTA-398F10.2		rs2979181	8	8323088	SGK223	8	8465578	LOC107986913	7.413e-18	5
15	8	8506173	rs2980755	A	G	0.46	0.47	0.67	0.47				IPSC			4 altered motifs			27 hits	45kb 5' of CTA-398F10.2		rs2980755	8	8363683	SGK223	8	8506173	LOC107986913	5.623e-18	7
16	8	8515975	rs10092965	A	G	0.21	0.55	0.88	0.45							ERalpha-a,SREBP,Sox			27 hits	40kb 3' of CTD-3023L14.3		rs10092965	8	8373485	SGK223	8	8515975	LOC105379224	6.918e-18	7
17	8	8516047	rs10087493	C	T	0.21	0.55	0.88	0.45							Eomes		3 hits	26 hits	40kb 3' of CTD-3023L14.3		rs10087493	8	8373557	SGK223	8	8516047	LOC105379224	4.169e-18	6
18	8	8516446	rs7010753	A	G	0.21	0.55	0.88	0.44				4 tissues			Hsf,Pou2f2			26 hits	39kb 3' of CTD-3023L14.3		rs7010753	8	8373956	SGK223	8	8516446	LOC105379224	4.365e-18	6
19	8	8520592	rs13270194	T	C	0.63	0.61	0.88	0.49				BRST, BLD, SKIN	BLD,LNG		Pax-4,SREBP,Zic			23 hits	35kb 3' of CTD-3023L14.3		rs13270194	8	8378102	SGK223	8	8520592	LOC105379224	2.344e-20	7
20			rs74813974	TG	T,TC								BRST, SKIN	SKIN						35kb 3' of CTD-3023L14.3		rs74813974	8	8378463	SGK223				9.772e-16
21	8	8521482	rs7837587	T	C	0.62	0.61	0.88	0.49				BRST, SKIN	THYM,BLD		4 altered motifs		2 hits	27 hits	34kb 3' of CTD-3023L14.3		rs7837587	8	8378992	SGK223	8	8521482	LOC105379224	1.622e-19	7
22	8	8522004	rs7009054	T	C	0.58	0.59	0.88	0.49				BRST, SKIN, PLCNT						23 hits	34kb 3' of CTD-3023L14.3		rs7009054	8	8379514	SGK223	8	8522004	LOC105379224	6.166e-19	7
23	8	8522714	rs6601703	A	G	0.62	0.61	0.88	0.49			SKIN	8 tissues	7 tissues	GATA2	Bcl6b			23 hits	33kb 3' of CTD-3023L14.3		rs6601703	8	8380224	SGK223	8	8522714	LOC105379224	2.188e-20	3a
24	8	8522961	rs7827182	G	C	0.62	0.6	0.88	0.49				7 tissues	SKIN,GI				4 hits	23 hits	33kb 3' of CTD-3023L14.3		rs7827182	8	8380471	SGK223	8	8522961	LOC105379224	5.012e-20	6
25	8	8523020	rs7817376	T	C	0.62	0.61	0.88	0.49				7 tissues	SKIN,VAS		6 altered motifs		4 hits	24 hits	33kb 3' of CTD-3023L14.3		rs7817376	8	8380530	SGK223	8	8523020	LOC105379224	3.89e-20	6
26	8	8525195	rs7823056	A	G	0.54	0.61	0.88	0.49				7 tissues			TCF12			27 hits	31kb 3' of CTD-3023L14.3		rs7823056	8	8382705	SGK223	8	8525195	LOC105379224	1.072e-19	7
27	8	8527137	rs6995407	C	G	0.54	0.61	0.88	0.49				9 tissues	IPSC,SKIN		6 altered motifs			27 hits	29kb 3' of CTD-3023L14.3		rs6995407	8	8384647	SGK223	8	8527137	LOC105379224	1.778e-20	5
28	8	8529585	rs7826238	G	T	0.38	0.55	0.88	0.45				OVRY, LIV			STAT			25 hits	26kb 3' of CTD-3023L14.3		rs7826238	8	8387095	SGK223	8	8529585	LOC105379224	4.467e-19	6
29	8	9171903	rs435581	A	G	0.56	0.63	0.91	0.49			BLD	ESC, ESDR, IPSC	6 tissues	6 bound proteins	4 altered motifs		2 hits	23 hits	3.8kb 3' of RP11-10A14.4		rs435581	8	9029413	PPP1R3B	8	9171903	LOC102724880	1.95e-14	4
30	8	9172877	rs453301	T	G	0.52	0.62	0.86	0.48			BLD	8 tissues	BLD		Zec			21 hits	4.7kb 3' of RP11-10A14.4		rs453301	8	9030387	PPP1R3B	8	9172877	LOC102724880	1.23e-15	5
31	8	9175583	rs393155	G	A	0.34	0.62	0.86	0.49							FXR			19 hits	4.7kb 3' of RP11-10A14.6		rs393155	8	9033093	PPP1R3B	8	9175583	LOC102724880	1.122e-15	5
32	8	9176234	rs439989	C	G	0.12	0.61	0.9	0.5							6 altered motifs		1 hit	24 hits	4kb 3' of RP11-10A14.6		rs439989	8	9033744	PPP1R3B	8	9176234	LOC102724880	1.413e-14	6
33	8	9282318	rs11998274	G	C	0.29	0.47	0.52	0.35					ADRL		EBF,Ets,Ik-2			7 hits	RP11-115J16.1		rs11998274	8	9139828	LOC157273	8	9282318	LOC157273	2.63e-14	7
34	8	9286011	rs11249913	T	G	0.12	0.4	0.43	0.38				ESC, BLD			Pou1f1		2 hits	6 hits	RP11-115J16.1		rs11249913	8	9143521	LOC157273	8	9286011	LOC157273	4.266e-15	6
35	8	9288078	rs36111783	A	G	0.08	0.38	0.44	0.38										5 hits	RP11-115J16.1		rs36111783	8	9145588	LOC157273	8	9288078	LOC157273	1.096e-15	7
36	8	9291320	rs7002693	G	C	0.39	0.4	0.48	0.38				ESDR, GI						6 hits	RP11-115J16.1		rs7002693	8	9148830	LOC157273	8	9291320	LOC157273	2.188e-15	7
37	8	9292236	rs330088	T	C	0.36	0.66	0.96	0.51				4 tissues			Irx			9 hits	RP11-115J16.1		rs330088	8	9149746	LOC157273	8	9292236	LOC157273	1.66e-13	6
38	8	9293015	rs10503387	C	T	0.14	0.4	0.44	0.38					HRT		Pou2f2			6 hits	RP11-115J16.1		rs10503387	8	9150525	LOC157273	8	9293015	LOC157273	7.762e-16	5
39	8	9293541	rs62493780	C	T	0.02	0.28	0.15	0.27				HRT	HRT		Arnt,BHLHE40,Mxi1			6 hits	RP11-115J16.1		rs62493780	8	9151051	LOC157273	8	9293541	LOC157273	1.738e-11	7
40	8	9293716	rs719409	C	T	0.14	0.4	0.44	0.38				HRT			HNF1			6 hits	RP11-115J16.1		rs719409	8	9151226	LOC157273	8	9293716	LOC157273	6.457e-15	7
41	8	9295617	rs11774353	C	T	0.13	0.42	0.43	0.37				ESDR, HRT	HRT				2 hits	6 hits	RP11-115J16.1		rs11774353	8	9153127	LOC157273	8	9295617	LOC157273	4.074e-16	6
42	8	9295729	rs11781008	G	T	0.08	0.41	0.43	0.37				HRT	HRT		4 altered motifs			6 hits	RP11-115J16.1		rs11781008	8	9153239	LOC157273	8	9295729	LOC157273	7.413e-16	6
43	8	9331252	rs11774915	C	T	0.08	0.41	0.33	0.31							SREBP			5 hits	RP11-115J16.1	intronic	rs11774915	8	9188762	LOC157273	8	9331252	LOC157273	8.913e-15	7
44	8	9381948	rs6601302	T	G	0.85	0.8	0.72	0.78							DMRT1		1 hit	3 hits	RP11-115J16.2		rs6601302	8	9239458	LOC157273	8	9381948	LOC105379231	2.57e-10	6
45	8	9531731	rs13262031	T	C	0.26	0.57	0.35	0.65							10 altered motifs			3 hits	24kb 5' of TNKS		rs13262031	8	9389241	TNKS	8	9531731	TNKS	8.913e-15	6
46	8	9715644	rs12114661	G	A	0.5	0.59	0.46	0.66							PPAR,RXRA,YY1			3 hits	TNKS	intronic	rs12114661	8	9573154	TNKS	8	9715644	TNKS	2.754e-15	7
47	8	9715774	rs4129360	T	A	0.5	0.59	0.46	0.66							4 altered motifs			3 hits	TNKS	intronic	rs4129360	8	9573284	TNKS	8	9715774	TNKS	3.467e-15	7
48	8	9717809	rs13272424	T	G	0.48	0.59	0.46	0.66				MUS			4 altered motifs			3 hits	TNKS	intronic	rs13272424	8	9575319	TNKS	8	9717809	TNKS	1.862e-15	6
49	8	9717821	rs13264850	A	T	0.5	0.59	0.46	0.66				MUS			Gfi1,Mef2,SPIB			3 hits	TNKS	intronic	rs13264850	8	9575331	TNKS	8	9717821	TNKS	3.981e-15	7
50	8	9720745	rs6994574	G	A	0.55	0.59	0.46	0.66			BLD	BLD, KID	BLD	NFKB	8 altered motifs			3 hits	TNKS	intronic	rs6994574	8	9578255	TNKS	8	9720745	TNKS	2.63e-15	5
51	8	9721472	rs13276086	T	G	0.52	0.6	0.46	0.66							7 altered motifs			4 hits	TNKS	intronic	rs13276086	8	9578982	TNKS	8	9721472	TNKS	4.571e-15	6
52	8	9721739	rs13268319	C	A	0.51	0.6	0.45	0.66							CEBPB,STAT,Zfp187			3 hits	TNKS	intronic	rs13268319	8	9579249	TNKS	8	9721739	TNKS	5.888e-15	7
53	8	9722491	rs4612345	A	G	0.52	0.6	0.46	0.66							Foxa,Pou5f1			3 hits	TNKS	intronic	rs4612345	8	9580001	TNKS	8	9722491	TNKS	2.239e-15	7
54	8	9723560	rs6982148	G	C	0.5	0.59	0.46	0.66							5 altered motifs			3 hits	TNKS	intronic	rs6982148	8	9581070	TNKS	8	9723560	TNKS	2.754e-15	6
55	8	9725220	rs4841203	A	G	0.52	0.6	0.46	0.66							HNF4,RXRA			3 hits	TNKS	intronic	rs4841203	8	9582730	TNKS	8	9725220	TNKS	2.291e-15	6
56	8	9725897	rs4841204	G	A	0.52	0.59	0.46	0.66										3 hits	TNKS	intronic	rs4841204	8	9583407	TNKS	8	9725897	TNKS	1.66e-15	7
57	8	9727339	rs12679956	G	A	0.48	0.58	0.46	0.66							Mef2,Nkx3			3 hits	TNKS	intronic	rs12679956	8	9584849	TNKS	8	9727339	TNKS	1.66e-15	6
58	8	9727686	rs12542912	C	T	0.52	0.59	0.46	0.66							Mef2			3 hits	TNKS	intronic	rs12542912	8	9585196	TNKS	8	9727686	TNKS	2.138e-15	6
59	8	9729194	rs6992666	A	C	0.48	0.59	0.44	0.66			IPSC	ESDR, BLD	4 tissues		THAP1			3 hits	TNKS	intronic	rs6992666	8	9586704	TNKS	8	9729194	TNKS	2.57e-15	5
60	8	9729765	rs7014663	G	T	0.52	0.58	0.45	0.65				BLD			5 altered motifs			3 hits	TNKS	intronic	rs7014663	8	9587275	TNKS	8	9729765	TNKS	3.09e-14	7
61	8	9730064	rs11778555	C	T	0.52	0.59	0.45	0.66				BLD			4 altered motifs			3 hits	TNKS	intronic	rs11778555	8	9587574	TNKS	8	9730064	TNKS	2.344e-15	7
62	8	9730164	rs11785923	G	C	0.52	0.59	0.46	0.66			ESDR		ESDR		EWSR1-FLI1,Hic1			3 hits	TNKS	intronic	rs11785923	8	9587674	TNKS	8	9730164	TNKS	2.63e-15	4
63	8	9730381	rs11782886	A	G	0.53	0.59	0.46	0.66			ESDR				Myc,XBP-1			3 hits	TNKS	intronic	rs11782886	8	9587891	TNKS	8	9730381	TNKS	3.02e-15	5
64	8	9732606	rs9644707	A	T	0.51	0.59	0.44	0.66							8 altered motifs			3 hits	TNKS	intronic	rs9644707	8	9590116	TNKS	8	9732606	TNKS	2.399e-15	6
65	8	9733888	rs4841207	C	T	0.65	0.64	0.56	0.72							12 altered motifs			2 hits	TNKS	intronic	rs4841207	8	9591398	TNKS	8	9733888	TNKS	6.026e-11	6
66	8	9746556	rs35169606	T	G	0.03	0.24	0.03	0.41							6 altered motifs			3 hits	TNKS	intronic	rs35169606	8	9604066	TNKS	8	9746556	TNKS	2.344e-14	6
67	8	9751081	rs12541709	C	G	0.34	0.34	0.33	0.23					IPSC		Nr2f2			2 hits	TNKS	intronic	rs12541709	8	9608591	TNKS	8	9751081	TNKS	2.138e-12	7
68	8	9753028	rs6989782	C	T	0.18	0.33	0.41	0.28				BLD			Mef2		1 hit	1 hit	TNKS	intronic	rs6989782	8	9610538	TNKS	8	9753028	TNKS	6.166e-12	5
69	8	9753491	rs7014007	A	G	0.28	0.35	0.41	0.28										1 hit	TNKS	intronic	rs7014007	8	9611001	TNKS	8	9753491	TNKS	6.457e-12	7
70	8	9753960	rs10102170	C	T	0.5	0.41	0.5	0.34					BLD		7 altered motifs			3 hits	TNKS	intronic	rs10102170	8	9611470	TNKS	8	9753960	TNKS	4.365e-16	7
71	8	9754499	rs10094989	T	C	0.5	0.42	0.5	0.34							6 altered motifs			3 hits	TNKS	intronic	rs10094989	8	9612009	TNKS	8	9754499	TNKS	2.344e-16	6
72	8	9755372	rs28693548	T	C	0.22	0.35	0.42	0.28							6 altered motifs			1 hit	TNKS	intronic	rs28693548	8	9612882	TNKS	8	9755372	TNKS	4.074e-12	7
73	8	9756002	rs7006003	C	G	0.22	0.35	0.41	0.28							E2F,ERalpha-a,MIF-1			1 hit	TNKS	intronic	rs7006003	8	9613512	TNKS	8	9756002	TNKS	3.715e-12	6
74	8	9756044	rs7004915	G	A	0.2	0.34	0.41	0.28										1 hit	TNKS	intronic	rs7004915	8	9613554	TNKS	8	9756044	TNKS	2.291e-12	7
75	8	9756976	rs7827369	T	G	0.18	0.35	0.41	0.28							15 altered motifs			1 hit	TNKS	intronic	rs7827369	8	9614486	TNKS	8	9756976	TNKS	2.089e-12	6
76	8	9761838	rs4383974	C	G	0.28	0.34	0.42	0.28				LIV						1 hit	TNKS	intronic	rs4383974	8	9619348	TNKS	8	9761838	TNKS	2.042e-13	5
77	8	9762399	rs35231275	T	A	0.02	0.21	0.02	0.33							4 altered motifs			2 hits	TNKS	intronic	rs35231275	8	9619909	TNKS	8	9762399	TNKS	3.311e-09	7
78	8	9762849	rs9657509	A	G	0.47	0.4	0.51	0.32							ATF3,HNF4			3 hits	TNKS	intronic	rs9657509	8	9620359	TNKS	8	9762849	TNKS	1.318e-16	7
79	8	9787149	rs2048656	G	A	0.51	0.44	0.54	0.36							GATA			2 hits	4.8kb 3' of TNKS		rs2048656	8	9644659	TNKS	8	9787149	TNKS	1.905e-15	7
80	8	9787466	rs2175846	G	T	0.53	0.44	0.54	0.35							Gmeb1			3 hits	5.1kb 3' of TNKS		rs2175846	8	9644976	TNKS	8	9787466	TNKS	8.128e-15	6
81	8	9788052	rs2048655	G	T	0.21	0.36	0.36	0.29							Pax-8			1 hit	5.7kb 3' of TNKS		rs2048655	8	9645562	TNKS	8	9788052	TNKS	4.786e-12	7
82	8	9788996	rs7837008	T	C	0.24	0.37	0.38	0.3				LIV			Foxa,Foxj2,Pax-8			1 hit	6.6kb 3' of TNKS		rs7837008	8	9646506	TNKS	8	9788996	TNKS	1.622e-12	7
83	8	9789050	rs7814507	G	A	0.24	0.37	0.38	0.3				LIV			GLI,RREB-1,Zec			1 hit	6.7kb 3' of TNKS		rs7814507	8	9646560	TNKS	8	9789050	TNKS	2.754e-12	7
84	8	9789075	rs34925256	A	AG	0.24	0.37	0.38	0.3				LIV			14 altered motifs			1 hit	6.7kb 3' of TNKS		rs34925256	8	9646585	TNKS	8	9789075	TNKS	4.365e-11
85	8	9789110	rs7814635	G	A	0.24	0.37	0.38	0.3				LIV			CDP,Irf,Sox			1 hit	6.8kb 3' of TNKS		rs7814635	8	9646620	TNKS	8	9789110	TNKS	1.862e-12	6
86	8	9789686	rs2014514	A	T	0.52	0.43	0.53	0.35				PANC, LIV			6 altered motifs			2 hits	7.3kb 3' of TNKS		rs2014514	8	9647196	TNKS	8	9789686	TNKS	1.622e-14	6
87	8	9790238	rs7820675	C	G	0.5	0.45	0.54	0.35				LIV			Myf,NF-E2,p300			2 hits	7.9kb 3' of TNKS		rs7820675	8	9647748	TNKS	8	9790238	TNKS	5.495e-15	7
88	8	9790286	rs7838571	A	G	0.52	0.45	0.54	0.35				LIV			HDAC2,MIF-1			3 hits	7.9kb 3' of TNKS		rs7838571	8	9647796	TNKS	8	9790286	TNKS	1.096e-14	6
89	8	9790358	rs7820917	C	T	0.52	0.45	0.54	0.35							RXRA		2 hits	2 hits	8kb 3' of TNKS		rs7820917	8	9647868	TNKS	8	9790358	TNKS	9.12e-15	6
90	8	9790807	rs7823885	G	T	0.18	0.36	0.36	0.28							Nr2e3			1 hit	8.5kb 3' of TNKS		rs7823885	8	9648317	TNKS	8	9790807	TNKS	1.862e-11	7
91	8	9791023	rs7824185	G	A	0.22	0.36	0.35	0.29							Hic1,Mxi1,SREBP			1 hit	8.7kb 3' of TNKS		rs7824185	8	9648533	TNKS	8	9791023	TNKS	2.188e-10	7
92	8	9791027	rs62489389	A	T	0.2	0.36	0.35	0.28							Hic1,Mxi1,SREBP			1 hit	8.7kb 3' of TNKS		rs62489389	8	9648537	TNKS	8	9791027	TNKS	2.089e-10	7
93	8	9791031	rs7825286	C	T	0.2	0.36	0.35	0.28							Hic1			1 hit	8.7kb 3' of TNKS		rs7825286	8	9648541	TNKS	8	9791031	TNKS	2.042e-10	7
94	8	9791636	rs13273565	T	C	0.21	0.36	0.37	0.29							AP-3,Barhl1,Isl2			1 hit	9.3kb 3' of TNKS		rs13273565	8	9649146	TNKS	8	9791636	TNKS	6.31e-12	6
95	8	9791655	rs12678014	T	C	0.52	0.45	0.55	0.35							8 altered motifs			2 hits	9.3kb 3' of TNKS		rs12678014	8	9649165	TNKS	8	9791655	TNKS	3.89e-15	6
96	8	9792181	rs7829463	G	C	0.37	0.41	0.53	0.34									2 hits	2 hits	9.8kb 3' of TNKS		rs7829463	8	9649691	TNKS	8	9792181	TNKS	1.047e-14	6
97	8	9792339	rs7829637	G	C	0.21	0.36	0.37	0.29							GCNF,Nr2f2			1 hit	10kb 3' of TNKS		rs7829637	8	9649849	TNKS	8	9792339	TNKS	1.122e-11	6
98	8	9792891	rs13249234	T	C	0.21	0.36	0.37	0.3				LIV			AP-1			1 hit	11kb 3' of TNKS		rs13249234	8	9650401	TNKS	8	9792891	TNKS	1.38e-11	7
99	8	9793586	rs34592740	G	C	0.24	0.37	0.38	0.3			ESDR	LIV			AP-1,HDAC2,KAP1			1 hit	11kb 3' of TNKS		rs34592740	8	9651096	TNKS	8	9793586	TNKS	6.607e-12	7
100	8	9793652	rs6980595	G	A	0.48	0.56	0.45	0.65			ESDR	LIV			GATA,Sox			2 hits	11kb 3' of TNKS		rs6980595	8	9651162	TNKS	8	9793652	TNKS	1.023e-14	5
101	8	9793763	rs13248108	G	C	0.24	0.37	0.38	0.3				LIV	GI,LIV	4 bound proteins				1 hit	11kb 3' of TNKS		rs13248108	8	9651273	TNKS	8	9793763	TNKS	5.248e-12	4
102	8	9794301	rs4840438	T	C	0.49	0.56	0.46	0.65				LIV			BCL			2 hits	12kb 3' of TNKS		rs4840438	8	9651811	TNKS	8	9794301	TNKS	6.166e-15	7
103	8	9794490	rs13259344	C	T	0.24	0.36	0.38	0.29				LIV			AIRE,Mef2			1 hit	12kb 3' of TNKS		rs13259344	8	9652000	TNKS	8	9794490	TNKS	4.571e-12	7
104	8	9794701	rs10103925	G	A	0.49	0.56	0.45	0.65							HNF1,Hoxa4,TCF12			2 hits	12kb 3' of TNKS		rs10103925	8	9652211	TNKS	8	9794701	TNKS	4.898e-15	7
105	8	9794748	rs7836375	A	G	0.38	0.41	0.54	0.35							AP-1,NF-E2			2 hits	12kb 3' of TNKS		rs7836375	8	9652258	TNKS	8	9794748	TNKS	1.905e-15	7
106	8	9795545	rs7844461	T	A	0.38	0.41	0.54	0.35							Barhl1,Maf			2 hits	13kb 3' of TNKS		rs7844461	8	9653055	TNKS	8	9795545	TNKS	2.399e-15	6
107	8	9795635	rs9286060	A	C	0.51	0.56	0.46	0.65							AIRE,Egr-1			2 hits	13kb 3' of TNKS		rs9286060	8	9653145	TNKS	8	9795635	TNKS	5.37e-15	6
108	8	9795777	rs10107992	G	A	0.49	0.56	0.46	0.65							NF-kappaB			2 hits	13kb 3' of TNKS		rs10107992	8	9653287	TNKS	8	9795777	TNKS	6.918e-15	6
109	8	9795992	rs13271796	A	C	0.24	0.36	0.38	0.3							11 altered motifs			1 hit	14kb 3' of TNKS		rs13271796	8	9653502	TNKS	8	9795992	TNKS	4.266e-12	6
110	8	9796187	rs35300296	C	T	0.21	0.36	0.37	0.29					BLD					1 hit	14kb 3' of TNKS		rs35300296	8	9653697	TNKS	8	9796187	TNKS	1.096e-11	7
111	8	9796392	rs4841218	T	C	0.48	0.56	0.46	0.65							4 altered motifs			2 hits	14kb 3' of TNKS		rs4841218	8	9653902	TNKS	8	9796392	TNKS	1.622e-14	6
112	8	9796675	rs4841219	A	C	0.51	0.59	0.47	0.65										2 hits	14kb 3' of TNKS		rs4841219	8	9654185	TNKS	8	9796675	TNKS	5.623e-15	7
113	8	9797247	rs7828039	G	C	0.48	0.54	0.45	0.65							4 altered motifs			2 hits	15kb 3' of TNKS		rs7828039	8	9654757	TNKS	8	9797247	TNKS	4.898e-15	7
114	8	9797708	rs10112972	T	A	0.48	0.55	0.46	0.65										2 hits	15kb 3' of TNKS		rs10112972	8	9655218	TNKS	8	9797708	TNKS	5.623e-15	6
115	8	9797848	rs10113155	T	C	0.49	0.55	0.46	0.65							IRC900814,TCF4			2 hits	16kb 3' of TNKS		rs10113155	8	9655358	TNKS	8	9797848	TNKS	6.31e-15	6
116	8	9797916	rs10113186	T	C	0.5	0.55	0.46	0.65							Pou2f2,Pou3f3			2 hits	16kb 3' of TNKS		rs10113186	8	9655426	TNKS	8	9797916	TNKS	6.761e-15	6
117	8	9798102	rs11249949	T	C	0.51	0.55	0.46	0.65							4 altered motifs			2 hits	16kb 3' of TNKS		rs11249949	8	9655612	TNKS	8	9798102	TNKS	7.943e-15	6
118	8	9798313	rs12543346	C	G	0.48	0.54	0.46	0.65							Pou2f2,Zfp187			2 hits	16kb 3' of TNKS		rs12543346	8	9655823	TNKS	8	9798313	TNKS	3.09e-15	6
119	8	9798405	rs12543369	C	A	0.48	0.54	0.46	0.64							4 altered motifs			2 hits	16kb 3' of TNKS		rs12543369	8	9655915	TNKS	8	9798405	TNKS	9.772e-15	7
120	8	9798406	rs12546411	T	A	0.48	0.54	0.46	0.65							GATA,ZEB1			2 hits	16kb 3' of TNKS		rs12546411	8	9655916	TNKS	8	9798406	TNKS	9.333e-15	7
121	8	9798549	rs4841220	T	G	0.51	0.54	0.46	0.65							7 altered motifs			2 hits	16kb 3' of TNKS		rs4841220	8	9656059	TNKS	8	9798549	TNKS	3.802e-15	6
122	8	9798792	rs4841222	C	T	0.49	0.55	0.45	0.65							Pax-4,TCF12			2 hits	16kb 3' of TNKS		rs4841222	8	9656302	TNKS	8	9798792	TNKS	2.754e-13	7
123	8	9800684	rs11249956	G	C	0.48	0.54	0.47	0.65							Nanog,RXRA			2 hits	18kb 3' of TNKS		rs11249956	8	9658194	TNKS	8	9800684	TNKS	1.585e-14	6
124	8	9801836	rs9987266	T	C	0.48	0.55	0.46	0.66				IPSC			Nkx6-2			3 hits	19kb 3' of TNKS		rs9987266	8	9659346	TNKS	8	9801836	TNKS	4.266e-15	7
125	8	9802425	rs13259398	T	A	0.47	0.54	0.46	0.66				LIV	PLCNT,CRVX	KAP1,P300,SETDB1	HNF4,Myf,RP58			2 hits	20kb 3' of TNKS		rs13259398	8	9659935	TNKS	8	9802425	TNKS	6.31e-15	5
126	8	9802688	rs34062996	G	A	0.48	0.54	0.46	0.63				LIV						2 hits	20kb 3' of TNKS		rs34062996	8	9660198	TNKS	8	9802688	TNKS	2.291e-14	6
127	8	9803025	rs35253821	A	G	0.78	0.62	0.63	0.72				LIV			AP-2,TAL1,YY1			1 hit	21kb 3' of TNKS		rs35253821	8	9660535	TNKS	8	9803025	TNKS	5.495e-12	7
128	8	9803111	rs35431433	C	T	0.49	0.54	0.46	0.65							Rad21			2 hits	21kb 3' of TNKS		rs35431433	8	9660621	TNKS	8	9803111	TNKS	3.311e-15	7
129	8	9803692	rs56225255	G	A	0.49	0.55	0.46	0.65							15 altered motifs			3 hits	21kb 3' of TNKS		rs56225255	8	9661202	TNKS	8	9803692	TNKS	1.479e-14	7
130	8	9803757	rs34746821	G	A	0.48	0.55	0.47	0.66							LUN-1,Pax-5,Pitx2			3 hits	21kb 3' of TNKS		rs34746821	8	9661267	TNKS	8	9803757	TNKS	9.772e-15	6
131	8	9805943	rs28828176	A	C	0.43	0.57	0.46	0.66							Egr-1			3 hits	24kb 3' of TNKS		rs28828176	8	9663453	TNKS	8	9805943	TNKS	1.66e-15	7
132	8	9806120	rs34782826	G	T	0.43	0.54	0.47	0.66							AP-2rep,Roaz,Zfp740			3 hits	24kb 3' of TNKS		rs34782826	8	9663630	TNKS	8	9806120	TNKS	1.148e-15	7
133	8	9806241	rs35607831	G	C	0.43	0.54	0.47	0.66							HDAC2,p300			3 hits	24kb 3' of TNKS		rs35607831	8	9663751	TNKS	8	9806241	TNKS	3.802e-15	7
134	8	9807564	rs13249447	A	C	0.43	0.56	0.48	0.65							5 altered motifs			3 hits	25kb 3' of TNKS		rs13249447	8	9665074	TNKS	8	9807564	TNKS	4.898e-15	7
135	8	9808445	rs7821575	G	C	0.43	0.57	0.48	0.65							Mef2			3 hits	26kb 3' of TNKS		rs7821575	8	9665955	TNKS	8	9808445	TNKS	1.585e-14	6
136	8	9809717	rs35293371	C	T	0.43	0.57	0.47	0.65							AIRE,Pou2f2,Pou3f2			3 hits	27kb 3' of TNKS		rs35293371	8	9667227	TNKS	8	9809717	TNKS	2.512e-15	7
137	8	9810404	rs13275545	G	C	0.44	0.57	0.48	0.65							Brachyury,GR,HNF4			3 hits	28kb 3' of TNKS		rs13275545	8	9667914	TNKS	8	9810404	TNKS	1.995e-15	7
138	8	9811654	rs4841225	T	A	0.42	0.57	0.48	0.66							Ets,RXRA			3 hits	29kb 3' of TNKS		rs4841225	8	9669164	TNKS	8	9811654	TNKS	1.82e-15	7
139	8	9811825	rs28634186	T	C	0.54	0.6	0.48	0.66							Myb			2 hits	29kb 3' of TNKS		rs28634186	8	9669335	TNKS	8	9811825	TNKS	3.802e-16	7
140	8	9812265	rs10104807	G	A	0.47	0.58	0.48	0.65							ZBTB7A			2 hits	30kb 3' of TNKS		rs10104807	8	9669775	TNKS	8	9812265	TNKS	3.802e-16	4
141	8	9812375	rs10095171	T	C	0.5	0.58	0.48	0.65							NF-Y			2 hits	30kb 3' of TNKS		rs10095171	8	9669885	TNKS	8	9812375	TNKS	7.079e-16	4
142	8	9815642	rs10107396	T	C	0.49	0.58	0.49	0.65							PLZF			2 hits	33kb 3' of TNKS		rs10107396	8	9673152	TNKS	8	9815642	TNKS	4.169e-18	7
143	8	9816671	rs10093915	C	A	0.53	0.59	0.48	0.64							GLI,SRF,p300			3 hits	34kb 3' of TNKS		rs10093915	8	9674181	TNKS	8	9816671	TNKS	1.585e-18	6
144	8	9818954	rs138391493	T	G	0.25	0.57	0.48	0.65						TCF4	4 altered motifs				37kb 3' of TNKS		rs138391493	8	9676464	TNKS				5.495e-18
145	8	9819026	rs7386132	G	A	0.55	0.6	0.48	0.65							CTCF,Nrf1			2 hits	37kb 3' of TNKS		rs7386132	8	9676536	TNKS	8	9819026	TNKS	1.318e-18	7
146	8	9820288	rs4840441	A	G	0.48	0.54	0.47	0.62							Hic1,Nanog			2 hits	38kb 3' of TNKS		rs4840441	8	9677798	TNKS	8	9820288	TNKS	1.585e-17	7
147	8	9820519	rs4841229	C	A	0.56	0.58	0.48	0.63							NF-kappaB			2 hits	38kb 3' of TNKS		rs4841229	8	9678029	TNKS	8	9820519	TNKS	7.586e-18	6
148	8	9821208	rs77213765	G	A	0.25	0.35	0.36	0.31							Myc,Tel2			1 hit	39kb 3' of TNKS		rs77213765	8	9678718	TNKS	8	9821208	TNKS	2.089e-14	7
149	8	9821415	rs4840442	T	C	0.25	0.36	0.36	0.31							CIZ,PLZF			1 hit	39kb 3' of TNKS		rs4840442	8	9678925	TNKS	8	9821415	TNKS	1.259e-14	7
150	8	9821438	rs4841230	C	T	0.25	0.36	0.36	0.31							Foxd3,Foxj1			1 hit	39kb 3' of TNKS		rs4841230	8	9678948	TNKS	8	9821438	TNKS	1.66e-14	6
151	8	9822124	rs1976671	A	G	0.42	0.41	0.53	0.36							21 altered motifs			2 hits	40kb 3' of TNKS		rs1976671	8	9679634	TNKS	8	9822124	TNKS	7.244e-18	6
152	8	9822182	rs1976672	G	T	0.25	0.36	0.36	0.31							Nr2f2,Pax-4,VDR			1 hit	40kb 3' of TNKS		rs1976672	8	9679692	TNKS	8	9822182	TNKS	1.514e-14	6
153	8	9822232	rs7000322	C	T	0.5	0.56	0.47	0.64							GR,SIX5			2 hits	40kb 3' of TNKS		rs7000322	8	9679742	TNKS	8	9822232	TNKS	5.495e-19	7
154	8	9822270	rs1976673	T	A	0.25	0.36	0.36	0.31							8 altered motifs			1 hit	40kb 3' of TNKS		rs1976673	8	9679780	TNKS	8	9822270	TNKS	1.047e-14	7
155	8	9822713	rs17734290	T	G	0.25	0.36	0.36	0.31				BLD	BLD		TCF4		2 hits	2 hits	40kb 3' of TNKS		rs17734290	8	9680223	TNKS	8	9822713	TNKS	2.818e-14	1f
156	8	9822890	rs55868514	T	C	0.49	0.57	0.48	0.64				BLD			NRSF			2 hits	41kb 3' of TNKS		rs55868514	8	9680400	TNKS	8	9822890	TNKS	4.074e-19	7
157	8	9823468	rs2090061	C	T	0.57	0.58	0.47	0.6							8 altered motifs			1 hit	41kb 3' of TNKS		rs2090061	8	9680978	TNKS	8	9823468	TNKS	1.862e-14	5
158	8	9932183	rs13282752	A	G	0.02	0.22	0	0.36				ESC			TCF4,VDR			3 hits	359bp 5' of snoU13		rs13282752	8	9789693	MIR124-1	8	9932183	MIR124-1	1.995e-12	7
159	8	9936091	rs483916	A	C	0.6	0.42	0.03	0.56							NF-I,STAT			5 hits	4.3kb 5' of snoU13		rs483916	8	9793601	MIR124-1	8	9936091	MIR124-1	3.311e-20	7
160	8	9938811	rs615632	C	T	0.72	0.42	0.04	0.56							CCNT2,TAL1			3 hits	7kb 5' of snoU13		rs615632	8	9796321	MIR124-1	8	9938811	MIR124-1	2.344e-20	5
161	8	9946202	rs13271489	T	C	0.15	0.38	0.04	0.55				BRN			4 altered motifs			2 hits	14kb 5' of snoU13		rs13271489	8	9803712	MIR124-1	8	9946202	LOC105379235	1.549e-30	7
162	8	9946565	rs13264066	C	G	0.23	0.39	0.04	0.56							9 altered motifs			2 hits	15kb 5' of snoU13		rs13264066	8	9804075	MIR124-1	8	9946565	LOC105379235	7.586e-32	6
163	8	9946675	rs10092464	C	G	0.28	0.46	0.88	0.33									2 hits	2 hits	15kb 5' of snoU13		rs10092464	8	9804185	MIR124-1	8	9946675	LOC105379235	7.586e-12	6
164	8	9946782	rs9650622	G	T	0.23	0.39	0.04	0.56							AP-1,RXRA,SF1			2 hits	15kb 5' of snoU13		rs9650622	8	9804292	MIR124-1	8	9946782	LOC105379235	3.236e-34	7
165	8	9948185	rs56243511	T	C	0.27	0.4	0.04	0.56							6 altered motifs			2 hits	16kb 5' of snoU13		rs56243511	8	9805695	MIR124-1				1.514e-29	6
166	8	9948982	rs58689676	T	C	0.27	0.4	0.04	0.56										2 hits	17kb 5' of snoU13		rs58689676	8	9806492	MIR124-1				1.445e-29	7
167	8	9949314	rs55975067	C	G	0.27	0.39	0.04	0.56							p53			2 hits	17kb 5' of snoU13		rs55975067	8	9806824	MIR124-1				6.607e-27	7
168	8	9949512	rs55864141	T	C	0.27	0.39	0.04	0.55							4 altered motifs			2 hits	18kb 5' of snoU13		rs55864141	8	9807022	MIR124-1	8	9949512	LOC105379235	2.951e-27	7
169	8	9955459	rs522483	C	G	0.39	0.51	0.05	0.59							Gfi1,Gfi1b			3 hits	24kb 5' of snoU13		rs522483	8	9812969	MIR124-1	8	9955459	LOC105379235	1.479e-30	5
170	8	9956901	rs656319	A	G	0.49	0.51	0.05	0.59							Irx	1 hit	2 hits	4 hits	25kb 5' of snoU13		rs656319	8	9814411	MIR124-1	8	9956901	LOC105379235	1.514e-19	6
171	8	9959065	rs199679450	AAG	A	0.83	0.57	0.12	0.61							6 altered motifs			3 hits	27kb 5' of snoU13		rs199679450	8	9816576	MIR124-1	8	9959066	LOC105379235	9.12e-13
172	8	9960555	rs591346	C	T	0.49	0.42	0.05	0.53					IPSC		Ets,STAT			6 hits	29kb 5' of snoU13		rs591346	8	9818065	MIR124-1	8	9960555	LOC105379235	3.802e-23	5
173	8	10025065	rs657913	G	T	0.42	0.39	0.05	0.58											25kb 3' of RP11-1E4.1		rs657913	8	9882575	MSRA	8	10025065	LOC105379235	3.467e-25	7
174	8	10025257	rs560638	A	G	0.44	0.39	0.05	0.58											25kb 3' of RP11-1E4.1		rs560638	8	9882767	MSRA	8	10025257	LOC105379235	9.772e-30	7
175	8	10025622	rs814359	T	G	0.43	0.39	0.05	0.58											25kb 3' of RP11-1E4.1		rs814359	8	9883132	MSRA	8	10025622	LOC105379235	1.122e-22	7
176	8	10027313	rs688491	C	G	0.44	0.4	0.05	0.58					SKIN,SKIN	STAT3	Myc				23kb 3' of RP11-1E4.1		rs688491	8	9884823	MSRA	8	10027313	LOC105379235	6.918e-27	4
177	8	10027489	rs534523	C	G	0.44	0.39	0.05	0.56							Obox6		4 hits		23kb 3' of RP11-1E4.1		rs534523	8	9884999	MSRA	8	10027489	LOC105379235	3.89e-20	6
178	8	10030287	rs525726	G	C	0.43	0.39	0.05	0.58							TFII-I				20kb 3' of RP11-1E4.1		rs525726	8	9887797	MSRA	8	10030287	LOC105379235	3.02e-32	7
179	8	10031219	rs555200	A	G	0.48	0.4	0.05	0.58							RORalpha1				19kb 3' of RP11-1E4.1		rs555200	8	9888729	MSRA	8	10031219	LOC105379235	4.074e-32	7
180	8	10032404	rs3105738	A	T	0.42	0.4	0.05	0.58							CIZ,Mef2,RFX5		2 hits		18kb 3' of RP11-1E4.1		rs3105738	8	9889914	MSRA	8	10032404	LOC105379235	3.715e-29	6
181	8	10032794	rs4598253	A	T	0.43	0.4	0.06	0.58							AIRE,Cdx,Sox				18kb 3' of RP11-1E4.1		rs4598253	8	9890304	MSRA	8	10032794	LOC105379235	5.888e-28	6
182	8	10033744	rs643955	T	G	0.45	0.4	0.05	0.58							4 altered motifs				17kb 3' of RP11-1E4.1		rs643955	8	9891254	MSRA	8	10033744	LOC105379235	2.63e-39	6
183	8	10034667	rs658385	C	T	0.45	0.39	0.04	0.58							Cart1,TCF11::MafG				16kb 3' of RP11-1E4.1		rs658385	8	9892177	MSRA	8	10034667	LOC105379235	1.622e-25	7
184	8	10109076	rs1994224	A	G	0.15	0.25	0.4	0.18				8 tissues	7 tissues		PRDM1,Zfp161				MSRA	intronic	rs1994224	8	9966586	MSRA	8	10109076	MSRA	2.188e-09	5
185	8	10110758	rs1484638	G	A	0.07	0.25	0.38	0.18				BLD			GATA,GR				MSRA	intronic	rs1484638	8	9968268	MSRA	8	10110758	MSRA	6.607e-09	7
186	8	10113609	rs17151108	G	A	0.11	0.28	0.39	0.22							Hoxb8		1 hit		MSRA	intronic	rs17151108	8	9971119	MSRA	8	10113609	MSRA	3.388e-09	6
187	8	10116208	rs34748716	C	T	0.19	0.33	0	0.44							Ets,Myb			5 hits	MSRA	intronic	rs34748716	8	9973718	MSRA	8	10116208	MSRA	1.175e-11	7
188	8	10117074	rs60384372	A	G	0.42	0.38	0.02	0.51							Myc			10 hits	MSRA	intronic	rs60384372	8	9974584	MSRA	8	10117074	MSRA	1.549e-14	7
189	8	10117314	rs17689007	G	A	0.38	0.38	0.02	0.5							Pou1f1			6 hits	MSRA	intronic	rs17689007	8	9974824	MSRA	8	10117314	MSRA	1.413e-14	7
190	8	10117348	rs17689037	C	T	0.39	0.38	0.02	0.5							Zec		2 hits	7 hits	MSRA	intronic	rs17689037	8	9974858	MSRA	8	10117348	MSRA	7.762e-14	6
191	8	10118094	rs4841282	C	A	0.38	0.58	0.95	0.42				BLD, ADRL	BRN		4 altered motifs			6 hits	MSRA	intronic	rs4841282	8	9975604	MSRA	8	10118094	MSRA	3.02e-18	5
192	8	10118165	rs6995837	T	C	0.43	0.59	0.95	0.43				BLD, ADRL	BRN		RBP-Jkappa			5 hits	MSRA	intronic	rs6995837	8	9975675	MSRA	8	10118165	MSRA	1e-17	7
193	8	10118199	rs6995859	T	A	0.43	0.59	0.95	0.43				BLD, ADRL	BLD,BRN		CEBPA,STAT			5 hits	MSRA	intronic	rs6995859	8	9975709	MSRA	8	10118199	MSRA	9.12e-18	7
194	8	10118969	rs55683917	C	G	0.36	0.36	0.02	0.49					OVRY		RXRA			10 hits	MSRA	intronic	rs55683917	8	9976479	MSRA	8	10118969	MSRA	1.288e-14	7
195	8	10119030	rs7843924	C	T	0.43	0.59	0.95	0.42							13 altered motifs			6 hits	MSRA	intronic	rs7843924	8	9976540	MSRA	8	10119030	MSRA	1.905e-18	6
196	8	10119238	rs6601414	G	A	0.39	0.58	0.95	0.42							Arid5a,Cdx2		3 hits	6 hits	MSRA	intronic	rs6601414	8	9976748	MSRA	8	10119238	MSRA	5.248e-18	6
197	8	10119295	rs6601415	C	A	0.38	0.58	0.95	0.42							Foxp3,Smad3,Smad			5 hits	MSRA	intronic	rs6601415	8	9976805	MSRA	8	10119295	MSRA	1.288e-18	7
198	8	10120408	rs6983332	C	T	0.43	0.59	0.95	0.42							Hand1,Smad3		3 hits	8 hits	MSRA	intronic	rs6983332	8	9977918	MSRA	8	10120408	MSRA	5.623e-18	6
199	8	10120470	rs17689289	C	G	0.36	0.36	0.02	0.49					BRN		7 altered motifs		2 hits	10 hits	MSRA	intronic	rs17689289	8	9977980	MSRA	8	10120470	MSRA	2.239e-14	6
200	8	10120961	rs6986885	G	A	0.43	0.59	0.95	0.45							22 altered motifs			5 hits	MSRA	intronic	rs6986885	8	9978471	MSRA	8	10120961	MSRA	5.888e-14	6
201	8	10121013	rs6986911	G	A	0.43	0.59	0.95	0.42							5 altered motifs			5 hits	MSRA	intronic	rs6986911	8	9978523	MSRA	8	10121013	MSRA	1.778e-18	6
202	8	10121262	rs13254175	C	T	0.43	0.59	0.95	0.42					BRN		ATF3,NRSF		2 hits	6 hits	MSRA	intronic	rs13254175	8	9978772	MSRA	8	10121262	MSRA	2.042e-18	6
203	8	10121409	rs12678797	G	A	0.43	0.59	0.95	0.42					SKIN		BATF,Irf,ZBRK1		2 hits	6 hits	MSRA	intronic	rs12678797	8	9978919	MSRA	8	10121409	MSRA	1.549e-18	6
204	8	10121430	rs12678800	G	A	0.43	0.59	0.95	0.42					SKIN					6 hits	MSRA	intronic	rs12678800	8	9978940	MSRA	8	10121430	MSRA	1.479e-18	7
205	8	10121875	rs13264586	T	C	0.42	0.58	0.95	0.42							Sox			5 hits	MSRA	intronic	rs13264586	8	9979385	MSRA	8	10121875	MSRA	2.399e-17	6
206	8	10122482	rs2062331	A	G	0.46	0.59	0.95	0.42							Nkx2,Nkx3,TEF-1		2 hits	5 hits	MSRA	intronic	rs2062331	8	9979992	MSRA	8	10122482	MSRA	1.202e-18	6
207	8	10122514	rs2062332	G	A	0.44	0.59	0.95	0.42							5 altered motifs			5 hits	MSRA	intronic	rs2062332	8	9980024	MSRA	8	10122514	MSRA	1.349e-18	7
208	8	10123639	rs2062333	A	G	0.54	0.61	0.97	0.44							6 altered motifs			4 hits	MSRA	intronic	rs2062333	8	9981149	MSRA	8	10123639	MSRA	4.266e-14	6
209	8	10124144	rs17746227	T	C	0.19	0.34	0	0.45				BLD			Nanog			6 hits	MSRA	intronic	rs17746227	8	9981654	MSRA	8	10124144	MSRA	1.514e-12	7
210	8	10124176	rs17746245	G	T	0.18	0.34	0	0.46				BLD			EBF,NF-kappaB,SRF		1 hit	5 hits	MSRA	intronic	rs17746245	8	9981686	MSRA	8	10124176	MSRA	1.047e-11	7
211	8	10124344	rs17689674	C	A	0.53	0.59	0.97	0.41				BLD			EBF,Ik-2,LUN-1			6 hits	MSRA	intronic	rs17689674	8	9981854	MSRA	8	10124344	MSRA	1.288e-18	6
212	8	10124390	rs13282106	G	T	0.54	0.6	0.97	0.42				BLD						5 hits	MSRA	intronic	rs13282106	8	9981900	MSRA	8	10124390	MSRA	3.09e-18	7
213	8	10125443	rs13259465	C	G	0.16	0.34	0	0.46				ESDR			ERalpha-a,NF-kappaB			6 hits	MSRA	intronic	rs13259465	8	9982953	MSRA	8	10125443	MSRA	2.188e-12	7
214	8	10125669	rs6985941	C	T	0.18	0.33	0	0.46					IPSC	CEBPB	NRSF			6 hits	MSRA	intronic	rs6985941	8	9983179	MSRA	8	10125669	MSRA	3.236e-13	5
215	8	10125714	rs1484639	T	G	0.49	0.6	0.97	0.42						CEBPB	6 altered motifs			6 hits	MSRA	intronic	rs1484639	8	9983224	MSRA	8	10125714	MSRA	1.698e-19	5
216	8	10125733	rs1484640	G	T	0.48	0.6	0.97	0.41						CEBPB	Nkx2,Sox			6 hits	MSRA	intronic	rs1484640	8	9983243	MSRA	8	10125733	MSRA	3.802e-19	5
217	8	10127267	rs1351876	G	A	0.38	0.59	0.95	0.42						MAFK	7 altered motifs		2 hits	5 hits	MSRA	intronic	rs1351876	8	9984777	MSRA	8	10127267	MSRA	5.495e-18	1f
218	8	10129014	rs1484641	C	A	0.2	0.34	0	0.46				LNG, SKIN	BLD		HP1-site-factor,Nkx2,RBP-Jkappa		2 hits	6 hits	MSRA	intronic	rs1484641	8	9986524	MSRA	8	10129014	MSRA	2.57e-12	7
219	8	10134151	rs3885723	A	C	0.62	0.36	0.02	0.48				8 tissues			5 altered motifs		1 hit	8 hits	MSRA	intronic	rs3885723	8	9991661	MSRA	8	10134151	MSRA	3.09e-11	5
220	8	10138879	rs34990153	A	G	0.2	0.35	0	0.48			FAT, LIV, BRN	15 tissues	13 tissues		Ascl2,Mef2,NRSF			8 hits	MSRA	intronic	rs34990153	8	9996389	MSRA	8	10138879	MSRA	7.943e-14	5
221	8	10151506	rs28630503	C	T	0.3	0.42	0.46	0.27				14 tissues						6 hits	MSRA	intronic	rs28630503	8	10009016	MSRA	8	10151506	MSRA	3.802e-11	7
222	8	10152439	rs11986122	C	G	0.33	0.58	0.96	0.39				17 tissues	47 tissues	13 bound proteins	Foxf1			16 hits	MSRA	intronic	rs11986122	8	10009949	MSRA	8	10152439	MSRA	1.778e-19	4
223	8	10152442	rs11993089	G	T	0.32	0.58	0.96	0.39				17 tissues	47 tissues	13 bound proteins	ERalpha-a,ZBTB33			16 hits	MSRA	intronic	rs11993089	8	10009952	MSRA	8	10152442	MSRA	6.166e-23	4
224	8	10154722	rs62488738	C	G	0.17	0.37	0.45	0.27							DMRT1,DMRT4,Sox			7 hits	MSRA	intronic	rs62488738	8	10012232	MSRA	8	10154722	MSRA	7.079e-11	6
225	8	10219731	rs7017349	G	A	0.83	0.68	0.99	0.54				BRN			Rad21,SMC3			9 hits	MSRA	intronic	rs7017349	8	10077241	MSRA	8	10219731	MSRA	5.248e-18	7
226	8	10222127	rs4840467	A	G	0.84	0.7	1	0.57							YY1			10 hits	MSRA	intronic	rs4840467	8	10079637	MSRA	8	10222127	MSRA	3.02e-13	7
227	8	10240012	rs12156030	C	G	0.05	0.31	0	0.44				SKIN	5 tissues		9 altered motifs			11 hits	MSRA	intronic	rs12156030	8	10097522	MSRA	8	10240012	MSRA	1.66e-17	5
228	8	10240720	rs13263482	G	A	0.05	0.31	0	0.43							Ik-1			9 hits	MSRA	intronic	rs13263482	8	10098230	MSRA	8	10240720	MSRA	1.23e-18	7
229	8	10240837	rs13263803	G	A	0.05	0.31	0	0.44							22 altered motifs			9 hits	MSRA	intronic	rs13263803	8	10098347	MSRA	8	10240837	MSRA	5.495e-19	6
230	8	10241392	rs12156387	A	G	0.05	0.3	0	0.43							GCM,Hbp1,Rad21			10 hits	MSRA	intronic	rs12156387	8	10098902	MSRA	8	10241392	MSRA	1.66e-17	7
231	8	10241994	rs34919878	G	A	0.05	0.3	0	0.43							6 altered motifs			8 hits	MSRA	intronic	rs34919878	8	10099504	MSRA	8	10241994	MSRA	5.248e-19	6
232	8	10242092	rs34487797	C	T	0.05	0.3	0	0.43							4 altered motifs			9 hits	MSRA	intronic	rs34487797	8	10099602	MSRA	8	10242092	MSRA	1.479e-18	6
233	8	10242560	rs55836143	G	T	0.1	0.31	0.03	0.44							8 altered motifs			11 hits	MSRA	intronic	rs55836143	8	10100070	MSRA	8	10242560	MSRA	1.072e-17	6
234	8	10243014	rs2272597	A	C	0.35	0.34	0.03	0.47							13 altered motifs			11 hits	MSRA	intronic	rs2272597	8	10100524	MSRA	8	10243014	MSRA	2.63e-17	5
235	8	10243259	rs2272598	T	C	0.31	0.33	0.03	0.47					KID		RXRA,Rad21			10 hits	MSRA	intronic	rs2272598	8	10100769	MSRA	8	10243259	MSRA	5.129e-17	6
236	8	10243402	rs17750324	G	A	0.27	0.33	0	0.46							Foxp1,Sox,TCF4			8 hits	MSRA	intronic	rs17750324	8	10100912	MSRA	8	10243402	MSRA	2.399e-17	6
237	8	10245669	rs2952225	G	C	0.37	0.39	0.17	0.53							10 altered motifs			5 hits	MSRA	intronic	rs2952225	8	10103179	MSRA	8	10245669	MSRA	2.692e-11	5
238	8	10247558	rs4841294	C	A	0.23	0.32	0	0.45				BRN, VAS	BRN		4 altered motifs		2 hits	10 hits	MSRA	intronic	rs4841294	8	10105068	MSRA	8	10247558	MSRA	2.57e-17	1f
239	8	10247605	rs4841295	T	C	0.21	0.32	0	0.46				BRN, VAS	BRN,GI		Irf		1 hit	8 hits	MSRA	intronic	rs4841295	8	10105115	MSRA	8	10247605	MSRA	3.981e-16	1f
240	8	10248500	rs17693945	C	T	0.14	0.31	0	0.44				BRN, GI	6 tissues					10 hits	MSRA	intronic	rs17693945	8	10106010	MSRA	8	10248500	MSRA	1.514e-18	5
241	8	10256948	rs17694485	T	A	0.03	0.3	0	0.43							9 altered motifs		2 hits	9 hits	MSRA	intronic	rs17694485	8	10114458	MSRA	8	10256948	MSRA	1e-17	6
242	8	10257492	rs13258409	C	T	0.07	0.31	0	0.42							17 altered motifs			10 hits	MSRA	intronic	rs13258409	8	10115002	MSRA	8	10257492	MSRA	9.55e-19	6
243	8	10259220	rs17751178	C	T	0.08	0.31	0	0.44				GI					2 hits	7 hits	MSRA	intronic	rs17751178	8	10116730	MSRA	8	10259220	MSRA	2.63e-18	6
244	8	10259901	rs11776973	C	T	0.07	0.31	0	0.43				ESDR, GI			4 altered motifs		1 hit	10 hits	MSRA	intronic	rs11776973	8	10117411	MSRA	8	10259901	MSRA	1.318e-17	6
245	8	10298515	rs6601427	T	C	0.61	0.42	0.01	0.57					BLD				3 hits	14 hits	MSRA	intronic	rs6601427	8	10156025	MSRA	8	10298515	MSRA	2.884e-108	6
246	8	10328625	rs4841317	C	T	0.34	0.59	0.99	0.43				BLD			Pou2f2			16 hits	MSRA	intronic	rs4841317	8	10186135	MSRA	8	10328625	MSRA	8.318e-176	7
247	8	10330482	rs7837316	G	A	0.2	0.32	0.39	0.32				BLD, BRN			Zfp410			5 hits	MSRA	intronic	rs7837316	8	10187992	MSRA	8	10330482	MSRA	1.122e-14	7
248	8	10331107	rs13249929	G	A	0.16	0.32	0.39	0.32				5 tissues	4 tissues				2 hits	10 hits	MSRA	intronic	rs13249929	8	10188617	MSRA	8	10331107	MSRA	7.943e-14	6
249	8	10332530	rs7832708	C	T	0.33	0.59	0.99	0.46			BLD, SKIN	8 tissues	BLD		Hoxa3		12 hits	18 hits	MSRA	intronic	rs7832708	8	10190040	MSRA	8	10332530	MSRA	6.918e-27	1f
250	8	10333225	rs35130171	A	G	0.19	0.33	0.43	0.34			4 tissues	18 tissues	9 tissues		Foxo,Nkx2,Rad21			9 hits	MSRA	intronic	rs35130171	8	10190735	MSRA	8	10333225	MSRA	6.026e-15	5
251	8	10336262	rs6982308	C	G	0.45	0.4	0.04	0.55			IPSC	5 tissues	BRN		HMG-IY,RBP-Jkappa			24 hits	MSRA	intronic	rs6982308	8	10193772	MSRA	8	10336262	MSRA	7.244e-24	6
252	8	10362902	rs11249992	C	A	0.11	0.35	0.22	0.34				16 tissues	BLD,LNG,SKIN		9 altered motifs			10 hits	MSRA	intronic	rs11249992	8	10220412	MSRA	8	10362902	MSRA	1.514e-18	5
253	8	10368845	rs3088186	C	T	0.15	0.29	0.23	0.28				7 tissues	5 tissues		5 altered motifs		1 hit	7 hits	MSRA	intronic	rs3088186	8	10226355	MSRA	8	10368845	MSRA	2.042e-16	5
254	8	10381412	rs11249995	T	C	0.09	0.32	0.26	0.33							5 altered motifs		1 hit	15 hits	MSRA	intronic	rs11249995	8	10238922	MSRA	8	10381412	MSRA	3.631e-19	6
255	8	10382297	rs35840352	A	G	0.14	0.33	0.26	0.33				4 tissues			5 altered motifs			15 hits	MSRA	intronic	rs35840352	8	10239807	MSRA	8	10382297	MSRA	1.413e-19	5
256	8	10386275	rs34381075	C	G	0.14	0.31	0.23	0.33							Brachyury,TBX5			11 hits	MSRA	intronic	rs34381075	8	10243785	MSRA	8	10386275	MSRA	3.715e-19	5
257	8	10386293	rs34487437	G	A	0.14	0.31	0.23	0.33							5 altered motifs			10 hits	MSRA	intronic	rs34487437	8	10243803	MSRA	8	10386293	MSRA	1.479e-18	5
258	8	10387083	rs35406700	A	G	0.2	0.32	0.26	0.33				4 tissues	4 tissues		10 altered motifs			10 hits	MSRA	intronic	rs35406700	8	10244593	MSRA	8	10387083	MSRA	1.549e-18	5
259	8	10387953	rs11249996	A	C	0.15	0.31	0.26	0.32				IPSC			KAP1,Mef2,SP1		5 hits	12 hits	MSRA	intronic	rs11249996	8	10245463	MSRA	8	10387953	MSRA	1.318e-18	6
260	8	10389159	rs35472251	A	G	0.08	0.31	0.26	0.32				MUS			NRSF,TATA,YY1			12 hits	MSRA	intronic	rs35472251	8	10246669	MSRA	8	10389159	MSRA	3.89e-18	7
261	8	10390019	rs34155841	T	G	0.14	0.31	0.25	0.33				7 tissues			SREBP,STAT			10 hits	MSRA	intronic	rs34155841	8	10247529	MSRA	8	10390019	MSRA	3.548e-18	5
262	8	10398391	rs11250001	G	A	0.82	0.68	0.78	0.66				6 tissues	8 tissues	CTCF	NF-I,TLX1::NFIC			11 hits	MSRA	intronic	rs11250001	8	10255901	MSRA	8	10398391	MSRA	1.413e-17	4
263	8	10399531	rs11250002	T	G	0.16	0.3	0.23	0.34			MUS	4 tissues			AP-2,TLX1::NFIC			12 hits	MSRA	intronic	rs11250002	8	10257041	MSRA	8	10399531	MSRA	2.138e-18	7
264	8	10403327	rs12547997	A	G	0.12	0.31	0.28	0.34				BRN, MUS	BRN,BRN,HRT		CIZ		1 hit	11 hits	MSRA	intronic	rs12547997	8	10260837	MSRA	8	10403327	MSRA	4.677e-17	5
265	8	10403411	rs12548025	A	T	0.08	0.31	0.24	0.33				BRN, MUS						13 hits	MSRA	intronic	rs12548025	8	10260921	MSRA	8	10403411	MSRA	6.918e-17	7
266	8	10406750	rs11786677	A	G	0.43	0.52	0.75	0.39							5 altered motifs			13 hits	MSRA	intronic	rs11786677	8	10264260	MSRA	8	10406750	MSRA	5.623e-49	2b
267	8	10410030	rs9650651	C	A	0.6	0.53	0.71	0.37				4 tissues			7 altered motifs			14 hits	MSRA	intronic	rs9650651	8	10267540	MSRA	8	10410030	MSRA	8.128e-18	6
268	8	10422718	rs7831557	G	A	0.23	0.37	0.03	0.54							BHLHE40,Tgif1		3 hits	27 hits	MSRA	intronic	rs7831557	8	10280228	MSRA	8	10422718	MSRA	3.548e-18	6
269	8	10425916	rs3750310	G	A	0.23	0.36	0.03	0.53			BRN, GI	11 tissues	5 tissues		HDAC2,Ik-3,TEF-1			26 hits	MSRA	intronic	rs3750310	8	10283426	MSRA	8	10425916	MSRA	2.512e-18	5
270	8	10426092	rs3750311	C	A	0.2	0.35	0.03	0.53			GI, BRN, MUS	10 tissues	7 tissues					24 hits	MSRA	intronic	rs3750311	8	10283602	MSRA	8	10426092	MSRA	3.388e-18	5
271	8	10426238	rs7005363	T	C	0.52	0.43	0.5	0.43			GI, BRN, MUS	10 tissues	11 tissues		Maf,NRSF		4 hits	23 hits	MSRA	intronic	rs7005363	8	10283748	MSRA	8	10426238	MSRA	2.884e-17	1f
272	8	10653611	rs11781592	G	A	0.35	0.5	0.1	0.57			LNG, CRVX, SKIN	15 tissues	8 tissues		5 altered motifs			44 hits	RP1L1	intronic	rs11781592	8	10511121	RP1L1	8	10653611	RP1L1	1.318e-20	5
273	8	10653909	rs28722737	C	T	0.34	0.49	0.1	0.56			SKIN, CRVX	11 tissues	6 tissues	AP2GAMMA	7 altered motifs			44 hits	RP1L1	intronic	rs28722737	8	10511419	RP1L1	8	10653909	RP1L1	4.365e-21	2b
274	8	10654197	rs28459259	C	T	0.31	0.49	0.1	0.56			SKIN, CRVX	11 tissues	5 tissues		10 altered motifs			45 hits	RP1L1	intronic	rs28459259	8	10511707	RP1L1	8	10654197	RP1L1	4.571e-21	5
275	8	10655001	rs9969466	G	C	0.76	0.51	0.1	0.56			SKIN, CRVX	15 tissues	10 tissues	AP2ALPHA,AP2GAMMA,ZNF263	Rad21			44 hits	RP1L1	5'-UTR	rs9969466	8	10512511	RP1L1	8	10655001	RP1L1	1.778e-22	4
276	8	10657768	rs9969657	G	A	0.5	0.51	0.08	0.56				FAT			4 altered motifs		3 hits	41 hits	RP1L1		rs9969657	8	10515278	RP1L1	8	10657768	RP1L1	8.318e-22	6
277	8	10658169	rs11774552	C	T	0.5	0.51	0.08	0.56							STAT,Znf143			41 hits	RP1L1		rs11774552	8	10515679	RP1L1	8	10658169	RP1L1	1.175e-33	7
278	8	10658675	rs4841407	G	A	0.5	0.51	0.08	0.56					BLD		4 altered motifs			43 hits	RP1L1		rs4841407	8	10516185	RP1L1	8	10658675	RP1L1	1.175e-33	5
279	8	10658826	rs4841408	A	G	0.51	0.52	0.08	0.56				HRT			CTCF,Myc			43 hits	RP1L1		rs4841408	8	10516336	RP1L1	8	10658826	RP1L1	6.31e-22	5
280	8	10658864	rs4841409	A	G	0.87	0.54	0.1	0.56				HRT			Ets		3 hits	45 hits	RP1L1		rs4841409	8	10516374	RP1L1	8	10658864	RP1L1	1.445e-25	1f
281	8	10659370	rs56057779	G	C	0.46	0.51	0.08	0.56				FAT, HRT			ERalpha-a			34 hits	RP1L1		rs56057779	8	10516880	RP1L1	8	10659370	RP1L1	8.511e-26	5
282	8	10660990	rs10096777	G	A	0.89	0.53	0.1	0.56					MUS,BLD	CTCF	Foxm1,ZID			42 hits	RP1L1		rs10096777	8	10518500	RP1L1	8	10660990	RP1L1	2.63e-22	3a
283	8	10661775	rs7814795	C	T	0.68	0.52	0.1	0.55				5 tissues		CJUN	4 altered motifs			39 hits	RP1L1		rs7814795	8	10519285	MIR4286	8	10661775	MIR4286	4.677e-39	4
284	8	10661935	rs28680211	T	A	0.38	0.51	0.05	0.55				5 tissues			5 altered motifs			36 hits	RP1L1		rs28680211	8	10519445	MIR4286	8	10661935	MIR4286	9.772e-22	5
285	8	10664380	rs4841411	C	G	0.11	0.46	0.9	0.44							LBP-1,RREB-1			42 hits	RP1L1		rs4841411	8	10521890	MIR4286	8	10664380	MIR4286	7.943e-27	7
286	8	10752445	rs13276026	G	A	0.64	0.56	0.36	0.57							4 altered motifs			39 hits	SOX7		rs13276026	8	10609955	PINX1	8	10752445	LOC102723313	3.89e-23	6
287	8	10807559	rs4551304	A	G	0.86	0.62	0.38	0.61					PANC,BLD	SETDB1	EBF,RBP-Jkappa,SIX5			34 hits	PINX1	intronic	rs4551304	8	10665069	PINX1	8	10807559	PINX1	1.698e-22	4
288	8	10817678	rs7814757	T	C	0.88	0.62	0.35	0.61							NRSF,Rad21,Zic			35 hits	PINX1	intronic	rs7814757	8	10675188	PINX1	8	10817678	PINX1	6.918e-23	7
289	8	10879042	rs755856	C	G	0.77	0.58	0.1	0.64				5 tissues	4 tissues		4 altered motifs			46 hits	17kb 3' of XKR6		rs755856	8	10736552	XKR6	8	10879042	XKR6	1.288e-15	5
290	8	10884549	rs7843666	G	A	0.66	0.38	0	0.48							5 altered motifs		2 hits	47 hits	11kb 3' of XKR6		rs7843666	8	10742059	XKR6	8	10884549	XKR6	7.413e-17	7
291	8	10885911	rs17778581	C	T	0.75	0.38	0.01	0.48				BLD	BRN,BRN		6 altered motifs			49 hits	10kb 3' of XKR6		rs17778581	8	10743421	XKR6	8	10885911	XKR6	7.586e-18	6
292	8	10887959	rs10090444	C	G	0.75	0.41	0.02	0.53									4 hits	64 hits	8.1kb 3' of XKR6		rs10090444	8	10745469	XKR6	8	10887959	XKR6	2.239e-20	6
293	8	10900703	rs10107145	A	G	0.75	0.4	0.02	0.53					IPSC		HNF4			63 hits	XKR6	intronic	rs10107145	8	10758213	XKR6	8	10900703	XKR6	1.047e-20	7
294	8	10912273	rs11250086	A	G	0.66	0.38	0.02	0.48							Pax-1			46 hits	XKR6	intronic	rs11250086	8	10769783	XKR6	8	10912273	XKR6	3.162e-18	7
295	8	10913272	rs13270870	A	G	0.63	0.38	0.01	0.48							Smad3,TAL1			46 hits	XKR6	intronic	rs13270870	8	10770782	XKR6	8	10913272	XKR6	1.738e-18	6
296	8	10952941	rs10096511	A	G	0.85	0.45	0.12	0.52							EBF			68 hits	XKR6	intronic	rs10096511	8	10810451	XKR6	8	10952941	XKR6	6.457e-20	7
297	8	10954319	rs11250097	T	C	0.89	0.47	0.13	0.53										67 hits	XKR6	intronic	rs11250097	8	10811829	XKR6	8	10954319	XKR6	1.318e-20	7
298	8	10955687	rs35910832	T	C	0.89	0.44	0.14	0.52							Foxo			67 hits	XKR6	intronic	rs35910832	8	10813197	XKR6	8	10955687	XKR6	3.89e-20	6
299	8	10956394	rs10096381	G	T	0.84	0.44	0.13	0.52							DEC,E2A			68 hits	XKR6	intronic	rs10096381	8	10813904	XKR6	8	10956394	XKR6	3.162e-19	7
300	8	10958244	rs10111950	C	G	0.88	0.44	0.12	0.52					5 tissues		AP-1			65 hits	XKR6	intronic	rs10111950	8	10815754	XKR6	8	10958244	XKR6	3.631e-20	5
301	8	10959262	rs4314618	A	G	0.88	0.44	0.12	0.53				MUS			8 altered motifs			63 hits	XKR6	intronic	rs4314618	8	10816772	XKR6	8	10959262	XKR6	2.239e-20	6
302	8	10959687	rs10088408	C	T	0.88	0.44	0.12	0.52							RREB-1			66 hits	XKR6	intronic	rs10088408	8	10817197	XKR6	8	10959687	XKR6	1.95e-20	5
303	8	10961097	rs11250098	A	G	0.73	0.44	0.12	0.52				7 tissues	IPSC		6 altered motifs			66 hits	XKR6	intronic	rs11250098	8	10818607	XKR6	8	10961097	XKR6	8.71e-21	5
304	8	10961147	rs11250099	A	G	0.85	0.45	0.12	0.53				7 tissues		P300	Pax-5		5 hits	69 hits	XKR6	intronic	rs11250099	8	10818657	XKR6	8	10961147	XKR6	3.388e-20	1f
305	8	10962344	rs4841465	C	T	0.88	0.44	0.12	0.52				5 tissues	BRN		BAF155,SIX5,Znf143			69 hits	XKR6	intronic	rs4841465	8	10819854	XKR6	8	10962344	XKR6	1.413e-20	5
306	8	10974358	rs10096421	T	G	0.92	0.54	0.16	0.53					IPSC		Nanog			68 hits	XKR6	intronic	rs10096421	8	10831868	XKR6	8	10974358	XKR6	1.738e-17	5
307	8	10979904	rs10092831	A	C	0.75	0.44	0.08	0.51							4 altered motifs			63 hits	XKR6	intronic	rs10092831	8	10837414	XKR6	8	10979904	XKR6	5.495e-19	7
308	8	10985149	rs9969436	T	G	0.9	0.43	0.02	0.52							GATA			66 hits	XKR6	intronic	rs9969436	8	10842659	XKR6	8	10985149	XKR6	3.09e-19	7
309	8	11162068	rs7011756	C	G	0.94	0.4	0.06	0.52			BLD	ESDR, BLD			Foxk1,Foxp1,Pou2f2			80 hits	XKR6	intronic	rs7011756	8	11019578	XKR6	8	11162068	XKR6	6.026e-17	5
310	8	11166488	rs3021500	G	C	0.93	0.41	0.06	0.53										83 hits	XKR6	intronic	rs3021500	8	11023997	XKR6	8	11166488	XKR6	7.586e-17	7
311	8	11398066	rs9969423	A	C	0.25	0.35	0.08	0.5							5 altered motifs			47 hits	C8orf12	intronic	rs9969423	8	11255575	C8orf12	8	11398066	FAM167A-AS1	7.943e-18	6
312	8	11427710	rs12156009	A	C	0.45	0.35	0.04	0.51			ESDR, ESC, IPSC	6 tissues			4 altered motifs			55 hits	FAM167A	intronic	rs12156009	8	11285219	C8orf12	8	11427710	FAM167A	5.37e-12	7
313	8	11451683	rs13255193	T	C	0.43	0.4	0.01	0.55				7 tissues	8 tissues	USF1,USF2,MAX	5 altered motifs			60 hits	FAM167A	intronic	rs13255193	8	11309192	FAM167A	8	11451683	FAM167A	2.455e-14	3a
314	8	11539347	rs2409784	A	C	0.4	0.58	0.99	0.46			BLD	BLD, LNG	BLD,BLD	POL2,POL24H8,TBP	NRSF		12 hits	84 hits	BLK	intronic	rs2409784	8	11396856	BLK	8	11539347	BLK	7.762e-20	1d
315	8	11541502	rs2467519	TT	T,TC								BLD						55 hits	BLK	intronic	rs2467519	8	11399011	BLK	8	11541502	BLK	7.244e-14
316	8	11543607	rs11780851	G	A	0.29	0.4	0	0.51				4 tissues	BLD		SIX5,STAT,Znf143			71 hits	BLK	intronic	rs11780851	8	11401116	BLK	8	11543607	BLK	1.82e-17	7
317	8	11558303	rs6983727	C	T	0.18	0.4	0.02	0.5			BLD	10 tissues	5 tissues				3 hits	68 hits	BLK	intronic	rs6983727	8	11415812	BLK	8	11558303	BLK	2.399e-19	1f
318	8	11559376	rs4841559	C	T	0.28	0.4	0.02	0.52			BLD	4 tissues	9 tissues	BCL3,POL2,POL24H8	Nanog,TCF11::MafG			65 hits	RP11-148O21.2	intronic	rs4841559	8	11416885	BLK	8	11559376	BLK	1.413e-19	4
319	8	11559635	rs36048422	T	C	0.29	0.4	0.02	0.52			BLD	BLD, FAT, THYM	4 tissues	POL2	5 altered motifs			66 hits	RP11-148O21.2	intronic	rs36048422	8	11417144	BLK	8	11559635	BLK	1.738e-19	2b
320	8	11559641	rs34190028	G	T	0.29	0.38	0.01	0.52			BLD	BLD, FAT, THYM	BLD,THYM,PANC	POL2	4 altered motifs			67 hits	RP11-148O21.2	intronic	rs34190028	8	11417150	BLK	8	11559641	BLK	1.259e-19	2b
321	8	11559748	rs11783065	A	G	0.29	0.4	0.02	0.52				BLD, THYM	IPSC,BLD,BLD	POL2	5 altered motifs			67 hits	RP11-148O21.2	intronic	rs11783065	8	11417257	BLK	8	11559748	BLK	5.012e-20	4
322	8	11564536	rs1042701	G	A	0.16	0.4	0.02	0.51					27 tissues	CTCF,CMYC	10 altered motifs			72 hits	BLK	3'-UTR	rs1042701	8	11422045	BLK	8	11564536	BLK	4.467e-19	2c
323	8	11564621	rs7843987	T	C	0.16	0.4	0.02	0.51			16 tissues	10 tissues	31 tissues	15 bound proteins				70 hits	16bp 3' of BLK		rs7843987	8	11422130	BLK	8	11564621	BLK	5.623e-19	4
324	8	11564933	rs7822958	C	A	0.16	0.4	0.02	0.51			15 tissues	15 tissues	31 tissues	POL24H8	Rad21,SP2			74 hits	328bp 3' of BLK		rs7822958	8	11422442	BLK	8	11564933	BLK	5.37e-19	4
325	8	11568300	rs4841564	T	G	0.17	0.37	0.01	0.51				4 tissues	HRT		5 altered motifs			77 hits	3.7kb 3' of BLK		rs4841564	8	11425809	BLK	8	11568300	BLK	2.399e-20	6
326	8	11569281	rs1382563	G	C	0.17	0.4	0.01	0.51				HRT, OVRY	HRT,KID,OVRY		Nkx2,Pou5f1		4 hits	77 hits	4.7kb 3' of BLK		rs1382563	8	11426790	BLK	8	11569281	BLK	5.37e-20	6
327	8	11569624	rs9650661	G	T	0.17	0.4	0.01	0.51				HRT, OVRY	BLD,HRT,OVRY	EBF1	24 altered motifs			74 hits	5kb 3' of BLK		rs9650661	8	11427133	BLK	8	11569624	BLK	1.318e-12	5
328	8	11570128	rs7831039	A	T	0.17	0.4	0.01	0.51				4 tissues	HRT,OVRY		AFP1		4 hits	77 hits	5.5kb 3' of BLK		rs7831039	8	11427637	LINC00208	8	11570128	LINC00208	2.291e-20	1f
329	8	11570886	rs11991139	C	T	0.17	0.4	0.01	0.51				SKIN, HRT, MUS	HRT		EWSR1-FLI1			78 hits	5.4kb 5' of LINC00208		rs11991139	8	11428395	LINC00208	8	11570886	LINC00208	1.549e-20	7
330	8	11572976	rs899366	G	A	0.32	0.45	0.96	0.31			GI	13 tissues	11 tissues	CEBPB	Myb		4 hits	37 hits	3.3kb 5' of LINC00208		rs899366	8	11430485	LINC00208	8	11572976	LINC00208	1.514e-82	4
331	8	11573481	rs12679960	C	T	0.2	0.44	0.96	0.3			HRT, GI	11 tissues	7 tissues		Pax-5,Rad21		2 hits	38 hits	2.8kb 5' of LINC00208		rs12679960	8	11430990	LINC00208	8	11573481	LINC00208	2.042e-11	1d
332	8	11574944	rs35353728	C	T	0.09	0.43	0.96	0.3				5 tissues			10 altered motifs			36 hits	1.4kb 5' of LINC00208		rs35353728	8	11432453	LINC00208	8	11574944	LINC00208	1e-11	5
333	8	11575437	rs13256554	C	A	0.39	0.44	0.01	0.53				HRT			4 altered motifs			89 hits	875bp 5' of LINC00208		rs13256554	8	11432946	LINC00208	8	11575437	LINC00208	6.607e-21	7
334	8	11576271	rs2409797	T	C	0.65	0.46	0.01	0.55				HRT			4 altered motifs			92 hits	41bp 5' of LINC00208		rs2409797	8	11433780	LINC00208	8	11576271	LINC00208	5.37e-21	5
335	8	11576400	rs2898290	T	C	0.58	0.46	0.01	0.54				LIV	OVRY,MUS		E2F,LBP-1		9 hits	95 hits	LINC00208		rs2898290	8	11433909	LINC00208	8	11576400	LINC00208	1.148e-20	5
336	8	11576667	rs7464263	A	T	0.55	0.46	0.01	0.54				LIV						96 hits	LINC00208		rs7464263	8	11434176	LINC00208	8	11576667	LINC00208	3.802e-21	5
337	8	11576723	rs35558344	C	T	0.55	0.45	0.01	0.54				LIV			Obox3			89 hits	LINC00208		rs35558344	8	11434232	LINC00208	8	11576723	LINC00208	5.623e-21	5
338	8	11577283	rs2127127	C	G	0.17	0.43	0.01	0.54							Pou2f2			94 hits	LINC00208		rs2127127	8	11434792	LINC00208	8	11577283	LINC00208	1.122e-21	5
339	8	11577420	rs2127128	C	T	0.77	0.56	0.04	0.7					THYM		9 altered motifs		4 hits	37 hits	LINC00208	intronic	rs2127128	8	11434929	LINC00208	8	11577420	LINC00208	6.457e-12	5
340	8	11577540	rs35181953	G	A	0.4	0.44	0.01	0.54							CTCF,PPAR			92 hits	LINC00208	intronic	rs35181953	8	11435049	LINC00208	8	11577540	LINC00208	2.239e-21	5
341	8	11578007	rs10108511	T	C	0.66	0.47	0.01	0.55							5 altered motifs			94 hits	LINC00208	intronic	rs10108511	8	11435516	LINC00208	8	11578007	LINC00208	5.754e-21	5
342	8	11578055	rs2409798	C	T	0.41	0.44	0.01	0.54				HRT, MUS	OVRY		EWSR1-FLI1,SP1,TATA			95 hits	LINC00208	intronic	rs2409798	8	11435564	LINC00208	8	11578055	LINC00208	6.607e-21	6
343	8	11578418	rs2409799	G	C	0.45	0.44	0.01	0.55				4 tissues	MUS		7 altered motifs			97 hits	LINC00208		rs2409799	8	11435927	LINC00208	8	11578418	LINC00208	9.772e-21	5
344	8	11580555	rs968179	G	T	0.1	0.43	0.94	0.3				HRT, MUS, GI	HRT		SRF,TATA,ZNF263		4 hits	42 hits	LINC00208		rs968179	8	11438064	LINC00208	8	11580555	LINC00208	5.37e-12	5
345	8	11581716	rs12677326	G	A	0.26	0.43	0.93	0.29				HRT					5 hits	38 hits	373bp 3' of LINC00208		rs12677326	8	11439225	LINC00208	8	11581716	LINC00208	3.715e-14	7
346	8	11582452	rs11250149	C	G	0.09	0.4	0.92	0.31				HRT, MUS	OVRY				3 hits	38 hits	1.1kb 3' of LINC00208		rs11250149	8	11439961	LINC00208	8	11582452	LINC00208	3.02e-14	6
347	8	11582510	rs4841567	G	A	0.2	0.42	0.01	0.55				HRT, MUS						100 hits	1.2kb 3' of LINC00208		rs4841567	8	11440019	LINC00208	8	11582510	LINC00208	2.818e-21	7
348	8	11585695	rs4840572	G	A	0.12	0.42	0.94	0.3							BAF155			37 hits	4.4kb 3' of LINC00208		rs4840572	8	11443204	LINC00208	8	11585695	LINC00208	7.586e-15	7
349	8	11587007	rs10097870	G	A	0.58	0.57	0.99	0.44					6 tissues		SREBP			87 hits	5.7kb 3' of LINC00208		rs10097870	8	11444516	LINC00208	8	11587007	LINC00208	3.981e-21	5
350	8	11587328	rs13270267	C	T	0.25	0.56	0.99	0.44				5 tissues	HRT		BCL,LBP-9			93 hits	6kb 3' of LINC00208		rs13270267	8	11444837	LINC00208	8	11587328	LINC00208	7.413e-21	7
351	8	11588912	rs11780420	G	A	0.27	0.41	0.03	0.57				6 tissues			PLAG1			63 hits	7.6kb 3' of LINC00208		rs11780420	8	11446421	LINC00208	8	11588912	LINC00208	2.188e-20	5
352	8	11589128	rs11250150	G	A	0.38	0.45	0.03	0.58				9 tissues	4 tissues					57 hits	7.8kb 3' of LINC00208		rs11250150	8	11446637	LINC00208	8	11589128	LINC00208	6.761e-20	5
353	8	11589171	rs11250151	T	C	0.38	0.45	0.03	0.58				9 tissues	6 tissues		5 altered motifs			63 hits	7.8kb 3' of LINC00208		rs11250151	8	11446680	LINC00208	8	11589171	LINC00208	1.202e-20	5
354	8	11589291	rs11774572	C	T	0.38	0.45	0.03	0.58				9 tissues	7 tissues					61 hits	7.9kb 3' of LINC00208		rs11774572	8	11446800	LINC00208	8	11589291	LINC00208	6.31e-21	5
355	8	11589359	rs11778830	T	C	0.38	0.45	0.03	0.58			4 tissues	12 tissues	14 tissues		5 altered motifs			61 hits	8kb 3' of LINC00208		rs11778830	8	11446868	LINC00208	8	11589359	LINC00208	5.248e-21	5
356	8	11589446	rs17153498	G	A	0.37	0.45	0.03	0.58			4 tissues	12 tissues	27 tissues					57 hits	8.1kb 3' of LINC00208		rs17153498	8	11446955	LINC00208	8	11589446	LINC00208	4.677e-21	4
357	8	11589584	rs55896564	G	A	0.26	0.41	0.01	0.55			ESC, MUS, LIV	14 tissues	45 tissues	9 bound proteins	Pax-2,RREB-1,Znf143			90 hits	8.2kb 3' of LINC00208		rs55896564	8	11447093	LINC00208	8	11589584	LINC00208	3.02e-21	2b
358	8	11589610	rs56051089	C	T	0.38	0.45	0.03	0.58			ESC, MUS, LIV	14 tissues	49 tissues	9 bound proteins	Nanog			57 hits	8.3kb 3' of LINC00208		rs56051089	8	11447119	LINC00208	8	11589610	LINC00208	8.511e-21	4
359	8	11590170	rs7823651	G	C	0.68	0.46	0.03	0.59			LIV	5 tissues	SKIN,HRT		6 altered motifs			61 hits	8.8kb 3' of LINC00208		rs7823651	8	11447679	LINC00208	8	11590170	LINC00208	1.905e-19	5
360	8	11590819	rs1478891	G	C	0.18	0.45	0.94	0.35				LIV, HRT, SPLN	BLD,HRT	CEBPB				48 hits	9.5kb 3' of LINC00208		rs1478891	8	11448328	LINC00208	8	11590819	LINC00208	3.802e-19	4
361	8	11591020	rs1478892	G	T	0.18	0.45	0.94	0.35				HRT, SPLN, LIV		CEBPB	VDR,p300			53 hits	9.7kb 3' of LINC00208		rs1478892	8	11448529	LINC00208	8	11591020	LINC00208	1.479e-19	4
362	8	11591150	rs2244894	G	C	0.21	0.48	0.04	0.61				HRT, SPLN, LIV	HRT		NF-kappaB,Pou2f2			63 hits	9.8kb 3' of LINC00208		rs2244894	8	11448659	LINC00208	8	11591150	LINC00208	3.715e-19	5
363	8	11591245	rs1478894	C	T	0.54	0.48	0.94	0.36				HRT, SPLN, LIV			4 altered motifs			40 hits	9.9kb 3' of LINC00208		rs1478894	8	11448754	LINC00208	8	11591245	LINC00208	2.512e-19	5
364	8	11591816	rs13274269	G	T	0.12	0.47	0.95	0.35			LIV	4 tissues	HRT		FXR,VDR			53 hits	10kb 3' of LINC00208		rs13274269	8	11449325	LINC00208	8	11591816	LINC00208	5.37e-18	5
365	8	11592624	rs11995206	G	A	0.3	0.55	0.98	0.41				5 tissues	IPSC,LIV		5 altered motifs			76 hits	11kb 3' of LINC00208		rs11995206	8	11450133	LINC00208	8	11592624	LINC00208	2.818e-21	5
366	8	11592704	rs34163377	C	G	0.17	0.47	0.93	0.35				6 tissues	LIV		5 altered motifs			49 hits	11kb 3' of LINC00208		rs34163377	8	11450213	LINC00208	8	11592704	LINC00208	1.905e-19	5
367	8	11592913	rs2244648	A	G	0.79	0.59	0.99	0.45				5 tissues	OVRY,LIV		5 altered motifs			94 hits	12kb 3' of LINC00208		rs2244648	8	11450422	LINC00208	8	11592913	LINC00208	1.738e-21	5
368	8	11592963	rs35005793	G	A	0.13	0.47	0.93	0.35				5 tissues	HRT,OVRY,MUS		Pax-6			48 hits	12kb 3' of LINC00208		rs35005793	8	11450472	LINC00208	8	11592963	LINC00208	1.82e-19	5
369	8	11593078	rs10903340	T	G	0.34	0.56	0.98	0.41					IPSC,HRT,OVRY		Zfx		10 hits	76 hits	12kb 3' of LINC00208		rs10903340	8	11450587	LINC00208	8	11593078	LINC00208	5.888e-21	5
370	8	11593228	rs12677146	C	G	0.17	0.46	0.94	0.35				8 tissues	HRT,OVRY,MUS		HNF1,Irf		4 hits	53 hits	12kb 3' of LINC00208		rs12677146	8	11450737	LINC00208	8	11593228	LINC00208	1.096e-19	1f
371	8	11594668	rs4841569	G	A	0.11	0.37	0	0.42				12 tissues	8 tissues		Zfp410			36 hits	13kb 3' of LINC00208		rs4841569	8	11452177	LINC00208	8	11594668	LINC00208	5.754e-19	5
372	8	11595521	rs13277929	G	A	0.14	0.48	0.92	0.41				5 tissues			6 altered motifs			33 hits	14kb 3' of LINC00208		rs13277929	8	11453030	LINC00208	8	11595521	LINC00208	4.467e-15	6
373	8	11596162	rs7815172	T	C	0.26	0.5	0.93	0.41				HRT, OVRY			GR			29 hits	15kb 3' of LINC00208		rs7815172	8	11453671	LINC00208	8	11596162	LINC00208	1.202e-14	6
374	8	11596506	rs35986297	C	T	0.12	0.32	0	0.41				OVRY, PANC						40 hits	15kb 3' of LINC00208		rs35986297	8	11454015	LINC00208	8	11596506	LINC00208	4.365e-21	7
375	8	11596691	rs11250152	G	T	0.19	0.5	0.92	0.41				OVRY, PANC	OVRY		EBF		3 hits	26 hits	15kb 3' of LINC00208		rs11250152	8	11454200	LINC00208	8	11596691	LINC00208	1.622e-14	6
376	8	11597597	rs11777273	C	T	0.11	0.32	0	0.41				7 tissues	4 tissues		EBF,RXRA			46 hits	16kb 3' of LINC00208		rs11777273	8	11455106	LINC00208	8	11597597	LINC00208	3.02e-21	1f
377	8	11597753	rs34876360	G	A	0.11	0.45	0.88	0.33				6 tissues	4 tissues	HNF4A	ERalpha-a,Esr2,LF-A1			42 hits	16kb 3' of LINC00208		rs34876360	8	11455262	LINC00208	8	11597753	LINC00208	6.607e-20	4
378	8	11598441	rs12155794	C	T	0.13	0.34	0.01	0.4				4 tissues			LUN-1,Nkx2			38 hits	17kb 3' of LINC00208		rs12155794	8	11455950	LINC00208	8	11598441	LINC00208	3.388e-21	7
379	8	11599739	rs35373084	T	C	0.36	0.59	0.99	0.51				BRN, PANC, MUS	BRN		10 altered motifs			58 hits	18kb 3' of LINC00208		rs35373084	8	11457248	LINC00208	8	11599739	LINC00208	3.311e-17	5
380	8	11601509	rs13249843	G	T	0.15	0.46	0.92	0.34				BRN, OVRY, LIV	4 tissues		7 altered motifs			47 hits	20kb 3' of LINC00208		rs13249843	8	11459018	LINC00208	8	11601509	LINC00208	1.202e-19	5
381	8	11603602	rs13273172	A	G	0.12	0.35	0.01	0.47				ESDR			6 altered motifs			69 hits	22kb 3' of LINC00208		rs13273172	8	11461111	LINC00208	8	11603602	LINC00208	6.457e-25	6
382	8	11605008	rs13248109	C	A	0.11	0.32	0.01	0.41							Dmbx1,THAP1			44 hits	24kb 3' of LINC00208		rs13248109	8	11462517	LINC00208	8	11605008	LINC00208	8.511e-21	7
383	8	11605506	rs17807624	C	T	0.15	0.48	0.92	0.35				LIV			4 altered motifs		3 hits	52 hits	24kb 3' of LINC00208		rs17807624	8	11463015	LINC00208	8	11605506	LINC00208	6.607e-19	6
384	8	11605721	rs4840573	G	A	0.11	0.32	0.01	0.41				LIV	ESDR,BLD		4 altered motifs		2 hits	44 hits	24kb 3' of LINC00208		rs4840573	8	11463230	LINC00208	8	11605721	LINC00208	2.239e-21	1f
385	8	11609236	rs13278965	A	T	0.12	0.35	0.01	0.46							Myc,Osr		2 hits	76 hits	28kb 3' of LINC00208		rs13278965	8	11466745	LINC00208	8	11609236	LOC105379242	1.82e-24	6
386	8	11610048	rs13280442	C	G	0.16	0.37	0.01	0.46							6 altered motifs			72 hits	29kb 3' of LINC00208		rs13280442	8	11467557	LINC00208	8	11610048	LOC105379242	9.12e-24	6
387	8	11610254	rs13250871	G	A	0.09	0.31	0.01	0.41							Ets,NF-AT,SPIB			39 hits	29kb 3' of LINC00208		rs13250871	8	11467763	LINC00208	8	11610254	LOC105379242	1.905e-23	7
388	8	11749887	rs3735814	G	A	0.53	0.59	0.88	0.47				GI	HRT		RXRA		7 hits	26 hits	GATA4	intronic	rs3735814	8	11607396	GATA4	8	11749887	GATA4	2.138e-10	7
389	8	11750617	rs2645396	C	A	0.94	0.77	0.98	0.7				GI	ESDR,SKIN,BRST		Hoxa9,Irx,Lhx3			16 hits	GATA4	intronic	rs2645396	8	11608126	GATA4	8	11750617	GATA4	2.089e-10	5
390	8	11752486	rs36038176	C	T	0.02	0.23	0.02	0.3				ESDR	ESDR					12 hits	GATA4	intronic	rs36038176	8	11609995	GATA4	8	11752486	GATA4	3.236e-10	5
391	16	53763996	rs7206790	C	G	0.6	0.37	0.16	0.51				8 tissues	IPSC,BLD		5 altered motifs				FTO	intronic	rs7206790	16	53797908	FTO	16	53763996	FTO	4.677e-14	5
392	16	53764407	rs28429148	G	A	0.42	0.3	0.22	0.46				LNG, LIV			ELF1,Myc				FTO	intronic	rs28429148	16	53798319	FTO	16	53764407	FTO	8.318e-13	7
393	16	53764710	rs8047587	G	T	0.45	0.3	0.2	0.47				LNG, LIV			9 altered motifs				FTO	intronic	rs8047587	16	53798622	FTO	16	53764710	FTO	2.63e-13	7
394	16	53765384	rs9937521	C	T	0.42	0.28	0.18	0.4				LNG, LIV			ATF3,Mef2				FTO	intronic	rs9937521	16	53799296	FTO	16	53765384	FTO	4.571e-13	6
395	16	53765391	rs28562191	C	T	0.44	0.27	0.18	0.39				LNG, LIV			Hoxd10,Mef2				FTO	intronic	rs28562191	16	53799303	FTO	16	53765391	FTO	1.096e-11	6
396	16	53765595	rs9937053	G	A	0.44	0.3	0.19	0.45				HRT, LNG, LIV			10 altered motifs				FTO	intronic	rs9937053	16	53799507	FTO	16	53765595	FTO	7.244e-14	6
397	16	53765935	rs9937354	G	A	0.44	0.3	0.19	0.45				6 tissues			RREB-1				FTO	intronic	rs9937354	16	53799847	FTO	16	53765935	FTO	4.677e-13	5
398	16	53765993	rs9928094	A	G	0.44	0.3	0.19	0.45				6 tissues			Ahr::Arnt::HIF1,HIF1				FTO	intronic	rs9928094	16	53799905	FTO	16	53765993	FTO	2.63e-15	7
399	16	53766065	rs9930333	T	G	0.45	0.29	0.19	0.45				6 tissues			4 altered motifs				FTO	intronic	rs9930333	16	53799977	FTO	16	53766065	FTO	8.71e-14	7
400	16	53766073	rs9930397	T	A	0.44	0.3	0.19	0.45				6 tissues			6 altered motifs				FTO	intronic	rs9930397	16	53799985	FTO	16	53766073	FTO	8.71e-13	7
401	16	53766288	rs9940278	C	T	0.44	0.3	0.19	0.45				8 tissues	ESDR,KID,LIV		4 altered motifs				FTO	intronic	rs9940278	16	53800200	FTO	16	53766288	FTO	5.129e-13	6
402	16	53766656	rs9939973	G	A	0.44	0.3	0.19	0.45				15 tissues	5 tissues	10 bound proteins	SP1,TCF4				FTO	intronic	rs9939973	16	53800568	FTO	16	53766656	FTO	6.918e-14	4
403	16	53766717	rs9940646	C	G	0.44	0.3	0.19	0.45			LNG, LIV	14 tissues	4 tissues	10 bound proteins					FTO	intronic	rs9940646	16	53800629	FTO	16	53766717	FTO	7.586e-14	4
404	16	53766842	rs9940128	G	A	0.43	0.3	0.19	0.45			LNG, LIV	14 tissues	14 tissues	4 bound proteins	Ets,NF-AT1,TATA	2 hits			FTO	intronic	rs9940128	16	53800754	FTO	16	53766842	FTO	5.888e-14	4
405	16	53767042	rs1421085	T	C	0.05	0.26	0.16	0.44			LIV	14 tissues	LIV,VAS		Arid3a,HNF6	4 hits			FTO	intronic	rs1421085	16	53800954	FTO	16	53767042	FTO	1.23e-12	6
406	16	53767431	rs1421086	C	A	0.44	0.3	0.19	0.45				9 tissues			GCM,Pax-5,YY1				FTO	intronic	rs1421086	16	53801343	FTO	16	53767431	FTO	3.631e-13	6
407	16	53767637	rs9923147	C	T	0.42	0.3	0.19	0.45				7 tissues			CEBPB,Crx				FTO	intronic	rs9923147	16	53801549	FTO	16	53767637	FTO	5.129e-14	7
408	16	53768073	rs9923544	C	T	0.43	0.3	0.19	0.45			FAT	12 tissues							FTO	intronic	rs9923544	16	53801985	FTO	16	53768073	FTO	5.495e-14	7
409	16	53768582	rs11642015	C	T	0.05	0.26	0.16	0.44			6 tissues	17 tissues	17 tissues	5 bound proteins	Pax-5				FTO	intronic	rs11642015	16	53802494	FTO	16	53768582	FTO	3.388e-13	4
410	16	53769275	rs1558901	A	T	0.44	0.3	0.19	0.45			4 tissues	18 tissues	CRVX						FTO	intronic	rs1558901	16	53803187	FTO	16	53769275	FTO	3.02e-13	5
411	16	53769311	rs62048402	G	A	0.05	0.26	0.16	0.44			STRM, LNG	16 tissues	LNG,CRVX		Hand1				FTO	intronic	rs62048402	16	53803223	FTO	16	53769311	FTO	3.802e-13	7
412	16	53769662	rs1558902	T	A	0.05	0.26	0.16	0.44			LNG	16 tissues	GI		GATA	7 hits			FTO	intronic	rs1558902	16	53803574	FTO	16	53769662	FTO	2.818e-13	7
413	16	53771295	rs11075985	C	A	0.45	0.3	0.19	0.45				11 tissues	IPSC		Elf5,Nkx2				FTO	intronic	rs11075985	16	53805207	FTO	16	53771295	FTO	5.495e-14	7
414	16	53772541	rs56094641	A	G	0.05	0.26	0.16	0.44			STRM	14 tissues	HRT		GATA,Pou2f2,Pou5f1				FTO	intronic	rs56094641	16	53806453	FTO	16	53772541	FTO	3.311e-13	6
415	16	53775211	rs55872725	C	T	0.05	0.26	0.16	0.44				16 tissues	BLD	PU1,USF1	Cdx,Cdx2				FTO	intronic	rs55872725	16	53809123	FTO	16	53775211	FTO	2.399e-13	5
416	16	53775335	rs1121980	G	A	0.5	0.3	0.19	0.45			FAT, LNG	17 tissues	5 tissues	PU1,USF1		4 hits			FTO	intronic	rs1121980	16	53809247	FTO	16	53775335	FTO	3.715e-14	4
417	16	53776633	rs202153581	AC	A	0.01	0.01	0	0.01			LNG, BLD	16 tissues	MUS		7 altered motifs				FTO	intronic	rs202153581	16	53810546	FTO	16	53776634	FTO	3.89e-11
418	16	53776774	rs7193144	T	C	0.45	0.26	0.16	0.42			LNG, BLD	13 tissues			4 altered motifs				FTO	intronic	rs7193144	16	53810686	FTO	16	53776774	FTO	5.623e-13	6
419	16	53777031	rs62033399	C	T	0.45	0.26	0.16	0.42			STRM	10 tissues			35 altered motifs				FTO	intronic	rs62033399	16	53810943	FTO	16	53777031	FTO	3.89e-13	6
420	16	53777876	rs62033400	A	G	0.06	0.25	0.16	0.42				9 tissues	BRST,BRN	MAFK	Hmbox1,Mrg1::Hoxa9,TEF-1	1 hit			FTO	intronic	rs62033400	16	53811788	FTO	16	53777876	FTO	4.898e-13	5
421	16	53778521	rs8063057	T	C	0.45	0.26	0.16	0.42				9 tissues	PANC,BRST		4 altered motifs				FTO	intronic	rs8063057	16	53812433	FTO	16	53778521	FTO	3.89e-13	7
422	16	53779455	rs17817449	T	G	0.41	0.26	0.16	0.42				11 tissues	5 tissues		4 altered motifs	3 hits			FTO	intronic	rs17817449	16	53813367	FTO	16	53779455	FTO	1.95e-12	5
423	16	53779538	rs8043757	A	T	0.45	0.26	0.16	0.42				11 tissues	BRST,SKIN		Evi-1	1 hit			FTO	intronic	rs8043757	16	53813450	FTO	16	53779538	FTO	7.586e-13	7
424	16	53780451	rs9972653	G	T	0.45	0.26	0.16	0.42			BRST	16 tissues	BRST		8 altered motifs				FTO	intronic	rs9972653	16	53814363	FTO	16	53780451	FTO	7.943e-13	6
425	16	53781523	rs17817497	T	C	0.05	0.25	0.16	0.42			LNG	14 tissues	6 tissues	4 bound proteins					FTO	intronic	rs17817497	16	53815435	FTO	16	53781523	FTO	1.445e-12	4
426	16	53782363	rs8050136	C	A	0.47	0.27	0.16	0.42				8 tissues	BRST,CRVX,BRST	P300	6 altered motifs	11 hits	1 hit		FTO	intronic	rs8050136	16	53816275	FTO	16	53782363	FTO	2.818e-12	4
427	16	53782840	rs8051591	A	G	0.48	0.27	0.16	0.42				BRST, CRVX, SKIN	BRST		6 altered motifs				FTO	intronic	rs8051591	16	53816752	FTO	16	53782840	FTO	7.943e-13	6
428	16	53782926	rs9935401	G	A	0.48	0.27	0.16	0.42				BRST, SKIN			Cdx,HES1				FTO	intronic	rs9935401	16	53816838	FTO	16	53782926	FTO	8.511e-13	7
429	16	53784255	rs9933509	T	C	0.6	0.31	0.19	0.43				14 tissues	SKIN,BRST,LNG		p300				FTO	intronic	rs9933509	16	53818167	FTO	16	53784255	FTO	4.786e-13	5
430	16	53784548	rs3751812	G	T	0.05	0.25	0.16	0.42				12 tissues	7 tissues		Mrg,TBX5,Tgif1				FTO	intronic	rs3751812	16	53818460	FTO	16	53784548	FTO	1.514e-12	5
431	16	53784812	rs3751814	G	A	0.54	0.28	0.16	0.42			SKIN	8 tissues	SKIN		Cdx				FTO	intronic	rs3751814	16	53818724	FTO	16	53784812	FTO	4.898e-13	7
432	16	53784901	rs9931900	A	G	0.6	0.31	0.19	0.43				7 tissues	SKIN		4 altered motifs				FTO	intronic	rs9931900	16	53818813	FTO	16	53784901	FTO	1.318e-12	7
433	16	53784922	rs56313538	A	G	0.54	0.28	0.16	0.42				7 tissues	SKIN		11 altered motifs				FTO	intronic	rs56313538	16	53818834	FTO	16	53784922	FTO	1.413e-12	7
434	16	53785257	rs9936385	T	C	0.54	0.28	0.16	0.42				8 tissues	17 tissues		HDAC2,Pax-5	1 hit			FTO	intronic	rs9936385	16	53819169	FTO	16	53785257	FTO	7.413e-13	5
435	16	53785286	rs9923233	G	C	0.54	0.28	0.16	0.42				8 tissues	14 tissues		8 altered motifs				FTO	intronic	rs9923233	16	53819198	FTO	16	53785286	FTO	1.862e-12	5
436	16	53785455	rs9923312	G	A	0.54	0.28	0.16	0.42				8 tissues			AFP1,AP-1,Mef2				FTO	intronic	rs9923312	16	53819367	FTO	16	53785455	FTO	1.023e-12	7
437	16	53785859	rs11075988	G	A	0.53	0.28	0.16	0.42				BRST, FAT, LNG			HNF1,STAT,TLX1::NFIC				FTO	intronic	rs11075988	16	53819771	FTO	16	53785859	FTO	1.096e-12	7
438	16	53785965	rs11075989	C	T	0.54	0.28	0.16	0.42				BRST, FAT, LNG			6 altered motifs				FTO	intronic	rs11075989	16	53819877	FTO	16	53785965	FTO	1.122e-12	6
439	16	53785981	rs11075990	A	G	0.54	0.28	0.16	0.42				BRST, FAT, LNG			Nkx6-1,Pou4f3,Pou6f1	1 hit			FTO	intronic	rs11075990	16	53819893	FTO	16	53785981	FTO	5.888e-13	6
440	16	53786025	rs11075991	A	T	0.54	0.28	0.16	0.42				BRST, FAT, LNG			Gfi1,RORalpha1				FTO	intronic	rs11075991	16	53819937	FTO	16	53786025	FTO	6.457e-13	6
441	16	53786154	rs11075992	T	C	0.54	0.28	0.16	0.42				4 tissues	IPSC,BLD,BLD		AhR,Pax-8,RBP-Jkappa				FTO	intronic	rs11075992	16	53820066	FTO	16	53786154	FTO	1e-12	7
442	16	53786591	rs9926289	G	A	0.54	0.28	0.16	0.42				BRST			Sox				FTO	intronic	rs9926289	16	53820503	FTO	16	53786591	FTO	1.047e-12	7
443	16	53786615	rs9939609	T	A	0.54	0.28	0.16	0.42				BRST			Nanog,Pou5f1	6 hits			FTO	intronic	rs9939609	16	53820527	FTO	16	53786615	FTO	7.244e-13	7
444	16	53786901	rs9937709	A	G	0.6	0.31	0.19	0.43				BRST			5 altered motifs				FTO	intronic	rs9937709	16	53820813	FTO	16	53786901	FTO	8.71e-13	6
445	16	53787084	rs9927317	C	A,G	0.23	0.25	0.16	0.41				BRST							FTO	intronic	rs9927317	16	53820996	FTO	16	53787084	FTO	6.918e-12	7
446	16	53787213	rs17817712	A	G	0.05	0.25	0.16	0.42				BLD			MIF-1				FTO	intronic	rs17817712	16	53821125	FTO	16	53787213	FTO	2.884e-12	7
447	16	53787385	rs7206410	T	C	0.54	0.28	0.16	0.42				4 tissues	BLD,SKIN		BRCA1,Rhox11				FTO	intronic	rs7206410	16	53821297	FTO	16	53787385	FTO	1.122e-12	6
448	16	53787501	rs7206629	T	C	0.6	0.31	0.19	0.43				5 tissues		MAFK					FTO	intronic	rs7206629	16	53821413	FTO	16	53787501	FTO	7.413e-13	5
449	16	53787703	rs7202116	A	G	0.54	0.28	0.16	0.42				6 tissues	BLD	MAFF,MAFK	7 altered motifs	1 hit			FTO	intronic	rs7202116	16	53821615	FTO	16	53787703	FTO	1.047e-12	2b
450	16	53787778	rs7202296	A	G	0.54	0.28	0.16	0.42				6 tissues			10 altered motifs				FTO	intronic	rs7202296	16	53821690	FTO	16	53787778	FTO	9.772e-13	6
451	16	53787950	rs7201850	C	T	0.61	0.31	0.19	0.43				7 tissues			Foxo,RORalpha1				FTO	intronic	rs7201850	16	53821862	FTO	16	53787950	FTO	2.63e-14	7
452	16	53788230	rs66908032	C	A	0.53	0.28	0.16	0.42				4 tissues			8 altered motifs				FTO	intronic	rs66908032	16	53822142	FTO	16	53788230	FTO	1.096e-12	6
453	16	53788271	rs72803697	C	T	0.53	0.28	0.16	0.42				4 tissues			Myc,SP1				FTO	intronic	rs72803697	16	53822183	FTO	16	53788271	FTO	6.31e-13	7
454	16	53788325	rs62033403	A	G	0.54	0.28	0.16	0.42				FAT, STRM, SKIN			SRF				FTO	intronic	rs62033403	16	53822237	FTO	16	53788325	FTO	9.55e-13	6
455	16	53788327	rs62033404	A	G	0.54	0.28	0.16	0.42				FAT, STRM, SKIN			6 altered motifs				FTO	intronic	rs62033404	16	53822239	FTO	16	53788327	FTO	9.772e-13	7
456	16	53788475	rs62033405	C	T	0.05	0.25	0.16	0.42				FAT, STRM, SKIN			AhR::Arnt,Arnt				FTO	intronic	rs62033405	16	53822387	FTO	16	53788475	FTO	1.349e-12	7
457	16	53788528	rs7206122	G	A	0.53	0.28	0.16	0.43				FAT, STRM, SKIN			4 altered motifs				FTO	intronic	rs7206122	16	53822440	FTO	16	53788528	FTO	1.122e-12	7
458	16	53788590	rs7190396	T	G	0.54	0.27	0.15	0.42				FAT, STRM, SKIN							FTO	intronic	rs7190396	16	53822502	FTO	16	53788590	FTO	1.259e-12	7
459	16	53788739	rs7185735	A	G	0.54	0.28	0.16	0.42				6 tissues			Gcm1,Mef2	1 hit			FTO	intronic	rs7185735	16	53822651	FTO	16	53788739	FTO	1.096e-13	7
460	16	53789815	rs79994966	T	C	0.05	0.25	0.16	0.42				FAT, STRM, BRST			12 altered motifs				FTO	intronic	rs79994966	16	53823727	FTO	16	53789815	FTO	2.512e-12	6
461	16	53790314	rs62033406	A	G	0.08	0.3	0.52	0.45				4 tissues			HMG-IY,Zec				FTO	intronic	rs62033406	16	53824226	FTO	16	53790314	FTO	5.754e-12	6
462	16	53791576	rs9941349	C	T	0.16	0.28	0.19	0.43				BRN				1 hit			FTO	intronic	rs9941349	16	53825488	FTO	16	53791576	FTO	1.38e-13	7
463	16	53791993	rs56137030	G	A	0.07	0.25	0.16	0.42							5 altered motifs				FTO	intronic	rs56137030	16	53825905	FTO	16	53791993	FTO	7.244e-12	7
464	16	53792116	rs28567725	T	C	0.19	0.28	0.19	0.43			PANC, PLCNT				Foxc1,Pax-6				FTO	intronic	rs28567725	16	53826028	FTO	16	53792116	FTO	1.66e-12	7
465	16	53793267	rs9931494	C	G	0.14	0.28	0.19	0.43				FAT			11 altered motifs				FTO	intronic	rs9931494	16	53827179	FTO	16	53793267	FTO	4.898e-14	7
466	16	53793567	rs10468280	A	G	0.05	0.25	0.16	0.42							Maf,NRSF				FTO	intronic	rs10468280	16	53827479	FTO	16	53793567	FTO	2.042e-12	7
467	16	53794050	rs62033408	A	G	0.05	0.25	0.16	0.42				ESDR, PANC	OVRY	GATA3	Cdx,HNF1				FTO	intronic	rs62033408	16	53827962	FTO	16	53794050	FTO	1.95e-12	4
468	16	53794154	rs17817964	C	T	0.06	0.25	0.17	0.42				5 tissues		GATA3	5 altered motifs	1 hit			FTO	intronic	rs17817964	16	53828066	FTO	16	53794154	FTO	1.82e-13	2b
469	16	53796143	rs62033413	C	G	0.06	0.26	0.17	0.43							HNF4,Nkx2				FTO	intronic	rs62033413	16	53830055	FTO	16	53796143	FTO	9.55e-11	7
470	16	53796540	rs9930501	A	G	0.18	0.29	0.2	0.45							Nanog,SRF				FTO	intronic	rs9930501	16	53830452	FTO	16	53796540	FTO	1.549e-10	7
471	16	53796553	rs9930506	A	G	0.18	0.29	0.2	0.45							Irx	2 hits			FTO	intronic	rs9930506	16	53830465	FTO	16	53796553	FTO	5.37e-10	7
472	16	53796579	rs9932754	T	C	0.18	0.29	0.2	0.45							6 altered motifs				FTO	intronic	rs9932754	16	53830491	FTO	16	53796579	FTO	1.288e-10	6
473	16	53796955	rs9933040	T	A	0.18	0.29	0.2	0.45				BLD	BLD	CTCF	CTCF,Rad21				FTO	intronic	rs9933040	16	53830867	FTO	16	53796955	FTO	8.511e-11	5
474	16	53797234	rs9922708	C	T	0.17	0.29	0.2	0.44				HRT	HRT		HEN1,Pbx-1,TAL1				FTO	intronic	rs9922708	16	53831146	FTO	16	53797234	FTO	2.57e-10	6
475	16	53797442	rs72805611	C	T	0.06	0.26	0.17	0.43				HRT	HRT		ATF3,Maf,Pbx3				FTO	intronic	rs72805611	16	53831354	FTO	16	53797442	FTO	1.148e-10	7
476	16	53797859	rs9922619	G	T	0.14	0.29	0.2	0.45							6 altered motifs	1 hit			FTO	intronic	rs9922619	16	53831771	FTO	16	53797859	FTO	3.715e-10	7
477	16	53800695	rs7188250	T	C	0.06	0.25	0.16	0.42							Cdx,Foxp1,GR				FTO	intronic	rs7188250	16	53834607	FTO	16	53800695	FTO	4.365e-10	6
478	16	53800696	rs72805612	G	A	0.05	0.25	0.16	0.42							Cdx,GR,PRDM1				FTO	intronic	rs72805612	16	53834608	FTO	16	53800696	FTO	3.388e-10	6
479	16	53803232	rs11075993	G	T	0.05	0.26	0.17	0.43				7 tissues	BRST		13 altered motifs				FTO	intronic	rs11075993	16	53837144	FTO	16	53803232	FTO	1.38e-10	6
480	16	53803430	rs72805613	A	G	0.05	0.26	0.17	0.43				7 tissues	BRST		18 altered motifs				FTO	intronic	rs72805613	16	53837342	FTO	16	53803430	FTO	1.585e-10	6
481	16	53806613	rs12149574	C	G	0.05	0.26	0.17	0.43				7 tissues	THYM		Pax-4,Rad21				FTO	intronic	rs12149574	16	53840525	FTO	16	53806613	FTO	1.82e-10	7
482	16	53808996	rs12149832	G	A	0.06	0.26	0.16	0.43			BRN	11 tissues	BRST		XBP-1	1 hit			FTO	intronic	rs12149832	16	53842908	FTO	16	53808996	FTO	7.079e-10	6
483	16	53811257	rs11649091	T	G	0.1	0.27	0.17	0.46				5 tissues			10 altered motifs				FTO	intronic	rs11649091	16	53845169	FTO	16	53811257	FTO	1.514e-10	6
	B. Potential Novel SNVs/Genes
Nb	Chr	Position (hg38)	Variant	Ref	Alt	AFR freq	AMR freq	ASN freq	EUR freq	GERP cons	Siphy cons	Promoter histone marks	Enhancer histone marks	DNAse	Proteins bound	Motifs changed	NHGRI/EBI GWAS hits	GRASP QTL hits	Selected eQTL hits	GENCODE genes	dbSNP func annot	SNV	Chr138	Position 138 (hg19)	HUGO 138 (hg19)	chr150 (hg38)	Position 150 (hg38)	HUGO 150 (hg38)	P Value for Stage 1 and Stage 2	RegulomeDB score*
1	3	178276855	rs10662363	A	ATACT	0.06	0	0	0							Nkx3,Sox				RP11-33A14.1		rs10662363	3	177994643	KCNMB2-IT1	3	178276855	LOC105374235	8.13e-09
2	3	178279359	rs58548564	A	G	0.06	0	0	0							AP-1,Pax-5				RP11-33A14.1		rs58548564	3	177997147	KCNMB2-IT1	3	178279359	LOC105374235	9.12e-10	6
3	3	178283140	rs9862344	C	T	0.06	0	0	0							Maf,NRSF,Obox6				RP11-33A14.1		rs9862344	3	178000928	KCNMB2-IT1	3	178283140	LOC105374235	7.94e-09	7
4	3	178287933	rs73884351	C	G	0.05	0	0	0							9 altered motifs				RP11-33A14.1		rs73884351	3	178005721	KCNMB2-IT1	3	178287933	LOC105374235	6.17e-10	6
5	4	47000363	rs145429126	T	G	0.02	0	0	0				HRT			Foxj2,Mef2				GABRB1		rs145429126	4	47002380	GABRA4	4	47000363	GABRA4	3.02e-08
6	6	65489746	rs80158983	C	T	0.01	0.09	0.13	0.02							CEBPB,Hoxa7				EYS	intronic	rs80158983	6	66199639	EYS	6	65489746	EYS	1.288e-08	7
7	6	133759717	rs76987554	C	T	0.09	0.01	0	0				LNG, GI	KID,LNG		Hoxa13,Pou3f2				467bp 3' of RP3-323P13.2	intronic	rs76987554	6	134080855	MGC34034	6	133759717	TARID	2.188e-08	5
8	6	133766551	rs79030490	C	A	0.09	0.01	0	0				FAT							RP3-323P13.2	intronic	rs79030490	6	134087689	MGC34034	6	133766551	TARID	5.495e-08	6
9	8	35841899	rs79505281	C	A	0.01	0	0	0			ESDR				4 altered motifs				20kb 5' of RP11-473J6.1		rs79505281	8	35699417	UNC5D	8	35841899	UNC5D	6.026e-07	7
10	8	94098516	rs7006531	A	G	0.19	0.02	0	0				HRT			4 altered motifs				KB-1184D12.1		rs7006531	8	95110744	CDH17	8	94098516	CDH17	2.57e-07	7
11	8	94105161	rs115888294	T	C	0.14	0.01	0	0				SKIN, BONE			8 altered motifs				838bp 5' of KB-1184D12.1		rs115888294	8	95117389	CDH17	8	94105161	CDH17	1.585e-07	6
12	8	94107706	rs28458347	A	T	0.13	0.01	0	0				FAT, SKIN			CTCF				3.4kb 5' of KB-1184D12.1		rs28458347	8	95119934	CDH17	8	94107706	CDH17	2.344e-07	7
13	8	94108664	rs114837267	C	T	0.13	0.01	0	0				5 tissues	6 tissues		KAP1				4.3kb 5' of KB-1184D12.1		rs114837267	8	95120892	CDH17	8	94108664	CDH17	2.818e-07	5
14	8	94109389	rs28602319	A	T	0.13	0.01	0	0				6 tissues	9 tissues		DMRT2,DMRT3,p300				5.1kb 5' of KB-1184D12.1		rs28602319	8	95121617	CDH17	8	94109389	CDH17	3.467e-07	5
15	9	29158724	rs62554043	G	A	0.01	0.08	0.07	0.05											270kb 5' of MIR873	intronic	rs62554043	9	29158722	LINGO2	9	29158724	LINGO2	4.57e-08	7
16	9	29159036	rs62554044	G	C	0.01	0.08	0.07	0.05							DEC,p53				270kb 5' of MIR873	intronic	rs62554044	9	29159034	LINGO2	9	29159036	LINGO2	4.37e-08	6
17	9	29159981	rs16914378	T	C	0.01	0.08	0.07	0.05							8 altered motifs				271kb 5' of MIR873	intronic	rs16914378	9	29159979	LINGO2	9	29159981	LINGO2	3.31e-08	6
18	9	29163122	rs62554047	C	T	0.01	0.08	0.07	0.05					OVRY		5 altered motifs				274kb 5' of MIR873	intronic	rs62554047	9	29163120	LINGO2	9	29163122	LINGO2	4.47e-08	6
19	9	29163361	rs62554048	C	A	0.01	0.08	0.07	0.05							Myc,Pou2f2,TCF4				274kb 5' of MIR873	intronic	rs62554048	9	29163359	LINGO2	9	29163361	LINGO2	4.37e-08	6
20	9	29164201	rs74717740	T	C	0.01	0.08	0.07	0.05							4 altered motifs				275kb 5' of MIR873	intronic	rs74717740	9	29164199	LINGO2	9	29164201	LINGO2	3.55e-08	6
21	9	29166591	rs1002855	G	A	0.01	0.09	0.07	0.05							Ncx,Nkx2,Nkx3				278kb 5' of MIR873	intronic	rs1002855	9	29166589	LINGO2	9	29166591	LINGO2	2e-08	7
22	9	29169612	rs62554050	T	A	0.01	0.08	0.07	0.05							10 altered motifs				281kb 5' of MIR873	intronic	rs62554050	9	29169610	LINGO2	9	29169612	LINGO2	1.48e-08	5
23	9	29180723	rs10491657	T	G	0.01	0.09	0.07	0.05							Foxo				292kb 5' of MIR873	intronic	rs10491657	9	29180721	LINGO2	9	29180723	LINGO2	8.13e-09	7
24	9	29181717	rs62554053	T	C	0.01	0.09	0.07	0.05				ESC, IPSC, SKIN	SKIN		Sox				293kb 5' of MIR873	intronic	rs62554053	9	29181715	LINGO2	9	29181717	LINGO2	7.76e-09	6
25	9	29184534	rs62554054	T	C	0.01	0.09	0.07	0.05				SKIN							296kb 5' of MIR873	intronic	rs62554054	9	29184532	LINGO2	9	29184534	LINGO2	1.1e-08	7
26	9	29194499	rs16914428	G	A	0.01	0.09	0.07	0.05				ESC, ESDR	THYM		HMG-IY,SRF				306kb 5' of MIR873	intronic	rs16914428	9	29194497	LINGO2	9	29194499	LINGO2	1.35e-08	5
27	9	29196976	rs61494734	T	C	0.01	0.09	0.07	0.05											308kb 5' of MIR873	intronic	rs61494734	9	29196974	LINGO2	9	29196976	LINGO2	1.59e-09	7
28	9	29199200	rs62550461	T	A	0.01	0.09	0.07	0.05				SKIN			Zfp410				310kb 5' of MIR873	intronic	rs62550461	9	29199198	LINGO2	9	29199200	LINGO2	1.82e-09	7
29	9	29207573	rs12682929	C	A	0.01	0.09	0.07	0.05				IPSC, SKIN			4 altered motifs				319kb 5' of MIR873	intronic	rs12682929	9	29207571	LINGO2	9	29207573	LINGO2	5.13e-09	7
30	9	29209156	rs78742613	A	T	0.01	0.08	0.07	0.05				ESC, PANC	GI		8 altered motifs				320kb 5' of MIR873	intronic	rs78742613	9	29209154	LINGO2	9	29209156	LINGO2	7.24e-09	6
31	9	98144462	rs73655198	A	T	0.02	0	0	0				SKIN, LIV, GI	4 tissues		CDP,Pou5f1				CORO2A	intronic	rs73655198	9	100906744	CORO2A	9	98144462	CORO2A	5.495e-09	5
32	9	98145201	rs73655199	G	A	0.02	0	0	0				7 tissues			Ets,GR,NRSF				CORO2A	intronic	rs73655199	9	100907483	CORO2A	9	98145201	CORO2A	3.162e-09	7
33	10	49473111	rs4253197	A	G	0.09	0.02	0	0							Myc				ERCC6	intronic	rs4253197	10	50681157	ERCC6	10	49473111	ERCC6	6.607e-07	7
34	10	119468517	rs201383951	C	CT	0.03	0.01	0.04	0.01					PANC		29 altered motifs				13kb 3' of GRK5		rs201383951	10	121228029	GRK5	10	119468517	GRK5	2.69e-09
35	10	122256927	rs11200509	G	C	0.16	0.2	0.22	0.03				MUS			ATF3,Nkx3				2.4kb 3' of TACC2		rs11200509	10	124016442	TACC2	10	122256927	TACC2	6.761e-09	7
36	11	11233360	rs10741534	T	C	0.94	0.81	0.74	0.84							Hdx,Ik-1		2 hits		9.8kb 3' of CTD-3224I3.3		rs10741534	11	11254907	GALNT18	11	11233360	LOC105376550	8.318e-08	7
37	11	107579224	rs139077481	T	C	0.01	0	0	0							Rad21,YY1				12kb 5' of ELMOD1		rs139077481	11	107449950	ELMOD1	11	107579224	ELMOD1	1.318e-07
38	11	107585861	rs150058240	T	C	0.01	0	0	0			BLD		SKIN		Ets,Pax-5				5.2kb 5' of ELMOD1		rs150058240	11	107456587	ELMOD1	11	107585861	ELMOD1	1.479e-07
39	11	107620352	rs147419172	C	T	0.01	0	0	0				MUS, VAS			Dlx5,SIX5				ELMOD1	intronic	rs147419172	11	107491078	ELMOD1	11	107620352	ELMOD1	3.631e-07
40	12	61317029	rs186331780	G	A	0.02	0	0	0							HNF4,NF-AT,Pou3f2				391kb 3' of FAM19A2		rs186331780	12	61710810	FAM19A2	12	61317029	LOC105369793	2.34e-08
41	13	67705907	rs187888844	T	C	0.01	0	0	0					PANC		Mef2,Sox				326kb 3' of LINC00364		rs187888844	13	68280039	PCDH9	13	67705907	LOC107984622	4.27e-08
42	13	105934773	rs116464496	T	G	0.02	0	0	0					LNG						37kb 5' of SNORA25		rs116464496	13	106587122	LINC00343	13	105934773	LINC00343	4.47e-08	7
43	18	29470353	rs139085806	T	C	0.03	0	0	0							Pax-4				13kb 5' of AC091321.1		rs139085806	18	27050318	MIR302F	18	29470353	LOC105372045	2.692e-12
44	18	29491126	rs142398405	G	C	0.03	0	0	0											7.7kb 3' of AC091321.1		rs142398405	18	27071091	MIR302F	18	29491126	LOC105372045	4.467e-12
45	18	29493079	rs114308354	A	G	0.03	0	0	0											9.7kb 3' of AC091321.1		rs114308354	18	27073044	MIR302F	18	29493079	LOC105372045	4.677e-12	6
46	18	29499672	rs116329958	A	G	0.03	0	0	0							Gm397,Irf,Sox				16kb 3' of AC091321.1		rs116329958	18	27079637	MIR302F	18	29499672	LOC105372045	4.365e-12	6
47	18	29505020	rs142392787	G	A	0.03	0	0	0							4 altered motifs				13kb 5' of RP11-784B15.1		rs142392787	18	27084985	MIR302F	18	29505020	LOC105372045	3.02e-12
48	18	29506448	rs139820552	C	G	0.03	0	0	0							ZBTB33				12kb 5' of RP11-784B15.1		rs139820552	18	27086413	MIR302F	18	29506448	LOC105372045	1.349e-12
49	18	29506810	rs145034505	A	G	0.03	0	0	0							Maf				11kb 5' of RP11-784B15.1		rs145034505	18	27086775	MIR302F	18	29506810	LOC105372045	1.318e-12
50	18	29508647	rs140520944	G	T	0.03	0	0	0							4 altered motifs				9.6kb 5' of RP11-784B15.1		rs140520944	18	27088612	MIR302F	18	29508647	LOC105372045	1e-12
51	18	29513917	rs145126018	T	C	0.03	0	0	0							11 altered motifs				4.3kb 5' of RP11-784B15.1		rs145126018	18	27093882	MIR302F	18	29513917	LOC105372045	7.943e-11
52	19	31669942	rs142673685	C	T	0.02	0	0	0				MUS, LNG			AP-2rep,NF-kappaB,Zbtb3				14kb 5' of RN5S471		rs142673685	19	32160848	THEG5	19	31669942	LOC105372361	5.012e-08
53	19	31670199	rs150556122	G	A	0.02	0	0	0				MUS, LNG, BONE			Foxp1,Hmbox1,p300				15kb 5' of RN5S471		rs150556122	19	32161105	THEG5	19	31670199	LOC105372361	5.248e-08
	C. Novel SNVs/Genes from Correlated Meta-Analysis
Nb	Chr	Position (hg38)	Variant	Ref	Alt	AFR freq	AMR freq	ASN freq	EUR freq	GERP cons	Siphy cons	Promoter histone marks	Enhancer histone marks	DNAse	Proteins bound	Motifs changed	NHGRI/EBI GWAS hits	GRASP QTL hits	Selected eQTL hits	GENCODE genes	dbSNP func annot	SNV	Chr138	Position 138 (hg19)	HUGO 138 (hg19)	chr150 (hg38)	Position 150 (hg38)	HUGO 150 (hg38)	RegulomeDB score*
1	1	83336112	rs200124401	C	CTT	0.48	0.29	0.14	0.31							4 altered motifs				110kb 5' of RP11-413G15.1		rs200124401	1	83801795	TTLL7	1	83336112	LOC107985037
2	1	206648224	rs3813963	C	T	0	0.01	0	0.01				HRT, BLD			TEF-1				DYRK3	synonymous	rs3813963	1	206821569	DYRK3	1	206648224	DYRK3	7
3	1	206683281	rs80169249	T	C	0	0.01	0	0.02				8 tissues			Foxo,GATA,Spz1				DYRK3		rs80169249	1	206856626	MAPKAPK2	1	206683281	LOC105372875	7
4	4	161336738	rs185597356	C	T	0.01	0.01	0	0.01				BRST, LNG							42kb 5' of RP11-234O6.2		rs185597356	4	162257890	FSTL5	4	161336738	FSTL5
5	8	8506173	rs2980755	A	G	0.46	0.47	0.67	0.47				IPSC			4 altered motifs			27 hits	45kb 5' of CTA-398F10.2		rs2980755	8	8363683	SGK223	8	8506173	LOC107986913	7
6	8	8520592	rs13270194	T	C	0.63	0.61	0.88	0.49				BRST, BLD, SKIN	BLD,LNG		Pax-4,SREBP,Zic			23 hits	35kb 3' of CTD-3023L14.3		rs13270194	8	8378102	SGK223	8	8520592	LOC105379224	7
7	8	9802688	rs34062996	G	A	0.48	0.54	0.46	0.63				LIV						2 hits	20kb 3' of TNKS		rs34062996	8	9660198	TNKS	8	9802688	TNKS	6
8	8	9822124	rs1976671	A	G	0.42	0.41	0.53	0.36							21 altered motifs			2 hits	40kb 3' of TNKS		rs1976671	8	9679634	TNKS	8	9822124	TNKS	6
9	8	9936091	rs483916	A	C	0.6	0.42	0.03	0.56							NF-I,STAT			5 hits	4.3kb 5' of snoU13		rs483916	8	9793601	MIR124-1	8	9936091	MIR124-1	7
10	8	9938811	rs615632	C	T	0.72	0.42	0.04	0.56							CCNT2,TAL1			3 hits	7kb 5' of snoU13		rs615632	8	9796321	MIR124-1	8	9938811	MIR124-1	5
11	8	10119030	rs7843924	C	T	0.43	0.59	0.95	0.42							13 altered motifs			6 hits	MSRA	intronic	rs7843924	8	9976540	MSRA	8	10119030	MSRA	6
12	8	10122482	rs2062331	A	G	0.46	0.59	0.95	0.42							Nkx2,Nkx3,TEF-1		2 hits	5 hits	MSRA	intronic	rs2062331	8	9979992	MSRA	8	10122482	MSRA	6
13	8	10660990	rs10096777	G	A	0.89	0.53	0.1	0.56					MUS,BLD	CTCF	Foxm1,ZID			42 hits	RP1L1		rs10096777	8	10518500	RP1L1	8	10660990	RP1L1	3a
14	8	10661775	rs7814795	C	T	0.68	0.52	0.1	0.55				5 tissues		CJUN	4 altered motifs			39 hits	RP1L1		rs7814795	8	10519285	MIR4286	8	10661775	MIR4286	4
15	8	10752445	rs13276026	G	A	0.64	0.56	0.36	0.57							4 altered motifs			39 hits	SOX7		rs13276026	8	10609955	PINX1	8	10752445	LOC102723313	6
16	8	10961147	rs11250099	A	G	0.85	0.45	0.12	0.53				7 tissues		P300	Pax-5		5 hits	69 hits	XKR6	intronic	rs11250099	8	10818657	XKR6	8	10961147	XKR6	1f
17	8	11427710	rs12156009	A	C	0.45	0.35	0.04	0.51			ESDR, ESC, IPSC	6 tissues			4 altered motifs			55 hits	FAM167A	intronic	rs12156009	8	11285219	C8orf12	8	11427710	FAM167A	7
18	8	11451683	rs13255193	T	C	0.43	0.4	0.01	0.55				7 tissues	8 tissues	USF1,USF2,MAX	5 altered motifs			60 hits	FAM167A	intronic	rs13255193	8	11309192	FAM167A	8	11451683	FAM167A	3a
19	8	11559376	rs4841559	C	T	0.28	0.4	0.02	0.52			BLD	4 tissues	9 tissues	BCL3,POL2,POL24H8	Nanog,TCF11::MafG			65 hits	RP11-148O21.2	intronic	rs4841559	8	11416885	BLK	8	11559376	BLK	4
20	8	11591245	rs1478894	C	T	0.54	0.48	0.94	0.36				HRT, SPLN, LIV			4 altered motifs			40 hits	9.9kb 3' of LINC00208		rs1478894	8	11448754	LINC00208	8	11591245	LINC00208	5
21	8	11605721	rs4840573	G	A	0.11	0.32	0.01	0.41				LIV	ESDR,BLD		4 altered motifs		2 hits	44 hits	24kb 3' of LINC00208		rs4840573	8	11463230	LINC00208	8	11605721	LINC00208	1f
22	8	11610048	rs13280442	C	G	0.16	0.37	0.01	0.46							6 altered motifs			72 hits	29kb 3' of LINC00208		rs13280442	8	11467557	LINC00208	8	11610048	LOC105379242	6
23	11	65832185	rs77779142	C	T	0.07	0.14	0.17	0.16				4 tissues						90 hits	CFL1		rs77779142	11	65599656	SNX32	11	65832185	SNX32	7
24	11	65874946	rs11227333	C	T	0.05	0.17	0.07	0.18							12 altered motifs			87 hits	1.4kb 5' of EFEMP2		rs11227333	11	65642417	EFEMP2	11	65874946	EFEMP2	6
25	11	65894964	rs201407003	T	TCC	0.15	0.15	0.22	0.15			BRST, SKIN	7 tissues	BLD	POL2,POL24H8	17 altered motifs			87 hits	FOSL1	intronic	rs201407003	11	65662435	FOSL1	11	65894964	FOSL1
26	15	43645473	rs117519896	T	C	0	0.02	0	0.02							Brachyury				CATSPER2	intronic	rs117519896	15	43937671	CATSPER2	15	43645473	CATSPER2	5
27	16	53765384	rs9937521	C	T	0.42	0.28	0.18	0.4				LNG, LIV			ATF3,Mef2				FTO	intronic	rs9937521	16	53799296	FTO	16	53765384	FTO	6
28	17	53625691	rs2957398	C	G	0.41	0.63	0.7	0.68							6 altered motifs				88kb 3' of AC090079.1		rs2957398	17	51703052	KIF2B	17	53625691	LOC107984982	6
29	18	71962177	rs146091319	C	T	0	0.01	0	0.02					BRN		4 altered motifs				18kb 5' of RP11-736G13.1		rs146091319	18	69629413	LOC100505776	18	71962177	LOC102725148
30	19	11433340	rs111700101	G	A	0.09	0.13	0.03	0.06					BLD		Maf,NRSF,Smad			2 hits	CCDC151	intronic	rs111700101	19	11544162	CCDC151	19	11433340	CCDC151	7
The annotation of variants was sourced from NCBI dbSNP build 138 (hg19) during the analyses and updated to dbSNP build 150 (hg38) for reporting results. Abbreviations: Nb, order number based on SNVs; Position, dbSNP build 150 (hg38) annotation; Variant, single nucleotide variant (SNV) ; Ref, reference allele; Alt, alternative allele; AFR Freq, Freq of Ref in African ancestry; ASN Freq, Freq of Re…
