# Supplementary material for: Novel genetic associations for blood pressure identified via gene-alcohol interaction in up to 570K individuals across multiple ancestries
Source: PLoS One. 2018 Jun 18;13(6):e0198166. doi: 10.1371/journal.pone.0198166 (PMC6005576; doi:10.1371/journal.pone.0198166)
Supplement: S14 Table — Target genes (Tissues and P-Values). Association findings from European Ancestry (novel) and correlated meta-analysis (novel variants). The annotation of variants was sourced from NCBI dbSNP build 138 (hg19) during the analyses and updated to dbSNP build 150 (hg38) for reporting results. Abbreviations: Nb, order number based on SNVs; Position, dbSNP build 150 (hg38) annotation; Variant, single nucleotide variant (SNV); Ref, reference allele; Alt, alternative allele; AFR Freq, Freq of Ref in African ancestry; ASN Freq, Freq of Ref in East Asian ancestry; EUR Freq, Freq of Ref in European ancestry. * RegulomeDB scoring has classes defined as 1b, 1d and 1f: likely to affect binding and linked to expression of a gene target, with details: 1b (eQTL + TF binding + any motif + DNase footprint + DNase peak); 1d (eQTL + TF binding + any motif + DNase peak); 1f (eQTL + TF binding/DNase peak), 2a and 2b: likely to affect binding, 3a: less likely to affect binding, 4, 5, and 6: minimal binding evidence, and 7: no data. This software was accessed on 06.15.2017. Regulatory function measured by Promoter histone marks, Enhancer histone marks, DNase (DNAse hypersensitivity), Proteins bound, Motifs changed. (XLSX) [file pone.0198166.s034.xlsx]

## Sheet: S14 Table
S14 Table. Novel SNVs/genes associated with BP traits for eSNV/eQTL using GTEx. Target genes (Tissues and P-Values)
	A. Novel SNVs/Genes for BP
Nb	SNV	Chr138	HUGO 138 (hg19)	Chr150 (hg38)	Position 150 (hg38)	HUGO 150 (hg38)	P-Value for Stage 1 and Stage 2	RegulomeDB_score	Target Gene(s) (Tissue, P-Value)	Target Gene 1, eSNV regulating it	Best eSNV within Target Gene 1	r2 between 2 eSNVs (LD1)	Target Gene 2, eSNV regulating it	Best eSNV within Target Gene 2	r2 between 2 eSNVs (LD2)	Target Gene 3, eSNV regulating it	Best eSNV within Target Gene 3	r2 between 2 eSNVs (LD3)	Target Gene 4, eSNV regulating it	Best eSNV within Target Gene 4	r2 between 2 eSNVs (LD4)	Target Gene 5, eSNV regulating it	Best eSNV within Target Gene 5	r2 between 2 eSNVs (LD5)	Chr	Position (hg38)	Variant	Ref	Alt	AFR	AMR	ASN	EUR	GERP	SiPhy	Promoter	Enhancer	DNAse	Proteins	Motifs	NHGRI/EBI	GRASP QTL	Selected eQTL	GENCODE	RefSeq	dbSNP
																														freq	freq	freq	freq	cons	cons	histone marks	histone marks		bound	changed	GWAS hits	hits	hits	genes	genes	func annot
1	rs2979172	8310508	SGK223	8	8452998	LOC107986913	3.63e-18	5	SGK223(Thyroid,8.48E-48);FAM86B3P(Esophagus_Mucosa,5.79E-43);FAM86B3P(Cells_Transformed_fibroblasts,6.23E-38);CTA-398F10.2(Skin_Sun_Exposed_Lower_leg,1.19E-35);CTA-398F10.2(Skin_Not_Sun_Exposed_Suprapubic,1.87E-30);ALG1L13P(Cells_Transformed_fibroblasts,1.25E-23);FAM85B(Testis,3.06E-23);FAM86B3P(Adipose_Visceral_Omentum,1.02E-22);FAM85B(Nerve_Tibial,3.61E-21);ERI1(Cells_Transformed_fibroblasts,6.…	SGK223,rs2979172,8.48E-48	SGK223,rs2921053,1.04E-67,Thyroid	r2(rs2979172,rs2921053)=0.608	FAM86B3P,rs2979172,5.79E-43	FAM86B3P,rs2980439,1.26E-80,Cells_Transformed_fibroblasts	r2(rs2979172,rs2980439)=0.39	CTA-398F10.2,rs2979172,1.19E-35	CTA-398F10.2,rs2921057,2.76E-53,Skin_Sun_Exposed_Lower_leg	r2(rs2979172,rs2921057)=0.51	ALG1L13P,rs2979172,1.25E-23	ALG1L13P,rs2980439,1.65E-46,Cells_Transformed_fibroblasts	r2(rs2979172,rs2980439)=0.39	FAM85B,rs2979172,3.06E-23	FAM85B,rs2955581,2.15E-50,Testis	r2(rs2979172,rs2955581)=0.457	8	8452998	rs2979172	G	C	0.43	0.6	0.91	0.48				7 tissues	BLD,BLD,BLD		AP-1,E2A			22 hits	3.9kb 3' of CTA-398F10.2	71kb 5' of SGK223
2	rs876954	8310923	SGK223	8	8453413	LOC107986913	7.41e-18	7	SGK223(Thyroid,1.59E-50);CTA-398F10.2(Skin_Sun_Exposed_Lower_leg,3.83E-43);CTA-398F10.2(Skin_Not_Sun_Exposed_Suprapubic,3.08E-35);FAM86B3P(Cells_Transformed_fibroblasts,4.33E-34);FAM86B3P(Esophagus_Mucosa,4.94E-32);FAM85B(Testis,6.39E-23);ALG1L13P(Cells_Transformed_fibroblasts,4.62E-22);FAM85B(Nerve_Tibial,1.70E-20);ERI1(Cells_Transformed_fibroblasts,2.52E-20);FAM86B3P(Adipose_Visceral_Omentum,3.…	SGK223,rs876954,1.59E-50	SGK223,rs2921053,1.04E-67,Thyroid	r2(rs876954,rs2921053)=0.485	CTA-398F10.2,rs876954,3.83E-43	CTA-398F10.2,rs2921057,2.76E-53,Skin_Sun_Exposed_Lower_leg	r2(rs876954,rs2921057)=0.756	FAM86B3P,rs876954,4.33E-34	FAM86B3P,rs2980439,1.26E-80,Cells_Transformed_fibroblasts	r2(rs876954,rs2980439)=0.307	FAM85B,rs876954,6.39E-23	FAM85B,rs2955581,2.15E-50,Testis	r2(rs876954,rs2955581)=0.303	ALG1L13P,rs876954,4.62E-22	ALG1L13P,rs2980439,1.65E-46,Cells_Transformed_fibroblasts	r2(rs876954,rs2980439)=0.307	8	8453413	rs876954	G	A	0.72	0.62	0.91	0.48				7 tissues	BRN,BRN				1 hit	26 hits	3.5kb 3' of CTA-398F10.2	72kb 5' of SGK223
3	rs2921064	8316637	SGK223	8	8459127	LOC107986913	2.95e-16	7	SGK223(Thyroid,1.26E-51);CTA-398F10.2(Skin_Sun_Exposed_Lower_leg,5.35E-46);CTA-398F10.2(Skin_Not_Sun_Exposed_Suprapubic,2.99E-35);FAM86B3P(Esophagus_Mucosa,5.20E-33);FAM86B3P(Cells_Transformed_fibroblasts,1.38E-31);FAM85B(Testis,5.37E-22);ALG1L13P(Cells_Transformed_fibroblasts,5.03E-21);ERI1(Cells_Transformed_fibroblasts,1.43E-19);FAM86B3P(Adipose_Visceral_Omentum,3.13E-18);FAM85B(Nerve_Tibial,2.…	SGK223,rs2921064,1.26E-51	SGK223,rs2921053,1.04E-67,Thyroid	r2(rs2921064,rs2921053)=0.474	CTA-398F10.2,rs2921064,5.35E-46	CTA-398F10.2,rs2921057,2.76E-53,Skin_Sun_Exposed_Lower_leg	r2(rs2921064,rs2921057)=0.847	FAM86B3P,rs2921064,5.20E-33	FAM86B3P,rs2980439,1.26E-80,Cells_Transformed_fibroblasts	r2(rs2921064,rs2980439)=0.248	FAM85B,rs2921064,5.37E-22	FAM85B,rs2955581,2.15E-50,Testis	r2(rs2921064,rs2955581)=0.246	ALG1L13P,rs2921064,5.03E-21	ALG1L13P,rs2980439,1.65E-46,Cells_Transformed_fibroblasts	r2(rs2921064,rs2980439)=0.248	8	8459127	rs2921064	C	T	0.72	0.56	0.9	0.44				5 tissues						22 hits	CTA-398F10.2	77kb 5' of SGK223
4	rs2921061	8317615	SGK223	8	8460105	LOC107986913	6.03e-16	7	SGK223(Thyroid,2.93E-55);CTA-398F10.2(Skin_Sun_Exposed_Lower_leg,3.15E-52);CTA-398F10.2(Skin_Not_Sun_Exposed_Suprapubic,1.79E-41);FAM86B3P(Esophagus_Mucosa,7.89E-34);FAM86B3P(Cells_Transformed_fibroblasts,2.34E-30);CTA-398F10.2(Esophagus_Mucosa,1.27E-20);ERI1(Cells_Transformed_fibroblasts,6.99E-20);FAM85B(Testis,6.56E-19);ALG1L13P(Cells_Transformed_fibroblasts,8.95E-19);FAM86B3P(Adipose_Visceral_…	SGK223,rs2921061,2.93E-55	SGK223,rs2921053,1.04E-67,Thyroid	r2(rs2921061,rs2921053)=0.523	CTA-398F10.2,rs2921061,3.15E-52	CTA-398F10.2,rs2921057,2.76E-53,Skin_Sun_Exposed_Lower_leg	r2(rs2921061,rs2921057)=0.958	FAM86B3P,rs2921061,7.89E-34	FAM86B3P,rs2980439,1.26E-80,Cells_Transformed_fibroblasts	r2(rs2921061,rs2980439)=0.26	ERI1,rs2921061,6.99E-20	ERI1,rs2979256,1.19E-53,Cells_Transformed_fibroblasts	r2(rs2921061,rs2979256)=0.11	FAM85B,rs2921061,6.56E-19	FAM85B,rs2955581,2.15E-50,Testis	r2(rs2921061,rs2955581)=0.25	8	8460105	rs2921061	A	T	0.74	0.57	0.9	0.45				4 tissues			GATA			21 hits	CTA-398F10.2	78kb 5' of SGK223
5	rs2921060	8317817	SGK223	8	8460307	LOC107986913	8.13e-16	6	SGK223(Thyroid,3.96E-52);CTA-398F10.2(Skin_Sun_Exposed_Lower_leg,7.77E-44);CTA-398F10.2(Skin_Not_Sun_Exposed_Suprapubic,1.02E-34);FAM86B3P(Esophagus_Mucosa,4.56E-34);FAM86B3P(Cells_Transformed_fibroblasts,1.30E-29);ERI1(Cells_Transformed_fibroblasts,1.01E-19);CTA-398F10.2(Esophagus_Mucosa,1.12E-19);FAM85B(Testis,3.43E-19);ALG1L13P(Cells_Transformed_fibroblasts,1.10E-18);FAM86B3P(Adipose_Visceral_…	SGK223,rs2921060,3.96E-52	SGK223,rs2921053,1.04E-67,Thyroid	r2(rs2921060,rs2921053)=0.542	CTA-398F10.2,rs2921060,7.77E-44	CTA-398F10.2,rs2921057,2.76E-53,Skin_Sun_Exposed_Lower_leg	r2(rs2921060,rs2921057)=0.794	FAM86B3P,rs2921060,4.56E-34	FAM86B3P,rs2980439,1.26E-80,Cells_Transformed_fibroblasts	r2(rs2921060,rs2980439)=0.298	ERI1,rs2921060,1.01E-19	ERI1,rs2979256,1.19E-53,Cells_Transformed_fibroblasts	r2(rs2921060,rs2979256)=0.15	FAM85B,rs2921060,3.43E-19	FAM85B,rs2955581,2.15E-50,Testis	r2(rs2921060,rs2955581)=0.315	8	8460307	rs2921060	A	C	0.64	0.56	0.9	0.45				5 tissues			Hbp1		5 hits	24 hits	CTA-398F10.2	79kb 5' of SGK223
6	rs2980766	8318095	SGK223	8	8460585	LOC107986913	3.55e-16	7	SGK223(Thyroid,2.86E-55);CTA-398F10.2(Skin_Sun_Exposed_Lower_leg,7.57E-52);CTA-398F10.2(Skin_Not_Sun_Exposed_Suprapubic,2.16E-41);FAM86B3P(Esophagus_Mucosa,8.30E-34);FAM86B3P(Cells_Transformed_fibroblasts,2.14E-30);CTA-398F10.2(Esophagus_Mucosa,1.38E-20);ERI1(Cells_Transformed_fibroblasts,2.81E-20);FAM85B(Testis,6.72E-19);ALG1L13P(Cells_Transformed_fibroblasts,8.02E-19);FAM86B3P(Adipose_Visceral_…	SGK223,rs2980766,2.86E-55	SGK223,rs2921053,1.04E-67,Thyroid	r2(rs2980766,rs2921053)=0.523	CTA-398F10.2,rs2980766,7.57E-52	CTA-398F10.2,rs2921057,2.76E-53,Skin_Sun_Exposed_Lower_leg	r2(rs2980766,rs2921057)=0.959	FAM86B3P,rs2980766,8.30E-34	FAM86B3P,rs2980439,1.26E-80,Cells_Transformed_fibroblasts	r2(rs2980766,rs2980439)=0.259	ERI1,rs2980766,2.81E-20	ERI1,rs2979256,1.19E-53,Cells_Transformed_fibroblasts	r2(rs2980766,rs2979256)=0.11	FAM85B,rs2980766,6.72E-19	FAM85B,rs2955581,2.15E-50,Testis	r2(rs2980766,rs2955581)=0.25	8	8460585	rs2980766	T	C	0.73	0.57	0.89	0.44				5 tissues			Hic1,NRSF,Zic			22 hits	CTA-398F10.2	79kb 5' of SGK223
7	rs2921057	8318667	SGK223	8	8461157	LOC107986913	2.24e-16	4	SGK223(Thyroid,3.08E-56);CTA-398F10.2(Skin_Sun_Exposed_Lower_leg,2.76E-53);CTA-398F10.2(Skin_Not_Sun_Exposed_Suprapubic,1.54E-42);FAM86B3P(Esophagus_Mucosa,1.21E-33);FAM86B3P(Cells_Transformed_fibroblasts,6.77E-31);ERI1(Cells_Transformed_fibroblasts,2.71E-21);CTA-398F10.2(Esophagus_Mucosa,6.53E-21);ALG1L13P(Cells_Transformed_fibroblasts,2.04E-19);FAM85B(Testis,6.45E-19);FAM86B3P(Adipose_Visceral_…	SGK223,rs2921057,3.08E-56	SGK223,rs2921053,1.04E-67,Thyroid	r2(rs2921057,rs2921053)=0.536	CTA-398F10.2,rs2921057,2.76E-53	CTA-398F10.2,rs2921057,2.76E-53,Skin_Sun_Exposed_Lower_leg	r2(rs2921057,rs2921057)=1	FAM86B3P,rs2921057,1.21E-33	FAM86B3P,rs2980439,1.26E-80,Cells_Transformed_fibroblasts	r2(rs2921057,rs2980439)=0.269	ERI1,rs2921057,2.71E-21	ERI1,rs2979256,1.19E-53,Cells_Transformed_fibroblasts	r2(rs2921057,rs2979256)=0.119	ALG1L13P,rs2921057,2.04E-19	ALG1L13P,rs2980439,1.65E-46,Cells_Transformed_fibroblasts	r2(rs2921057,rs2980439)=0.269	8	8461157	rs2921057	C	T	0.74	0.59	0.9	0.46			GI, BLD	8 tissues	5 tissues		MZF1::1-4,Spz1			21 hits	CTA-398F10.2	79kb 5' of SGK223
8	rs2976876	8318850	SGK223	8	8461340	LOC107986913	1.29e-14	3a	SGK223(Thyroid,1.30E-65);FAM86B3P(Cells_Transformed_fibroblasts,9.65E-31);CTA-398F10.2(Skin_Sun_Exposed_Lower_leg,9.20E-30);FAM86B3P(Esophagus_Mucosa,1.26E-28);CTA-398F10.2(Thyroid,7.88E-28);CTA-398F10.2(Skin_Not_Sun_Exposed_Suprapubic,4.45E-23);ERI1(Cells_Transformed_fibroblasts,1.25E-21);ALG1L13P(Cells_Transformed_fibroblasts,1.63E-21);FAM85B(Nerve_Tibial,3.19E-19);FAM85B(Testis,2.39E-18);RP11-…	SGK223,rs2976876,1.30E-65	SGK223,rs2921053,1.04E-67,Thyroid	r2(rs2976876,rs2921053)=0.933	FAM86B3P,rs2976876,9.65E-31	FAM86B3P,rs2980439,1.26E-80,Cells_Transformed_fibroblasts	r2(rs2976876,rs2980439)=0.328	CTA-398F10.2,rs2976876,9.20E-30	CTA-398F10.2,rs2921057,2.76E-53,Skin_Sun_Exposed_Lower_leg	r2(rs2976876,rs2921057)=0.605	ERI1,rs2976876,1.25E-21	ERI1,rs2979256,1.19E-53,Cells_Transformed_fibroblasts	r2(rs2976876,rs2979256)=0.203	ALG1L13P,rs2976876,1.63E-21	ALG1L13P,rs2980439,1.65E-46,Cells_Transformed_fibroblasts	r2(rs2976876,rs2980439)=0.328	8	8461340	rs2976876	T	C	0.41	0.56	0.9	0.42			BLD	9 tissues	11 tissues	ERALPHA_A,FOXA1,P300	MAZ,NRSF,Rad21		2 hits	26 hits	2bp 5' of CTA-398F10.2	80kb 5' of SGK223
9	rs2921056	8319182	SGK223	8	8461672	LOC107986913	1.7e-15	3a	SGK223(Thyroid,1.30E-65);FAM86B3P(Cells_Transformed_fibroblasts,9.65E-31);CTA-398F10.2(Skin_Sun_Exposed_Lower_leg,9.20E-30);FAM86B3P(Esophagus_Mucosa,1.26E-28);CTA-398F10.2(Thyroid,7.88E-28);CTA-398F10.2(Skin_Not_Sun_Exposed_Suprapubic,4.45E-23);ERI1(Cells_Transformed_fibroblasts,1.25E-21);ALG1L13P(Cells_Transformed_fibroblasts,1.63E-21);FAM85B(Nerve_Tibial,3.19E-19);FAM85B(Testis,2.39E-18);RP11-…	SGK223,rs2921056,1.30E-65	SGK223,rs2921053,1.04E-67,Thyroid	r2(rs2921056,rs2921053)=0.934	FAM86B3P,rs2921056,9.65E-31	FAM86B3P,rs2980439,1.26E-80,Cells_Transformed_fibroblasts	r2(rs2921056,rs2980439)=0.327	CTA-398F10.2,rs2921056,9.20E-30	CTA-398F10.2,rs2921057,2.76E-53,Skin_Sun_Exposed_Lower_leg	r2(rs2921056,rs2921057)=0.604	ERI1,rs2921056,1.25E-21	ERI1,rs2979256,1.19E-53,Cells_Transformed_fibroblasts	r2(rs2921056,rs2979256)=0.203	ALG1L13P,rs2921056,1.63E-21	ALG1L13P,rs2980439,1.65E-46,Cells_Transformed_fibroblasts	r2(rs2921056,rs2980439)=0.327	8	8461672	rs2921056	T	C	0.42	0.56	0.9	0.42			BLD, LIV	11 tissues	7 tissues	ERALPHA_A,FOXA1	TAL1			21 hits	334bp 5' of CTA-398F10.2	80kb 5' of SGK223
10	rs2921053	8319963	SGK223	8	8462453	LOC107986913	6.46e-17	5	SGK223(Thyroid,1.04E-67);FAM86B3P(Cells_Transformed_fibroblasts,1.47E-36);FAM86B3P(Esophagus_Mucosa,1.50E-30);CTA-398F10.2(Thyroid,5.54E-30);ALG1L13P(Cells_Transformed_fibroblasts,9.82E-26);CTA-398F10.2(Skin_Sun_Exposed_Lower_leg,1.38E-25);FAM85B(Testis,2.08E-24);FAM85B(Nerve_Tibial,7.72E-23);ERI1(Cells_Transformed_fibroblasts,1.92E-22);CTA-398F10.2(Skin_Not_Sun_Exposed_Suprapubic,2.56E-21);FAM86…	SGK223,rs2921053,1.04E-67	SGK223,rs2921053,1.04E-67,Thyroid	r2(rs2921053,rs2921053)=1	FAM86B3P,rs2921053,1.47E-36	FAM86B3P,rs2980439,1.26E-80,Cells_Transformed_fibroblasts	r2(rs2921053,rs2980439)=0.342	CTA-398F10.2,rs2921053,5.54E-30	CTA-398F10.2,rs2921057,2.76E-53,Skin_Sun_Exposed_Lower_leg	r2(rs2921053,rs2921057)=0.536	ALG1L13P,rs2921053,9.82E-26	ALG1L13P,rs2980439,1.65E-46,Cells_Transformed_fibroblasts	r2(rs2921053,rs2980439)=0.342	FAM85B,rs2921053,2.08E-24	FAM85B,rs2955581,2.15E-50,Testis	r2(rs2921053,rs2955581)=0.396	8	8462453	rs2921053	G	C	0.42	0.58	0.91	0.45				6 tissues	IPSC,GI		5 altered motifs			22 hits	1.1kb 5' of CTA-398F10.2	81kb 5' of SGK223
11	rs2979179	8320029	SGK223	8	8462519	LOC107986913	1.59e-15	1f	SGK223(Thyroid,2.10E-65);FAM86B3P(Cells_Transformed_fibroblasts,2.53E-30);CTA-398F10.2(Skin_Sun_Exposed_Lower_leg,2.62E-29);FAM86B3P(Esophagus_Mucosa,9.25E-28);CTA-398F10.2(Thyroid,2.77E-27);CTA-398F10.2(Skin_Not_Sun_Exposed_Suprapubic,5.77E-23);ERI1(Cells_Transformed_fibroblasts,1.75E-22);ALG1L13P(Cells_Transformed_fibroblasts,2.91E-21);FAM85B(Nerve_Tibial,1.37E-18);FAM85B(Testis,4.02E-18);RP11-…	SGK223,rs2979179,2.10E-65	SGK223,rs2921053,1.04E-67,Thyroid	r2(rs2979179,rs2921053)=0.932	FAM86B3P,rs2979179,2.53E-30	FAM86B3P,rs2980439,1.26E-80,Cells_Transformed_fibroblasts	r2(rs2979179,rs2980439)=0.324	CTA-398F10.2,rs2979179,2.62E-29	CTA-398F10.2,rs2921057,2.76E-53,Skin_Sun_Exposed_Lower_leg	r2(rs2979179,rs2921057)=0.601	ERI1,rs2979179,1.75E-22	ERI1,rs2979256,1.19E-53,Cells_Transformed_fibroblasts	r2(rs2979179,rs2979256)=0.202	ALG1L13P,rs2979179,2.91E-21	ALG1L13P,rs2980439,1.65E-46,Cells_Transformed_fibroblasts	r2(rs2979179,rs2980439)=0.324	8	8462519	rs2979179	G	A	0.41	0.56	0.89	0.42				6 tissues			ATF3,Crx,HEY1		4 hits	21 hits	1.2kb 5' of CTA-398F10.2	81kb 5' of SGK223
12	rs2921051	8320104	SGK223	8	8462594	LOC107986913	1.86e-16	7	SGK223(Thyroid,2.92E-54);CTA-398F10.2(Skin_Sun_Exposed_Lower_leg,2.88E-43);CTA-398F10.2(Skin_Not_Sun_Exposed_Suprapubic,3.85E-35);FAM86B3P(Esophagus_Mucosa,1.38E-33);FAM86B3P(Cells_Transformed_fibroblasts,1.90E-32);ERI1(Cells_Transformed_fibroblasts,3.28E-21);ALG1L13P(Cells_Transformed_fibroblasts,1.61E-20);FAM86B3P(Adipose_Visceral_Omentum,4.51E-20);FAM85B(Testis,1.87E-19);FAM85B(Nerve_Tibial,3.…	SGK223,rs2921051,2.92E-54	SGK223,rs2921053,1.04E-67,Thyroid	r2(rs2921051,rs2921053)=0.749	CTA-398F10.2,rs2921051,2.88E-43	CTA-398F10.2,rs2921057,2.76E-53,Skin_Sun_Exposed_Lower_leg	r2(rs2921051,rs2921057)=0.732	FAM86B3P,rs2921051,1.38E-33	FAM86B3P,rs2980439,1.26E-80,Cells_Transformed_fibroblasts	r2(rs2921051,rs2980439)=0.309	ERI1,rs2921051,3.28E-21	ERI1,rs2979256,1.19E-53,Cells_Transformed_fibroblasts	r2(rs2921051,rs2979256)=0.181	ALG1L13P,rs2921051,1.61E-20	ALG1L13P,rs2980439,1.65E-46,Cells_Transformed_fibroblasts	r2(rs2921051,rs2980439)=0.309	8	8462594	rs2921051	C	A	0.53	0.57	0.89	0.45				6 tissues			LUN-1			23 hits	1.3kb 5' of CTA-398F10.2	81kb 5' of SGK223
13	rs2979181	8323088	SGK223	8	8465578	LOC107986913	7.41e-18	5	SGK223(Thyroid,4.46E-59);CTA-398F10.2(Skin_Sun_Exposed_Lower_leg,9.62E-47);CTA-398F10.2(Skin_Not_Sun_Exposed_Suprapubic,3.49E-40);FAM86B3P(Cells_Transformed_fibroblasts,8.44E-38);FAM86B3P(Esophagus_Mucosa,1.20E-37);FAM85B(Testis,1.30E-25);ALG1L13P(Cells_Transformed_fibroblasts,1.35E-23);FAM86B3P(Adipose_Visceral_Omentum,8.07E-22);ERI1(Cells_Transformed_fibroblasts,1.90E-21);FAM85B(Nerve_Tibial,5.…	SGK223,rs2979181,4.46E-59	SGK223,rs2921053,1.04E-67,Thyroid	r2(rs2979181,rs2921053)=0.564	CTA-398F10.2,rs2979181,9.62E-47	CTA-398F10.2,rs2921057,2.76E-53,Skin_Sun_Exposed_Lower_leg	r2(rs2979181,rs2921057)=0.869	FAM86B3P,rs2979181,8.44E-38	FAM86B3P,rs2980439,1.26E-80,Cells_Transformed_fibroblasts	r2(rs2979181,rs2980439)=0.276	FAM85B,rs2979181,1.30E-25	FAM85B,rs2955581,2.15E-50,Testis	r2(rs2979181,rs2955581)=0.269	ALG1L13P,rs2979181,1.35E-23	ALG1L13P,rs2980439,1.65E-46,Cells_Transformed_fibroblasts	r2(rs2979181,rs2980439)=0.276	8	8465578	rs2979181	A	T	0.75	0.61	0.92	0.48				4 tissues	BLD,BRST	MAFF,MAFK	Maf			25 hits	4.2kb 5' of CTA-398F10.2	84kb 5' of SGK223
14	rs2980755	8363683	SGK223	8	8506173	LOC107986913	5.62e-18	7	FAM86B3P(Cells_Transformed_fibroblasts,2.63E-36);FAM86B3P(Esophagus_Mucosa,2.80E-35);SGK223(Thyroid,6.50E-35);CTA-398F10.2(Skin_Sun_Exposed_Lower_leg,5.55E-32);CTA-398F10.2(Skin_Not_Sun_Exposed_Suprapubic,2.26E-25);ALG1L13P(Cells_Transformed_fibroblasts,1.07E-24);FAM85B(Testis,3.31E-22);ERI1(Cells_Transformed_fibroblasts,8.34E-18);FAM86B3P(Adipose_Visceral_Omentum,8.42E-18);ALG1L13P(Esophagus_Muc…	FAM86B3P,rs2980755,2.63E-36	FAM86B3P,rs2980439,1.26E-80,Cells_Transformed_fibroblasts	r2(rs2980755,rs2980439)=0.242	SGK223,rs2980755,6.50E-35	SGK223,rs2921053,1.04E-67,Thyroid	r2(rs2980755,rs2921053)=0.297	CTA-398F10.2,rs2980755,5.55E-32	CTA-398F10.2,rs2921057,2.76E-53,Skin_Sun_Exposed_Lower_leg	r2(rs2980755,rs2921057)=0.271	ALG1L13P,rs2980755,1.07E-24	ALG1L13P,rs2980439,1.65E-46,Cells_Transformed_fibroblasts	r2(rs2980755,rs2980439)=0.242	FAM85B,rs2980755,3.31E-22	FAM85B,rs2955581,2.15E-50,Testis	r2(rs2980755,rs2955581)=0.266	8	8506173	rs2980755	A	G	0.46	0.47	0.67	0.47				IPSC			4 altered motifs			27 hits	45kb 5' of CTA-398F10.2	124kb 5' of SGK223
15	rs10092965	8373485	SGK223	8	8515975	LOC105379224	6.92e-18	7	SGK223(Thyroid,7.44E-33);FAM86B3P(Cells_Transformed_fibroblasts,1.42E-32);FAM86B3P(Esophagus_Mucosa,1.25E-31);CTA-398F10.2(Skin_Not_Sun_Exposed_Suprapubic,1.75E-26);CTA-398F10.2(Skin_Sun_Exposed_Lower_leg,5.67E-25);FAM85B(Testis,3.23E-23);ALG1L13P(Cells_Transformed_fibroblasts,2.11E-20);FAM86B3P(Adipose_Visceral_Omentum,1.32E-18);ERI1(Cells_Transformed_fibroblasts,2.60E-18);FAM85B(Nerve_Tibial,5.…	SGK223,rs10092965,7.44E-33	SGK223,rs2921053,1.04E-67,Thyroid	r2(rs10092965,rs2921053)=0.54	FAM86B3P,rs10092965,1.42E-32	FAM86B3P,rs2980439,1.26E-80,Cells_Transformed_fibroblasts	r2(rs10092965,rs2980439)=0.355	CTA-398F10.2,rs10092965,1.75E-26	CTA-398F10.2,rs2921057,2.76E-53,Skin_Sun_Exposed_Lower_leg	r2(rs10092965,rs2921057)=0.339	FAM85B,rs10092965,3.23E-23	FAM85B,rs2955581,2.15E-50,Testis	r2(rs10092965,rs2955581)=0.423	ALG1L13P,rs10092965,2.11E-20	ALG1L13P,rs2980439,1.65E-46,Cells_Transformed_fibroblasts	r2(rs10092965,rs2980439)=0.355	8	8515975	rs10092965	A	G	0.21	0.55	0.88	0.45							ERalpha-a,SREBP,Sox			27 hits	40kb 3' of CTD-3023L14.3	134kb 5' of SGK223
16	rs10087493	8373557	SGK223	8	8516047	LOC105379224	4.17e-18	6	SGK223(Thyroid,7.44E-33);FAM86B3P(Cells_Transformed_fibroblasts,1.42E-32);FAM86B3P(Esophagus_Mucosa,1.25E-31);CTA-398F10.2(Skin_Not_Sun_Exposed_Suprapubic,1.75E-26);CTA-398F10.2(Skin_Sun_Exposed_Lower_leg,5.67E-25);FAM85B(Testis,3.23E-23);ALG1L13P(Cells_Transformed_fibroblasts,2.11E-20);FAM86B3P(Adipose_Visceral_Omentum,1.32E-18);ERI1(Cells_Transformed_fibroblasts,2.60E-18);FAM85B(Nerve_Tibial,5.…	SGK223,rs10087493,7.44E-33	SGK223,rs2921053,1.04E-67,Thyroid	r2(rs10087493,rs2921053)=0.54	FAM86B3P,rs10087493,1.42E-32	FAM86B3P,rs2980439,1.26E-80,Cells_Transformed_fibroblasts	r2(rs10087493,rs2980439)=0.355	CTA-398F10.2,rs10087493,1.75E-26	CTA-398F10.2,rs2921057,2.76E-53,Skin_Sun_Exposed_Lower_leg	r2(rs10087493,rs2921057)=0.338	FAM85B,rs10087493,3.23E-23	FAM85B,rs2955581,2.15E-50,Testis	r2(rs10087493,rs2955581)=0.424	ALG1L13P,rs10087493,2.11E-20	ALG1L13P,rs2980439,1.65E-46,Cells_Transformed_fibroblasts	r2(rs10087493,rs2980439)=0.355	8	8516047	rs10087493	C	T	0.21	0.55	0.88	0.45							Eomes		3 hits	26 hits	40kb 3' of CTD-3023L14.3	134kb 5' of SGK223
17	rs7010753	8373956	SGK223	8	8516446	LOC105379224	4.37e-18	6	SGK223(Thyroid,2.20E-33);FAM86B3P(Cells_Transformed_fibroblasts,5.86E-33);FAM86B3P(Esophagus_Mucosa,1.92E-31);CTA-398F10.2(Skin_Not_Sun_Exposed_Suprapubic,1.67E-26);CTA-398F10.2(Skin_Sun_Exposed_Lower_leg,3.76E-25);FAM85B(Testis,1.09E-23);ALG1L13P(Cells_Transformed_fibroblasts,1.52E-20);ERI1(Cells_Transformed_fibroblasts,6.60E-19);FAM86B3P(Adipose_Visceral_Omentum,9.54E-18);FAM85B(Nerve_Tibial,4.…	SGK223,rs7010753,2.20E-33	SGK223,rs2921053,1.04E-67,Thyroid	r2(rs7010753,rs2921053)=0.538	FAM86B3P,rs7010753,5.86E-33	FAM86B3P,rs2980439,1.26E-80,Cells_Transformed_fibroblasts	r2(rs7010753,rs2980439)=0.357	CTA-398F10.2,rs7010753,1.67E-26	CTA-398F10.2,rs2921057,2.76E-53,Skin_Sun_Exposed_Lower_leg	r2(rs7010753,rs2921057)=0.337	FAM85B,rs7010753,1.09E-23	FAM85B,rs2955581,2.15E-50,Testis	r2(rs7010753,rs2955581)=0.425	ALG1L13P,rs7010753,1.52E-20	ALG1L13P,rs2980439,1.65E-46,Cells_Transformed_fibroblasts	r2(rs7010753,rs2980439)=0.357	8	8516446	rs7010753	A	G	0.21	0.55	0.88	0.44				4 tissues			Hsf,Pou2f2			26 hits	39kb 3' of CTD-3023L14.3	135kb 5' of SGK223
18	rs13270194	8378102	SGK223	8	8520592	LOC105379224	2.34e-20	7	SGK223(Thyroid,2.42E-37);FAM86B3P(Cells_Transformed_fibroblasts,1.34E-32);CTA-398F10.2(Skin_Not_Sun_Exposed_Suprapubic,9.34E-30);CTA-398F10.2(Skin_Sun_Exposed_Lower_leg,1.73E-29);FAM86B3P(Esophagus_Mucosa,1.75E-29);FAM85B(Testis,2.12E-26);ERI1(Cells_Transformed_fibroblasts,5.90E-22);ALG1L13P(Cells_Transformed_fibroblasts,1.39E-20);FAM86B3P(Adipose_Visceral_Omentum,9.39E-18);FAM85B(Nerve_Tibial,2.…	SGK223,rs13270194,2.42E-37	SGK223,rs2921053,1.04E-67,Thyroid	r2(rs13270194,rs2921053)=0.439	FAM86B3P,rs13270194,1.34E-32	FAM86B3P,rs2980439,1.26E-80,Cells_Transformed_fibroblasts	r2(rs13270194,rs2980439)=0.275	CTA-398F10.2,rs13270194,9.34E-30	CTA-398F10.2,rs2921057,2.76E-53,Skin_Sun_Exposed_Lower_leg	r2(rs13270194,rs2921057)=0.531	FAM85B,rs13270194,2.12E-26	FAM85B,rs2955581,2.15E-50,Testis	r2(rs13270194,rs2955581)=0.291	ERI1,rs13270194,5.90E-22	ERI1,rs2979256,1.19E-53,Cells_Transformed_fibroblasts	r2(rs13270194,rs2979256)=0.146	8	8520592	rs13270194	T	C	0.63	0.61	0.88	0.49				BRST, BLD, SKIN	BLD,LNG		Pax-4,SREBP,Zic			23 hits	35kb 3' of CTD-3023L14.3	139kb 5' of SGK223
19	rs7837587	8378992	SGK223	8	8521482	LOC105379224	1.62e-19	7	SGK223(Thyroid,2.44E-37);FAM86B3P(Cells_Transformed_fibroblasts,1.34E-32);CTA-398F10.2(Skin_Not_Sun_Exposed_Suprapubic,9.54E-30);CTA-398F10.2(Skin_Sun_Exposed_Lower_leg,1.72E-29);FAM86B3P(Esophagus_Mucosa,1.75E-29);FAM85B(Testis,2.05E-26);ERI1(Cells_Transformed_fibroblasts,5.90E-22);ALG1L13P(Cells_Transformed_fibroblasts,1.39E-20);FAM86B3P(Adipose_Visceral_Omentum,9.53E-18);FAM85B(Nerve_Tibial,2.…	SGK223,rs7837587,2.44E-37	SGK223,rs2921053,1.04E-67,Thyroid	r2(rs7837587,rs2921053)=0.424	FAM86B3P,rs7837587,1.34E-32	FAM86B3P,rs2980439,1.26E-80,Cells_Transformed_fibroblasts	r2(rs7837587,rs2980439)=0.268	CTA-398F10.2,rs7837587,9.54E-30	CTA-398F10.2,rs2921057,2.76E-53,Skin_Sun_Exposed_Lower_leg	r2(rs7837587,rs2921057)=0.516	FAM85B,rs7837587,2.05E-26	FAM85B,rs2955581,2.15E-50,Testis	r2(rs7837587,rs2955581)=0.282	ERI1,rs7837587,5.90E-22	ERI1,rs2979256,1.19E-53,Cells_Transformed_fibroblasts	r2(rs7837587,rs2979256)=0.14	8	8521482	rs7837587	T	C	0.62	0.61	0.88	0.49				BRST, SKIN	THYM,BLD		4 altered motifs		2 hits	27 hits	34kb 3' of CTD-3023L14.3	140kb 5' of SGK223
20	rs7009054	8379514	SGK223	8	8522004	LOC105379224	6.17e-19	7	SGK223(Thyroid,3.30E-34);FAM86B3P(Cells_Transformed_fibroblasts,3.81E-33);FAM86B3P(Esophagus_Mucosa,1.67E-30);CTA-398F10.2(Skin_Sun_Exposed_Lower_leg,7.40E-29);CTA-398F10.2(Skin_Not_Sun_Exposed_Suprapubic,1.60E-28);FAM85B(Testis,1.89E-25);ERI1(Cells_Transformed_fibroblasts,1.33E-21);ALG1L13P(Cells_Transformed_fibroblasts,7.49E-21);FAM86B3P(Adipose_Visceral_Omentum,2.29E-18);FAM85B(Nerve_Tibial,3.…	SGK223,rs7009054,3.30E-34	SGK223,rs2921053,1.04E-67,Thyroid	r2(rs7009054,rs2921053)=0.423	FAM86B3P,rs7009054,3.81E-33	FAM86B3P,rs2980439,1.26E-80,Cells_Transformed_fibroblasts	r2(rs7009054,rs2980439)=0.267	CTA-398F10.2,rs7009054,7.40E-29	CTA-398F10.2,rs2921057,2.76E-53,Skin_Sun_Exposed_Lower_leg	r2(rs7009054,rs2921057)=0.515	FAM85B,rs7009054,1.89E-25	FAM85B,rs2955581,2.15E-50,Testis	r2(rs7009054,rs2955581)=0.281	ERI1,rs7009054,1.33E-21	ERI1,rs2979256,1.19E-53,Cells_Transformed_fibroblasts	r2(rs7009054,rs2979256)=0.139	8	8522004	rs7009054	T	C	0.58	0.59	0.88	0.49				BRST, SKIN, PLCNT						23 hits	34kb 3' of CTD-3023L14.3	140kb 5' of SGK223
21	rs6601703	8380224	SGK223	8	8522714	LOC105379224	2.19e-20	3a	SGK223(Thyroid,2.44E-37);FAM86B3P(Cells_Transformed_fibroblasts,1.34E-32);CTA-398F10.2(Skin_Not_Sun_Exposed_Suprapubic,9.54E-30);CTA-398F10.2(Skin_Sun_Exposed_Lower_leg,1.72E-29);FAM86B3P(Esophagus_Mucosa,1.75E-29);FAM85B(Testis,2.05E-26);ERI1(Cells_Transformed_fibroblasts,5.90E-22);ALG1L13P(Cells_Transformed_fibroblasts,1.39E-20);FAM86B3P(Adipose_Visceral_Omentum,9.53E-18);FAM85B(Nerve_Tibial,2.…	SGK223,rs6601703,2.44E-37	SGK223,rs2921053,1.04E-67,Thyroid	r2(rs6601703,rs2921053)=0.425	FAM86B3P,rs6601703,1.34E-32	FAM86B3P,rs2980439,1.26E-80,Cells_Transformed_fibroblasts	r2(rs6601703,rs2980439)=0.269	CTA-398F10.2,rs6601703,9.54E-30	CTA-398F10.2,rs2921057,2.76E-53,Skin_Sun_Exposed_Lower_leg	r2(rs6601703,rs2921057)=0.517	FAM85B,rs6601703,2.05E-26	FAM85B,rs2955581,2.15E-50,Testis	r2(rs6601703,rs2955581)=0.284	ERI1,rs6601703,5.90E-22	ERI1,rs2979256,1.19E-53,Cells_Transformed_fibroblasts	r2(rs6601703,rs2979256)=0.14	8	8522714	rs6601703	A	G	0.62	0.61	0.88	0.49			SKIN	8 tissues	7 tissues	GATA2	Bcl6b			23 hits	33kb 3' of CTD-3023L14.3	141kb 5' of SGK223
22	rs7827182	8380471	SGK223	8	8522961	LOC105379224	5.01e-20	6	SGK223(Thyroid,1.24E-35);FAM86B3P(Cells_Transformed_fibroblasts,1.34E-32);CTA-398F10.2(Skin_Not_Sun_Exposed_Suprapubic,3.48E-29);FAM86B3P(Esophagus_Mucosa,5.67E-29);CTA-398F10.2(Skin_Sun_Exposed_Lower_leg,7.53E-29);FAM85B(Testis,5.86E-26);ERI1(Cells_Transformed_fibroblasts,5.90E-22);ALG1L13P(Cells_Transformed_fibroblasts,1.39E-20);FAM85B(Nerve_Tibial,2.85E-17);FAM86B3P(Adipose_Visceral_Omentum,3.…	SGK223,rs7827182,1.24E-35	SGK223,rs2921053,1.04E-67,Thyroid	r2(rs7827182,rs2921053)=0.425	FAM86B3P,rs7827182,1.34E-32	FAM86B3P,rs2980439,1.26E-80,Cells_Transformed_fibroblasts	r2(rs7827182,rs2980439)=0.27	CTA-398F10.2,rs7827182,3.48E-29	CTA-398F10.2,rs2921057,2.76E-53,Skin_Sun_Exposed_Lower_leg	r2(rs7827182,rs2921057)=0.517	FAM85B,rs7827182,5.86E-26	FAM85B,rs2955581,2.15E-50,Testis	r2(rs7827182,rs2955581)=0.284	ERI1,rs7827182,5.90E-22	ERI1,rs2979256,1.19E-53,Cells_Transformed_fibroblasts	r2(rs7827182,rs2979256)=0.139	8	8522961	rs7827182	G	C	0.62	0.6	0.88	0.49				7 tissues	SKIN,GI				4 hits	23 hits	33kb 3' of CTD-3023L14.3	141kb 5' of SGK223
23	rs7817376	8380530	SGK223	8	8523020	LOC105379224	3.89e-20	6	SGK223(Thyroid,2.44E-37);FAM86B3P(Cells_Transformed_fibroblasts,1.34E-32);CTA-398F10.2(Skin_Not_Sun_Exposed_Suprapubic,9.54E-30);CTA-398F10.2(Skin_Sun_Exposed_Lower_leg,1.72E-29);FAM86B3P(Esophagus_Mucosa,1.75E-29);FAM85B(Testis,2.05E-26);ERI1(Cells_Transformed_fibroblasts,5.90E-22);ALG1L13P(Cells_Transformed_fibroblasts,1.39E-20);FAM86B3P(Adipose_Visceral_Omentum,9.53E-18);FAM85B(Nerve_Tibial,2.…	SGK223,rs7817376,2.44E-37	SGK223,rs2921053,1.04E-67,Thyroid	r2(rs7817376,rs2921053)=0.426	FAM86B3P,rs7817376,1.34E-32	FAM86B3P,rs2980439,1.26E-80,Cells_Transformed_fibroblasts	r2(rs7817376,rs2980439)=0.269	CTA-398F10.2,rs7817376,9.54E-30	CTA-398F10.2,rs2921057,2.76E-53,Skin_Sun_Exposed_Lower_leg	r2(rs7817376,rs2921057)=0.518	FAM85B,rs7817376,2.05E-26	FAM85B,rs2955581,2.15E-50,Testis	r2(rs7817376,rs2955581)=0.283	ERI1,rs7817376,5.90E-22	ERI1,rs2979256,1.19E-53,Cells_Transformed_fibroblasts	r2(rs7817376,rs2979256)=0.14	8	8523020	rs7817376	T	C	0.62	0.61	0.88	0.49				7 tissues	SKIN,VAS		6 altered motifs		4 hits	24 hits	33kb 3' of CTD-3023L14.3	141kb 5' of SGK223
24	rs7823056	8382705	SGK223	8	8525195	LOC105379224	1.07e-19	7	SGK223(Thyroid,4.41E-35);FAM86B3P(Cells_Transformed_fibroblasts,2.32E-33);FAM86B3P(Esophagus_Mucosa,7.67E-31);CTA-398F10.2(Skin_Sun_Exposed_Lower_leg,1.09E-29);CTA-398F10.2(Skin_Not_Sun_Exposed_Suprapubic,7.33E-28);FAM85B(Testis,2.93E-25);ALG1L13P(Cells_Transformed_fibroblasts,1.02E-21);ERI1(Cells_Transformed_fibroblasts,1.02E-20);FAM86B3P(Adipose_Visceral_Omentum,1.44E-18);FAM85B(Nerve_Tibial,1.…	SGK223,rs7823056,4.41E-35	SGK223,rs2921053,1.04E-67,Thyroid	r2(rs7823056,rs2921053)=0.417	FAM86B3P,rs7823056,2.32E-33	FAM86B3P,rs2980439,1.26E-80,Cells_Transformed_fibroblasts	r2(rs7823056,rs2980439)=0.307	CTA-398F10.2,rs7823056,1.09E-29	CTA-398F10.2,rs2921057,2.76E-53,Skin_Sun_Exposed_Lower_leg	r2(rs7823056,rs2921057)=0.454	FAM85B,rs7823056,2.93E-25	FAM85B,rs2955581,2.15E-50,Testis	r2(rs7823056,rs2955581)=0.336	ALG1L13P,rs7823056,1.02E-21	ALG1L13P,rs2980439,1.65E-46,Cells_Transformed_fibroblasts	r2(rs7823056,rs2980439)=0.307	8	8525195	rs7823056	A	G	0.54	0.61	0.88	0.49				7 tissues			TCF12			27 hits	31kb 3' of CTD-3023L14.3	143kb 5' of SGK223
25	rs6995407	8384647	SGK223	8	8527137	LOC105379224	1.78e-20	5	SGK223(Thyroid,2.21E-36);FAM86B3P(Cells_Transformed_fibroblasts,8.72E-34);FAM86B3P(Esophagus_Mucosa,2.55E-30);CTA-398F10.2(Skin_Sun_Exposed_Lower_leg,4.15E-29);CTA-398F10.2(Skin_Not_Sun_Exposed_Suprapubic,1.77E-27);FAM85B(Testis,2.06E-25);ALG1L13P(Cells_Transformed_fibroblasts,7.27E-22);ERI1(Cells_Transformed_fibroblasts,4.04E-21);FAM86B3P(Adipose_Visceral_Omentum,1.44E-18);FAM85B(Nerve_Tibial,4.…	SGK223,rs6995407,2.21E-36	SGK223,rs2921053,1.04E-67,Thyroid	r2(rs6995407,rs2921053)=0.417	FAM86B3P,rs6995407,8.72E-34	FAM86B3P,rs2980439,1.26E-80,Cells_Transformed_fibroblasts	r2(rs6995407,rs2980439)=0.308	CTA-398F10.2,rs6995407,4.15E-29	CTA-398F10.2,rs2921057,2.76E-53,Skin_Sun_Exposed_Lower_leg	r2(rs6995407,rs2921057)=0.455	FAM85B,rs6995407,2.06E-25	FAM85B,rs2955581,2.15E-50,Testis	r2(rs6995407,rs2955581)=0.337	ALG1L13P,rs6995407,7.27E-22	ALG1L13P,rs2980439,1.65E-46,Cells_Transformed_fibroblasts	r2(rs6995407,rs2980439)=0.308	8	8527137	rs6995407	C	G	0.54	0.61	0.88	0.49				9 tissues	IPSC,SKIN		6 altered motifs			27 hits	29kb 3' of CTD-3023L14.3	145kb 5' of SGK223
26	rs7826238	8387095	SGK223	8	8529585	LOC105379224	4.47e-19	6	FAM86B3P(Cells_Transformed_fibroblasts,1.97E-36);FAM86B3P(Esophagus_Mucosa,5.80E-34);SGK223(Thyroid,5.90E-34);CTA-398F10.2(Skin_Sun_Exposed_Lower_leg,1.46E-26);CTA-398F10.2(Skin_Not_Sun_Exposed_Suprapubic,1.97E-25);FAM85B(Testis,3.50E-24);ALG1L13P(Cells_Transformed_fibroblasts,4.61E-22);ERI1(Cells_Transformed_fibroblasts,7.85E-21);FAM86B3P(Adipose_Visceral_Omentum,2.28E-19);FAM85B(Nerve_Tibial,6.…	FAM86B3P,rs7826238,1.97E-36	FAM86B3P,rs2980439,1.26E-80,Cells_Transformed_fibroblasts	r2(rs7826238,rs2980439)=0.351	SGK223,rs7826238,5.90E-34	SGK223,rs2921053,1.04E-67,Thyroid	r2(rs7826238,rs2921053)=0.495	CTA-398F10.2,rs7826238,1.46E-26	CTA-398F10.2,rs2921057,2.76E-53,Skin_Sun_Exposed_Lower_leg	r2(rs7826238,rs2921057)=0.4	FAM85B,rs7826238,3.50E-24	FAM85B,rs2955581,2.15E-50,Testis	r2(rs7826238,rs2955581)=0.408	ALG1L13P,rs7826238,4.61E-22	ALG1L13P,rs2980439,1.65E-46,Cells_Transformed_fibroblasts	r2(rs7826238,rs2980439)=0.351	8	8529585	rs7826238	G	T	0.38	0.55	0.88	0.45				OVRY, LIV			STAT			25 hits	26kb 3' of CTD-3023L14.3	148kb 5' of SGK223
27	rs435581	9029413	PPP1R3B	8	9171903	LOC102724880	1.95e-14	4	SGK223(Thyroid,1.63E-25);ERI1(Cells_Transformed_fibroblasts,1.13E-23);FAM86B3P(Esophagus_Mucosa,1.47E-20);FAM86B3P(Cells_Transformed_fibroblasts,2.92E-19);RP11-62H7.2(Thyroid,3.20E-16);CTA-398F10.2(Skin_Sun_Exposed_Lower_leg,4.49E-15);FAM85B(Brain_Cerebellum,1.89E-14);FAM86B3P(Adipose_Visceral_Omentum,1.00E-13);FAM85B(Testis,1.00E-13);FAM85B(Brain_Anterior_cingulate_cortex_BA24,1.04E-13);FAM85B(B…	SGK223,rs435581,1.63E-25	SGK223,rs2921053,1.04E-67,Thyroid	r2(rs435581,rs2921053)=0.205	ERI1,rs435581,1.13E-23	ERI1,rs2979256,1.19E-53,Cells_Transformed_fibroblasts	r2(rs435581,rs2979256)=0.239	FAM86B3P,rs435581,1.47E-20	FAM86B3P,rs2980439,1.26E-80,Cells_Transformed_fibroblasts	r2(rs435581,rs2980439)=0.212	RP11-62H7.2,rs435581,3.20E-16	RP11-62H7.2,rs6994163,4.50E-30,Thyroid	r2(rs435581,rs6994163)=0.214	CTA-398F10.2,rs435581,4.49E-15	CTA-398F10.2,rs2921057,2.76E-53,Skin_Sun_Exposed_Lower_leg	r2(rs435581,rs2921057)=0.209	8	9171903	rs435581	A	G	0.56	0.63	0.91	0.49			BLD	ESC, ESDR, IPSC	6 tissues	6 bound proteins	4 altered motifs		2 hits	23 hits	3.8kb 3' of RP11-10A14.4	20kb 5' of PPP1R3B
28	rs453301	9030387	PPP1R3B	8	9172877	LOC102724880	1.23e-15	5	SGK223(Thyroid,2.26E-26);ERI1(Cells_Transformed_fibroblasts,4.56E-23);FAM86B3P(Cells_Transformed_fibroblasts,3.00E-22);FAM86B3P(Esophagus_Mucosa,2.00E-19);RP11-62H7.2(Thyroid,6.96E-17);CTA-398F10.2(Skin_Sun_Exposed_Lower_leg,3.38E-15);FAM86B3P(Adipose_Visceral_Omentum,1.45E-14);FAM85B(Testis,5.40E-14);FAM85B(Brain_Anterior_cingulate_cortex_BA24,5.51E-14);ALG1L13P(Cells_Transformed_fibroblasts,5.6…	SGK223,rs453301,2.26E-26	SGK223,rs2921053,1.04E-67,Thyroid	r2(rs453301,rs2921053)=0.225	ERI1,rs453301,4.56E-23	ERI1,rs2979256,1.19E-53,Cells_Transformed_fibroblasts	r2(rs453301,rs2979256)=0.25	FAM86B3P,rs453301,3.00E-22	FAM86B3P,rs2980439,1.26E-80,Cells_Transformed_fibroblasts	r2(rs453301,rs2980439)=0.217	RP11-62H7.2,rs453301,6.96E-17	RP11-62H7.2,rs6994163,4.50E-30,Thyroid	r2(rs453301,rs6994163)=0.226	CTA-398F10.2,rs453301,3.38E-15	CTA-398F10.2,rs2921057,2.76E-53,Skin_Sun_Exposed_Lower_leg	r2(rs453301,rs2921057)=0.222	8	9172877	rs453301	T	G	0.52	0.62	0.86	0.48			BLD	8 tissues	BLD		Zec			21 hits	4.7kb 3' of RP11-10A14.4	21kb 5' of PPP1R3B
29	rs393155	9033093	PPP1R3B	8	9175583	LOC102724880	1.12e-15	5	SGK223(Thyroid,1.04E-28);FAM86B3P(Cells_Transformed_fibroblasts,4.56E-25);ERI1(Cells_Transformed_fibroblasts,2.63E-22);FAM86B3P(Esophagus_Mucosa,1.37E-19);RP11-62H7.2(Thyroid,1.97E-17);ALG1L13P(Cells_Transformed_fibroblasts,1.18E-16);FAM85B(Brain_Cortex,1.62E-15);FAM86B3P(Adipose_Visceral_Omentum,1.06E-13);CTA-398F10.2(Skin_Sun_Exposed_Lower_leg,1.16E-13);FAM85B(Testis,2.20E-13);FAM85B(Nerve_Tibi…	SGK223,rs393155,1.04E-28	SGK223,rs2921053,1.04E-67,Thyroid	r2(rs393155,rs2921053)=0.259	FAM86B3P,rs393155,4.56E-25	FAM86B3P,rs2980439,1.26E-80,Cells_Transformed_fibroblasts	r2(rs393155,rs2980439)=0.264	ERI1,rs393155,2.63E-22	ERI1,rs2979256,1.19E-53,Cells_Transformed_fibroblasts	r2(rs393155,rs2979256)=0.306	RP11-62H7.2,rs393155,1.97E-17	RP11-62H7.2,rs6994163,4.50E-30,Thyroid	r2(rs393155,rs6994163)=0.214	ALG1L13P,rs393155,1.18E-16	ALG1L13P,rs2980439,1.65E-46,Cells_Transformed_fibroblasts	r2(rs393155,rs2980439)=0.264	8	9175583	rs393155	G	A	0.34	0.62	0.86	0.49							FXR			19 hits	4.7kb 3' of RP11-10A14.6	24kb 5' of PPP1R3B
30	rs439989	9033744	PPP1R3B	8	9176234	LOC102724880	1.41e-14	6	SGK223(Thyroid,1.66E-25);FAM86B3P(Cells_Transformed_fibroblasts,1.93E-25);ERI1(Cells_Transformed_fibroblasts,1.77E-24);FAM86B3P(Esophagus_Mucosa,1.51E-23);CTA-398F10.2(Skin_Sun_Exposed_Lower_leg,1.33E-17);RP11-62H7.2(Thyroid,4.55E-17);ALG1L13P(Cells_Transformed_fibroblasts,7.28E-17);FAM85B(Brain_Cortex,4.41E-15);FAM86B3P(Adipose_Visceral_Omentum,7.42E-15);FAM85B(Testis,2.78E-14);FAM85B(Nerve_Tibi…	SGK223,rs439989,1.66E-25	SGK223,rs2921053,1.04E-67,Thyroid	r2(rs439989,rs2921053)=0.314	FAM86B3P,rs439989,1.93E-25	FAM86B3P,rs2980439,1.26E-80,Cells_Transformed_fibroblasts	r2(rs439989,rs2980439)=0.318	ERI1,rs439989,1.77E-24	ERI1,rs2979256,1.19E-53,Cells_Transformed_fibroblasts	r2(rs439989,rs2979256)=0.429	CTA-398F10.2,rs439989,1.33E-17	CTA-398F10.2,rs2921057,2.76E-53,Skin_Sun_Exposed_Lower_leg	r2(rs439989,rs2921057)=0.167	RP11-62H7.2,rs439989,4.55E-17	RP11-62H7.2,rs6994163,4.50E-30,Thyroid	r2(rs439989,rs6994163)=0.249	8	9176234	rs439989	C	G	0.12	0.61	0.9	0.5							6 altered motifs		1 hit	24 hits	4kb 3' of RP11-10A14.6	25kb 5' of PPP1R3B
31	rs11998274	9139828	LOC157273	8	9282318	LOC157273	2.63e-14	7	SGK223(Thyroid,1.58E-17);CTA-398F10.2(Skin_Sun_Exposed_Lower_leg,7.56E-13);CTA-398F10.2(Skin_Not_Sun_Exposed_Suprapubic,7.08E-12);RP11-62H7.2(Thyroid,3.56E-10);ERI1(Cells_Transformed_fibroblasts,5.28E-10);CTA-398F10.2(Thyroid,9.93E-08)	SGK223,rs11998274,1.58E-17	SGK223,rs2921053,1.04E-67,Thyroid	r2(rs11998274,rs2921053)=0.092	CTA-398F10.2,rs11998274,7.56E-13	CTA-398F10.2,rs2921057,2.76E-53,Skin_Sun_Exposed_Lower_leg	r2(rs11998274,rs2921057)=0.074	RP11-62H7.2,rs11998274,3.56E-10	RP11-62H7.2,rs6994163,4.50E-30,Thyroid	r2(rs11998274,rs6994163)=0.056	ERI1,rs11998274,5.28E-10	ERI1,rs2979256,1.19E-53,Cells_Transformed_fibroblasts	r2(rs11998274,rs2979256)=0.077				8	9282318	rs11998274	G	C	0.29	0.47	0.52	0.35					ADRL		EBF,Ets,Ik-2			7 hits	RP11-115J16.1	43kb 5' of LOC157273
32	rs11249913	9143521	LOC157273	8	9286011	LOC157273	4.27e-15	6	SGK223(Thyroid,4.96E-22);CTA-398F10.2(Skin_Sun_Exposed_Lower_leg,9.88E-16);CTA-398F10.2(Skin_Not_Sun_Exposed_Suprapubic,7.39E-13);ERI1(Cells_Transformed_fibroblasts,4.27E-11);CTA-398F10.2(Thyroid,1.41E-10);RP11-62H7.2(Thyroid,3.86E-09)	SGK223,rs11249913,4.96E-22	SGK223,rs2921053,1.04E-67,Thyroid	r2(rs11249913,rs2921053)=0.138	CTA-398F10.2,rs11249913,9.88E-16	CTA-398F10.2,rs2921057,2.76E-53,Skin_Sun_Exposed_Lower_leg	r2(rs11249913,rs2921057)=0.087	ERI1,rs11249913,4.27E-11	ERI1,rs2979256,1.19E-53,Cells_Transformed_fibroblasts	r2(rs11249913,rs2979256)=0.152	RP11-62H7.2,rs11249913,3.86E-09	RP11-62H7.2,rs6994163,4.50E-30,Thyroid	r2(rs11249913,rs6994163)=0.095				8	9286011	rs11249913	T	G	0.12	0.4	0.43	0.38				ESC, BLD			Pou1f1		2 hits	6 hits	RP11-115J16.1	39kb 5' of LOC157273
33	rs36111783	9145588	LOC157273	8	9288078	LOC157273	1.1e-15	7	SGK223(Thyroid,2.27E-20);CTA-398F10.2(Skin_Sun_Exposed_Lower_leg,2.31E-14);CTA-398F10.2(Skin_Not_Sun_Exposed_Suprapubic,3.25E-13);ERI1(Cells_Transformed_fibroblasts,2.71E-11);CTA-398F10.2(Thyroid,6.45E-10);RP11-62H7.2(Thyroid,6.52E-09)	SGK223,rs36111783,2.27E-20	SGK223,rs2921053,1.04E-67,Thyroid	r2(rs36111783,rs2921053)=0.135	CTA-398F10.2,rs36111783,2.31E-14	CTA-398F10.2,rs2921057,2.76E-53,Skin_Sun_Exposed_Lower_leg	r2(rs36111783,rs2921057)=0.076	ERI1,rs36111783,2.71E-11	ERI1,rs2979256,1.19E-53,Cells_Transformed_fibroblasts	r2(rs36111783,rs2979256)=0.15	RP11-62H7.2,rs36111783,6.52E-09	RP11-62H7.2,rs6994163,4.50E-30,Thyroid	r2(rs36111783,rs6994163)=0.08				8	9288078	rs36111783	A	G	0.08	0.38	0.44	0.38										5 hits	RP11-115J16.1	37kb 5' of LOC157273
34	rs7002693	9148830	LOC157273	8	9291320	LOC157273	2.19e-15	7	SGK223(Thyroid,3.28E-19);CTA-398F10.2(Skin_Sun_Exposed_Lower_leg,5.51E-15);CTA-398F10.2(Skin_Not_Sun_Exposed_Suprapubic,3.87E-13);ERI1(Cells_Transformed_fibroblasts,2.05E-10);RP11-62H7.2(Thyroid,1.34E-08);CTA-398F10.2(Thyroid,3.28E-08)	SGK223,rs7002693,3.28E-19	SGK223,rs2921053,1.04E-67,Thyroid	r2(rs7002693,rs2921053)=0.06	CTA-398F10.2,rs7002693,5.51E-15	CTA-398F10.2,rs2921057,2.76E-53,Skin_Sun_Exposed_Lower_leg	r2(rs7002693,rs2921057)=0.064	ERI1,rs7002693,2.05E-10	ERI1,rs2979256,1.19E-53,Cells_Transformed_fibroblasts	r2(rs7002693,rs2979256)=0.049	RP11-62H7.2,rs7002693,1.34E-08	RP11-62H7.2,rs6994163,4.50E-30,Thyroid	r2(rs7002693,rs6994163)=0.033				8	9291320	rs7002693	G	C	0.39	0.4	0.48	0.38				ESDR, GI						6 hits	RP11-115J16.1	34kb 5' of LOC157273
35	rs330088	9149746	LOC157273	8	9292236	LOC157273	1.66e-13	6	SGK223(Thyroid,8.65E-25);CTA-398F10.2(Skin_Sun_Exposed_Lower_leg,2.53E-18);CTA-398F10.2(Skin_Not_Sun_Exposed_Suprapubic,2.29E-12);ERI1(Cells_Transformed_fibroblasts,5.73E-12);RP11-62H7.2(Thyroid,3.20E-11);RP11-115J16.2(Testis,5.78E-08)	SGK223,rs330088,8.65E-25	SGK223,rs2921053,1.04E-67,Thyroid	r2(rs330088,rs2921053)=0.277	CTA-398F10.2,rs330088,2.53E-18	CTA-398F10.2,rs2921057,2.76E-53,Skin_Sun_Exposed_Lower_leg	r2(rs330088,rs2921057)=0.194	ERI1,rs330088,5.73E-12	ERI1,rs2979256,1.19E-53,Cells_Transformed_fibroblasts	r2(rs330088,rs2979256)=0.245	RP11-62H7.2,rs330088,3.20E-11	RP11-62H7.2,rs6994163,4.50E-30,Thyroid	r2(rs330088,rs6994163)=0.176	RP11-115J16.2,rs330088,5.78E-08	RP11-115J16.2,rs898797,5.12E-24,Testis	r2(rs330088,rs898797)=0.288	8	9292236	rs330088	T	C	0.36	0.66	0.96	0.51				4 tissues			Irx			9 hits	RP11-115J16.1	33kb 5' of LOC157273
36	rs10503387	9150525	LOC157273	8	9293015	LOC157273	7.76e-16	5	SGK223(Thyroid,5.85E-21);CTA-398F10.2(Skin_Sun_Exposed_Lower_leg,4.04E-15);CTA-398F10.2(Skin_Not_Sun_Exposed_Suprapubic,1.99E-12);ERI1(Cells_Transformed_fibroblasts,6.34E-11);CTA-398F10.2(Thyroid,6.14E-10);RP11-62H7.2(Thyroid,6.86E-09)	SGK223,rs10503387,5.85E-21	SGK223,rs2921053,1.04E-67,Thyroid	r2(rs10503387,rs2921053)=0.124	CTA-398F10.2,rs10503387,4.04E-15	CTA-398F10.2,rs2921057,2.76E-53,Skin_Sun_Exposed_Lower_leg	r2(rs10503387,rs2921057)=0.083	ERI1,rs10503387,6.34E-11	ERI1,rs2979256,1.19E-53,Cells_Transformed_fibroblasts	r2(rs10503387,rs2979256)=0.136	RP11-62H7.2,rs10503387,6.86E-09	RP11-62H7.2,rs6994163,4.50E-30,Thyroid	r2(rs10503387,rs6994163)=0.089				8	9293015	rs10503387	C	T	0.14	0.4	0.44	0.38					HRT		Pou2f2			6 hits	RP11-115J16.1	32kb 5' of LOC157273
37	rs62493780	9151051	LOC157273	8	9293541	LOC157273	1.74e-11	7	CTA-398F10.2(Skin_Sun_Exposed_Lower_leg,3.67E-08);SGK223(Thyroid,4.09E-08)	CTA-398F10.2,rs62493780,3.67E-08	CTA-398F10.2,rs2921057,2.76E-53,Skin_Sun_Exposed_Lower_leg	r2(rs62493780,rs2921057)=0.022	SGK223,rs62493780,4.09E-08	SGK223,rs2921053,1.04E-67,Thyroid	r2(rs62493780,rs2921053)=0.049										8	9293541	rs62493780	C	T	0.02	0.28	0.15	0.27				HRT	HRT		Arnt,BHLHE40,Mxi1			6 hits	RP11-115J16.1	32kb 5' of LOC157273
38	rs719409	9151226	LOC157273	8	9293716	LOC157273	6.46e-15	7	SGK223(Thyroid,1.40E-21);CTA-398F10.2(Skin_Sun_Exposed_Lower_leg,3.57E-15);CTA-398F10.2(Skin_Not_Sun_Exposed_Suprapubic,1.07E-12);ERI1(Cells_Transformed_fibroblasts,1.10E-10);CTA-398F10.2(Thyroid,4.62E-10);RP11-62H7.2(Thyroid,8.00E-09)	SGK223,rs719409,1.40E-21	SGK223,rs2921053,1.04E-67,Thyroid	r2(rs719409,rs2921053)=0.125	CTA-398F10.2,rs719409,3.57E-15	CTA-398F10.2,rs2921057,2.76E-53,Skin_Sun_Exposed_Lower_leg	r2(rs719409,rs2921057)=0.082	ERI1,rs719409,1.10E-10	ERI1,rs2979256,1.19E-53,Cells_Transformed_fibroblasts	r2(rs719409,rs2979256)=0.137	RP11-62H7.2,rs719409,8.00E-09	RP11-62H7.2,rs6994163,4.50E-30,Thyroid	r2(rs719409,rs6994163)=0.092				8	9293716	rs719409	C	T	0.14	0.4	0.44	0.38				HRT			HNF1			6 hits	RP11-115J16.1	31kb 5' of LOC157273
39	rs11774353	9153127	LOC157273	8	9295617	LOC157273	4.07e-16	6	SGK223(Thyroid,1.91E-22);CTA-398F10.2(Skin_Sun_Exposed_Lower_leg,6.11E-16);CTA-398F10.2(Skin_Not_Sun_Exposed_Suprapubic,5.91E-14);ERI1(Cells_Transformed_fibroblasts,2.97E-11);CTA-398F10.2(Thyroid,1.22E-10);RP11-62H7.2(Thyroid,2.63E-09)	SGK223,rs11774353,1.91E-22	SGK223,rs2921053,1.04E-67,Thyroid	r2(rs11774353,rs2921053)=0.131	CTA-398F10.2,rs11774353,6.11E-16	CTA-398F10.2,rs2921057,2.76E-53,Skin_Sun_Exposed_Lower_leg	r2(rs11774353,rs2921057)=0.087	ERI1,rs11774353,2.97E-11	ERI1,rs2979256,1.19E-53,Cells_Transformed_fibroblasts	r2(rs11774353,rs2979256)=0.149	RP11-62H7.2,rs11774353,2.63E-09	RP11-62H7.2,rs6994163,4.50E-30,Thyroid	r2(rs11774353,rs6994163)=0.094				8	9295617	rs11774353	C	T	0.13	0.42	0.43	0.37				ESDR, HRT	HRT				2 hits	6 hits	RP11-115J16.1	29kb 5' of LOC157273
40	rs11781008	9153239	LOC157273	8	9295729	LOC157273	7.41e-16	6	SGK223(Thyroid,1.81E-22);CTA-398F10.2(Skin_Sun_Exposed_Lower_leg,4.47E-16);CTA-398F10.2(Skin_Not_Sun_Exposed_Suprapubic,7.29E-15);ERI1(Cells_Transformed_fibroblasts,7.69E-12);CTA-398F10.2(Thyroid,1.53E-10);RP11-62H7.2(Thyroid,1.44E-09)	SGK223,rs11781008,1.81E-22	SGK223,rs2921053,1.04E-67,Thyroid	r2(rs11781008,rs2921053)=0.133	CTA-398F10.2,rs11781008,4.47E-16	CTA-398F10.2,rs2921057,2.76E-53,Skin_Sun_Exposed_Lower_leg	r2(rs11781008,rs2921057)=0.078	ERI1,rs11781008,7.69E-12	ERI1,rs2979256,1.19E-53,Cells_Transformed_fibroblasts	r2(rs11781008,rs2979256)=0.154	RP11-62H7.2,rs11781008,1.44E-09	RP11-62H7.2,rs6994163,4.50E-30,Thyroid	r2(rs11781008,rs6994163)=0.086				8	9295729	rs11781008	G	T	0.08	0.41	0.43	0.37				HRT	HRT		4 altered motifs			6 hits	RP11-115J16.1	29kb 5' of LOC157273
41	rs11774915	9188762	LOC157273	8	9331252	LOC157273	8.91e-15	7	RP11-115J16.3(Testis,6.11E-16);CTA-398F10.2(Skin_Sun_Exposed_Lower_leg,1.64E-14);RP11-115J16.2(Testis,1.70E-12);SGK223(Thyroid,4.30E-12);CTA-398F10.2(Skin_Not_Sun_Exposed_Suprapubic,1.63E-11);ERI1(Cells_Transformed_fibroblasts,5.71E-08)	RP11-115J16.3,rs11774915,6.11E-16	RP11-115J16.3,rs10089120,1.61E-28,Testis	r2(rs11774915,rs10089120)=0.239	CTA-398F10.2,rs11774915,1.64E-14	CTA-398F10.2,rs2921057,2.76E-53,Skin_Sun_Exposed_Lower_leg	r2(rs11774915,rs2921057)=0.041	RP11-115J16.2,rs11774915,1.70E-12	RP11-115J16.2,rs898797,5.12E-24,Testis	r2(rs11774915,rs898797)=0.137	SGK223,rs11774915,4.30E-12	SGK223,rs2921053,1.04E-67,Thyroid	r2(rs11774915,rs2921053)=0.074	ERI1,rs11774915,5.71E-08	ERI1,rs2979256,1.19E-53,Cells_Transformed_fibroblasts	r2(rs11774915,rs2979256)=0.086	8	9331252	rs11774915	C	T	0.08	0.41	0.33	0.31							SREBP			5 hits	RP11-115J16.1	LOC157273	intronic
42	rs6601302	9239458	LOC157273	8	9381948	LOC105379231	2.57e-10	6	RP11-115J16.3(Testis,6.71E-16)	RP11-115J16.3,rs6601302,6.71E-16	RP11-115J16.3,rs10089120,1.61E-28,Testis	r2(rs6601302,rs10089120)=0.265													8	9381948	rs6601302	T	G	0.85	0.8	0.72	0.78							DMRT1		1 hit	3 hits	RP11-115J16.2	47kb 3' of LOC157273
43	rs13262031	9389241	TNKS	8	9531731	TNKS	8.91e-15	6	ERI1(Cells_Transformed_fibroblasts,1.50E-08)	ERI1,rs13262031,1.50E-08	ERI1,rs2979256,1.19E-53,Cells_Transformed_fibroblasts	r2(rs13262031,rs2979256)=0.025													8	9531731	rs13262031	T	C	0.26	0.57	0.35	0.65							10 altered motifs			3 hits	24kb 5' of TNKS	24kb 5' of TNKS
44	rs12114661	9573154	TNKS	8	9715644	TNKS	2.75e-15	7	RP11-115J16.2(Testis,3.83E-09);ERI1(Cells_Transformed_fibroblasts,8.63E-09);RP11-62H7.2(Thyroid,2.08E-08)	RP11-115J16.2,rs12114661,3.83E-09	RP11-115J16.2,rs898797,5.12E-24,Testis	r2(rs12114661,rs898797)=0.07	ERI1,rs12114661,8.63E-09	ERI1,rs2979256,1.19E-53,Cells_Transformed_fibroblasts	r2(rs12114661,rs2979256)=0.058	RP11-62H7.2,rs12114661,2.08E-08	RP11-62H7.2,rs6994163,4.50E-30,Thyroid	r2(rs12114661,rs6994163)=0.066							8	9715644	rs12114661	G	A	0.5	0.59	0.46	0.66							PPAR,RXRA,YY1			3 hits	TNKS	TNKS	intronic
45	rs4129360	9573284	TNKS	8	9715774	TNKS	3.47e-15	7	RP11-115J16.2(Testis,3.76E-09);ERI1(Cells_Transformed_fibroblasts,8.43E-09);RP11-62H7.2(Thyroid,2.30E-08)	RP11-115J16.2,rs4129360,3.76E-09	RP11-115J16.2,rs898797,5.12E-24,Testis	r2(rs4129360,rs898797)=0.07	ERI1,rs4129360,8.43E-09	ERI1,rs2979256,1.19E-53,Cells_Transformed_fibroblasts	r2(rs4129360,rs2979256)=0.058	RP11-62H7.2,rs4129360,2.30E-08	RP11-62H7.2,rs6994163,4.50E-30,Thyroid	r2(rs4129360,rs6994163)=0.066							8	9715774	rs4129360	T	A	0.5	0.59	0.46	0.66							4 altered motifs			3 hits	TNKS	TNKS	intronic
46	rs13272424	9575319	TNKS	8	9717809	TNKS	1.86e-15	6	RP11-115J16.2(Testis,5.96E-09);ERI1(Cells_Transformed_fibroblasts,1.62E-08);RP11-62H7.2(Thyroid,9.92E-08)	RP11-115J16.2,rs13272424,5.96E-09	RP11-115J16.2,rs898797,5.12E-24,Testis	r2(rs13272424,rs898797)=0.068	ERI1,rs13272424,1.62E-08	ERI1,rs2979256,1.19E-53,Cells_Transformed_fibroblasts	r2(rs13272424,rs2979256)=0.052	RP11-62H7.2,rs13272424,9.92E-08	RP11-62H7.2,rs6994163,4.50E-30,Thyroid	r2(rs13272424,rs6994163)=0.062							8	9717809	rs13272424	T	G	0.48	0.59	0.46	0.66				MUS			4 altered motifs			3 hits	TNKS	TNKS	intronic
47	rs13264850	9575331	TNKS	8	9717821	TNKS	3.98e-15	7	RP11-115J16.2(Testis,6.79E-09);ERI1(Cells_Transformed_fibroblasts,1.51E-08);RP11-62H7.2(Thyroid,7.75E-08)	RP11-115J16.2,rs13264850,6.79E-09	RP11-115J16.2,rs898797,5.12E-24,Testis	r2(rs13264850,rs898797)=0.07	ERI1,rs13264850,1.51E-08	ERI1,rs2979256,1.19E-53,Cells_Transformed_fibroblasts	r2(rs13264850,rs2979256)=0.059	RP11-62H7.2,rs13264850,7.75E-08	RP11-62H7.2,rs6994163,4.50E-30,Thyroid	r2(rs13264850,rs6994163)=0.066							8	9717821	rs13264850	A	T	0.5	0.59	0.46	0.66				MUS			Gfi1,Mef2,SPIB			3 hits	TNKS	TNKS	intronic
48	rs6994574	9578255	TNKS	8	9720745	TNKS	2.63e-15	5	ERI1(Cells_Transformed_fibroblasts,1.62E-08);RP11-115J16.2(Testis,2.25E-08);RP11-62H7.2(Thyroid,2.84E-08)	ERI1,rs6994574,1.62E-08	ERI1,rs2979256,1.19E-53,Cells_Transformed_fibroblasts	r2(rs6994574,rs2979256)=0.062	RP11-115J16.2,rs6994574,2.25E-08	RP11-115J16.2,rs898797,5.12E-24,Testis	r2(rs6994574,rs898797)=0.077	RP11-62H7.2,rs6994574,2.84E-08	RP11-62H7.2,rs6994163,4.50E-30,Thyroid	r2(rs6994574,rs6994163)=0.065							8	9720745	rs6994574	G	A	0.55	0.59	0.46	0.66			BLD	BLD, KID	BLD	NFKB	8 altered motifs			3 hits	TNKS	TNKS	intronic
49	rs13276086	9578982	TNKS	8	9721472	TNKS	4.57e-15	6	RP11-115J16.2(Testis,9.28E-09);ERI1(Cells_Transformed_fibroblasts,5.12E-08)	RP11-115J16.2,rs13276086,9.28E-09	RP11-115J16.2,rs898797,5.12E-24,Testis	r2(rs13276086,rs898797)=0.073	ERI1,rs13276086,5.12E-08	ERI1,rs2979256,1.19E-53,Cells_Transformed_fibroblasts	r2(rs13276086,rs2979256)=0.059										8	9721472	rs13276086	T	G	0.52	0.6	0.46	0.66							7 altered motifs			4 hits	TNKS	TNKS	intronic
50	rs13268319	9579249	TNKS	8	9721739	TNKS	5.89e-15	7	RP11-115J16.2(Testis,1.15E-08);ERI1(Cells_Transformed_fibroblasts,2.54E-08);RP11-62H7.2(Thyroid,4.33E-08)	RP11-115J16.2,rs13268319,1.15E-08	RP11-115J16.2,rs898797,5.12E-24,Testis	r2(rs13268319,rs898797)=0.073	ERI1,rs13268319,2.54E-08	ERI1,rs2979256,1.19E-53,Cells_Transformed_fibroblasts	r2(rs13268319,rs2979256)=0.06	RP11-62H7.2,rs13268319,4.33E-08	RP11-62H7.2,rs6994163,4.50E-30,Thyroid	r2(rs13268319,rs6994163)=0.066							8	9721739	rs13268319	C	A	0.51	0.6	0.45	0.66							CEBPB,STAT,Zfp187			3 hits	TNKS	TNKS	intronic
51	rs4612345	9580001	TNKS	8	9722491	TNKS	2.24e-15	7	RP11-115J16.2(Testis,1.87E-08);ERI1(Cells_Transformed_fibroblasts,2.40E-08);RP11-62H7.2(Thyroid,7.29E-08)	RP11-115J16.2,rs4612345,1.87E-08	RP11-115J16.2,rs898797,5.12E-24,Testis	r2(rs4612345,rs898797)=0.072	ERI1,rs4612345,2.40E-08	ERI1,rs2979256,1.19E-53,Cells_Transformed_fibroblasts	r2(rs4612345,rs2979256)=0.059	RP11-62H7.2,rs4612345,7.29E-08	RP11-62H7.2,rs6994163,4.50E-30,Thyroid	r2(rs4612345,rs6994163)=0.065							8	9722491	rs4612345	A	G	0.52	0.6	0.46	0.66							Foxa,Pou5f1			3 hits	TNKS	TNKS	intronic
52	rs6982148	9581070	TNKS	8	9723560	TNKS	2.75e-15	6	ERI1(Cells_Transformed_fibroblasts,9.51E-09);RP11-115J16.2(Testis,1.34E-08);RP11-62H7.2(Thyroid,3.39E-08)	ERI1,rs6982148,9.51E-09	ERI1,rs2979256,1.19E-53,Cells_Transformed_fibroblasts	r2(rs6982148,rs2979256)=0.058	RP11-115J16.2,rs6982148,1.34E-08	RP11-115J16.2,rs898797,5.12E-24,Testis	r2(rs6982148,rs898797)=0.07	RP11-62H7.2,rs6982148,3.39E-08	RP11-62H7.2,rs6994163,4.50E-30,Thyroid	r2(rs6982148,rs6994163)=0.067							8	9723560	rs6982148	G	C	0.5	0.59	0.46	0.66							5 altered motifs			3 hits	TNKS	TNKS	intronic
53	rs4841203	9582730	TNKS	8	9725220	TNKS	2.29e-15	6	RP11-115J16.2(Testis,4.72E-09);ERI1(Cells_Transformed_fibroblasts,2.37E-08);RP11-62H7.2(Thyroid,2.95E-08)	RP11-115J16.2,rs4841203,4.72E-09	RP11-115J16.2,rs898797,5.12E-24,Testis	r2(rs4841203,rs898797)=0.073	ERI1,rs4841203,2.37E-08	ERI1,rs2979256,1.19E-53,Cells_Transformed_fibroblasts	r2(rs4841203,rs2979256)=0.06	RP11-62H7.2,rs4841203,2.95E-08	RP11-62H7.2,rs6994163,4.50E-30,Thyroid	r2(rs4841203,rs6994163)=0.066							8	9725220	rs4841203	A	G	0.52	0.6	0.46	0.66							HNF4,RXRA			3 hits	TNKS	TNKS	intronic
54	rs4841204	9583407	TNKS	8	9725897	TNKS	1.66e-15	7	RP11-115J16.2(Testis,5.33E-09);ERI1(Cells_Transformed_fibroblasts,2.25E-08);RP11-62H7.2(Thyroid,3.40E-08)	RP11-115J16.2,rs4841204,5.33E-09	RP11-115J16.2,rs898797,5.12E-24,Testis	r2(rs4841204,rs898797)=0.074	ERI1,rs4841204,2.25E-08	ERI1,rs2979256,1.19E-53,Cells_Transformed_fibroblasts	r2(rs4841204,rs2979256)=0.06	RP11-62H7.2,rs4841204,3.40E-08	RP11-62H7.2,rs6994163,4.50E-30,Thyroid	r2(rs4841204,rs6994163)=0.066							8	9725897	rs4841204	G	A	0.52	0.59	0.46	0.66										3 hits	TNKS	TNKS	intronic
55	rs12679956	9584849	TNKS	8	9727339	TNKS	1.66e-15	6	ERI1(Cells_Transformed_fibroblasts,1.72E-08);RP11-115J16.2(Testis,4.45E-08)	ERI1,rs12679956,1.72E-08	ERI1,rs2979256,1.19E-53,Cells_Transformed_fibroblasts	r2(rs12679956,rs2979256)=0.052	RP11-115J16.2,rs12679956,4.45E-08	RP11-115J16.2,rs898797,5.12E-24,Testis	r2(rs12679956,rs898797)=0.068										8	9727339	rs12679956	G	A	0.48	0.58	0.46	0.66							Mef2,Nkx3			3 hits	TNKS	TNKS	intronic
56	rs12542912	9585196	TNKS	8	9727686	TNKS	2.14e-15	6	RP11-115J16.2(Testis,1.41E-08);ERI1(Cells_Transformed_fibroblasts,2.54E-08);RP11-62H7.2(Thyroid,4.63E-08)	RP11-115J16.2,rs12542912,1.41E-08	RP11-115J16.2,rs898797,5.12E-24,Testis	r2(rs12542912,rs898797)=0.073	ERI1,rs12542912,2.54E-08	ERI1,rs2979256,1.19E-53,Cells_Transformed_fibroblasts	r2(rs12542912,rs2979256)=0.061	RP11-62H7.2,rs12542912,4.63E-08	RP11-62H7.2,rs6994163,4.50E-30,Thyroid	r2(rs12542912,rs6994163)=0.066							8	9727686	rs12542912	C	T	0.52	0.59	0.46	0.66							Mef2			3 hits	TNKS	TNKS	intronic
57	rs6992666	9586704	TNKS	8	9729194	TNKS	2.57e-15	5	RP11-115J16.2(Testis,1.29E-08);ERI1(Cells_Transformed_fibroblasts,1.93E-08)	RP11-115J16.2,rs6992666,1.29E-08	RP11-115J16.2,rs898797,5.12E-24,Testis	r2(rs6992666,rs898797)=0.069	ERI1,rs6992666,1.93E-08	ERI1,rs2979256,1.19E-53,Cells_Transformed_fibroblasts	r2(rs6992666,rs2979256)=0.054										8	9729194	rs6992666	A	C	0.48	0.59	0.44	0.66			IPSC	ESDR, BLD	4 tissues		THAP1			3 hits	TNKS	TNKS	intronic
58	rs11778555	9587574	TNKS	8	9730064	TNKS	2.34e-15	7	RP11-115J16.2(Testis,1.41E-08);ERI1(Cells_Transformed_fibroblasts,2.49E-08);RP11-62H7.2(Thyroid,4.65E-08)	RP11-115J16.2,rs11778555,1.41E-08	RP11-115J16.2,rs898797,5.12E-24,Testis	r2(rs11778555,rs898797)=0.074	ERI1,rs11778555,2.49E-08	ERI1,rs2979256,1.19E-53,Cells_Transformed_fibroblasts	r2(rs11778555,rs2979256)=0.06	RP11-62H7.2,rs11778555,4.65E-08	RP11-62H7.2,rs6994163,4.50E-30,Thyroid	r2(rs11778555,rs6994163)=0.066							8	9730064	rs11778555	C	T	0.52	0.59	0.45	0.66				BLD			4 altered motifs			3 hits	TNKS	TNKS	intronic
59	rs11785923	9587674	TNKS	8	9730164	TNKS	2.63e-15	4	ERI1(Cells_Transformed_fibroblasts,1.25E-08);RP11-62H7.2(Thyroid,3.32E-08);RP11-115J16.2(Testis,3.50E-08)	ERI1,rs11785923,1.25E-08	ERI1,rs2979256,1.19E-53,Cells_Transformed_fibroblasts	r2(rs11785923,rs2979256)=0.06	RP11-62H7.2,rs11785923,3.32E-08	RP11-62H7.2,rs6994163,4.50E-30,Thyroid	r2(rs11785923,rs6994163)=0.066	RP11-115J16.2,rs11785923,3.50E-08	RP11-115J16.2,rs898797,5.12E-24,Testis	r2(rs11785923,rs898797)=0.074							8	9730164	rs11785923	G	C	0.52	0.59	0.46	0.66			ESDR		ESDR		EWSR1-FLI1,Hic1			3 hits	TNKS	TNKS	intronic
60	rs11782886	9587891	TNKS	8	9730381	TNKS	3.02e-15	5	RP11-115J16.2(Testis,5.50E-09);ERI1(Cells_Transformed_fibroblasts,2.54E-08);RP11-62H7.2(Thyroid,3.38E-08)	RP11-115J16.2,rs11782886,5.50E-09	RP11-115J16.2,rs898797,5.12E-24,Testis	r2(rs11782886,rs898797)=0.074	ERI1,rs11782886,2.54E-08	ERI1,rs2979256,1.19E-53,Cells_Transformed_fibroblasts	r2(rs11782886,rs2979256)=0.06	RP11-62H7.2,rs11782886,3.38E-08	RP11-62H7.2,rs6994163,4.50E-30,Thyroid	r2(rs11782886,rs6994163)=0.065							8	9730381	rs11782886	A	G	0.53	0.59	0.46	0.66			ESDR				Myc,XBP-1			3 hits	TNKS	TNKS	intronic
61	rs4841207	9591398	TNKS	8	9733888	TNKS	6.03e-11	6	RP11-115J16.2(Testis,2.93E-09)	RP11-115J16.2,rs4841207,2.93E-09	RP11-115J16.2,rs898797,5.12E-24,Testis	r2(rs4841207,rs898797)=0.047													8	9733888	rs4841207	C	T	0.65	0.64	0.56	0.72							12 altered motifs			2 hits	TNKS	TNKS	intronic
62	rs35169606	9604066	TNKS	8	9746556	TNKS	2.34e-14	6	RP11-62H7.2(Thyroid,9.11E-09);ERI1(Cells_Transformed_fibroblasts,1.04E-08);RP11-115J16.2(Testis,9.35E-08)	RP11-62H7.2,rs35169606,9.11E-09	RP11-62H7.2,rs6994163,4.50E-30,Thyroid	r2(rs35169606,rs6994163)=0.07	ERI1,rs35169606,1.04E-08	ERI1,rs2979256,1.19E-53,Cells_Transformed_fibroblasts	r2(rs35169606,rs2979256)=0.04	RP11-115J16.2,rs35169606,9.35E-08	RP11-115J16.2,rs898797,5.12E-24,Testis	r2(rs35169606,rs898797)=0.099							8	9746556	rs35169606	T	G	0.03	0.24	0.03	0.41							6 altered motifs			3 hits	TNKS	TNKS	intronic
63	rs10102170	9611470	TNKS	8	9753960	TNKS	4.37e-16	7	ERI1(Cells_Transformed_fibroblasts,1.70E-08);RP11-115J16.2(Testis,3.86E-08);RP11-62H7.2(Thyroid,4.04E-08)	ERI1,rs10102170,1.70E-08	ERI1,rs2979256,1.19E-53,Cells_Transformed_fibroblasts	r2(rs10102170,rs2979256)=0.057	RP11-115J16.2,rs10102170,3.86E-08	RP11-115J16.2,rs898797,5.12E-24,Testis	r2(rs10102170,rs898797)=0.067	RP11-62H7.2,rs10102170,4.04E-08	RP11-62H7.2,rs6994163,4.50E-30,Thyroid	r2(rs10102170,rs6994163)=0.065							8	9753960	rs10102170	C	T	0.5	0.41	0.5	0.34					BLD		7 altered motifs			3 hits	TNKS	TNKS	intronic
64	rs28693548	9612882	TNKS	8	9755372	TNKS	4.07e-12	7	RP11-62H7.2(Thyroid,9.53E-08)	RP11-62H7.2,rs28693548,9.53E-08	RP11-62H7.2,rs6994163,4.50E-30,Thyroid	r2(rs28693548,rs6994163)=0.032													8	9755372	rs28693548	T	C	0.22	0.35	0.42	0.28							6 altered motifs			1 hit	TNKS	TNKS	intronic
65	rs4383974	9619348	TNKS	8	9761838	TNKS	2.04e-13	5	RP11-115J16.2(Testis,6.63E-08)	RP11-115J16.2,rs4383974,6.63E-08	RP11-115J16.2,rs898797,5.12E-24,Testis	r2(rs4383974,rs898797)=0.051													8	9761838	rs4383974	C	G	0.28	0.34	0.42	0.28				LIV						1 hit	TNKS	TNKS	intronic
66	rs9657509	9620359	TNKS	8	9762849	TNKS	1.32e-16	7	ERI1(Cells_Transformed_fibroblasts,1.38E-08);RP11-115J16.2(Testis,1.72E-08);RP11-62H7.2(Thyroid,9.20E-08)	ERI1,rs9657509,1.38E-08	ERI1,rs2979256,1.19E-53,Cells_Transformed_fibroblasts	r2(rs9657509,rs2979256)=0.05	RP11-115J16.2,rs9657509,1.72E-08	RP11-115J16.2,rs898797,5.12E-24,Testis	r2(rs9657509,rs898797)=0.066	RP11-62H7.2,rs9657509,9.20E-08	RP11-62H7.2,rs6994163,4.50E-30,Thyroid	r2(rs9657509,rs6994163)=0.064							8	9762849	rs9657509	A	G	0.47	0.4	0.51	0.32							ATF3,HNF4			3 hits	TNKS	TNKS	intronic
67	rs2048656	9644659	TNKS	8	9787149	TNKS	1.91e-15	7	ERI1(Cells_Transformed_fibroblasts,1.50E-09);RP11-62H7.2(Thyroid,7.06E-08)	ERI1,rs2048656,1.50E-09	ERI1,rs2979256,1.19E-53,Cells_Transformed_fibroblasts	r2(rs2048656,rs2979256)=0.048	RP11-62H7.2,rs2048656,7.06E-08	RP11-62H7.2,rs6994163,4.50E-30,Thyroid	r2(rs2048656,rs6994163)=0.062										8	9787149	rs2048656	G	A	0.51	0.44	0.54	0.36							GATA			2 hits	4.8kb 3' of TNKS	4.8kb 3' of TNKS
68	rs2175846	9644976	TNKS	8	9787466	TNKS	8.13e-15	6	ERI1(Cells_Transformed_fibroblasts,2.10E-09)	ERI1,rs2175846,2.10E-09	ERI1,rs2979256,1.19E-53,Cells_Transformed_fibroblasts	r2(rs2175846,rs2979256)=0.043													8	9787466	rs2175846	G	T	0.53	0.44	0.54	0.35							Gmeb1			3 hits	5.1kb 3' of TNKS	5.1kb 3' of TNKS
69	rs2014514	9647196	TNKS	8	9789686	TNKS	1.62e-14	6	ERI1(Cells_Transformed_fibroblasts,1.13E-09);RP11-62H7.2(Thyroid,6.14E-08)	ERI1,rs2014514,1.13E-09	ERI1,rs2979256,1.19E-53,Cells_Transformed_fibroblasts	r2(rs2014514,rs2979256)=0.047	RP11-62H7.2,rs2014514,6.14E-08	RP11-62H7.2,rs6994163,4.50E-30,Thyroid	r2(rs2014514,rs6994163)=0.056										8	9789686	rs2014514	A	T	0.52	0.43	0.53	0.35				PANC, LIV			6 altered motifs			2 hits	7.3kb 3' of TNKS	7.3kb 3' of TNKS
70	rs7820675	9647748	TNKS	8	9790238	TNKS	5.5e-15	7	ERI1(Cells_Transformed_fibroblasts,1.41E-09);RP11-62H7.2(Thyroid,9.70E-08)	ERI1,rs7820675,1.41E-09	ERI1,rs2979256,1.19E-53,Cells_Transformed_fibroblasts	r2(rs7820675,rs2979256)=0.049	RP11-62H7.2,rs7820675,9.70E-08	RP11-62H7.2,rs6994163,4.50E-30,Thyroid	r2(rs7820675,rs6994163)=0.059										8	9790238	rs7820675	C	G	0.5	0.45	0.54	0.35				LIV			Myf,NF-E2,p300			2 hits	7.9kb 3' of TNKS	7.9kb 3' of TNKS
71	rs7838571	9647796	TNKS	8	9790286	TNKS	1.1e-14	6	ERI1(Cells_Transformed_fibroblasts,7.81E-10)	ERI1,rs7838571,7.81E-10	ERI1,rs2979256,1.19E-53,Cells_Transformed_fibroblasts	r2(rs7838571,rs2979256)=0.046													8	9790286	rs7838571	A	G	0.52	0.45	0.54	0.35				LIV			HDAC2,MIF-1			3 hits	7.9kb 3' of TNKS	7.9kb 3' of TNKS
72	rs7820917	9647868	TNKS	8	9790358	TNKS	9.12e-15	6	ERI1(Cells_Transformed_fibroblasts,7.81E-10);RP11-115J16.2(Testis,8.45E-08)	ERI1,rs7820917,7.81E-10	ERI1,rs2979256,1.19E-53,Cells_Transformed_fibroblasts	r2(rs7820917,rs2979256)=0.045	RP11-115J16.2,rs7820917,8.45E-08	RP11-115J16.2,rs898797,5.12E-24,Testis	r2(rs7820917,rs898797)=0.06										8	9790358	rs7820917	C	T	0.52	0.45	0.54	0.35							RXRA		2 hits	2 hits	8kb 3' of TNKS	8kb 3' of TNKS
73	rs12678014	9649165	TNKS	8	9791655	TNKS	3.89e-15	6	ERI1(Cells_Transformed_fibroblasts,7.81E-10);RP11-115J16.2(Testis,9.68E-08)	ERI1,rs12678014,7.81E-10	ERI1,rs2979256,1.19E-53,Cells_Transformed_fibroblasts	r2(rs12678014,rs2979256)=0.047	RP11-115J16.2,rs12678014,9.68E-08	RP11-115J16.2,rs898797,5.12E-24,Testis	r2(rs12678014,rs898797)=0.062										8	9791655	rs12678014	T	C	0.52	0.45	0.55	0.35							8 altered motifs			2 hits	9.3kb 3' of TNKS	9.3kb 3' of TNKS
74	rs7829463	9649691	TNKS	8	9792181	TNKS	1.05e-14	6	ERI1(Cells_Transformed_fibroblasts,2.11E-09)	ERI1,rs7829463,2.11E-09	ERI1,rs2979256,1.19E-53,Cells_Transformed_fibroblasts	r2(rs7829463,rs2979256)=0.071													8	9792181	rs7829463	G	C	0.37	0.41	0.53	0.34									2 hits	2 hits	9.8kb 3' of TNKS	9.8kb 3' of TNKS
75	rs6980595	9651162	TNKS	8	9793652	TNKS	1.02e-14	5	ERI1(Cells_Transformed_fibroblasts,7.81E-10)	ERI1,rs6980595,7.81E-10	ERI1,rs2979256,1.19E-53,Cells_Transformed_fibroblasts	r2(rs6980595,rs2979256)=0.047													8	9793652	rs6980595	G	A	0.48	0.56	0.45	0.65			ESDR	LIV			GATA,Sox			2 hits	11kb 3' of TNKS	11kb 3' of TNKS
76	rs4840438	9651811	TNKS	8	9794301	TNKS	6.17e-15	7	ERI1(Cells_Transformed_fibroblasts,6.08E-10)	ERI1,rs4840438,6.08E-10	ERI1,rs2979256,1.19E-53,Cells_Transformed_fibroblasts	r2(rs4840438,rs2979256)=0.046													8	9794301	rs4840438	T	C	0.49	0.56	0.46	0.65				LIV			BCL			2 hits	12kb 3' of TNKS	12kb 3' of TNKS
77	rs10103925	9652211	TNKS	8	9794701	TNKS	4.9e-15	7	ERI1(Cells_Transformed_fibroblasts,7.81E-10)	ERI1,rs10103925,7.81E-10	ERI1,rs2979256,1.19E-53,Cells_Transformed_fibroblasts	r2(rs10103925,rs2979256)=0.046													8	9794701	rs10103925	G	A	0.49	0.56	0.45	0.65							HNF1,Hoxa4,TCF12			2 hits	12kb 3' of TNKS	12kb 3' of TNKS
78	rs7836375	9652258	TNKS	8	9794748	TNKS	1.91e-15	7	ERI1(Cells_Transformed_fibroblasts,3.53E-09)	ERI1,rs7836375,3.53E-09	ERI1,rs2979256,1.19E-53,Cells_Transformed_fibroblasts	r2(rs7836375,rs2979256)=0.067													8	9794748	rs7836375	A	G	0.38	0.41	0.54	0.35							AP-1,NF-E2			2 hits	12kb 3' of TNKS	12kb 3' of TNKS
79	rs7844461	9653055	TNKS	8	9795545	TNKS	2.4e-15	6	ERI1(Cells_Transformed_fibroblasts,2.62E-09)	ERI1,rs7844461,2.62E-09	ERI1,rs2979256,1.19E-53,Cells_Transformed_fibroblasts	r2(rs7844461,rs2979256)=0.068													8	9795545	rs7844461	T	A	0.38	0.41	0.54	0.35							Barhl1,Maf			2 hits	13kb 3' of TNKS	13kb 3' of TNKS
80	rs9286060	9653145	TNKS	8	9795635	TNKS	5.37e-15	6	ERI1(Cells_Transformed_fibroblasts,8.98E-10);RP11-115J16.2(Testis,8.39E-08)	ERI1,rs9286060,8.98E-10	ERI1,rs2979256,1.19E-53,Cells_Transformed_fibroblasts	r2(rs9286060,rs2979256)=0.049	RP11-115J16.2,rs9286060,8.39E-08	RP11-115J16.2,rs898797,5.12E-24,Testis	r2(rs9286060,rs898797)=0.067										8	9795635	rs9286060	A	C	0.51	0.56	0.46	0.65							AIRE,Egr-1			2 hits	13kb 3' of TNKS	13kb 3' of TNKS
81	rs10107992	9653287	TNKS	8	9795777	TNKS	6.92e-15	6	ERI1(Cells_Transformed_fibroblasts,7.18E-10)	ERI1,rs10107992,7.18E-10	ERI1,rs2979256,1.19E-53,Cells_Transformed_fibroblasts	r2(rs10107992,rs2979256)=0.046													8	9795777	rs10107992	G	A	0.49	0.56	0.46	0.65							NF-kappaB			2 hits	13kb 3' of TNKS	13kb 3' of TNKS
82	rs4841218	9653902	TNKS	8	9796392	TNKS	1.62e-14	6	ERI1(Cells_Transformed_fibroblasts,7.81E-10)	ERI1,rs4841218,7.81E-10	ERI1,rs2979256,1.19E-53,Cells_Transformed_fibroblasts	r2(rs4841218,rs2979256)=0.047													8	9796392	rs4841218	T	C	0.48	0.56	0.46	0.65							4 altered motifs			2 hits	14kb 3' of TNKS	14kb 3' of TNKS
83	rs4841219	9654185	TNKS	8	9796675	TNKS	5.62e-15	7	ERI1(Cells_Transformed_fibroblasts,1.00E-09);RP11-115J16.2(Testis,8.39E-08)	ERI1,rs4841219,1.00E-09	ERI1,rs2979256,1.19E-53,Cells_Transformed_fibroblasts	r2(rs4841219,rs2979256)=0.045	RP11-115J16.2,rs4841219,8.39E-08	RP11-115J16.2,rs898797,5.12E-24,Testis	r2(rs4841219,rs898797)=0.062										8	9796675	rs4841219	A	C	0.51	0.59	0.47	0.65										2 hits	14kb 3' of TNKS	14kb 3' of TNKS
84	rs7828039	9654757	TNKS	8	9797247	TNKS	4.9e-15	7	ERI1(Cells_Transformed_fibroblasts,1.97E-09)	ERI1,rs7828039,1.97E-09	ERI1,rs2979256,1.19E-53,Cells_Transformed_fibroblasts	r2(rs7828039,rs2979256)=0.045													8	9797247	rs7828039	G	C	0.48	0.54	0.45	0.65							4 altered motifs			2 hits	15kb 3' of TNKS	15kb 3' of TNKS
85	rs10112972	9655218	TNKS	8	9797708	TNKS	5.62e-15	6	ERI1(Cells_Transformed_fibroblasts,1.17E-09)	ERI1,rs10112972,1.17E-09	ERI1,rs2979256,1.19E-53,Cells_Transformed_fibroblasts	r2(rs10112972,rs2979256)=0.046													8	9797708	rs10112972	T	A	0.48	0.55	0.46	0.65										2 hits	15kb 3' of TNKS	15kb 3' of TNKS
86	rs10113155	9655358	TNKS	8	9797848	TNKS	6.31e-15	6	ERI1(Cells_Transformed_fibroblasts,4.96E-09)	ERI1,rs10113155,4.96E-09	ERI1,rs2979256,1.19E-53,Cells_Transformed_fibroblasts	r2(rs10113155,rs2979256)=0.046													8	9797848	rs10113155	T	C	0.49	0.55	0.46	0.65							IRC900814,TCF4			2 hits	16kb 3' of TNKS	16kb 3' of TNKS
87	rs10113186	9655426	TNKS	8	9797916	TNKS	6.76e-15	6	ERI1(Cells_Transformed_fibroblasts,8.70E-08)	ERI1,rs10113186,8.70E-08	ERI1,rs2979256,1.19E-53,Cells_Transformed_fibroblasts	r2(rs10113186,rs2979256)=0.046													8	9797916	rs10113186	T	C	0.5	0.55	0.46	0.65							Pou2f2,Pou3f3			2 hits	16kb 3' of TNKS	16kb 3' of TNKS
88	rs11249949	9655612	TNKS	8	9798102	TNKS	7.94e-15	6	ERI1(Cells_Transformed_fibroblasts,2.26E-09)	ERI1,rs11249949,2.26E-09	ERI1,rs2979256,1.19E-53,Cells_Transformed_fibroblasts	r2(rs11249949,rs2979256)=0.048													8	9798102	rs11249949	T	C	0.51	0.55	0.46	0.65							4 altered motifs			2 hits	16kb 3' of TNKS	16kb 3' of TNKS
89	rs12543346	9655823	TNKS	8	9798313	TNKS	3.09e-15	6	ERI1(Cells_Transformed_fibroblasts,3.76E-09)	ERI1,rs12543346,3.76E-09	ERI1,rs2979256,1.19E-53,Cells_Transformed_fibroblasts	r2(rs12543346,rs2979256)=0.045													8	9798313	rs12543346	C	G	0.48	0.54	0.46	0.65							Pou2f2,Zfp187			2 hits	16kb 3' of TNKS	16kb 3' of TNKS
90	rs12543369	9655915	TNKS	8	9798405	TNKS	9.77e-15	7	ERI1(Cells_Transformed_fibroblasts,2.16E-09)	ERI1,rs12543369,2.16E-09	ERI1,rs2979256,1.19E-53,Cells_Transformed_fibroblasts	r2(rs12543369,rs2979256)=0.045													8	9798405	rs12543369	C	A	0.48	0.54	0.46	0.64							4 altered motifs			2 hits	16kb 3' of TNKS	16kb 3' of TNKS
91	rs12546411	9655916	TNKS	8	9798406	TNKS	9.33e-15	7	ERI1(Cells_Transformed_fibroblasts,2.16E-09)	ERI1,rs12546411,2.16E-09	ERI1,rs2979256,1.19E-53,Cells_Transformed_fibroblasts	r2(rs12546411,rs2979256)=0.045													8	9798406	rs12546411	T	A	0.48	0.54	0.46	0.65							GATA,ZEB1			2 hits	16kb 3' of TNKS	16kb 3' of TNKS
92	rs4841220	9656059	TNKS	8	9798549	TNKS	3.8e-15	6	ERI1(Cells_Transformed_fibroblasts,4.25E-09)	ERI1,rs4841220,4.25E-09	ERI1,rs2979256,1.19E-53,Cells_Transformed_fibroblasts	r2(rs4841220,rs2979256)=0.048													8	9798549	rs4841220	T	G	0.51	0.54	0.46	0.65							7 altered motifs			2 hits	16kb 3' of TNKS	16kb 3' of TNKS
93	rs4841222	9656302	TNKS	8	9798792	TNKS	2.75e-13	7	ERI1(Cells_Transformed_fibroblasts,6.73E-09)	ERI1,rs4841222,6.73E-09	ERI1,rs2979256,1.19E-53,Cells_Transformed_fibroblasts	r2(rs4841222,rs2979256)=0.042													8	9798792	rs4841222	C	T	0.49	0.55	0.45	0.65							Pax-4,TCF12			2 hits	16kb 3' of TNKS	16kb 3' of TNKS
94	rs11249956	9658194	TNKS	8	9800684	TNKS	1.59e-14	6	ERI1(Cells_Transformed_fibroblasts,1.05E-08)	ERI1,rs11249956,1.05E-08	ERI1,rs2979256,1.19E-53,Cells_Transformed_fibroblasts	r2(rs11249956,rs2979256)=0.041													8	9800684	rs11249956	G	C	0.48	0.54	0.47	0.65							Nanog,RXRA			2 hits	18kb 3' of TNKS	18kb 3' of TNKS
95	rs9987266	9659346	TNKS	8	9801836	TNKS	4.27e-15	7	ERI1(Cells_Transformed_fibroblasts,7.30E-09)	ERI1,rs9987266,7.30E-09	ERI1,rs2979256,1.19E-53,Cells_Transformed_fibroblasts	r2(rs9987266,rs2979256)=0.042													8	9801836	rs9987266	T	C	0.48	0.55	0.46	0.66				IPSC			Nkx6-2			3 hits	19kb 3' of TNKS	19kb 3' of TNKS
96	rs13259398	9659935	TNKS	8	9802425	TNKS	6.31e-15	5	ERI1(Cells_Transformed_fibroblasts,7.30E-09)	ERI1,rs13259398,7.30E-09	ERI1,rs2979256,1.19E-53,Cells_Transformed_fibroblasts	r2(rs13259398,rs2979256)=0.04													8	9802425	rs13259398	T	A	0.47	0.54	0.46	0.66				LIV	PLCNT,CRVX	KAP1,P300,SETDB1	HNF4,Myf,RP58			2 hits	20kb 3' of TNKS	20kb 3' of TNKS
97	rs35431433	9660621	TNKS	8	9803111	TNKS	3.31e-15	7	ERI1(Cells_Transformed_fibroblasts,2.00E-09)	ERI1,rs35431433,2.00E-09	ERI1,rs2979256,1.19E-53,Cells_Transformed_fibroblasts	r2(rs35431433,rs2979256)=0.045													8	9803111	rs35431433	C	T	0.49	0.54	0.46	0.65							Rad21			2 hits	21kb 3' of TNKS	21kb 3' of TNKS
98	rs56225255	9661202	TNKS	8	9803692	TNKS	1.48e-14	7	ERI1(Cells_Transformed_fibroblasts,5.47E-09)	ERI1,rs56225255,5.47E-09	ERI1,rs2979256,1.19E-53,Cells_Transformed_fibroblasts	r2(rs56225255,rs2979256)=0.043													8	9803692	rs56225255	G	A	0.49	0.55	0.46	0.65							15 altered motifs			3 hits	21kb 3' of TNKS	21kb 3' of TNKS
99	rs34746821	9661267	TNKS	8	9803757	TNKS	9.77e-15	6	ERI1(Cells_Transformed_fibroblasts,7.18E-09)	ERI1,rs34746821,7.18E-09	ERI1,rs2979256,1.19E-53,Cells_Transformed_fibroblasts	r2(rs34746821,rs2979256)=0.043													8	9803757	rs34746821	G	A	0.48	0.55	0.47	0.66							LUN-1,Pax-5,Pitx2			3 hits	21kb 3' of TNKS	21kb 3' of TNKS
100	rs28828176	9663453	TNKS	8	9805943	TNKS	1.66e-15	7	ERI1(Cells_Transformed_fibroblasts,1.46E-09)	ERI1,rs28828176,1.46E-09	ERI1,rs2979256,1.19E-53,Cells_Transformed_fibroblasts	r2(rs28828176,rs2979256)=0.027													8	9805943	rs28828176	A	C	0.43	0.57	0.46	0.66							Egr-1			3 hits	24kb 3' of TNKS	24kb 3' of TNKS
101	rs34782826	9663630	TNKS	8	9806120	TNKS	1.15e-15	7	ERI1(Cells_Transformed_fibroblasts,1.85E-09)	ERI1,rs34782826,1.85E-09	ERI1,rs2979256,1.19E-53,Cells_Transformed_fibroblasts	r2(rs34782826,rs2979256)=0.032													8	9806120	rs34782826	G	T	0.43	0.54	0.47	0.66							AP-2rep,Roaz,Zfp740			3 hits	24kb 3' of TNKS	24kb 3' of TNKS
102	rs35607831	9663751	TNKS	8	9806241	TNKS	3.8e-15	7	ERI1(Cells_Transformed_fibroblasts,1.46E-09)	ERI1,rs35607831,1.46E-09	ERI1,rs2979256,1.19E-53,Cells_Transformed_fibroblasts	r2(rs35607831,rs2979256)=0.031													8	9806241	rs35607831	G	C	0.43	0.54	0.47	0.66							HDAC2,p300			3 hits	24kb 3' of TNKS	24kb 3' of TNKS
103	rs13249447	9665074	TNKS	8	9807564	TNKS	4.9e-15	7	ERI1(Cells_Transformed_fibroblasts,1.67E-09)	ERI1,rs13249447,1.67E-09	ERI1,rs2979256,1.19E-53,Cells_Transformed_fibroblasts	r2(rs13249447,rs2979256)=0.028													8	9807564	rs13249447	A	C	0.43	0.56	0.48	0.65							5 altered motifs			3 hits	25kb 3' of TNKS	25kb 3' of TNKS
104	rs35293371	9667227	TNKS	8	9809717	TNKS	2.51e-15	7	ERI1(Cells_Transformed_fibroblasts,9.54E-10)	ERI1,rs35293371,9.54E-10	ERI1,rs2979256,1.19E-53,Cells_Transformed_fibroblasts	r2(rs35293371,rs2979256)=0.027													8	9809717	rs35293371	C	T	0.43	0.57	0.47	0.65							AIRE,Pou2f2,Pou3f2			3 hits	27kb 3' of TNKS	27kb 3' of TNKS
105	rs13275545	9667914	TNKS	8	9810404	TNKS	2e-15	7	ERI1(Cells_Transformed_fibroblasts,1.09E-09)	ERI1,rs13275545,1.09E-09	ERI1,rs2979256,1.19E-53,Cells_Transformed_fibroblasts	r2(rs13275545,rs2979256)=0.028													8	9810404	rs13275545	G	C	0.44	0.57	0.48	0.65							Brachyury,GR,HNF4			3 hits	28kb 3' of TNKS	28kb 3' of TNKS
106	rs4841225	9669164	TNKS	8	9811654	TNKS	1.82e-15	7	ERI1(Cells_Transformed_fibroblasts,7.37E-10)	ERI1,rs4841225,7.37E-10	ERI1,rs2979256,1.19E-53,Cells_Transformed_fibroblasts	r2(rs4841225,rs2979256)=0.024													8	9811654	rs4841225	T	A	0.42	0.57	0.48	0.66							Ets,RXRA			3 hits	29kb 3' of TNKS	29kb 3' of TNKS
107	rs28634186	9669335	TNKS	8	9811825	TNKS	3.8e-16	7	ERI1(Cells_Transformed_fibroblasts,1.46E-09)	ERI1,rs28634186,1.46E-09	ERI1,rs2979256,1.19E-53,Cells_Transformed_fibroblasts	r2(rs28634186,rs2979256)=0.043													8	9811825	rs28634186	T	C	0.54	0.6	0.48	0.66							Myb			2 hits	29kb 3' of TNKS	29kb 3' of TNKS
108	rs10104807	9669775	TNKS	8	9812265	TNKS	3.8e-16	4	ERI1(Cells_Transformed_fibroblasts,1.16E-09)	ERI1,rs10104807,1.16E-09	ERI1,rs2979256,1.19E-53,Cells_Transformed_fibroblasts	r2(rs10104807,rs2979256)=0.037													8	9812265	rs10104807	G	A	0.47	0.58	0.48	0.65							ZBTB7A			2 hits	30kb 3' of TNKS	30kb 3' of TNKS
109	rs10095171	9669885	TNKS	8	9812375	TNKS	7.08e-16	4	ERI1(Cells_Transformed_fibroblasts,8.64E-10)	ERI1,rs10095171,8.64E-10	ERI1,rs2979256,1.19E-53,Cells_Transformed_fibroblasts	r2(rs10095171,rs2979256)=0.04													8	9812375	rs10095171	T	C	0.5	0.58	0.48	0.65							NF-Y			2 hits	30kb 3' of TNKS	30kb 3' of TNKS
110	rs10107396	9673152	TNKS	8	9815642	TNKS	4.17e-18	7	ERI1(Cells_Transformed_fibroblasts,2.69E-10)	ERI1,rs10107396,2.69E-10	ERI1,rs2979256,1.19E-53,Cells_Transformed_fibroblasts	r2(rs10107396,rs2979256)=0.039													8	9815642	rs10107396	T	C	0.49	0.58	0.49	0.65							PLZF			2 hits	33kb 3' of TNKS	33kb 3' of TNKS
111	rs10093915	9674181	TNKS	8	9816671	TNKS	1.59e-18	6	ERI1(Cells_Transformed_fibroblasts,3.41E-10)	ERI1,rs10093915,3.41E-10	ERI1,rs2979256,1.19E-53,Cells_Transformed_fibroblasts	r2(rs10093915,rs2979256)=0.044													8	9816671	rs10093915	C	A	0.53	0.59	0.48	0.64							GLI,SRF,p300			3 hits	34kb 3' of TNKS	34kb 3' of TNKS
112	rs7386132	9676536	TNKS	8	9819026	TNKS	1.32e-18	7	ERI1(Cells_Transformed_fibroblasts,4.69E-10)	ERI1,rs7386132,4.69E-10	ERI1,rs2979256,1.19E-53,Cells_Transformed_fibroblasts	r2(rs7386132,rs2979256)=0.046													8	9819026	rs7386132	G	A	0.55	0.6	0.48	0.65							CTCF,Nrf1			2 hits	37kb 3' of TNKS	37kb 3' of TNKS
113	rs4840441	9677798	TNKS	8	9820288	TNKS	1.59e-17	7	ERI1(Cells_Transformed_fibroblasts,3.60E-10)	ERI1,rs4840441,3.60E-10	ERI1,rs2979256,1.19E-53,Cells_Transformed_fibroblasts	r2(rs4840441,rs2979256)=0.042													8	9820288	rs4840441	A	G	0.48	0.54	0.47	0.62							Hic1,Nanog			2 hits	38kb 3' of TNKS	38kb 3' of TNKS
114	rs4841229	9678029	TNKS	8	9820519	TNKS	7.59e-18	6	ERI1(Cells_Transformed_fibroblasts,2.53E-10)	ERI1,rs4841229,2.53E-10	ERI1,rs2979256,1.19E-53,Cells_Transformed_fibroblasts	r2(rs4841229,rs2979256)=0.05													8	9820519	rs4841229	C	A	0.56	0.58	0.48	0.63							NF-kappaB			2 hits	38kb 3' of TNKS	38kb 3' of TNKS
115	rs4840442	9678925	TNKS	8	9821415	TNKS	1.26e-14	7	ERI1(Cells_Transformed_fibroblasts,8.49E-08)	ERI1,rs4840442,8.49E-08	ERI1,rs2979256,1.19E-53,Cells_Transformed_fibroblasts	r2(rs4840442,rs2979256)=0.037													8	9821415	rs4840442	T	C	0.25	0.36	0.36	0.31							CIZ,PLZF			1 hit	39kb 3' of TNKS	39kb 3' of TNKS
116	rs1976671	9679634	TNKS	8	9822124	TNKS	7.24e-18	6	ERI1(Cells_Transformed_fibroblasts,1.03E-09)	ERI1,rs1976671,1.03E-09	ERI1,rs2979256,1.19E-53,Cells_Transformed_fibroblasts	r2(rs1976671,rs2979256)=0.052													8	9822124	rs1976671	A	G	0.42	0.41	0.53	0.36							21 altered motifs			2 hits	40kb 3' of TNKS	40kb 3' of TNKS
117	rs1976672	9679692	TNKS	8	9822182	TNKS	1.51e-14	6	ERI1(Cells_Transformed_fibroblasts,7.30E-08)	ERI1,rs1976672,7.30E-08	ERI1,rs2979256,1.19E-53,Cells_Transformed_fibroblasts	r2(rs1976672,rs2979256)=0.037													8	9822182	rs1976672	G	T	0.25	0.36	0.36	0.31							Nr2f2,Pax-4,VDR			1 hit	40kb 3' of TNKS	40kb 3' of TNKS
118	rs7000322	9679742	TNKS	8	9822232	TNKS	5.5e-19	7	ERI1(Cells_Transformed_fibroblasts,4.33E-10)	ERI1,rs7000322,4.33E-10	ERI1,rs2979256,1.19E-53,Cells_Transformed_fibroblasts	r2(rs7000322,rs2979256)=0.043													8	9822232	rs7000322	C	T	0.5	0.56	0.47	0.64							GR,SIX5			2 hits	40kb 3' of TNKS	40kb 3' of TNKS
119	rs1976673	9679780	TNKS	8	9822270	TNKS	1.05e-14	7	ERI1(Cells_Transformed_fibroblasts,8.49E-08)	ERI1,rs1976673,8.49E-08	ERI1,rs2979256,1.19E-53,Cells_Transformed_fibroblasts	r2(rs1976673,rs2979256)=0.038													8	9822270	rs1976673	T	A	0.25	0.36	0.36	0.31							8 altered motifs			1 hit	40kb 3' of TNKS	40kb 3' of TNKS
120	rs55868514	9680400	TNKS	8	9822890	TNKS	4.07e-19	7	ERI1(Cells_Transformed_fibroblasts,3.92E-10)	ERI1,rs55868514,3.92E-10	ERI1,rs2979256,1.19E-53,Cells_Transformed_fibroblasts	r2(rs55868514,rs2979256)=0.04													8	9822890	rs55868514	T	C	0.49	0.57	0.48	0.64				BLD			NRSF			2 hits	41kb 3' of TNKS	41kb 3' of TNKS
121	rs483916	9793601	MIR124-1	8	9936091	MIR124-1	3.31e-20	7	RP11-62H7.2(Thyroid,4.66E-13);ERI1(Cells_Transformed_fibroblasts,3.58E-12);RP11-115J16.2(Testis,1.60E-08)	RP11-62H7.2,rs483916,4.66E-13	RP11-62H7.2,rs6994163,4.50E-30,Thyroid	r2(rs483916,rs6994163)=0.151	ERI1,rs483916,3.58E-12	ERI1,rs2979256,1.19E-53,Cells_Transformed_fibroblasts	r2(rs483916,rs2979256)=0.217	RP11-115J16.2,rs483916,1.60E-08	RP11-115J16.2,rs898797,5.12E-24,Testis	r2(rs483916,rs898797)=0.266							8	9936091	rs483916	A	C	0.6	0.42	0.03	0.56							NF-I,STAT			5 hits	4.3kb 5' of snoU13	33kb 5' of MIR124-1
122	rs615632	9796321	MIR124-1	8	9938811	MIR124-1	2.34e-20	5	ERI1(Cells_Transformed_fibroblasts,5.04E-14);RP11-62H7.2(Thyroid,3.80E-11);RP11-115J16.2(Testis,2.33E-09)	ERI1,rs615632,5.04E-14	ERI1,rs2979256,1.19E-53,Cells_Transformed_fibroblasts	r2(rs615632,rs2979256)=0.253	RP11-62H7.2,rs615632,3.80E-11	RP11-62H7.2,rs6994163,4.50E-30,Thyroid	r2(rs615632,rs6994163)=0.16	RP11-115J16.2,rs615632,2.33E-09	RP11-115J16.2,rs898797,5.12E-24,Testis	r2(rs615632,rs898797)=0.275							8	9938811	rs615632	C	T	0.72	0.42	0.04	0.56							CCNT2,TAL1			3 hits	7kb 5' of snoU13	35kb 5' of MIR124-1
123	rs13271489	9803712	MIR124-1	8	9946202	LOC105379235	1.549e-30	7	ERI1(Cells_Transformed_fibroblasts,4.61E-12);RP11-62H7.2(Thyroid,1.37E-09);RP11-115J16.2(Testis,6.25E-09);MSRA(Brain_Spinal_cord_cervical_c-1,6.71E-08)	ERI1,rs13271489,4.61E-12	ERI1,rs2979256,1.19E-53,Cells_Transformed_fibroblasts	r2(rs13271489,rs2979256)=0.067	RP11-62H7.2,rs13271489,1.37E-09	RP11-62H7.2,rs6994163,4.50E-30,Thyroid	r2(rs13271489,rs6994163)=0.097	RP11-115J16.2,rs13271489,6.25E-09	RP11-115J16.2,rs898797,5.12E-24,Testis	r2(rs13271489,rs898797)=0.157	MSRA,rs13271489,6.71E-08	MSRA,rs7833387,7.50E-10,Brain_Spinal_cord_cervical_c-1	r2(rs13271489,rs7833387)=0.453				8	9946202	rs13271489	T	C	0.15	0.38	0.04	0.55				BRN			4 altered motifs			2 hits	14kb 5' of snoU13	43kb 5' of MIR124-1
124	rs13264066	9804075	MIR124-1	8	9946565	LOC105379235	7.586e-32	6	ERI1(Cells_Transformed_fibroblasts,9.40E-13);RP11-115J16.2(Testis,2.68E-09);RP11-62H7.2(Thyroid,2.93E-09);MSRA(Brain_Spinal_cord_cervical_c-1,1.58E-08);RP11-10A14.5(Testis,3.17E-08)	ERI1,rs13264066,9.40E-13	ERI1,rs2979256,1.19E-53,Cells_Transformed_fibroblasts	r2(rs13264066,rs2979256)=0.087	RP11-115J16.2,rs13264066,2.68E-09	RP11-115J16.2,rs898797,5.12E-24,Testis	r2(rs13264066,rs898797)=0.19	RP11-62H7.2,rs13264066,2.93E-09	RP11-62H7.2,rs6994163,4.50E-30,Thyroid	r2(rs13264066,rs6994163)=0.107	MSRA,rs13264066,1.58E-08	MSRA,rs7833387,7.50E-10,Brain_Spinal_cord_cervical_c-1	r2(rs13264066,rs7833387)=0.471	RP11-10A14.5,rs13264066,3.17E-08	RP11-10A14.5,rs3748136,2.61E-59,Whole_Blood	r2(rs13264066,rs3748136)=0.01	8	9946565	rs13264066	C	G	0.23	0.39	0.04	0.56							9 altered motifs			2 hits	15kb 5' of snoU13	43kb 5' of MIR124-1
125	rs10092464	9804185	MIR124-1	8	9946675	LOC105379235	7.586e-12	6	RP11-62H7.2(Thyroid,6.20E-09)	RP11-62H7.2,rs10092464,6.20E-09	RP11-62H7.2,rs6994163,4.50E-30,Thyroid	r2(rs10092464,rs6994163)=0.089													8	9946675	rs10092464	C	G	0.28	0.46	0.88	0.33									2 hits	2 hits	15kb 5' of snoU13	43kb 5' of MIR124-1
126	rs9650622	9804292	MIR124-1	8	9946782	LOC105379235	3.236e-34	7	ERI1(Cells_Transformed_fibroblasts,1.10E-12);RP11-62H7.2(Thyroid,2.64E-09);RP11-115J16.2(Testis,2.68E-09);RP11-10A14.5(Testis,3.17E-08);MSRA(Brain_Spinal_cord_cervical_c-1,6.71E-08)	ERI1,rs9650622,1.10E-12	ERI1,rs2979256,1.19E-53,Cells_Transformed_fibroblasts	r2(rs9650622,rs2979256)=0.087	RP11-62H7.2,rs9650622,2.64E-09	RP11-62H7.2,rs6994163,4.50E-30,Thyroid	r2(rs9650622,rs6994163)=0.107	RP11-115J16.2,rs9650622,2.68E-09	RP11-115J16.2,rs898797,5.12E-24,Testis	r2(rs9650622,rs898797)=0.19	RP11-10A14.5,rs9650622,3.17E-08	RP11-10A14.5,rs3748136,2.61E-59,Whole_Blood	r2(rs9650622,rs3748136)=0.01	MSRA,rs9650622,6.71E-08	MSRA,rs7833387,7.50E-10,Brain_Spinal_cord_cervical_c-1	r2(rs9650622,rs7833387)=0.473	8	9946782	rs9650622	G	T	0.23	0.39	0.04	0.56							AP-1,RXRA,SF1			2 hits	15kb 5' of snoU13	43kb 5' of MIR124-1
127	rs56243511	9805695	MIR124-1				1.514e-29	6	ERI1(Cells_Transformed_fibroblasts,5.27E-13);RP11-62H7.2(Thyroid,3.77E-09);RP11-115J16.2(Testis,8.72E-09);MSRA(Brain_Spinal_cord_cervical_c-1,1.94E-08);RP11-10A14.5(Testis,3.71E-08)	ERI1,rs56243511,5.27E-13	ERI1,rs2979256,1.19E-53,Cells_Transformed_fibroblasts	r2(rs56243511,rs2979256)=0.095	RP11-62H7.2,rs56243511,3.77E-09	RP11-62H7.2,rs6994163,4.50E-30,Thyroid	r2(rs56243511,rs6994163)=0.105	RP11-115J16.2,rs56243511,8.72E-09	RP11-115J16.2,rs898797,5.12E-24,Testis	r2(rs56243511,rs898797)=0.198	MSRA,rs56243511,1.94E-08	MSRA,rs7833387,7.50E-10,Brain_Spinal_cord_cervical_c-1	r2(rs56243511,rs7833387)=0.471	RP11-10A14.5,rs56243511,3.71E-08	RP11-10A14.5,rs3748136,2.61E-59,Whole_Blood	r2(rs56243511,rs3748136)=0.01	8	9948185	rs56243511	T	C	0.27	0.4	0.04	0.56							6 altered motifs			2 hits	16kb 5' of snoU13	45kb 5' of MIR124-1
128	rs522483	9812969	MIR124-1	8	9955459	LOC105379235	1.479e-30	5	ERI1(Cells_Transformed_fibroblasts,2.59E-10);RP11-115J16.2(Testis,2.91E-09);RP11-10A14.5(Testis,1.68E-08);RP11-62H7.2(Thyroid,7.78E-08)	ERI1,rs522483,2.59E-10	ERI1,rs2979256,1.19E-53,Cells_Transformed_fibroblasts	r2(rs522483,rs2979256)=0.075	RP11-115J16.2,rs522483,2.91E-09	RP11-115J16.2,rs898797,5.12E-24,Testis	r2(rs522483,rs898797)=0.149	RP11-10A14.5,rs522483,1.68E-08	RP11-10A14.5,rs3748136,2.61E-59,Whole_Blood	r2(rs522483,rs3748136)=0.006	RP11-62H7.2,rs522483,7.78E-08	RP11-62H7.2,rs6994163,4.50E-30,Thyroid	r2(rs522483,rs6994163)=0.078				8	9955459	rs522483	C	G	0.39	0.51	0.05	0.59							Gfi1,Gfi1b			3 hits	24kb 5' of snoU13	52kb 5' of MIR124-1
129	rs656319	9814411	MIR124-1	8	9956901	LOC105379235	1.514e-19	6	ERI1(Cells_Transformed_fibroblasts,7.30E-11);RP11-115J16.2(Testis,3.61E-10);RP11-10A14.5(Testis,6.55E-09);MSRA(Brain_Spinal_cord_cervical_c-1,1.39E-08);RP11-62H7.2(Nerve_Tibial,3.29E-08)	ERI1,rs656319,7.30E-11	ERI1,rs2979256,1.19E-53,Cells_Transformed_fibroblasts	r2(rs656319,rs2979256)=0.107	RP11-115J16.2,rs656319,3.61E-10	RP11-115J16.2,rs898797,5.12E-24,Testis	r2(rs656319,rs898797)=0.152	RP11-10A14.5,rs656319,6.55E-09	RP11-10A14.5,rs3748136,2.61E-59,Whole_Blood	r2(rs656319,rs3748136)=0.007	MSRA,rs656319,1.39E-08	MSRA,rs7833387,7.50E-10,Brain_Spinal_cord_cervical_c-1	r2(rs656319,rs7833387)=0.319	RP11-62H7.2,rs656319,3.29E-08	RP11-62H7.2,rs6994163,4.50E-30,Thyroid	r2(rs656319,rs6994163)=0.097	8	9956901	rs656319	A	G	0.49	0.51	0.05	0.59							Irx	1 hit	2 hits	4 hits	25kb 5' of snoU13	53kb 5' of MIR124-1
130	rs591346	9818065	MIR124-1	8	9960555	LOC105379235	3.802e-23	5	ERI1(Cells_Transformed_fibroblasts,2.72E-12);RP11-10A14.5(Testis,1.32E-09);RP11-115J16.2(Testis,2.55E-09);MSRA(Brain_Spinal_cord_cervical_c-1,1.47E-08);RP11-981G7.6(Brain_Spinal_cord_cervical_c-1,5.54E-08)	ERI1,rs591346,2.72E-12	ERI1,rs2979256,1.19E-53,Cells_Transformed_fibroblasts	r2(rs591346,rs2979256)=0.133	RP11-10A14.5,rs591346,1.32E-09	RP11-10A14.5,rs3748136,2.61E-59,Whole_Blood	r2(rs591346,rs3748136)=0.008	RP11-115J16.2,rs591346,2.55E-09	RP11-115J16.2,rs898797,5.12E-24,Testis	r2(rs591346,rs898797)=0.174	MSRA,rs591346,1.47E-08	MSRA,rs7833387,7.50E-10,Brain_Spinal_cord_cervical_c-1	r2(rs591346,rs7833387)=0.342	RP11-981G7.6,rs591346,5.54E-08	RP11-981G7.6,rs3750314,2.14E-21,Esophagus_Muscularis	r2(rs591346,rs3750314)=0.06	8	9960555	rs591346	C	T	0.49	0.42	0.05	0.53					IPSC		Ets,STAT			6 hits	29kb 5' of snoU13	57kb 5' of MIR124-1
131	rs657913	9882575	MSRA	8	10025065	LOC105379235	3.467e-25	7	RP11-115J16.2(Testis,1.17E-09);RP11-10A14.5(Testis,6.35E-08)	RP11-115J16.2,rs657913,1.17E-09	RP11-115J16.2,rs898797,5.12E-24,Testis	r2(rs657913,rs898797)=0.145	RP11-10A14.5,rs657913,6.35E-08	RP11-10A14.5,rs3748136,2.61E-59,Whole_Blood	r2(rs657913,rs3748136)=0.013										8	10025065	rs657913	G	T	0.42	0.39	0.05	0.58											25kb 3' of RP11-1E4.1	29kb 5' of MSRA
132	rs560638	9882767	MSRA	8	10025257	LOC105379235	9.772e-30	7	RP11-115J16.2(Testis,6.02E-10);RP11-10A14.5(Testis,3.98E-08)	RP11-115J16.2,rs560638,6.02E-10	RP11-115J16.2,rs898797,5.12E-24,Testis	r2(rs560638,rs898797)=0.145	RP11-10A14.5,rs560638,3.98E-08	RP11-10A14.5,rs3748136,2.61E-59,Whole_Blood	r2(rs560638,rs3748136)=0.013										8	10025257	rs560638	A	G	0.44	0.39	0.05	0.58											25kb 3' of RP11-1E4.1	29kb 5' of MSRA
133	rs814359	9883132	MSRA	8	10025622	LOC105379235	1.122e-22	7	RP11-115J16.2(Testis,6.02E-10);RP11-10A14.5(Testis,3.98E-08)	RP11-115J16.2,rs814359,6.02E-10	RP11-115J16.2,rs898797,5.12E-24,Testis	r2(rs814359,rs898797)=0.146	RP11-10A14.5,rs814359,3.98E-08	RP11-10A14.5,rs3748136,2.61E-59,Whole_Blood	r2(rs814359,rs3748136)=0.013										8	10025622	rs814359	T	G	0.43	0.39	0.05	0.58											25kb 3' of RP11-1E4.1	29kb 5' of MSRA
134	rs688491	9884823	MSRA	8	10027313	LOC105379235	6.918e-27	4	RP11-115J16.2(Testis,2.12E-10);RP11-10A14.5(Testis,6.13E-08)	RP11-115J16.2,rs688491,2.12E-10	RP11-115J16.2,rs898797,5.12E-24,Testis	r2(rs688491,rs898797)=0.149	RP11-10A14.5,rs688491,6.13E-08	RP11-10A14.5,rs3748136,2.61E-59,Whole_Blood	r2(rs688491,rs3748136)=0.013										8	10027313	rs688491	C	G	0.44	0.4	0.05	0.58					SKIN,SKIN	STAT3	Myc				23kb 3' of RP11-1E4.1	27kb 5' of MSRA
135	rs534523	9884999	MSRA	8	10027489	LOC105379235	3.89e-20	6	RP11-115J16.2(Testis,1.55E-10);RP11-10A14.5(Testis,3.38E-08)	RP11-115J16.2,rs534523,1.55E-10	RP11-115J16.2,rs898797,5.12E-24,Testis	r2(rs534523,rs898797)=0.152	RP11-10A14.5,rs534523,3.38E-08	RP11-10A14.5,rs3748136,2.61E-59,Whole_Blood	r2(rs534523,rs3748136)=0.015										8	10027489	rs534523	C	G	0.44	0.39	0.05	0.56							Obox6		4 hits		23kb 3' of RP11-1E4.1	27kb 5' of MSRA
136	rs525726	9887797	MSRA	8	10030287	LOC105379235	3.02e-32	7	RP11-115J16.2(Testis,4.09E-10);RP11-10A14.5(Testis,5.05E-08)	RP11-115J16.2,rs525726,4.09E-10	RP11-115J16.2,rs898797,5.12E-24,Testis	r2(rs525726,rs898797)=0.146	RP11-10A14.5,rs525726,5.05E-08	RP11-10A14.5,rs3748136,2.61E-59,Whole_Blood	r2(rs525726,rs3748136)=0.012										8	10030287	rs525726	G	C	0.43	0.39	0.05	0.58							TFII-I				20kb 3' of RP11-1E4.1	24kb 5' of MSRA
137	rs555200	9888729	MSRA	8	10031219	LOC105379235	4.074e-32	7	RP11-115J16.2(Testis,2.12E-10);RP11-10A14.5(Testis,6.13E-08)	RP11-115J16.2,rs555200,2.12E-10	RP11-115J16.2,rs898797,5.12E-24,Testis	r2(rs555200,rs898797)=0.144	RP11-10A14.5,rs555200,6.13E-08	RP11-10A14.5,rs3748136,2.61E-59,Whole_Blood	r2(rs555200,rs3748136)=0.014										8	10031219	rs555200	A	G	0.48	0.4	0.05	0.58							RORalpha1				19kb 3' of RP11-1E4.1	23kb 5' of MSRA
138	rs3105738	9889914	MSRA	8	10032404	LOC105379235	3.715e-29	6	RP11-115J16.2(Testis,2.12E-10);RP11-10A14.5(Testis,6.13E-08)	RP11-115J16.2,rs3105738,2.12E-10	RP11-115J16.2,rs898797,5.12E-24,Testis	r2(rs3105738,rs898797)=0.144	RP11-10A14.5,rs3105738,6.13E-08	RP11-10A14.5,rs3748136,2.61E-59,Whole_Blood	r2(rs3105738,rs3748136)=0.013										8	10032404	rs3105738	A	T	0.42	0.4	0.05	0.58							CIZ,Mef2,RFX5		2 hits		18kb 3' of RP11-1E4.1	22kb 5' of MSRA
139	rs4598253	9890304	MSRA	8	10032794	LOC105379235	5.888e-28	6	RP11-115J16.2(Testis,2.12E-10);RP11-10A14.5(Testis,6.13E-08)	RP11-115J16.2,rs4598253,2.12E-10	RP11-115J16.2,rs898797,5.12E-24,Testis	r2(rs4598253,rs898797)=0.145	RP11-10A14.5,rs4598253,6.13E-08	RP11-10A14.5,rs3748136,2.61E-59,Whole_Blood	r2(rs4598253,rs3748136)=0.012										8	10032794	rs4598253	A	T	0.43	0.4	0.06	0.58							AIRE,Cdx,Sox				18kb 3' of RP11-1E4.1	22kb 5' of MSRA
140	rs658385	9892177	MSRA	8	10034667	LOC105379235	1.622e-25	7	RP11-115J16.2(Testis,2.17E-10)	RP11-115J16.2,rs658385,2.17E-10	RP11-115J16.2,rs898797,5.12E-24,Testis	r2(rs658385,rs898797)=0.147													8	10034667	rs658385	C	T	0.45	0.39	0.04	0.58							Cart1,TCF11::MafG				16kb 3' of RP11-1E4.1	20kb 5' of MSRA
141	rs34748716	9973718	MSRA	8	10116208	MSRA	1.175e-11	7	AF131215.2(Nerve_Tibial,5.11E-09);AF131215.9(Esophagus_Mucosa,2.75E-08);AF131215.2(Skin_Sun_Exposed_Lower_leg,5.38E-08);AF131215.2(Esophagus_Mucosa,7.64E-08);AF131215.9(Thyroid,9.84E-08)	AF131215.2,rs34748716,5.11E-09	AF131215.2,rs36089015,3.07E-31,Skin_Sun_Exposed_Lower_leg	r2(rs34748716,rs36089015)=0.09	AF131215.9,rs34748716,2.75E-08	AF131215.9,rs11778398,2.26E-30,Lung	r2(rs34748716,rs11778398)=0.077										8	10116208	rs34748716	C	T	0.19	0.33	0	0.44							Ets,Myb			5 hits	MSRA	MSRA	intronic
142	rs60384372	9974584	MSRA	8	10117074	MSRA	1.549e-14	7	AF131215.9(Esophagus_Mucosa,2.60E-10);AF131215.2(Esophagus_Mucosa,3.05E-10);AF131215.2(Skin_Sun_Exposed_Lower_leg,6.77E-09);AF131215.9(Nerve_Tibial,1.28E-08);AF131215.2(Nerve_Tibial,1.39E-08)	AF131215.9,rs60384372,2.60E-10	AF131215.9,rs11778398,2.26E-30,Lung	r2(rs60384372,rs11778398)=0.097	AF131215.2,rs60384372,3.05E-10	AF131215.2,rs36089015,3.07E-31,Skin_Sun_Exposed_Lower_leg	r2(rs60384372,rs36089015)=0.096										8	10117074	rs60384372	A	G	0.42	0.38	0.02	0.51							Myc			10 hits	MSRA	MSRA	intronic
143	rs17689007	9974824	MSRA	8	10117314	MSRA	1.413e-14	7	AF131215.9(Esophagus_Mucosa,1.23E-10);AF131215.2(Esophagus_Mucosa,2.86E-10);AF131215.2(Nerve_Tibial,6.24E-09);AF131215.2(Skin_Sun_Exposed_Lower_leg,1.33E-08);AF131215.9(Nerve_Tibial,4.20E-08)	AF131215.9,rs17689007,1.23E-10	AF131215.9,rs11778398,2.26E-30,Lung	r2(rs17689007,rs11778398)=0.101	AF131215.2,rs17689007,2.86E-10	AF131215.2,rs36089015,3.07E-31,Skin_Sun_Exposed_Lower_leg	r2(rs17689007,rs36089015)=0.096										8	10117314	rs17689007	G	A	0.38	0.38	0.02	0.5							Pou1f1			6 hits	MSRA	MSRA	intronic
144	rs17689037	9974858	MSRA	8	10117348	MSRA	7.762e-14	6	AF131215.9(Esophagus_Mucosa,4.86E-11);AF131215.2(Esophagus_Mucosa,9.48E-11);AF131215.2(Nerve_Tibial,5.33E-09);AF131215.2(Skin_Sun_Exposed_Lower_leg,8.94E-09);AF131215.9(Nerve_Tibial,3.26E-08)	AF131215.9,rs17689037,4.86E-11	AF131215.9,rs11778398,2.26E-30,Lung	r2(rs17689037,rs11778398)=0.101	AF131215.2,rs17689037,9.48E-11	AF131215.2,rs36089015,3.07E-31,Skin_Sun_Exposed_Lower_leg	r2(rs17689037,rs36089015)=0.097										8	10117348	rs17689037	C	T	0.39	0.38	0.02	0.5							Zec		2 hits	7 hits	MSRA	MSRA	intronic
145	rs4841282	9975604	MSRA	8	10118094	MSRA	3.02e-18	5	AF131215.9(Esophagus_Mucosa,9.27E-13);AF131215.2(Esophagus_Mucosa,1.45E-10);AF131215.9(Lung,1.93E-08);AF131215.9(Heart_Atrial_Appendage,2.80E-08);AF131215.9(Skin_Not_Sun_Exposed_Suprapubic,3.02E-08);AF131215.2(Skin_Sun_Exposed_Lower_leg,4.25E-08);AF131215.9(Nerve_Tibial,4.99E-08);RP11-10A14.5(Testis,9.54E-08)	AF131215.9,rs4841282,9.27E-13	AF131215.9,rs11778398,2.26E-30,Lung	r2(rs4841282,rs11778398)=0.131	AF131215.2,rs4841282,1.45E-10	AF131215.2,rs36089015,3.07E-31,Skin_Sun_Exposed_Lower_leg	r2(rs4841282,rs36089015)=0.107	RP11-10A14.5,rs4841282,9.54E-08	RP11-10A14.5,rs3748136,2.61E-59,Whole_Blood	r2(rs4841282,rs3748136)=0.007							8	10118094	rs4841282	C	A	0.38	0.58	0.95	0.42				BLD, ADRL	BRN		4 altered motifs			6 hits	MSRA	MSRA	intronic
146	rs6995837	9975675	MSRA	8	10118165	MSRA	1e-17	7	AF131215.9(Esophagus_Mucosa,3.40E-12);AF131215.2(Esophagus_Mucosa,5.44E-10);AF131215.9(Lung,1.77E-08);RP11-10A14.5(Testis,4.13E-08);AF131215.9(Nerve_Tibial,5.25E-08);AF131215.2(Skin_Sun_Exposed_Lower_leg,5.64E-08);AF131215.9(Skin_Not_Sun_Exposed_Suprapubic,5.86E-08);AF131215.9(Heart_Atrial_Appendage,9.38E-08)	AF131215.9,rs6995837,3.40E-12	AF131215.9,rs11778398,2.26E-30,Lung	r2(rs6995837,rs11778398)=0.14	AF131215.2,rs6995837,5.44E-10	AF131215.2,rs36089015,3.07E-31,Skin_Sun_Exposed_Lower_leg	r2(rs6995837,rs36089015)=0.113	RP11-10A14.5,rs6995837,4.13E-08	RP11-10A14.5,rs3748136,2.61E-59,Whole_Blood	r2(rs6995837,rs3748136)=0.008							8	10118165	rs6995837	T	C	0.43	0.59	0.95	0.43				BLD, ADRL	BRN		RBP-Jkappa			5 hits	MSRA	MSRA	intronic
147	rs6995859	9975709	MSRA	8	10118199	MSRA	9.12e-18	7	AF131215.9(Esophagus_Mucosa,3.40E-12);AF131215.2(Esophagus_Mucosa,5.44E-10);AF131215.9(Lung,1.77E-08);RP11-10A14.5(Testis,4.13E-08);AF131215.9(Nerve_Tibial,5.25E-08);AF131215.2(Skin_Sun_Exposed_Lower_leg,5.64E-08);AF131215.9(Skin_Not_Sun_Exposed_Suprapubic,5.86E-08);AF131215.9(Heart_Atrial_Appendage,9.38E-08)	AF131215.9,rs6995859,3.40E-12	AF131215.9,rs11778398,2.26E-30,Lung	r2(rs6995859,rs11778398)=0.14	AF131215.2,rs6995859,5.44E-10	AF131215.2,rs36089015,3.07E-31,Skin_Sun_Exposed_Lower_leg	r2(rs6995859,rs36089015)=0.113	RP11-10A14.5,rs6995859,4.13E-08	RP11-10A14.5,rs3748136,2.61E-59,Whole_Blood	r2(rs6995859,rs3748136)=0.008							8	10118199	rs6995859	T	A	0.43	0.59	0.95	0.43				BLD, ADRL	BLD,BRN		CEBPA,STAT			5 hits	MSRA	MSRA	intronic
148	rs55683917	9976479	MSRA	8	10118969	MSRA	1.288e-14	7	AF131215.9(Esophagus_Mucosa,1.33E-10);AF131215.9(Nerve_Tibial,1.40E-10);AF131215.2(Esophagus_Mucosa,2.64E-10);AF131215.2(Nerve_Tibial,3.82E-09);AF131215.2(Skin_Sun_Exposed_Lower_leg,4.37E-09);AF131215.9(Lung,4.55E-09);AF131215.9(Thyroid,1.80E-08);AF131215.2(Lung,3.31E-08)	AF131215.9,rs55683917,1.33E-10	AF131215.9,rs11778398,2.26E-30,Lung	r2(rs55683917,rs11778398)=0.096	AF131215.2,rs55683917,2.64E-10	AF131215.2,rs36089015,3.07E-31,Skin_Sun_Exposed_Lower_leg	r2(rs55683917,rs36089015)=0.096										8	10118969	rs55683917	C	G	0.36	0.36	0.02	0.49					OVRY		RXRA			10 hits	MSRA	MSRA	intronic
149	rs7843924	9976540	MSRA	8	10119030	MSRA	1.905e-18	6	AF131215.9(Esophagus_Mucosa,2.97E-12);AF131215.2(Esophagus_Mucosa,2.56E-10);AF131215.9(Lung,2.00E-08);AF131215.9(Skin_Not_Sun_Exposed_Suprapubic,2.27E-08);AF131215.9(Nerve_Tibial,3.18E-08);AF131215.9(Heart_Atrial_Appendage,4.03E-08);AF131215.2(Skin_Sun_Exposed_Lower_leg,4.39E-08);AF131215.2(Nerve_Tibial,8.55E-08)	AF131215.9,rs7843924,2.97E-12	AF131215.9,rs11778398,2.26E-30,Lung	r2(rs7843924,rs11778398)=0.142	AF131215.2,rs7843924,2.56E-10	AF131215.2,rs36089015,3.07E-31,Skin_Sun_Exposed_Lower_leg	r2(rs7843924,rs36089015)=0.116										8	10119030	rs7843924	C	T	0.43	0.59	0.95	0.42							13 altered motifs			6 hits	MSRA	MSRA	intronic
150	rs6601414	9976748	MSRA	8	10119238	MSRA	5.248e-18	6	AF131215.9(Esophagus_Mucosa,1.20E-12);AF131215.2(Esophagus_Mucosa,4.24E-10);AF131215.9(Nerve_Tibial,2.62E-08);AF131215.9(Heart_Atrial_Appendage,3.72E-08);AF131215.2(Skin_Sun_Exposed_Lower_leg,3.99E-08);AF131215.9(Lung,4.01E-08);AF131215.9(Skin_Not_Sun_Exposed_Suprapubic,5.58E-08)	AF131215.9,rs6601414,1.20E-12	AF131215.9,rs11778398,2.26E-30,Lung	r2(rs6601414,rs11778398)=0.133	AF131215.2,rs6601414,4.24E-10	AF131215.2,rs36089015,3.07E-31,Skin_Sun_Exposed_Lower_leg	r2(rs6601414,rs36089015)=0.111										8	10119238	rs6601414	G	A	0.39	0.58	0.95	0.42							Arid5a,Cdx2		3 hits	6 hits	MSRA	MSRA	intronic
151	rs6601415	9976805	MSRA	8	10119295	MSRA	1.288e-18	7	AF131215.9(Esophagus_Mucosa,1.40E-12);AF131215.2(Esophagus_Mucosa,3.45E-10);AF131215.9(Lung,2.96E-08);AF131215.9(Heart_Atrial_Appendage,3.72E-08);AF131215.9(Nerve_Tibial,3.73E-08);AF131215.2(Skin_Sun_Exposed_Lower_leg,4.68E-08);AF131215.9(Skin_Not_Sun_Exposed_Suprapubic,5.50E-08);RP11-10A14.5(Testis,6.26E-08)	AF131215.9,rs6601415,1.40E-12	AF131215.9,rs11778398,2.26E-30,Lung	r2(rs6601415,rs11778398)=0.133	AF131215.2,rs6601415,3.45E-10	AF131215.2,rs36089015,3.07E-31,Skin_Sun_Exposed_Lower_leg	r2(rs6601415,rs36089015)=0.111	RP11-10A14.5,rs6601415,6.26E-08	RP11-10A14.5,rs3748136,2.61E-59,Whole_Blood	r2(rs6601415,rs3748136)=0.007							8	10119295	rs6601415	C	A	0.38	0.58	0.95	0.42							Foxp3,Smad3,Smad			5 hits	MSRA	MSRA	intronic
152	rs6983332	9977918	MSRA	8	10120408	MSRA	5.623e-18	6	AF131215.9(Esophagus_Mucosa,1.64E-12);AF131215.2(Esophagus_Mucosa,3.15E-10);AF131215.9(Lung,1.84E-08);AF131215.9(Heart_Atrial_Appendage,2.43E-08);AF131215.2(Skin_Sun_Exposed_Lower_leg,3.45E-08);AF131215.9(Nerve_Tibial,3.56E-08);AF131215.9(Skin_Not_Sun_Exposed_Suprapubic,5.51E-08);AF131215.2(Nerve_Tibial,7.85E-08)	AF131215.9,rs6983332,1.64E-12	AF131215.9,rs11778398,2.26E-30,Lung	r2(rs6983332,rs11778398)=0.141	AF131215.2,rs6983332,3.15E-10	AF131215.2,rs36089015,3.07E-31,Skin_Sun_Exposed_Lower_leg	r2(rs6983332,rs36089015)=0.114										8	10120408	rs6983332	C	T	0.43	0.59	0.95	0.42							Hand1,Smad3		3 hits	8 hits	MSRA	MSRA	intronic
153	rs17689289	9977980	MSRA	8	10120470	MSRA	2.239e-14	6	AF131215.9(Esophagus_Mucosa,8.30E-11);AF131215.9(Nerve_Tibial,3.30E-10);AF131215.2(Esophagus_Mucosa,3.37E-10);AF131215.2(Skin_Sun_Exposed_Lower_leg,1.04E-08);AF131215.9(Thyroid,1.12E-08);AF131215.2(Nerve_Tibial,1.34E-08);RP11-981G7.6(Brain_Spinal_cord_cervical_c-1,2.11E-08);AF131215.9(Lung,2.70E-08)	AF131215.9,rs17689289,8.30E-11	AF131215.9,rs11778398,2.26E-30,Lung	r2(rs17689289,rs11778398)=0.096	AF131215.2,rs17689289,3.37E-10	AF131215.2,rs36089015,3.07E-31,Skin_Sun_Exposed_Lower_leg	r2(rs17689289,rs36089015)=0.097	RP11-981G7.6,rs17689289,2.11E-08	RP11-981G7.6,rs3750314,2.14E-21,Esophagus_Muscularis	r2(rs17689289,rs3750314)=0.037							8	10120470	rs17689289	C	G	0.36	0.36	0.02	0.49					BRN		7 altered motifs		2 hits	10 hits	MSRA	MSRA	intronic
154	rs6986885	9978471	MSRA	8	10120961	MSRA	5.888e-14	6	AF131215.9(Esophagus_Mucosa,6.37E-12);AF131215.2(Esophagus_Mucosa,3.13E-09);AF131215.9(Nerve_Tibial,2.93E-08)	AF131215.9,rs6986885,6.37E-12	AF131215.9,rs11778398,2.26E-30,Lung	r2(rs6986885,rs11778398)=0.12	AF131215.2,rs6986885,3.13E-09	AF131215.2,rs36089015,3.07E-31,Skin_Sun_Exposed_Lower_leg	r2(rs6986885,rs36089015)=0.095										8	10120961	rs6986885	G	A	0.43	0.59	0.95	0.45							22 altered motifs			5 hits	MSRA	MSRA	intronic
155	rs6986911	9978523	MSRA	8	10121013	MSRA	1.778e-18	6	AF131215.9(Esophagus_Mucosa,3.42E-12);AF131215.2(Esophagus_Mucosa,7.64E-10);AF131215.9(Lung,1.57E-08);RP11-10A14.5(Testis,4.10E-08);AF131215.9(Nerve_Tibial,5.14E-08);AF131215.2(Skin_Sun_Exposed_Lower_leg,6.70E-08);AF131215.9(Heart_Atrial_Appendage,6.99E-08)	AF131215.9,rs6986911,3.42E-12	AF131215.9,rs11778398,2.26E-30,Lung	r2(rs6986911,rs11778398)=0.14	AF131215.2,rs6986911,7.64E-10	AF131215.2,rs36089015,3.07E-31,Skin_Sun_Exposed_Lower_leg	r2(rs6986911,rs36089015)=0.114	RP11-10A14.5,rs6986911,4.10E-08	RP11-10A14.5,rs3748136,2.61E-59,Whole_Blood	r2(rs6986911,rs3748136)=0.008							8	10121013	rs6986911	G	A	0.43	0.59	0.95	0.42							5 altered motifs			5 hits	MSRA	MSRA	intronic
156	rs13254175	9978772	MSRA	8	10121262	MSRA	2.042e-18	6	AF131215.9(Esophagus_Mucosa,3.42E-12);AF131215.2(Esophagus_Mucosa,7.64E-10);AF131215.9(Lung,1.57E-08);RP11-10A14.5(Testis,4.10E-08);AF131215.9(Nerve_Tibial,5.14E-08);AF131215.2(Skin_Sun_Exposed_Lower_leg,6.70E-08);AF131215.9(Heart_Atrial_Appendage,6.99E-08)	AF131215.9,rs13254175,3.42E-12	AF131215.9,rs11778398,2.26E-30,Lung	r2(rs13254175,rs11778398)=0.14	AF131215.2,rs13254175,7.64E-10	AF131215.2,rs36089015,3.07E-31,Skin_Sun_Exposed_Lower_leg	r2(rs13254175,rs36089015)=0.114	RP11-10A14.5,rs13254175,4.10E-08	RP11-10A14.5,rs3748136,2.61E-59,Whole_Blood	r2(rs13254175,rs3748136)=0.008							8	10121262	rs13254175	C	T	0.43	0.59	0.95	0.42					BRN		ATF3,NRSF		2 hits	6 hits	MSRA	MSRA	intronic
157	rs12678797	9978919	MSRA	8	10121409	MSRA	1.549e-18	6	AF131215.9(Esophagus_Mucosa,3.42E-12);AF131215.2(Esophagus_Mucosa,7.64E-10);AF131215.9(Lung,1.57E-08);RP11-10A14.5(Testis,4.10E-08);AF131215.9(Nerve_Tibial,5.14E-08);AF131215.2(Skin_Sun_Exposed_Lower_leg,6.70E-08);AF131215.9(Heart_Atrial_Appendage,6.99E-08)	AF131215.9,rs12678797,3.42E-12	AF131215.9,rs11778398,2.26E-30,Lung	r2(rs12678797,rs11778398)=0.14	AF131215.2,rs12678797,7.64E-10	AF131215.2,rs36089015,3.07E-31,Skin_Sun_Exposed_Lower_leg	r2(rs12678797,rs36089015)=0.114	RP11-10A14.5,rs12678797,4.10E-08	RP11-10A14.5,rs3748136,2.61E-59,Whole_Blood	r2(rs12678797,rs3748136)=0.008							8	10121409	rs12678797	G	A	0.43	0.59	0.95	0.42					SKIN		BATF,Irf,ZBRK1		2 hits	6 hits	MSRA	MSRA	intronic
158	rs12678800	9978940	MSRA	8	10121430	MSRA	1.479e-18	7	AF131215.9(Esophagus_Mucosa,4.47E-12);AF131215.2(Esophagus_Mucosa,1.35E-09);AF131215.9(Lung,1.57E-08);AF131215.9(Nerve_Tibial,4.49E-08);AF131215.9(Heart_Atrial_Appendage,6.99E-08);RP11-10A14.5(Testis,7.27E-08);AF131215.2(Skin_Sun_Exposed_Lower_leg,8.86E-08)	AF131215.9,rs12678800,4.47E-12	AF131215.9,rs11778398,2.26E-30,Lung	r2(rs12678800,rs11778398)=0.14	AF131215.2,rs12678800,1.35E-09	AF131215.2,rs36089015,3.07E-31,Skin_Sun_Exposed_Lower_leg	r2(rs12678800,rs36089015)=0.116	RP11-10A14.5,rs12678800,7.27E-08	RP11-10A14.5,rs3748136,2.61E-59,Whole_Blood	r2(rs12678800,rs3748136)=0.008							8	10121430	rs12678800	G	A	0.43	0.59	0.95	0.42					SKIN					6 hits	MSRA	MSRA	intronic
159	rs13264586	9979385	MSRA	8	10121875	MSRA	2.399e-17	6	AF131215.9(Esophagus_Mucosa,5.63E-12);AF131215.2(Esophagus_Mucosa,1.07E-09);AF131215.9(Lung,1.11E-08);AF131215.9(Skin_Not_Sun_Exposed_Suprapubic,4.40E-08);RP11-10A14.5(Testis,6.14E-08);AF131215.9(Nerve_Tibial,7.22E-08);AF131215.9(Heart_Atrial_Appendage,7.50E-08);AF131215.2(Lung,9.71E-08)	AF131215.9,rs13264586,5.63E-12	AF131215.9,rs11778398,2.26E-30,Lung	r2(rs13264586,rs11778398)=0.14	AF131215.2,rs13264586,1.07E-09	AF131215.2,rs36089015,3.07E-31,Skin_Sun_Exposed_Lower_leg	r2(rs13264586,rs36089015)=0.115	RP11-10A14.5,rs13264586,6.14E-08	RP11-10A14.5,rs3748136,2.61E-59,Whole_Blood	r2(rs13264586,rs3748136)=0.008							8	10121875	rs13264586	T	C	0.42	0.58	0.95	0.42							Sox			5 hits	MSRA	MSRA	intronic
160	rs2062331	9979992	MSRA	8	10122482	MSRA	1.202e-18	6	AF131215.9(Esophagus_Mucosa,1.82E-12);AF131215.2(Esophagus_Mucosa,5.13E-09);AF131215.9(Lung,4.84E-08);AF131215.9(Thyroid,6.17E-08);AF131215.9(Heart_Atrial_Appendage,6.53E-08);RP11-10A14.5(Testis,9.37E-08)	AF131215.9,rs2062331,1.82E-12	AF131215.9,rs11778398,2.26E-30,Lung	r2(rs2062331,rs11778398)=0.14	AF131215.2,rs2062331,5.13E-09	AF131215.2,rs36089015,3.07E-31,Skin_Sun_Exposed_Lower_leg	r2(rs2062331,rs36089015)=0.119	RP11-10A14.5,rs2062331,9.37E-08	RP11-10A14.5,rs3748136,2.61E-59,Whole_Blood	r2(rs2062331,rs3748136)=0.008							8	10122482	rs2062331	A	G	0.46	0.59	0.95	0.42							Nkx2,Nkx3,TEF-1		2 hits	5 hits	MSRA	MSRA	intronic
161	rs2062332	9980024	MSRA	8	10122514	MSRA	1.349e-18	7	AF131215.9(Esophagus_Mucosa,5.88E-12);AF131215.2(Esophagus_Mucosa,1.56E-09);AF131215.9(Lung,1.02E-08);RP11-10A14.5(Testis,6.14E-08);AF131215.9(Skin_Not_Sun_Exposed_Suprapubic,7.17E-08);AF131215.9(Nerve_Tibial,7.19E-08);AF131215.2(Skin_Sun_Exposed_Lower_leg,9.63E-08)	AF131215.9,rs2062332,5.88E-12	AF131215.9,rs11778398,2.26E-30,Lung	r2(rs2062332,rs11778398)=0.14	AF131215.2,rs2062332,1.56E-09	AF131215.2,rs36089015,3.07E-31,Skin_Sun_Exposed_Lower_leg	r2(rs2062332,rs36089015)=0.116	RP11-10A14.5,rs2062332,6.14E-08	RP11-10A14.5,rs3748136,2.61E-59,Whole_Blood	r2(rs2062332,rs3748136)=0.007							8	10122514	rs2062332	G	A	0.44	0.59	0.95	0.42							5 altered motifs			5 hits	MSRA	MSRA	intronic
162	rs2062333	9981149	MSRA	8	10123639	MSRA	4.266e-14	6	AF131215.9(Esophagus_Mucosa,3.71E-10);AF131215.2(Esophagus_Mucosa,8.72E-08)	AF131215.9,rs2062333,3.71E-10	AF131215.9,rs11778398,2.26E-30,Lung	r2(rs2062333,rs11778398)=0.118	AF131215.2,rs2062333,8.72E-08	AF131215.2,rs36089015,3.07E-31,Skin_Sun_Exposed_Lower_leg	r2(rs2062333,rs36089015)=0.106										8	10123639	rs2062333	A	G	0.54	0.61	0.97	0.44							6 altered motifs			4 hits	MSRA	MSRA	intronic
163	rs17746227	9981654	MSRA	8	10124144	MSRA	1.514e-12	7	AF131215.2(Nerve_Tibial,3.21E-09);AF131215.9(Esophagus_Mucosa,1.97E-08);AF131215.9(Nerve_Tibial,1.97E-08);AF131215.2(Esophagus_Mucosa,2.06E-08);AF131215.9(Thyroid,2.65E-08);AF131215.2(Skin_Sun_Exposed_Lower_leg,3.83E-08)	AF131215.2,rs17746227,3.21E-09	AF131215.2,rs36089015,3.07E-31,Skin_Sun_Exposed_Lower_leg	r2(rs17746227,rs36089015)=0.093	AF131215.9,rs17746227,1.97E-08	AF131215.9,rs11778398,2.26E-30,Lung	r2(rs17746227,rs11778398)=0.079										8	10124144	rs17746227	T	C	0.19	0.34	0	0.45				BLD			Nanog			6 hits	MSRA	MSRA	intronic
164	rs17746245	9981686	MSRA	8	10124176	MSRA	1.047e-11	7	AF131215.2(Nerve_Tibial,2.10E-09);AF131215.9(Esophagus_Mucosa,1.10E-08);AF131215.2(Skin_Sun_Exposed_Lower_leg,2.15E-08);AF131215.2(Esophagus_Mucosa,2.46E-08);AF131215.9(Nerve_Tibial,2.51E-08);AF131215.9(Thyroid,4.40E-08)	AF131215.2,rs17746245,2.10E-09	AF131215.2,rs36089015,3.07E-31,Skin_Sun_Exposed_Lower_leg	r2(rs17746245,rs36089015)=0.095	AF131215.9,rs17746245,1.10E-08	AF131215.9,rs11778398,2.26E-30,Lung	r2(rs17746245,rs11778398)=0.083										8	10124176	rs17746245	G	T	0.18	0.34	0	0.46				BLD			EBF,NF-kappaB,SRF		1 hit	5 hits	MSRA	MSRA	intronic
165	rs17689674	9981854	MSRA	8	10124344	MSRA	1.288e-18	6	AF131215.9(Esophagus_Mucosa,3.50E-12);AF131215.2(Esophagus_Mucosa,2.32E-09);AF131215.2(Skin_Sun_Exposed_Lower_leg,1.20E-08);AF131215.9(Skin_Not_Sun_Exposed_Suprapubic,2.26E-08);AF131215.9(Thyroid,2.35E-08);RP11-10A14.5(Testis,3.39E-08);AF131215.2(Nerve_Tibial,4.19E-08);AF131215.9(Lung,4.58E-08)	AF131215.9,rs17689674,3.50E-12	AF131215.9,rs11778398,2.26E-30,Lung	r2(rs17689674,rs11778398)=0.125	AF131215.2,rs17689674,2.32E-09	AF131215.2,rs36089015,3.07E-31,Skin_Sun_Exposed_Lower_leg	r2(rs17689674,rs36089015)=0.114	RP11-10A14.5,rs17689674,3.39E-08	RP11-10A14.5,rs3748136,2.61E-59,Whole_Blood	r2(rs17689674,rs3748136)=0.006							8	10124344	rs17689674	C	A	0.53	0.59	0.97	0.41				BLD			EBF,Ik-2,LUN-1			6 hits	MSRA	MSRA	intronic
166	rs13282106	9981900	MSRA	8	10124390	MSRA	3.09e-18	7	AF131215.9(Esophagus_Mucosa,1.51E-11);AF131215.2(Esophagus_Mucosa,8.14E-09);RP11-10A14.5(Testis,1.56E-08);AF131215.2(Skin_Sun_Exposed_Lower_leg,2.61E-08);AF131215.9(Thyroid,4.07E-08);AF131215.9(Lung,5.46E-08);AF131215.9(Skin_Not_Sun_Exposed_Suprapubic,6.39E-08)	AF131215.9,rs13282106,1.51E-11	AF131215.9,rs11778398,2.26E-30,Lung	r2(rs13282106,rs11778398)=0.125	AF131215.2,rs13282106,8.14E-09	AF131215.2,rs36089015,3.07E-31,Skin_Sun_Exposed_Lower_leg	r2(rs13282106,rs36089015)=0.116	RP11-10A14.5,rs13282106,1.56E-08	RP11-10A14.5,rs3748136,2.61E-59,Whole_Blood	r2(rs13282106,rs3748136)=0.006							8	10124390	rs13282106	G	T	0.54	0.6	0.97	0.42				BLD						5 hits	MSRA	MSRA	intronic
167	rs13259465	9982953	MSRA	8	10125443	MSRA	2.188e-12	7	AF131215.9(Esophagus_Mucosa,1.09E-08);AF131215.2(Nerve_Tibial,1.65E-08);AF131215.2(Skin_Sun_Exposed_Lower_leg,2.71E-08);AF131215.2(Esophagus_Mucosa,3.11E-08);AF131215.9(Nerve_Tibial,3.38E-08);AF131215.9(Thyroid,7.71E-08);MSRA(Brain_Spinal_cord_cervical_c-1,8.61E-08)	AF131215.9,rs13259465,1.09E-08	AF131215.9,rs11778398,2.26E-30,Lung	r2(rs13259465,rs11778398)=0.088	AF131215.2,rs13259465,1.65E-08	AF131215.2,rs36089015,3.07E-31,Skin_Sun_Exposed_Lower_leg	r2(rs13259465,rs36089015)=0.1	MSRA,rs13259465,8.61E-08	MSRA,rs7833387,7.50E-10,Brain_Spinal_cord_cervical_c-1	r2(rs13259465,rs7833387)=0.377							8	10125443	rs13259465	C	G	0.16	0.34	0	0.46				ESDR			ERalpha-a,NF-kappaB			6 hits	MSRA	MSRA	intronic
168	rs6985941	9983179	MSRA	8	10125669	MSRA	3.236e-13	5	AF131215.2(Nerve_Tibial,5.18E-09);AF131215.9(Nerve_Tibial,1.38E-08);AF131215.9(Esophagus_Mucosa,1.93E-08);AF131215.2(Esophagus_Mucosa,2.35E-08);AF131215.2(Skin_Sun_Exposed_Lower_leg,3.91E-08);AF131215.9(Thyroid,4.93E-08)	AF131215.2,rs6985941,5.18E-09	AF131215.2,rs36089015,3.07E-31,Skin_Sun_Exposed_Lower_leg	r2(rs6985941,rs36089015)=0.095	AF131215.9,rs6985941,1.38E-08	AF131215.9,rs11778398,2.26E-30,Lung	r2(rs6985941,rs11778398)=0.081										8	10125669	rs6985941	C	T	0.18	0.33	0	0.46					IPSC	CEBPB	NRSF			6 hits	MSRA	MSRA	intronic
169	rs1484639	9983224	MSRA	8	10125714	MSRA	1.698e-19	5	AF131215.9(Esophagus_Mucosa,1.64E-11);AF131215.2(Esophagus_Mucosa,3.78E-09);RP11-10A14.5(Testis,8.81E-09);AF131215.2(Skin_Sun_Exposed_Lower_leg,2.33E-08);AF131215.9(Lung,4.61E-08)	AF131215.9,rs1484639,1.64E-11	AF131215.9,rs11778398,2.26E-30,Lung	r2(rs1484639,rs11778398)=0.116	AF131215.2,rs1484639,3.78E-09	AF131215.2,rs36089015,3.07E-31,Skin_Sun_Exposed_Lower_leg	r2(rs1484639,rs36089015)=0.106	RP11-10A14.5,rs1484639,8.81E-09	RP11-10A14.5,rs3748136,2.61E-59,Whole_Blood	r2(rs1484639,rs3748136)=0.005							8	10125714	rs1484639	T	G	0.49	0.6	0.97	0.42						CEBPB	6 altered motifs			6 hits	MSRA	MSRA	intronic
170	rs1484640	9983243	MSRA	8	10125733	MSRA	3.802e-19	5	AF131215.9(Esophagus_Mucosa,5.98E-12);AF131215.2(Esophagus_Mucosa,5.93E-10);RP11-10A14.5(Testis,2.23E-08);AF131215.2(Skin_Sun_Exposed_Lower_leg,2.27E-08);AF131215.9(Skin_Not_Sun_Exposed_Suprapubic,2.45E-08);AF131215.9(Lung,4.25E-08)	AF131215.9,rs1484640,5.98E-12	AF131215.9,rs11778398,2.26E-30,Lung	r2(rs1484640,rs11778398)=0.113	AF131215.2,rs1484640,5.93E-10	AF131215.2,rs36089015,3.07E-31,Skin_Sun_Exposed_Lower_leg	r2(rs1484640,rs36089015)=0.104	RP11-10A14.5,rs1484640,2.23E-08	RP11-10A14.5,rs3748136,2.61E-59,Whole_Blood	r2(rs1484640,rs3748136)=0.005							8	10125733	rs1484640	G	T	0.48	0.6	0.97	0.41						CEBPB	Nkx2,Sox			6 hits	MSRA	MSRA	intronic
171	rs1351876	9984777	MSRA	8	10127267	MSRA	5.495e-18	1f	AF131215.9(Esophagus_Mucosa,2.12E-12);AF131215.2(Esophagus_Mucosa,9.64E-10);RP11-10A14.5(Testis,1.49E-08);AF131215.2(Skin_Sun_Exposed_Lower_leg,4.59E-08);AF131215.9(Lung,4.66E-08)	AF131215.9,rs1351876,2.12E-12	AF131215.9,rs11778398,2.26E-30,Lung	r2(rs1351876,rs11778398)=0.131	AF131215.2,rs1351876,9.64E-10	AF131215.2,rs36089015,3.07E-31,Skin_Sun_Exposed_Lower_leg	r2(rs1351876,rs36089015)=0.107	RP11-10A14.5,rs1351876,1.49E-08	RP11-10A14.5,rs3748136,2.61E-59,Whole_Blood	r2(rs1351876,rs3748136)=0.006							8	10127267	rs1351876	G	A	0.38	0.59	0.95	0.42						MAFK	7 altered motifs		2 hits	5 hits	MSRA	MSRA	intronic
172	rs1484641	9986524	MSRA	8	10129014	MSRA	2.57e-12	7	AF131215.2(Nerve_Tibial,1.19E-08);AF131215.2(Esophagus_Mucosa,1.82E-08);AF131215.9(Esophagus_Mucosa,2.38E-08);AF131215.2(Skin_Sun_Exposed_Lower_leg,3.79E-08);MSRA(Brain_Spinal_cord_cervical_c-1,8.61E-08);AF131215.9(Thyroid,9.83E-08)	AF131215.2,rs1484641,1.19E-08	AF131215.2,rs36089015,3.07E-31,Skin_Sun_Exposed_Lower_leg	r2(rs1484641,rs36089015)=0.089	AF131215.9,rs1484641,2.38E-08	AF131215.9,rs11778398,2.26E-30,Lung	r2(rs1484641,rs11778398)=0.076	MSRA,rs1484641,8.61E-08	MSRA,rs7833387,7.50E-10,Brain_Spinal_cord_cervical_c-1	r2(rs1484641,rs7833387)=0.357							8	10129014	rs1484641	C	A	0.2	0.34	0	0.46				LNG, SKIN	BLD		HP1-site-factor,Nkx2,RBP-Jkappa		2 hits	6 hits	MSRA	MSRA	intronic
173	rs3885723	9991661	MSRA	8	10134151	MSRA	3.09e-11	5	AF131215.9(Nerve_Tibial,1.08E-09);AF131215.9(Esophagus_Mucosa,1.15E-08);AF131215.2(Nerve_Tibial,1.52E-08);AF131215.2(Skin_Sun_Exposed_Lower_leg,9.16E-08)	AF131215.9,rs3885723,1.08E-09	AF131215.9,rs11778398,2.26E-30,Lung	r2(rs3885723,rs11778398)=0.08	AF131215.2,rs3885723,1.52E-08	AF131215.2,rs36089015,3.07E-31,Skin_Sun_Exposed_Lower_leg	r2(rs3885723,rs36089015)=0.066										8	10134151	rs3885723	A	C	0.62	0.36	0.02	0.48				8 tissues			5 altered motifs		1 hit	8 hits	MSRA	MSRA	intronic
174	rs34990153	9996389	MSRA	8	10138879	MSRA	7.943e-14	5	AF131215.2(Esophagus_Mucosa,6.75E-10);AF131215.9(Esophagus_Mucosa,1.11E-09);AF131215.2(Nerve_Tibial,2.91E-09);AF131215.9(Nerve_Tibial,3.70E-09);AF131215.9(Thyroid,1.12E-08);AF131215.2(Skin_Sun_Exposed_Lower_leg,1.33E-08);AF131215.9(Lung,2.20E-08);AF131215.2(Lung,6.48E-08)	AF131215.2,rs34990153,6.75E-10	AF131215.2,rs36089015,3.07E-31,Skin_Sun_Exposed_Lower_leg	r2(rs34990153,rs36089015)=0.098	AF131215.9,rs34990153,1.11E-09	AF131215.9,rs11778398,2.26E-30,Lung	r2(rs34990153,rs11778398)=0.085										8	10138879	rs34990153	A	G	0.2	0.35	0	0.48			FAT, LIV, BRN	15 tissues	13 tissues		Ascl2,Mef2,NRSF			8 hits	MSRA	MSRA	intronic
175	rs28630503	10009016	MSRA	8	10151506	MSRA	3.802e-11	7	AF131215.9(Esophagus_Mucosa,5.61E-12);AF131215.9(Thyroid,8.85E-11);AF131215.9(Lung,6.79E-10);AF131215.2(Esophagus_Mucosa,4.01E-09);AF131215.9(Heart_Atrial_Appendage,2.18E-08);AF131215.2(Testis,7.94E-08)	AF131215.9,rs28630503,5.61E-12	AF131215.9,rs11778398,2.26E-30,Lung	r2(rs28630503,rs11778398)=0.043	AF131215.2,rs28630503,4.01E-09	AF131215.2,rs36089015,3.07E-31,Skin_Sun_Exposed_Lower_leg	r2(rs28630503,rs36089015)=0.041										8	10151506	rs28630503	C	T	0.3	0.42	0.46	0.27				14 tissues						6 hits	MSRA	MSRA	intronic
176	rs11986122	10009949	MSRA	8	10152439	MSRA	1.778e-19	4	AF131215.9(Esophagus_Mucosa,1.20E-18);AF131215.9(Thyroid,1.59E-14);AF131215.2(Esophagus_Mucosa,2.82E-13);AF131215.2(Skin_Sun_Exposed_Lower_leg,2.99E-12);AF131215.9(Heart_Atrial_Appendage,6.91E-12);AF131215.9(Lung,9.11E-11);AF131215.9(Skin_Sun_Exposed_Lower_leg,5.57E-10);AF131215.2(Heart_Atrial_Appendage,9.19E-10);AF131215.2(Thyroid,9.54E-10);AF131215.9(Skin_Not_Sun_Exposed_Suprapubic,1.14E-09);AF…	AF131215.9,rs11986122,1.20E-18	AF131215.9,rs11778398,2.26E-30,Lung	r2(rs11986122,rs11778398)=0.134	AF131215.2,rs11986122,2.82E-13	AF131215.2,rs36089015,3.07E-31,Skin_Sun_Exposed_Lower_leg	r2(rs11986122,rs36089015)=0.112	RP11-10A14.5,rs11986122,4.48E-08	RP11-10A14.5,rs3748136,2.61E-59,Whole_Blood	r2(rs11986122,rs3748136)=0.007							8	10152439	rs11986122	C	G	0.33	0.58	0.96	0.39				17 tissues	47 tissues	13 bound proteins	Foxf1			16 hits	MSRA	MSRA	intronic
177	rs11993089	10009952	MSRA	8	10152442	MSRA	6.166e-23	4	AF131215.9(Esophagus_Mucosa,1.20E-18);AF131215.9(Thyroid,1.59E-14);AF131215.2(Esophagus_Mucosa,2.82E-13);AF131215.2(Skin_Sun_Exposed_Lower_leg,2.99E-12);AF131215.9(Heart_Atrial_Appendage,6.91E-12);AF131215.9(Lung,9.11E-11);AF131215.9(Skin_Sun_Exposed_Lower_leg,5.57E-10);AF131215.2(Heart_Atrial_Appendage,9.19E-10);AF131215.2(Thyroid,9.54E-10);AF131215.9(Skin_Not_Sun_Exposed_Suprapubic,1.14E-09);AF…	AF131215.9,rs11993089,1.20E-18	AF131215.9,rs11778398,2.26E-30,Lung	r2(rs11993089,rs11778398)=0.134	AF131215.2,rs11993089,2.82E-13	AF131215.2,rs36089015,3.07E-31,Skin_Sun_Exposed_Lower_leg	r2(rs11993089,rs36089015)=0.112	RP11-10A14.5,rs11993089,4.48E-08	RP11-10A14.5,rs3748136,2.61E-59,Whole_Blood	r2(rs11993089,rs3748136)=0.007							8	10152442	rs11993089	G	T	0.32	0.58	0.96	0.39				17 tissues	47 tissues	13 bound proteins	ERalpha-a,ZBTB33			16 hits	MSRA	MSRA	intronic
178	rs62488738	10012232	MSRA	8	10154722	MSRA	7.079e-11	6	AF131215.9(Esophagus_Mucosa,2.18E-12);AF131215.9(Thyroid,8.41E-11);AF131215.9(Lung,4.58E-10);AF131215.9(Stomach,4.26E-08)	AF131215.9,rs62488738,2.18E-12	AF131215.9,rs11778398,2.26E-30,Lung	r2(rs62488738,rs11778398)=0.048													8	10154722	rs62488738	C	G	0.17	0.37	0.45	0.27							DMRT1,DMRT4,Sox			7 hits	MSRA	MSRA	intronic
179	rs7017349	10077241	MSRA	8	10219731	MSRA	5.248e-18	7	AF131215.2(Skin_Sun_Exposed_Lower_leg,4.43E-11);AF131215.9(Lung,4.46E-11);AF131215.2(Nerve_Tibial,5.91E-11);AF131215.2(Esophagus_Mucosa,6.97E-11);AF131215.9(Nerve_Tibial,4.22E-10);AF131215.9(Esophagus_Mucosa,6.04E-10);AF131215.9(Thyroid,8.98E-10);AF131215.9(Skin_Sun_Exposed_Lower_leg,1.03E-09);AF131215.2(Thyroid,2.01E-08);AF131215.2(Lung,3.28E-08);AF131215.9(Breast_Mammary_Tissue,5.07E-08)	AF131215.2,rs7017349,4.43E-11	AF131215.2,rs36089015,3.07E-31,Skin_Sun_Exposed_Lower_leg	r2(rs7017349,rs36089015)=0.113	AF131215.9,rs7017349,4.46E-11	AF131215.9,rs11778398,2.26E-30,Lung	r2(rs7017349,rs11778398)=0.093										8	10219731	rs7017349	G	A	0.83	0.68	0.99	0.54				BRN			Rad21,SMC3			9 hits	MSRA	MSRA	intronic
180	rs4840467	10079637	MSRA	8	10222127	MSRA	3.02e-13	7	AF131215.2(Skin_Sun_Exposed_Lower_leg,2.87E-11);AF131215.2(Esophagus_Mucosa,6.83E-11);AF131215.2(Nerve_Tibial,9.00E-11);AF131215.9(Lung,1.32E-10);AF131215.9(Esophagus_Mucosa,5.47E-10);AF131215.9(Skin_Sun_Exposed_Lower_leg,1.37E-09);AF131215.9(Thyroid,5.43E-09);AF131215.9(Nerve_Tibial,6.26E-09);AF131215.2(Thyroid,1.45E-08);AF131215.2(Lung,5.87E-08);AF131215.9(Heart_Atrial_Appendage,7.11E-08)	AF131215.2,rs4840467,2.87E-11	AF131215.2,rs36089015,3.07E-31,Skin_Sun_Exposed_Lower_leg	r2(rs4840467,rs36089015)=0.104	AF131215.9,rs4840467,1.32E-10	AF131215.9,rs11778398,2.26E-30,Lung	r2(rs4840467,rs11778398)=0.089										8	10222127	rs4840467	A	G	0.84	0.7	1	0.57							YY1			10 hits	MSRA	MSRA	intronic
181	rs12156030	10097522	MSRA	8	10240012	MSRA	1.66e-17	5	AF131215.9(Esophagus_Mucosa,2.38E-13);AF131215.2(Nerve_Tibial,2.06E-12);AF131215.9(Nerve_Tibial,8.31E-12);AF131215.9(Thyroid,9.79E-12);AF131215.9(Lung,2.50E-09);AF131215.2(Esophagus_Mucosa,2.58E-09);AF131215.2(Thyroid,2.58E-09);AF131215.2(Skin_Sun_Exposed_Lower_leg,1.80E-08);AF131215.2(Esophagus_Gastroesophageal_Junction,2.44E-08);AF131215.2(Testis,3.74E-08);AF131215.2(Lung,4.13E-08)	AF131215.9,rs12156030,2.38E-13	AF131215.9,rs11778398,2.26E-30,Lung	r2(rs12156030,rs11778398)=0.109	AF131215.2,rs12156030,2.06E-12	AF131215.2,rs36089015,3.07E-31,Skin_Sun_Exposed_Lower_leg	r2(rs12156030,rs36089015)=0.145										8	10240012	rs12156030	C	G	0.05	0.31	0	0.44				SKIN	5 tissues		9 altered motifs			11 hits	MSRA	MSRA	intronic
182	rs13263482	10098230	MSRA	8	10240720	MSRA	1.23e-18	7	AF131215.9(Esophagus_Mucosa,1.18E-12);AF131215.2(Nerve_Tibial,1.34E-12);AF131215.9(Nerve_Tibial,1.89E-11);AF131215.9(Thyroid,1.94E-11);AF131215.2(Thyroid,2.16E-09);AF131215.2(Esophagus_Mucosa,2.25E-09);AF131215.2(Esophagus_Gastroesophageal_Junction,5.89E-09);AF131215.9(Lung,6.24E-09);AF131215.9(Pancreas,5.43E-08);AF131215.2(Testis,9.03E-08);AF131215.2(Lung,9.79E-08)	AF131215.9,rs13263482,1.18E-12	AF131215.9,rs11778398,2.26E-30,Lung	r2(rs13263482,rs11778398)=0.108	AF131215.2,rs13263482,1.34E-12	AF131215.2,rs36089015,3.07E-31,Skin_Sun_Exposed_Lower_leg	r2(rs13263482,rs36089015)=0.142										8	10240720	rs13263482	G	A	0.05	0.31	0	0.43							Ik-1			9 hits	MSRA	MSRA	intronic
183	rs13263803	10098347	MSRA	8	10240837	MSRA	5.495e-19	6	AF131215.9(Esophagus_Mucosa,5.52E-13);AF131215.2(Nerve_Tibial,1.68E-12);AF131215.9(Nerve_Tibial,1.07E-11);AF131215.9(Thyroid,1.34E-11);AF131215.9(Lung,2.01E-09);AF131215.2(Esophagus_Mucosa,2.32E-09);AF131215.2(Thyroid,2.42E-09);AF131215.2(Testis,7.02E-09);AF131215.2(Esophagus_Gastroesophageal_Junction,9.15E-09);AF131215.9(Pancreas,1.34E-08);AF131215.2(Lung,4.34E-08)	AF131215.9,rs13263803,5.52E-13	AF131215.9,rs11778398,2.26E-30,Lung	r2(rs13263803,rs11778398)=0.107	AF131215.2,rs13263803,1.68E-12	AF131215.2,rs36089015,3.07E-31,Skin_Sun_Exposed_Lower_leg	r2(rs13263803,rs36089015)=0.141										8	10240837	rs13263803	G	A	0.05	0.31	0	0.44							22 altered motifs			9 hits	MSRA	MSRA	intronic
184	rs12156387	10098902	MSRA	8	10241392	MSRA	1.66e-17	7	AF131215.9(Esophagus_Mucosa,9.72E-14);AF131215.2(Nerve_Tibial,8.30E-13);AF131215.9(Thyroid,7.26E-12);AF131215.9(Nerve_Tibial,9.99E-12);AF131215.2(Thyroid,1.01E-09);AF131215.2(Esophagus_Mucosa,1.63E-09);AF131215.9(Lung,1.85E-09);AF131215.2(Esophagus_Gastroesophageal_Junction,9.26E-09);AF131215.2(Skin_Sun_Exposed_Lower_leg,3.10E-08);AF131215.2(Lung,4.61E-08);AF131215.2(Testis,7.10E-08)	AF131215.9,rs12156387,9.72E-14	AF131215.9,rs11778398,2.26E-30,Lung	r2(rs12156387,rs11778398)=0.11	AF131215.2,rs12156387,8.30E-13	AF131215.2,rs36089015,3.07E-31,Skin_Sun_Exposed_Lower_leg	r2(rs12156387,rs36089015)=0.144										8	10241392	rs12156387	A	G	0.05	0.3	0	0.43							GCM,Hbp1,Rad21			10 hits	MSRA	MSRA	intronic
185	rs34919878	10099504	MSRA	8	10241994	MSRA	5.248e-19	6	AF131215.2(Nerve_Tibial,2.47E-12);AF131215.9(Esophagus_Mucosa,2.91E-12);AF131215.9(Nerve_Tibial,1.25E-11);AF131215.9(Thyroid,6.39E-11);AF131215.2(Thyroid,2.97E-09);AF131215.2(Esophagus_Mucosa,4.54E-09);AF131215.2(Esophagus_Gastroesophageal_Junction,5.89E-09);AF131215.9(Lung,6.24E-09);AF131215.2(Skin_Sun_Exposed_Lower_leg,4.14E-08);AF131215.9(Pancreas,5.43E-08);AF131215.2(Lung,9.79E-08)	AF131215.2,rs34919878,2.47E-12	AF131215.2,rs36089015,3.07E-31,Skin_Sun_Exposed_Lower_leg	r2(rs34919878,rs36089015)=0.142	AF131215.9,rs34919878,2.91E-12	AF131215.9,rs11778398,2.26E-30,Lung	r2(rs34919878,rs11778398)=0.107										8	10241994	rs34919878	G	A	0.05	0.3	0	0.43							6 altered motifs			8 hits	MSRA	MSRA	intronic
186	rs34487797	10099602	MSRA	8	10242092	MSRA	1.479e-18	6	AF131215.9(Esophagus_Mucosa,4.21E-13);AF131215.2(Nerve_Tibial,2.10E-12);AF131215.9(Nerve_Tibial,1.17E-11);AF131215.9(Thyroid,2.20E-11);AF131215.2(Thyroid,1.87E-09);AF131215.9(Lung,3.00E-09);AF131215.2(Esophagus_Mucosa,4.28E-09);AF131215.2(Skin_Sun_Exposed_Lower_leg,6.61E-09);AF131215.2(Esophagus_Gastroesophageal_Junction,9.89E-09);AF131215.2(Lung,6.67E-08);AF131215.9(Heart_Atrial_Appendage,6.86E-…	AF131215.9,rs34487797,4.21E-13	AF131215.9,rs11778398,2.26E-30,Lung	r2(rs34487797,rs11778398)=0.111	AF131215.2,rs34487797,2.10E-12	AF131215.2,rs36089015,3.07E-31,Skin_Sun_Exposed_Lower_leg	r2(rs34487797,rs36089015)=0.147										8	10242092	rs34487797	C	T	0.05	0.3	0	0.43							4 altered motifs			9 hits	MSRA	MSRA	intronic
187	rs55836143	10100070	MSRA	8	10242560	MSRA	1.072e-17	6	AF131215.9(Esophagus_Mucosa,1.01E-12);AF131215.2(Nerve_Tibial,2.99E-12);AF131215.9(Nerve_Tibial,8.72E-12);AF131215.9(Thyroid,1.80E-11);AF131215.2(Esophagus_Gastroesophageal_Junction,1.20E-09);AF131215.2(Thyroid,3.01E-09);AF131215.2(Skin_Sun_Exposed_Lower_leg,7.11E-09);AF131215.2(Testis,1.50E-08);AF131215.9(Heart_Atrial_Appendage,1.55E-08);AF131215.9(Lung,3.96E-08);AF131215.2(Esophagus_Mucosa,4.48…	AF131215.9,rs55836143,1.01E-12	AF131215.9,rs11778398,2.26E-30,Lung	r2(rs55836143,rs11778398)=0.113	AF131215.2,rs55836143,2.99E-12	AF131215.2,rs36089015,3.07E-31,Skin_Sun_Exposed_Lower_leg	r2(rs55836143,rs36089015)=0.138										8	10242560	rs55836143	G	T	0.1	0.31	0.03	0.44							8 altered motifs			11 hits	MSRA	MSRA	intronic
188	rs2272597	10100524	MSRA	8	10243014	MSRA	2.63e-17	5	AF131215.9(Esophagus_Mucosa,2.32E-12);AF131215.2(Nerve_Tibial,4.28E-11);AF131215.9(Nerve_Tibial,5.23E-10);AF131215.9(Thyroid,2.89E-09);AF131215.9(Heart_Atrial_Appendage,1.21E-08);AF131215.2(Esophagus_Gastroesophageal_Junction,2.15E-08);AF131215.2(Esophagus_Mucosa,3.97E-08);AF131215.2(Stomach,4.66E-08);AF131215.2(Thyroid,7.02E-08)	AF131215.9,rs2272597,2.32E-12	AF131215.9,rs11778398,2.26E-30,Lung	r2(rs2272597,rs11778398)=0.092	AF131215.2,rs2272597,4.28E-11	AF131215.2,rs36089015,3.07E-31,Skin_Sun_Exposed_Lower_leg	r2(rs2272597,rs36089015)=0.101										8	10243014	rs2272597	A	C	0.35	0.34	0.03	0.47							13 altered motifs			11 hits	MSRA	MSRA	intronic
189	rs2272598	10100769	MSRA	8	10243259	MSRA	5.129e-17	6	AF131215.9(Esophagus_Mucosa,3.21E-12);AF131215.2(Nerve_Tibial,4.67E-11);AF131215.9(Nerve_Tibial,7.80E-11);AF131215.9(Thyroid,2.72E-09);AF131215.2(Esophagus_Gastroesophageal_Junction,1.10E-08);AF131215.2(Thyroid,1.50E-08);AF131215.2(Esophagus_Mucosa,4.17E-08);AF131215.2(Stomach,4.26E-08);AF131215.9(Heart_Atrial_Appendage,7.65E-08);AF131215.9(Stomach,9.02E-08)	AF131215.9,rs2272598,3.21E-12	AF131215.9,rs11778398,2.26E-30,Lung	r2(rs2272598,rs11778398)=0.092	AF131215.2,rs2272598,4.67E-11	AF131215.2,rs36089015,3.07E-31,Skin_Sun_Exposed_Lower_leg	r2(rs2272598,rs36089015)=0.104										8	10243259	rs2272598	T	C	0.31	0.33	0.03	0.47					KID		RXRA,Rad21			10 hits	MSRA	MSRA	intronic
190	rs17750324	10100912	MSRA	8	10243402	MSRA	2.399e-17	6	AF131215.9(Esophagus_Mucosa,8.80E-13);AF131215.9(Nerve_Tibial,2.34E-10);AF131215.2(Nerve_Tibial,2.41E-10);AF131215.9(Thyroid,5.30E-09);AF131215.2(Esophagus_Mucosa,9.44E-09);AF131215.2(Thyroid,2.07E-08);AF131215.2(Esophagus_Gastroesophageal_Junction,3.93E-08);AF131215.2(Stomach,5.20E-08)	AF131215.9,rs17750324,8.80E-13	AF131215.9,rs11778398,2.26E-30,Lung	r2(rs17750324,rs11778398)=0.085	AF131215.2,rs17750324,2.41E-10	AF131215.2,rs36089015,3.07E-31,Skin_Sun_Exposed_Lower_leg	r2(rs17750324,rs36089015)=0.103										8	10243402	rs17750324	G	A	0.27	0.33	0	0.46							Foxp1,Sox,TCF4			8 hits	MSRA	MSRA	intronic
191	rs2952225	10103179	MSRA	8	10245669	MSRA	2.692e-11	5	AF131215.2(Nerve_Tibial,3.39E-11);AF131215.9(Esophagus_Mucosa,8.10E-10);AF131215.9(Thyroid,4.02E-09);AF131215.9(Nerve_Tibial,7.86E-09);AF131215.9(Lung,8.17E-08);AF131215.2(Thyroid,9.40E-08)	AF131215.2,rs2952225,3.39E-11	AF131215.2,rs36089015,3.07E-31,Skin_Sun_Exposed_Lower_leg	r2(rs2952225,rs36089015)=0.058	AF131215.9,rs2952225,8.10E-10	AF131215.9,rs11778398,2.26E-30,Lung	r2(rs2952225,rs11778398)=0.048										8	10245669	rs2952225	G	C	0.37	0.39	0.17	0.53							10 altered motifs			5 hits	MSRA	MSRA	intronic
192	rs4841294	10105068	MSRA	8	10247558	MSRA	2.57e-17	1f	AF131215.9(Esophagus_Mucosa,5.64E-13);AF131215.2(Nerve_Tibial,3.53E-11);AF131215.9(Nerve_Tibial,7.85E-11);AF131215.9(Thyroid,1.55E-09);AF131215.9(Lung,9.19E-09);AF131215.9(Heart_Atrial_Appendage,9.59E-09);AF131215.2(Esophagus_Mucosa,1.82E-08);AF131215.2(Thyroid,4.35E-08);AF131215.9(Skin_Not_Sun_Exposed_Suprapubic,7.35E-08)	AF131215.9,rs4841294,5.64E-13	AF131215.9,rs11778398,2.26E-30,Lung	r2(rs4841294,rs11778398)=0.091	AF131215.2,rs4841294,3.53E-11	AF131215.2,rs36089015,3.07E-31,Skin_Sun_Exposed_Lower_leg	r2(rs4841294,rs36089015)=0.111										8	10247558	rs4841294	C	A	0.23	0.32	0	0.45				BRN, VAS	BRN		4 altered motifs		2 hits	10 hits	MSRA	MSRA	intronic
193	rs4841295	10105115	MSRA	8	10247605	MSRA	3.981e-16	1f	AF131215.9(Esophagus_Mucosa,5.75E-14);AF131215.2(Nerve_Tibial,1.63E-11);AF131215.9(Nerve_Tibial,2.98E-11);AF131215.9(Thyroid,7.30E-10);AF131215.9(Lung,6.01E-09);AF131215.2(Esophagus_Mucosa,7.03E-09);AF131215.9(Heart_Atrial_Appendage,1.25E-08);AF131215.2(Thyroid,3.77E-08)	AF131215.9,rs4841295,5.75E-14	AF131215.9,rs11778398,2.26E-30,Lung	r2(rs4841295,rs11778398)=0.1	AF131215.2,rs4841295,1.63E-11	AF131215.2,rs36089015,3.07E-31,Skin_Sun_Exposed_Lower_leg	r2(rs4841295,rs36089015)=0.122										8	10247605	rs4841295	T	C	0.21	0.32	0	0.46				BRN, VAS	BRN,GI		Irf		1 hit	8 hits	MSRA	MSRA	intronic
194	rs17693945	10106010	MSRA	8	10248500	MSRA	1.514e-18	5	AF131215.9(Esophagus_Mucosa,5.84E-14);AF131215.2(Nerve_Tibial,1.20E-12);AF131215.9(Nerve_Tibial,1.30E-11);AF131215.9(Thyroid,4.85E-11);AF131215.9(Lung,4.56E-10);AF131215.2(Esophagus_Mucosa,1.10E-09);AF131215.2(Thyroid,4.86E-09);AF131215.2(Skin_Sun_Exposed_Lower_leg,7.20E-09);AF131215.2(Lung,1.02E-08);AF131215.2(Esophagus_Gastroesophageal_Junction,4.89E-08);AF131215.9(Heart_Atrial_Appendage,4.92E-…	AF131215.9,rs17693945,5.84E-14	AF131215.9,rs11778398,2.26E-30,Lung	r2(rs17693945,rs11778398)=0.103	AF131215.2,rs17693945,1.20E-12	AF131215.2,rs36089015,3.07E-31,Skin_Sun_Exposed_Lower_leg	r2(rs17693945,rs36089015)=0.13	RP11-115J16.2,rs17693945,9.64E-08	RP11-115J16.2,rs898797,5.12E-24,Testis	r2(rs17693945,rs898797)=0.097							8	10248500	rs17693945	C	T	0.14	0.31	0	0.44				BRN, GI	6 tissues					10 hits	MSRA	MSRA	intronic
195	rs17694485	10114458	MSRA	8	10256948	MSRA	1e-17	6	AF131215.9(Esophagus_Mucosa,2.40E-14);AF131215.2(Nerve_Tibial,1.63E-12);AF131215.9(Nerve_Tibial,8.73E-12);AF131215.9(Thyroid,1.54E-11);AF131215.2(Esophagus_Mucosa,1.42E-10);AF131215.9(Lung,2.03E-10);AF131215.2(Skin_Sun_Exposed_Lower_leg,6.06E-10);AF131215.2(Thyroid,1.62E-09);AF131215.9(Heart_Atrial_Appendage,3.73E-09);AF131215.2(Lung,5.15E-09);AF131215.2(Esophagus_Gastroesophageal_Junction,1.07E-…	AF131215.9,rs17694485,2.40E-14	AF131215.9,rs11778398,2.26E-30,Lung	r2(rs17694485,rs11778398)=0.117	AF131215.2,rs17694485,1.63E-12	AF131215.2,rs36089015,3.07E-31,Skin_Sun_Exposed_Lower_leg	r2(rs17694485,rs36089015)=0.155										8	10256948	rs17694485	T	A	0.03	0.3	0	0.43							9 altered motifs		2 hits	9 hits	MSRA	MSRA	intronic
196	rs13258409	10115002	MSRA	8	10257492	MSRA	9.55e-19	6	AF131215.9(Esophagus_Mucosa,5.94E-14);AF131215.2(Nerve_Tibial,5.12E-12);AF131215.9(Nerve_Tibial,5.80E-12);AF131215.9(Thyroid,1.85E-11);AF131215.2(Esophagus_Mucosa,1.57E-10);AF131215.9(Lung,1.79E-10);AF131215.2(Thyroid,2.81E-09);AF131215.2(Lung,5.65E-09);AF131215.2(Esophagus_Gastroesophageal_Junction,1.52E-08);AF131215.2(Skin_Sun_Exposed_Lower_leg,1.67E-08);AF131215.9(Heart_Atrial_Appendage,3.19E-…	AF131215.9,rs13258409,5.94E-14	AF131215.9,rs11778398,2.26E-30,Lung	r2(rs13258409,rs11778398)=0.106	AF131215.2,rs13258409,5.12E-12	AF131215.2,rs36089015,3.07E-31,Skin_Sun_Exposed_Lower_leg	r2(rs13258409,rs36089015)=0.137										8	10257492	rs13258409	C	T	0.07	0.31	0	0.42							17 altered motifs			10 hits	MSRA	MSRA	intronic
197	rs17751178	10116730	MSRA	8	10259220	MSRA	2.63e-18	6	AF131215.9(Esophagus_Mucosa,1.22E-13);AF131215.9(Nerve_Tibial,3.30E-12);AF131215.9(Thyroid,6.16E-12);AF131215.2(Nerve_Tibial,1.22E-11);AF131215.9(Lung,8.24E-10);AF131215.2(Esophagus_Mucosa,3.27E-09);AF131215.2(Thyroid,7.95E-09);AF131215.2(Lung,1.62E-08);AF131215.9(Heart_Atrial_Appendage,1.71E-08);AF131215.2(Esophagus_Gastroesophageal_Junction,2.36E-08);AF131215.2(Skin_Sun_Exposed_Lower_leg,2.53E-…	AF131215.9,rs17751178,1.22E-13	AF131215.9,rs11778398,2.26E-30,Lung	r2(rs17751178,rs11778398)=0.105	AF131215.2,rs17751178,1.22E-11	AF131215.2,rs36089015,3.07E-31,Skin_Sun_Exposed_Lower_leg	r2(rs17751178,rs36089015)=0.133										8	10259220	rs17751178	C	T	0.08	0.31	0	0.44				GI					2 hits	7 hits	MSRA	MSRA	intronic
198	rs11776973	10117411	MSRA	8	10259901	MSRA	1.318e-17	6	AF131215.9(Esophagus_Mucosa,3.61E-14);AF131215.9(Nerve_Tibial,3.72E-12);AF131215.2(Nerve_Tibial,5.70E-12);AF131215.9(Thyroid,7.00E-11);AF131215.9(Lung,1.85E-10);AF131215.2(Esophagus_Mucosa,4.73E-10);AF131215.2(Skin_Sun_Exposed_Lower_leg,2.93E-09);AF131215.2(Lung,8.01E-09);AF131215.2(Thyroid,2.21E-08);AF131215.9(Heart_Atrial_Appendage,3.65E-08);AF131215.2(Testis,4.76E-08);RP11-115J16.2(Testis,7.73…	AF131215.9,rs11776973,3.61E-14	AF131215.9,rs11778398,2.26E-30,Lung	r2(rs11776973,rs11778398)=0.108	AF131215.2,rs11776973,5.70E-12	AF131215.2,rs36089015,3.07E-31,Skin_Sun_Exposed_Lower_leg	r2(rs11776973,rs36089015)=0.14	RP11-115J16.2,rs11776973,7.73E-08	RP11-115J16.2,rs898797,5.12E-24,Testis	r2(rs11776973,rs898797)=0.09							8	10259901	rs11776973	C	T	0.07	0.31	0	0.43				ESDR, GI			4 altered motifs		1 hit	10 hits	MSRA	MSRA	intronic
199	rs6601427	10156025	MSRA	8	10298515	MSRA	2.884e-108	6	AF131215.2(Lung,9.25E-12);AF131215.9(Thyroid,1.19E-11);AF131215.9(Esophagus_Mucosa,1.59E-11);AF131215.9(Lung,3.97E-11);AF131215.2(Skin_Sun_Exposed_Lower_leg,9.33E-11);RP11-115J16.2(Testis,2.03E-10);AF131215.9(Heart_Atrial_Appendage,1.20E-09);AF131215.9(Adipose_Subcutaneous,6.83E-09);AF131215.2(Nerve_Tibial,1.39E-08);AF131215.2(Thyroid,1.78E-08);AF131215.2(Esophagus_Mucosa,4.34E-08);AF131215.9(Ski…	AF131215.2,rs6601427,9.25E-12	AF131215.2,rs36089015,3.07E-31,Skin_Sun_Exposed_Lower_leg	r2(rs6601427,rs36089015)=0.138	AF131215.9,rs6601427,1.19E-11	AF131215.9,rs11778398,2.26E-30,Lung	r2(rs6601427,rs11778398)=0.177	RP11-115J16.2,rs6601427,2.03E-10	RP11-115J16.2,rs898797,5.12E-24,Testis	r2(rs6601427,rs898797)=0.189							8	10298515	rs6601427	T	C	0.61	0.42	0.01	0.57					BLD				3 hits	14 hits	MSRA	MSRA	intronic
200	rs4841317	10186135	MSRA	8	10328625	MSRA	8.318e-176	7	AF131215.9(Thyroid,8.84E-12);AF131215.9(Esophagus_Mucosa,9.09E-12);AF131215.2(Skin_Sun_Exposed_Lower_leg,1.84E-11);AF131215.9(Lung,1.95E-11);AF131215.2(Lung,4.87E-11);RP11-115J16.2(Testis,1.49E-10);AF131215.2(Thyroid,9.56E-10);AF131215.2(Nerve_Tibial,1.44E-09);AF131215.2(Esophagus_Mucosa,5.98E-09);AF131215.2(Skin_Not_Sun_Exposed_Suprapubic,8.15E-09);AF131215.9(Skin_Not_Sun_Exposed_Suprapubic,2.55…	AF131215.9,rs4841317,8.84E-12	AF131215.9,rs11778398,2.26E-30,Lung	r2(rs4841317,rs11778398)=0.159	AF131215.2,rs4841317,1.84E-11	AF131215.2,rs36089015,3.07E-31,Skin_Sun_Exposed_Lower_leg	r2(rs4841317,rs36089015)=0.129	RP11-115J16.2,rs4841317,1.49E-10	RP11-115J16.2,rs898797,5.12E-24,Testis	r2(rs4841317,rs898797)=0.18							8	10328625	rs4841317	C	T	0.34	0.59	0.99	0.43				BLD			Pou2f2			16 hits	MSRA	MSRA	intronic
201	rs7837316	10187992	MSRA	8	10330482	MSRA	1.122e-14	7	AF131215.9(Thyroid,4.23E-10);AF131215.2(Thyroid,1.30E-08);AF131215.9(Esophagus_Mucosa,4.66E-08);AF131215.2(Nerve_Tibial,5.08E-08)	AF131215.9,rs7837316,4.23E-10	AF131215.9,rs11778398,2.26E-30,Lung	r2(rs7837316,rs11778398)=0.045	AF131215.2,rs7837316,1.30E-08	AF131215.2,rs36089015,3.07E-31,Skin_Sun_Exposed_Lower_leg	r2(rs7837316,rs36089015)=0.035										8	10330482	rs7837316	G	A	0.2	0.32	0.39	0.32				BLD, BRN			Zfp410			5 hits	MSRA	MSRA	intronic
202	rs13249929	10188617	MSRA	8	10331107	MSRA	7.943e-14	6	AF131215.9(Thyroid,9.48E-10);AF131215.2(Skin_Sun_Exposed_Lower_leg,3.43E-08);AF131215.9(Esophagus_Mucosa,4.19E-08);AF131215.2(Thyroid,4.60E-08);AF131215.2(Nerve_Tibial,6.12E-08)	AF131215.9,rs13249929,9.48E-10	AF131215.9,rs11778398,2.26E-30,Lung	r2(rs13249929,rs11778398)=0.047	AF131215.2,rs13249929,3.43E-08	AF131215.2,rs36089015,3.07E-31,Skin_Sun_Exposed_Lower_leg	r2(rs13249929,rs36089015)=0.034										8	10331107	rs13249929	G	A	0.16	0.32	0.39	0.32				5 tissues	4 tissues				2 hits	10 hits	MSRA	MSRA	intronic
203	rs7832708	10190040	MSRA	8	10332530	MSRA	6.918e-27	1f	AF131215.2(Skin_Sun_Exposed_Lower_leg,3.71E-15);AF131215.9(Esophagus_Mucosa,4.60E-14);AF131215.9(Thyroid,4.89E-13);AF131215.2(Esophagus_Mucosa,1.74E-10);AF131215.9(Skin_Sun_Exposed_Lower_leg,2.06E-10);AF131215.2(Lung,3.03E-10);AF131215.2(Thyroid,3.08E-10);AF131215.2(Nerve_Tibial,3.32E-10);AF131215.2(Heart_Atrial_Appendage,6.40E-10);AF131215.9(Lung,9.69E-10);AF131215.2(Skin_Not_Sun_Exposed_Suprapu…	AF131215.2,rs7832708,3.71E-15	AF131215.2,rs36089015,3.07E-31,Skin_Sun_Exposed_Lower_leg	r2(rs7832708,rs36089015)=0.127	AF131215.9,rs7832708,4.60E-14	AF131215.9,rs11778398,2.26E-30,Lung	r2(rs7832708,rs11778398)=0.156	RP11-115J16.2,rs7832708,5.76E-09	RP11-115J16.2,rs898797,5.12E-24,Testis	r2(rs7832708,rs898797)=0.188							8	10332530	rs7832708	C	T	0.33	0.59	0.99	0.46			BLD, SKIN	8 tissues	BLD		Hoxa3		12 hits	18 hits	MSRA	MSRA	intronic
204	rs35130171	10190735	MSRA	8	10333225	MSRA	6.026e-15	5	AF131215.9(Thyroid,4.91E-10);AF131215.2(Skin_Sun_Exposed_Lower_leg,3.21E-09);AF131215.2(Lung,4.33E-09);AF131215.9(Lung,1.07E-08);AF131215.2(Thyroid,1.77E-08);AF131215.9(Esophagus_Mucosa,2.46E-08);AF131215.2(Nerve_Tibial,8.59E-08)	AF131215.9,rs35130171,4.91E-10	AF131215.9,rs11778398,2.26E-30,Lung	r2(rs35130171,rs11778398)=0.05	AF131215.2,rs35130171,3.21E-09	AF131215.2,rs36089015,3.07E-31,Skin_Sun_Exposed_Lower_leg	r2(rs35130171,rs36089015)=0.037										8	10333225	rs35130171	A	G	0.19	0.33	0.43	0.34			4 tissues	18 tissues	9 tissues		Foxo,Nkx2,Rad21			9 hits	MSRA	MSRA	intronic
205	rs6982308	10193772	MSRA	8	10336262	MSRA	7.244e-24	6	AF131215.2(Skin_Sun_Exposed_Lower_leg,4.61E-15);AF131215.9(Thyroid,3.18E-14);AF131215.9(Esophagus_Mucosa,4.10E-14);AF131215.2(Thyroid,2.11E-11);AF131215.2(Nerve_Tibial,2.42E-11);AF131215.2(Esophagus_Mucosa,6.18E-11);AF131215.2(Lung,1.88E-10);AF131215.9(Lung,2.26E-10);AF131215.9(Heart_Atrial_Appendage,2.79E-10);AF131215.2(Testis,3.72E-10);AF131215.2(Heart_Atrial_Appendage,4.31E-10);AF131215.9(Nerv…	AF131215.2,rs6982308,4.61E-15	AF131215.2,rs36089015,3.07E-31,Skin_Sun_Exposed_Lower_leg	r2(rs6982308,rs36089015)=0.138	AF131215.9,rs6982308,3.18E-14	AF131215.9,rs11778398,2.26E-30,Lung	r2(rs6982308,rs11778398)=0.16	RP11-115J16.2,rs6982308,1.49E-08	RP11-115J16.2,rs898797,5.12E-24,Testis	r2(rs6982308,rs898797)=0.163							8	10336262	rs6982308	C	G	0.45	0.4	0.04	0.55			IPSC	5 tissues	BRN		HMG-IY,RBP-Jkappa			24 hits	MSRA	MSRA	intronic
206	rs11249992	10220412	MSRA	8	10362902	MSRA	1.514e-18	5	AF131215.2(Skin_Sun_Exposed_Lower_leg,2.81E-10);AF131215.9(Esophagus_Mucosa,7.83E-10)	AF131215.2,rs11249992,2.81E-10	AF131215.2,rs36089015,3.07E-31,Skin_Sun_Exposed_Lower_leg	r2(rs11249992,rs36089015)=0.007	AF131215.9,rs11249992,7.83E-10	AF131215.9,rs11778398,2.26E-30,Lung	r2(rs11249992,rs11778398)=0.008										8	10362902	rs11249992	C	A	0.11	0.35	0.22	0.34				16 tissues	BLD,LNG,SKIN		9 altered motifs			10 hits	MSRA	MSRA	intronic
207	rs3088186	10226355	MSRA	8	10368845	MSRA	2.042e-16	5	AF131215.9(Esophagus_Mucosa,1.13E-09);AF131215.2(Skin_Sun_Exposed_Lower_leg,2.30E-08)	AF131215.9,rs3088186,1.13E-09	AF131215.9,rs11778398,2.26E-30,Lung	r2(rs3088186,rs11778398)=0.017	AF131215.2,rs3088186,2.30E-08	AF131215.2,rs36089015,3.07E-31,Skin_Sun_Exposed_Lower_leg	r2(rs3088186,rs36089015)=0.018										8	10368845	rs3088186	C	T	0.15	0.29	0.23	0.28				7 tissues	5 tissues		5 altered motifs		1 hit	7 hits	MSRA	MSRA	intronic
208	rs11249995	10238922	MSRA	8	10381412	MSRA	3.631e-19	6	AF131215.9(Esophagus_Mucosa,1.45E-14);AF131215.2(Skin_Sun_Exposed_Lower_leg,1.04E-12);AF131215.2(Esophagus_Mucosa,1.78E-10);AF131215.9(Pancreas,2.64E-10);AF131215.9(Thyroid,1.32E-09);AF131215.2(Nerve_Tibial,2.57E-09);AF131215.9(Nerve_Tibial,5.26E-09);AF131215.2(Skin_Not_Sun_Exposed_Suprapubic,7.52E-09);AF131215.9(Skin_Sun_Exposed_Lower_leg,8.40E-09);AF131215.2(Heart_Atrial_Appendage,1.91E-08);AF1…	AF131215.9,rs11249995,1.45E-14	AF131215.9,rs11778398,2.26E-30,Lung	r2(rs11249995,rs11778398)=0.018	AF131215.2,rs11249995,1.04E-12	AF131215.2,rs36089015,3.07E-31,Skin_Sun_Exposed_Lower_leg	r2(rs11249995,rs36089015)=0.018										8	10381412	rs11249995	T	C	0.09	0.32	0.26	0.33							5 altered motifs		1 hit	15 hits	MSRA	MSRA	intronic
209	rs35840352	10239807	MSRA	8	10382297	MSRA	1.413e-19	5	AF131215.9(Esophagus_Mucosa,5.80E-14);AF131215.2(Skin_Sun_Exposed_Lower_leg,1.79E-12);AF131215.2(Esophagus_Mucosa,1.35E-11);AF131215.2(Skin_Not_Sun_Exposed_Suprapubic,1.84E-09);AF131215.9(Thyroid,2.80E-09);AF131215.9(Skin_Sun_Exposed_Lower_leg,4.22E-09);AF131215.9(Pancreas,3.66E-08);AF131215.2(Thyroid,6.74E-08);AF131215.9(Nerve_Tibial,8.62E-08)	AF131215.9,rs35840352,5.80E-14	AF131215.9,rs11778398,2.26E-30,Lung	r2(rs35840352,rs11778398)=0.02	AF131215.2,rs35840352,1.79E-12	AF131215.2,rs36089015,3.07E-31,Skin_Sun_Exposed_Lower_leg	r2(rs35840352,rs36089015)=0.018										8	10382297	rs35840352	A	G	0.14	0.33	0.26	0.33				4 tissues			5 altered motifs			15 hits	MSRA	MSRA	intronic
210	rs34381075	10243785	MSRA	8	10386275	MSRA	3.715e-19	5	AF131215.9(Esophagus_Mucosa,1.76E-14);AF131215.2(Skin_Sun_Exposed_Lower_leg,1.20E-11);AF131215.9(Thyroid,3.61E-10);AF131215.2(Esophagus_Mucosa,1.03E-09);AF131215.9(Pancreas,1.75E-08);AF131215.9(Skin_Sun_Exposed_Lower_leg,3.57E-08);AF131215.2(Thyroid,3.80E-08);AF131215.2(Skin_Not_Sun_Exposed_Suprapubic,4.75E-08);AF131215.9(Nerve_Tibial,6.22E-08);AF131215.2(Nerve_Tibial,9.35E-08)	AF131215.9,rs34381075,1.76E-14	AF131215.9,rs11778398,2.26E-30,Lung	r2(rs34381075,rs11778398)=0.019	AF131215.2,rs34381075,1.20E-11	AF131215.2,rs36089015,3.07E-31,Skin_Sun_Exposed_Lower_leg	r2(rs34381075,rs36089015)=0.019										8	10386275	rs34381075	C	G	0.14	0.31	0.23	0.33							Brachyury,TBX5			11 hits	MSRA	MSRA	intronic
211	rs34487437	10243803	MSRA	8	10386293	MSRA	1.479e-18	5	AF131215.9(Esophagus_Mucosa,1.07E-12);AF131215.2(Skin_Sun_Exposed_Lower_leg,7.83E-11);AF131215.9(Thyroid,5.79E-10);AF131215.2(Esophagus_Mucosa,2.81E-09);AF131215.2(Skin_Not_Sun_Exposed_Suprapubic,1.98E-08);AF131215.9(Pancreas,3.56E-08);AF131215.2(Nerve_Tibial,7.34E-08);AF131215.2(Thyroid,7.69E-08);AF131215.9(Skin_Sun_Exposed_Lower_leg,9.12E-08)	AF131215.9,rs34487437,1.07E-12	AF131215.9,rs11778398,2.26E-30,Lung	r2(rs34487437,rs11778398)=0.019	AF131215.2,rs34487437,7.83E-11	AF131215.2,rs36089015,3.07E-31,Skin_Sun_Exposed_Lower_leg	r2(rs34487437,rs36089015)=0.018										8	10386293	rs34487437	G	A	0.14	0.31	0.23	0.33							5 altered motifs			10 hits	MSRA	MSRA	intronic
212	rs35406700	10244593	MSRA	8	10387083	MSRA	1.549e-18	5	AF131215.9(Esophagus_Mucosa,5.61E-13);AF131215.2(Skin_Sun_Exposed_Lower_leg,4.09E-10);AF131215.9(Thyroid,2.84E-09);AF131215.2(Esophagus_Mucosa,2.85E-09);AF131215.2(Thyroid,1.68E-08);AF131215.9(Pancreas,1.98E-08);AF131215.2(Skin_Not_Sun_Exposed_Suprapubic,4.58E-08);AF131215.2(Heart_Atrial_Appendage,9.51E-08)	AF131215.9,rs35406700,5.61E-13	AF131215.9,rs11778398,2.26E-30,Lung	r2(rs35406700,rs11778398)=0.022	AF131215.2,rs35406700,4.09E-10	AF131215.2,rs36089015,3.07E-31,Skin_Sun_Exposed_Lower_leg	r2(rs35406700,rs36089015)=0.022										8	10387083	rs35406700	A	G	0.2	0.32	0.26	0.33				4 tissues	4 tissues		10 altered motifs			10 hits	MSRA	MSRA	intronic
213	rs11249996	10245463	MSRA	8	10387953	MSRA	1.318e-18	6	AF131215.9(Esophagus_Mucosa,4.38E-13);AF131215.2(Skin_Sun_Exposed_Lower_leg,1.97E-11);AF131215.2(Esophagus_Mucosa,1.49E-09);AF131215.9(Thyroid,1.77E-09);AF131215.9(Pancreas,2.00E-08);AF131215.2(Thyroid,3.61E-08);AF131215.2(Skin_Not_Sun_Exposed_Suprapubic,4.90E-08);AF131215.2(Heart_Atrial_Appendage,7.62E-08);AF131215.9(Skin_Sun_Exposed_Lower_leg,7.96E-08)	AF131215.9,rs11249996,4.38E-13	AF131215.9,rs11778398,2.26E-30,Lung	r2(rs11249996,rs11778398)=0.021	AF131215.2,rs11249996,1.97E-11	AF131215.2,rs36089015,3.07E-31,Skin_Sun_Exposed_Lower_leg	r2(rs11249996,rs36089015)=0.021										8	10387953	rs11249996	A	C	0.15	0.31	0.26	0.32				IPSC			KAP1,Mef2,SP1		5 hits	12 hits	MSRA	MSRA	intronic
214	rs35472251	10246669	MSRA	8	10389159	MSRA	3.89e-18	7	AF131215.2(Skin_Sun_Exposed_Lower_leg,3.15E-12);AF131215.9(Esophagus_Mucosa,1.15E-11);AF131215.9(Skin_Sun_Exposed_Lower_leg,3.46E-09);AF131215.2(Esophagus_Mucosa,6.38E-09);AF131215.9(Pancreas,6.77E-09);AF131215.9(Thyroid,6.92E-09);AF131215.2(Heart_Atrial_Appendage,7.30E-09);AF131215.2(Skin_Not_Sun_Exposed_Suprapubic,1.65E-08);AF131215.9(Nerve_Tibial,2.68E-08);AF131215.2(Nerve_Tibial,3.52E-08);AF1…	AF131215.2,rs35472251,3.15E-12	AF131215.2,rs36089015,3.07E-31,Skin_Sun_Exposed_Lower_leg	r2(rs35472251,rs36089015)=0.019	AF131215.9,rs35472251,1.15E-11	AF131215.9,rs11778398,2.26E-30,Lung	r2(rs35472251,rs11778398)=0.022										8	10389159	rs35472251	A	G	0.08	0.31	0.26	0.32				MUS			NRSF,TATA,YY1			12 hits	MSRA	MSRA	intronic
215	rs34155841	10247529	MSRA	8	10390019	MSRA	3.548e-18	5	AF131215.9(Esophagus_Mucosa,4.22E-13);AF131215.2(Skin_Sun_Exposed_Lower_leg,4.05E-11);AF131215.9(Thyroid,3.77E-09);AF131215.2(Esophagus_Mucosa,4.59E-09);AF131215.9(Pancreas,1.31E-08);AF131215.9(Skin_Sun_Exposed_Lower_leg,3.90E-08);AF131215.2(Thyroid,4.80E-08);AF131215.2(Skin_Not_Sun_Exposed_Suprapubic,7.13E-08);AF131215.2(Heart_Atrial_Appendage,8.79E-08)	AF131215.9,rs34155841,4.22E-13	AF131215.9,rs11778398,2.26E-30,Lung	r2(rs34155841,rs11778398)=0.02	AF131215.2,rs34155841,4.05E-11	AF131215.2,rs36089015,3.07E-31,Skin_Sun_Exposed_Lower_leg	r2(rs34155841,rs36089015)=0.02										8	10390019	rs34155841	T	G	0.14	0.31	0.25	0.33				7 tissues			SREBP,STAT			10 hits	MSRA	MSRA	intronic
216	rs11250001	10255901	MSRA	8	10398391	MSRA	1.413e-17	4	AF131215.2(Skin_Sun_Exposed_Lower_leg,3.97E-11);AF131215.9(Esophagus_Mucosa,5.58E-11);AF131215.2(Heart_Atrial_Appendage,2.38E-08);AF131215.9(Thyroid,3.64E-08);AF131215.9(Pancreas,7.22E-08);AF131215.9(Skin_Sun_Exposed_Lower_leg,9.97E-08)	AF131215.2,rs11250001,3.97E-11	AF131215.2,rs36089015,3.07E-31,Skin_Sun_Exposed_Lower_leg	r2(rs11250001,rs36089015)=0.015	AF131215.9,rs11250001,5.58E-11	AF131215.9,rs11778398,2.26E-30,Lung	r2(rs11250001,rs11778398)=0.016										8	10398391	rs11250001	G	A	0.82	0.68	0.78	0.66				6 tissues	8 tissues	CTCF	NF-I,TLX1::NFIC			11 hits	MSRA	MSRA	intronic
217	rs11250002	10257041	MSRA	8	10399531	MSRA	2.138e-18	7	AF131215.9(Esophagus_Mucosa,1.30E-12);AF131215.2(Skin_Sun_Exposed_Lower_leg,3.27E-12);AF131215.9(Thyroid,1.34E-09);AF131215.9(Skin_Sun_Exposed_Lower_leg,8.67E-09);AF131215.2(Esophagus_Mucosa,9.50E-09);AF131215.2(Heart_Atrial_Appendage,1.13E-08);AF131215.9(Pancreas,1.54E-08);AF131215.9(Nerve_Tibial,3.46E-08)	AF131215.9,rs11250002,1.30E-12	AF131215.9,rs11778398,2.26E-30,Lung	r2(rs11250002,rs11778398)=0.019	AF131215.2,rs11250002,3.27E-12	AF131215.2,rs36089015,3.07E-31,Skin_Sun_Exposed_Lower_leg	r2(rs11250002,rs36089015)=0.019										8	10399531	rs11250002	T	G	0.16	0.3	0.23	0.34			MUS	4 tissues			AP-2,TLX1::NFIC			12 hits	MSRA	MSRA	intronic
218	rs12547997	10260837	MSRA	8	10403327	MSRA	4.677e-17	5	AF131215.9(Esophagus_Mucosa,9.78E-12);AF131215.2(Skin_Sun_Exposed_Lower_leg,4.26E-11);AF131215.2(Esophagus_Mucosa,2.85E-08);AF131215.9(Thyroid,4.59E-08);AF131215.2(Heart_Atrial_Appendage,4.61E-08);AF131215.9(Skin_Sun_Exposed_Lower_leg,7.70E-08)	AF131215.9,rs12547997,9.78E-12	AF131215.9,rs11778398,2.26E-30,Lung	r2(rs12547997,rs11778398)=0.017	AF131215.2,rs12547997,4.26E-11	AF131215.2,rs36089015,3.07E-31,Skin_Sun_Exposed_Lower_leg	r2(rs12547997,rs36089015)=0.014										8	10403327	rs12547997	A	G	0.12	0.31	0.28	0.34				BRN, MUS	BRN,BRN,HRT		CIZ		1 hit	11 hits	MSRA	MSRA	intronic
219	rs12548025	10260921	MSRA	8	10403411	MSRA	6.918e-17	7	AF131215.2(Skin_Sun_Exposed_Lower_leg,5.59E-12);AF131215.9(Esophagus_Mucosa,1.62E-11);AF131215.2(Esophagus_Mucosa,4.72E-09);AF131215.2(Heart_Atrial_Appendage,1.19E-08);AF131215.9(Skin_Sun_Exposed_Lower_leg,1.37E-08);AF131215.9(Thyroid,6.52E-08);AF131215.9(Pancreas,9.37E-08)	AF131215.2,rs12548025,5.59E-12	AF131215.2,rs36089015,3.07E-31,Skin_Sun_Exposed_Lower_leg	r2(rs12548025,rs36089015)=0.012	AF131215.9,rs12548025,1.62E-11	AF131215.9,rs11778398,2.26E-30,Lung	r2(rs12548025,rs11778398)=0.015										8	10403411	rs12548025	A	T	0.08	0.31	0.24	0.33				BRN, MUS						13 hits	MSRA	MSRA	intronic
220	rs11786677	10264260	MSRA	8	10406750	MSRA	5.623e-49	2b	AF131215.2(Skin_Sun_Exposed_Lower_leg,9.01E-13);AF131215.9(Esophagus_Mucosa,1.48E-11);AF131215.9(Thyroid,5.00E-11);AF131215.9(Skin_Sun_Exposed_Lower_leg,8.91E-10);AF131215.2(Esophagus_Mucosa,1.37E-09);AF131215.9(Stomach,1.60E-09);AF131215.2(Heart_Atrial_Appendage,3.77E-09);AF131215.2(Pancreas,5.89E-09);AF131215.2(Lung,6.44E-09);AF131215.9(Lung,3.34E-08);AF131215.9(Pancreas,5.37E-08);AF131215.2(Th…	AF131215.2,rs11786677,9.01E-13	AF131215.2,rs36089015,3.07E-31,Skin_Sun_Exposed_Lower_leg	r2(rs11786677,rs36089015)=0.084	AF131215.9,rs11786677,1.48E-11	AF131215.9,rs11778398,2.26E-30,Lung	r2(rs11786677,rs11778398)=0.083										8	10406750	rs11786677	A	G	0.43	0.52	0.75	0.39							5 altered motifs			13 hits	MSRA	MSRA	intronic
221	rs9650651	10267540	MSRA	8	10410030	MSRA	8.128e-18	6	AF131215.2(Skin_Sun_Exposed_Lower_leg,3.01E-13);AF131215.9(Thyroid,1.07E-12);AF131215.9(Esophagus_Mucosa,1.03E-11);AF131215.9(Skin_Sun_Exposed_Lower_leg,9.21E-10);AF131215.2(Heart_Atrial_Appendage,9.90E-10);AF131215.2(Esophagus_Mucosa,1.60E-09);AF131215.2(Lung,6.67E-09);AF131215.9(Pancreas,7.30E-09);AF131215.2(Thyroid,7.99E-09);AF131215.9(Lung,9.18E-09);AF131215.9(Stomach,2.91E-08);AF131215.9(Ner…	AF131215.2,rs9650651,3.01E-13	AF131215.2,rs36089015,3.07E-31,Skin_Sun_Exposed_Lower_leg	r2(rs9650651,rs36089015)=0.091	AF131215.9,rs9650651,1.07E-12	AF131215.9,rs11778398,2.26E-30,Lung	r2(rs9650651,rs11778398)=0.095										8	10410030	rs9650651	C	A	0.6	0.53	0.71	0.37				4 tissues			7 altered motifs			14 hits	MSRA	MSRA	intronic
222	rs7831557	10280228	MSRA	8	10422718	MSRA	3.548e-18	6	AF131215.2(Skin_Sun_Exposed_Lower_leg,6.77E-16);AF131215.9(Thyroid,7.91E-16);AF131215.9(Esophagus_Mucosa,1.34E-14);AF131215.2(Nerve_Tibial,3.35E-14);AF131215.2(Esophagus_Mucosa,9.90E-14);AF131215.9(Nerve_Tibial,6.98E-13);AF131215.9(Skin_Sun_Exposed_Lower_leg,5.45E-12);AF131215.2(Thyroid,8.41E-12);AF131215.2(Heart_Atrial_Appendage,4.76E-10);AF131215.9(Pancreas,4.85E-10);AF131215.9(Stomach,8.16E-10…	AF131215.2,rs7831557,6.77E-16	AF131215.2,rs36089015,3.07E-31,Skin_Sun_Exposed_Lower_leg	r2(rs7831557,rs36089015)=0.175	AF131215.9,rs7831557,7.91E-16	AF131215.9,rs11778398,2.26E-30,Lung	r2(rs7831557,rs11778398)=0.168	RP11-115J16.2,rs7831557,9.24E-09	RP11-115J16.2,rs898797,5.12E-24,Testis	r2(rs7831557,rs898797)=0.111	TDH,rs7831557,1.08E-08	TDH,rs56177149,5.19E-39,Pancreas	r2(rs7831557,rs56177149)=0.082				8	10422718	rs7831557	G	A	0.23	0.37	0.03	0.54							BHLHE40,Tgif1		3 hits	27 hits	MSRA	MSRA	intronic
223	rs3750310	10283426	MSRA	8	10425916	MSRA	2.512e-18	5	AF131215.9(Thyroid,6.91E-17);AF131215.2(Skin_Sun_Exposed_Lower_leg,5.26E-16);AF131215.9(Esophagus_Mucosa,1.43E-14);AF131215.2(Esophagus_Mucosa,5.60E-14);AF131215.2(Nerve_Tibial,3.37E-13);AF131215.9(Nerve_Tibial,1.14E-12);AF131215.9(Skin_Sun_Exposed_Lower_leg,3.72E-12);AF131215.2(Thyroid,4.86E-12);AF131215.2(Skin_Not_Sun_Exposed_Suprapubic,1.56E-11);AF131215.9(Stomach,6.16E-11);AF131215.2(Heart_At…	AF131215.9,rs3750310,6.91E-17	AF131215.9,rs11778398,2.26E-30,Lung	r2(rs3750310,rs11778398)=0.193	AF131215.2,rs3750310,5.26E-16	AF131215.2,rs36089015,3.07E-31,Skin_Sun_Exposed_Lower_leg	r2(rs3750310,rs36089015)=0.186	TDH,rs3750310,1.40E-09	TDH,rs56177149,5.19E-39,Pancreas	r2(rs3750310,rs56177149)=0.087	RP11-115J16.2,rs3750310,8.17E-08	RP11-115J16.2,rs898797,5.12E-24,Testis	r2(rs3750310,rs898797)=0.115				8	10425916	rs3750310	G	A	0.23	0.36	0.03	0.53			BRN, GI	11 tissues	5 tissues		HDAC2,Ik-3,TEF-1			26 hits	MSRA	MSRA	intronic
224	rs3750311	10283602	MSRA	8	10426092	MSRA	3.388e-18	5	AF131215.9(Thyroid,1.93E-16);AF131215.2(Skin_Sun_Exposed_Lower_leg,3.51E-15);AF131215.9(Esophagus_Mucosa,5.43E-15);AF131215.2(Esophagus_Mucosa,2.07E-14);AF131215.2(Nerve_Tibial,2.45E-13);AF131215.9(Nerve_Tibial,7.95E-13);AF131215.2(Thyroid,1.61E-12);AF131215.9(Skin_Sun_Exposed_Lower_leg,8.76E-12);AF131215.9(Stomach,5.50E-11);AF131215.9(Pancreas,6.05E-11);TDH(Thyroid,1.85E-10);AF131215.2(Heart_Atr…	AF131215.9,rs3750311,1.93E-16	AF131215.9,rs11778398,2.26E-30,Lung	r2(rs3750311,rs11778398)=0.2	AF131215.2,rs3750311,3.51E-15	AF131215.2,rs36089015,3.07E-31,Skin_Sun_Exposed_Lower_leg	r2(rs3750311,rs36089015)=0.195	TDH,rs3750311,1.85E-10	TDH,rs56177149,5.19E-39,Pancreas	r2(rs3750311,rs56177149)=0.084							8	10426092	rs3750311	C	A	0.2	0.35	0.03	0.53			GI, BRN, MUS	10 tissues	7 tissues					24 hits	MSRA	MSRA	intronic
225	rs7005363	10283748	MSRA	8	10426238	MSRA	2.884e-17	1f	AF131215.9(Nerve_Tibial,1.87E-12);AF131215.9(Thyroid,7.34E-12);AF131215.2(Nerve_Tibial,9.49E-12);AF131215.9(Esophagus_Mucosa,1.78E-11);AF131215.2(Skin_Sun_Exposed_Lower_leg,2.89E-11);AF131215.2(Esophagus_Mucosa,8.22E-11);TDH(Thyroid,4.87E-10);AF131215.9(Heart_Atrial_Appendage,1.63E-09);AF131215.9(Skin_Sun_Exposed_Lower_leg,4.82E-09);AF131215.2(Skin_Not_Sun_Exposed_Suprapubic,6.52E-09);AF131215.2(…	AF131215.9,rs7005363,1.87E-12	AF131215.9,rs11778398,2.26E-30,Lung	r2(rs7005363,rs11778398)=0.055	AF131215.2,rs7005363,9.49E-12	AF131215.2,rs36089015,3.07E-31,Skin_Sun_Exposed_Lower_leg	r2(rs7005363,rs36089015)=0.052	TDH,rs7005363,4.87E-10	TDH,rs56177149,5.19E-39,Pancreas	r2(rs7005363,rs56177149)=0.025							8	10426238	rs7005363	T	C	0.52	0.43	0.5	0.43			GI, BRN, MUS	10 tissues	11 tissues		Maf,NRSF		4 hits	23 hits	MSRA	MSRA	intronic
226	rs11781592	10511121	RP1L1	8	10653611	RP1L1	1.318e-20	5	AF131215.2(Esophagus_Mucosa,5.51E-14);AF131215.9(Skin_Not_Sun_Exposed_Suprapubic,1.07E-13);AF131215.9(Thyroid,3.61E-13);AF131215.9(Lung,2.43E-12);AF131215.2(Thyroid,3.08E-12);RP11-148O21.6(Cells_Transformed_fibroblasts,1.17E-11);AF131215.9(Esophagus_Mucosa,1.47E-11);AF131215.2(Lung,1.88E-11);RP11-148O21.4(Cells_Transformed_fibroblasts,1.20E-10);AF131215.2(Nerve_Tibial,1.30E-10);RP11-148O21.3(Cell…	AF131215.2,rs11781592,5.51E-14	AF131215.2,rs36089015,3.07E-31,Skin_Sun_Exposed_Lower_leg	r2(rs11781592,rs36089015)=0.164	AF131215.9,rs11781592,1.07E-13	AF131215.9,rs11778398,2.26E-30,Lung	r2(rs11781592,rs11778398)=0.167	RP11-148O21.6,rs11781592,1.17E-11	RP11-148O21.6,rs5889367,5.88E-20,Cells_Transformed_fibroblasts	r2(rs11781592,rs5889367)=0.093	RP11-148O21.4,rs11781592,1.20E-10	RP11-148O21.4,rs5889367,2.72E-18,Cells_Transformed_fibroblasts	r2(rs11781592,rs5889367)=0.093	RP11-148O21.3,rs11781592,2.76E-10	RP11-148O21.3,rs5889367,2.67E-20,Cells_Transformed_fibroblasts	r2(rs11781592,rs5889367)=0.093	8	10653611	rs11781592	G	A	0.35	0.5	0.1	0.57			LNG, CRVX, SKIN	15 tissues	8 tissues		5 altered motifs			44 hits	RP1L1	RP1L1	intronic
227	rs28722737	10511419	RP1L1	8	10653909	RP1L1	4.365e-21	2b	AF131215.2(Esophagus_Mucosa,4.29E-14);AF131215.9(Skin_Not_Sun_Exposed_Suprapubic,1.05E-13);AF131215.9(Thyroid,3.85E-13);AF131215.9(Lung,1.44E-12);AF131215.2(Thyroid,2.22E-12);RP11-148O21.6(Cells_Transformed_fibroblasts,3.85E-12);AF131215.9(Esophagus_Mucosa,4.89E-12);AF131215.2(Lung,1.30E-11);RP11-148O21.4(Cells_Transformed_fibroblasts,2.62E-11);AF131215.2(Nerve_Tibial,8.42E-11);RP11-148O21.3(Cell…	AF131215.2,rs28722737,4.29E-14	AF131215.2,rs36089015,3.07E-31,Skin_Sun_Exposed_Lower_leg	r2(rs28722737,rs36089015)=0.165	AF131215.9,rs28722737,1.05E-13	AF131215.9,rs11778398,2.26E-30,Lung	r2(rs28722737,rs11778398)=0.17	RP11-148O21.6,rs28722737,3.85E-12	RP11-148O21.6,rs5889367,5.88E-20,Cells_Transformed_fibroblasts	r2(rs28722737,rs5889367)=0.094	RP11-148O21.4,rs28722737,2.62E-11	RP11-148O21.4,rs5889367,2.72E-18,Cells_Transformed_fibroblasts	r2(rs28722737,rs5889367)=0.094	RP11-148O21.3,rs28722737,8.81E-11	RP11-148O21.3,rs5889367,2.67E-20,Cells_Transformed_fibroblasts	r2(rs28722737,rs5889367)=0.094	8	10653909	rs28722737	C	T	0.34	0.49	0.1	0.56			SKIN, CRVX	11 tissues	6 tissues	AP2GAMMA	7 altered motifs			44 hits	RP1L1	RP1L1	intronic
228	rs28459259	10511707	RP1L1	8	10654197	RP1L1	4.571e-21	5	AF131215.9(Skin_Not_Sun_Exposed_Suprapubic,2.76E-14);AF131215.9(Thyroid,5.66E-14);AF131215.2(Esophagus_Mucosa,4.94E-13);AF131215.9(Lung,7.36E-13);AF131215.2(Thyroid,8.93E-13);RP11-148O21.6(Cells_Transformed_fibroblasts,3.25E-12);AF131215.2(Lung,5.33E-12);AF131215.9(Esophagus_Mucosa,8.48E-12);RP11-148O21.4(Cells_Transformed_fibroblasts,1.18E-11);RP11-148O21.3(Cells_Transformed_fibroblasts,2.99E-11…	AF131215.9,rs28459259,2.76E-14	AF131215.9,rs11778398,2.26E-30,Lung	r2(rs28459259,rs11778398)=0.179	AF131215.2,rs28459259,4.94E-13	AF131215.2,rs36089015,3.07E-31,Skin_Sun_Exposed_Lower_leg	r2(rs28459259,rs36089015)=0.17	RP11-148O21.6,rs28459259,3.25E-12	RP11-148O21.6,rs5889367,5.88E-20,Cells_Transformed_fibroblasts	r2(rs28459259,rs5889367)=0.087	RP11-148O21.4,rs28459259,1.18E-11	RP11-148O21.4,rs5889367,2.72E-18,Cells_Transformed_fibroblasts	r2(rs28459259,rs5889367)=0.087	RP11-148O21.3,rs28459259,2.99E-11	RP11-148O21.3,rs5889367,2.67E-20,Cells_Transformed_fibroblasts	r2(rs28459259,rs5889367)=0.087	8	10654197	rs28459259	C	T	0.31	0.49	0.1	0.56			SKIN, CRVX	11 tissues	5 tissues		10 altered motifs			45 hits	RP1L1	RP1L1	intronic
229	rs9969466	10512511	RP1L1	8	10655001	RP1L1	1.778e-22	4	AF131215.9(Skin_Not_Sun_Exposed_Suprapubic,5.19E-14);AF131215.9(Esophagus_Mucosa,1.75E-13);AF131215.2(Esophagus_Mucosa,3.21E-13);AF131215.9(Thyroid,5.51E-13);RP11-148O21.6(Cells_Transformed_fibroblasts,1.58E-12);AF131215.2(Thyroid,2.85E-12);RP11-148O21.3(Cells_Transformed_fibroblasts,3.76E-12);AF131215.2(Lung,4.06E-12);AF131215.9(Lung,5.62E-12);RP11-148O21.4(Cells_Transformed_fibroblasts,2.39E-11…	AF131215.9,rs9969466,5.19E-14	AF131215.9,rs11778398,2.26E-30,Lung	r2(rs9969466,rs11778398)=0.15	AF131215.2,rs9969466,3.21E-13	AF131215.2,rs36089015,3.07E-31,Skin_Sun_Exposed_Lower_leg	r2(rs9969466,rs36089015)=0.111	RP11-148O21.6,rs9969466,1.58E-12	RP11-148O21.6,rs5889367,5.88E-20,Cells_Transformed_fibroblasts	r2(rs9969466,rs5889367)=0.173	RP11-148O21.3,rs9969466,3.76E-12	RP11-148O21.3,rs5889367,2.67E-20,Cells_Transformed_fibroblasts	r2(rs9969466,rs5889367)=0.173	RP11-148O21.4,rs9969466,2.39E-11	RP11-148O21.4,rs5889367,2.72E-18,Cells_Transformed_fibroblasts	r2(rs9969466,rs5889367)=0.173	8	10655001	rs9969466	G	C	0.76	0.51	0.1	0.56			SKIN, CRVX	15 tissues	10 tissues	AP2ALPHA,AP2GAMMA,ZNF263	Rad21			44 hits	RP1L1	RP1L1	5'-UTR
230	rs9969657	10515278	RP1L1	8	10657768	RP1L1	8.318e-22	6	AF131215.9(Esophagus_Mucosa,2.86E-13);AF131215.9(Thyroid,7.78E-13);AF131215.9(Skin_Not_Sun_Exposed_Suprapubic,8.63E-13);AF131215.2(Thyroid,1.85E-12);RP11-148O21.6(Cells_Transformed_fibroblasts,2.35E-12);RP11-148O21.3(Cells_Transformed_fibroblasts,5.53E-12);AF131215.2(Esophagus_Mucosa,6.25E-12);RP11-148O21.4(Cells_Transformed_fibroblasts,1.67E-11);AF131215.9(Lung,1.17E-10);AF131215.2(Lung,1.49E-10…	AF131215.9,rs9969657,2.86E-13	AF131215.9,rs11778398,2.26E-30,Lung	r2(rs9969657,rs11778398)=0.171	AF131215.2,rs9969657,1.85E-12	AF131215.2,rs36089015,3.07E-31,Skin_Sun_Exposed_Lower_leg	r2(rs9969657,rs36089015)=0.149	RP11-148O21.6,rs9969657,2.35E-12	RP11-148O21.6,rs5889367,5.88E-20,Cells_Transformed_fibroblasts	r2(rs9969657,rs5889367)=0.103	RP11-148O21.3,rs9969657,5.53E-12	RP11-148O21.3,rs5889367,2.67E-20,Cells_Transformed_fibroblasts	r2(rs9969657,rs5889367)=0.103	RP11-148O21.4,rs9969657,1.67E-11	RP11-148O21.4,rs5889367,2.72E-18,Cells_Transformed_fibroblasts	r2(rs9969657,rs5889367)=0.103	8	10657768	rs9969657	G	A	0.5	0.51	0.08	0.56				FAT			4 altered motifs		3 hits	41 hits	RP1L1	2.7kb 5' of RP1L1
231	rs11774552	10515679	RP1L1	8	10658169	RP1L1	1.175e-33	7	AF131215.9(Esophagus_Mucosa,2.86E-13);AF131215.9(Thyroid,7.78E-13);AF131215.9(Skin_Not_Sun_Exposed_Suprapubic,8.63E-13);AF131215.2(Thyroid,1.85E-12);RP11-148O21.6(Cells_Transformed_fibroblasts,2.35E-12);RP11-148O21.3(Cells_Transformed_fibroblasts,5.53E-12);AF131215.2(Esophagus_Mucosa,6.25E-12);RP11-148O21.4(Cells_Transformed_fibroblasts,1.67E-11);AF131215.9(Lung,1.17E-10);AF131215.2(Lung,1.49E-10…	AF131215.9,rs11774552,2.86E-13	AF131215.9,rs11778398,2.26E-30,Lung	r2(rs11774552,rs11778398)=0.172	AF131215.2,rs11774552,1.85E-12	AF131215.2,rs36089015,3.07E-31,Skin_Sun_Exposed_Lower_leg	r2(rs11774552,rs36089015)=0.149	RP11-148O21.6,rs11774552,2.35E-12	RP11-148O21.6,rs5889367,5.88E-20,Cells_Transformed_fibroblasts	r2(rs11774552,rs5889367)=0.104	RP11-148O21.3,rs11774552,5.53E-12	RP11-148O21.3,rs5889367,2.67E-20,Cells_Transformed_fibroblasts	r2(rs11774552,rs5889367)=0.104	RP11-148O21.4,rs11774552,1.67E-11	RP11-148O21.4,rs5889367,2.72E-18,Cells_Transformed_fibroblasts	r2(rs11774552,rs5889367)=0.104	8	10658169	rs11774552	C	T	0.5	0.51	0.08	0.56							STAT,Znf143			41 hits	RP1L1	3.1kb 5' of RP1L1
232	rs4841407	10516185	RP1L1	8	10658675	RP1L1	1.175e-33	5	AF131215.9(Esophagus_Mucosa,2.86E-13);AF131215.9(Thyroid,7.78E-13);AF131215.9(Skin_Not_Sun_Exposed_Suprapubic,8.63E-13);AF131215.2(Thyroid,1.85E-12);RP11-148O21.6(Cells_Transformed_fibroblasts,2.35E-12);RP11-148O21.3(Cells_Transformed_fibroblasts,5.53E-12);AF131215.2(Esophagus_Mucosa,6.25E-12);RP11-148O21.4(Cells_Transformed_fibroblasts,1.67E-11);AF131215.9(Lung,1.17E-10);AF131215.2(Lung,1.49E-10…	AF131215.9,rs4841407,2.86E-13	AF131215.9,rs11778398,2.26E-30,Lung	r2(rs4841407,rs11778398)=0.174	AF131215.2,rs4841407,1.85E-12	AF131215.2,rs36089015,3.07E-31,Skin_Sun_Exposed_Lower_leg	r2(rs4841407,rs36089015)=0.152	RP11-148O21.6,rs4841407,2.35E-12	RP11-148O21.6,rs5889367,5.88E-20,Cells_Transformed_fibroblasts	r2(rs4841407,rs5889367)=0.104	RP11-148O21.3,rs4841407,5.53E-12	RP11-148O21.3,rs5889367,2.67E-20,Cells_Transformed_fibroblasts	r2(rs4841407,rs5889367)=0.104	RP11-148O21.4,rs4841407,1.67E-11	RP11-148O21.4,rs5889367,2.72E-18,Cells_Transformed_fibroblasts	r2(rs4841407,rs5889367)=0.104	8	10658675	rs4841407	G	A	0.5	0.51	0.08	0.56					BLD		4 altered motifs			43 hits	RP1L1	3.6kb 5' of RP1L1
233	rs4841408	10516336	RP1L1	8	10658826	RP1L1	6.31e-22	5	AF131215.9(Thyroid,2.62E-13);AF131215.9(Esophagus_Mucosa,2.73E-13);AF131215.9(Skin_Not_Sun_Exposed_Suprapubic,4.49E-13);AF131215.2(Thyroid,1.11E-12);RP11-148O21.6(Cells_Transformed_fibroblasts,3.68E-12);RP11-148O21.3(Cells_Transformed_fibroblasts,4.69E-12);AF131215.2(Esophagus_Mucosa,1.22E-11);RP11-148O21.4(Cells_Transformed_fibroblasts,2.46E-11);AF131215.9(Lung,5.81E-11);AF131215.2(Lung,9.80E-11…	AF131215.9,rs4841408,2.62E-13	AF131215.9,rs11778398,2.26E-30,Lung	r2(rs4841408,rs11778398)=0.171	AF131215.2,rs4841408,1.11E-12	AF131215.2,rs36089015,3.07E-31,Skin_Sun_Exposed_Lower_leg	r2(rs4841408,rs36089015)=0.147	RP11-148O21.6,rs4841408,3.68E-12	RP11-148O21.6,rs5889367,5.88E-20,Cells_Transformed_fibroblasts	r2(rs4841408,rs5889367)=0.108	RP11-148O21.3,rs4841408,4.69E-12	RP11-148O21.3,rs5889367,2.67E-20,Cells_Transformed_fibroblasts	r2(rs4841408,rs5889367)=0.108	RP11-148O21.4,rs4841408,2.46E-11	RP11-148O21.4,rs5889367,2.72E-18,Cells_Transformed_fibroblasts	r2(rs4841408,rs5889367)=0.108	8	10658826	rs4841408	A	G	0.51	0.52	0.08	0.56				HRT			CTCF,Myc			43 hits	RP1L1	3.7kb 5' of RP1L1
234	rs4841409	10516374	RP1L1	8	10658864	RP1L1	1.445e-25	1f	AF131215.9(Esophagus_Mucosa,2.87E-15);AF131215.9(Skin_Not_Sun_Exposed_Suprapubic,1.54E-13);AF131215.9(Thyroid,1.23E-12);RP11-148O21.6(Cells_Transformed_fibroblasts,1.28E-12);AF131215.2(Esophagus_Mucosa,4.79E-12);AF131215.2(Thyroid,4.80E-12);RP11-148O21.3(Cells_Transformed_fibroblasts,1.43E-11);RP11-148O21.4(Cells_Transformed_fibroblasts,2.43E-11);AF131215.2(Lung,6.00E-11);AF131215.2(Skin_Sun_Expo…	AF131215.9,rs4841409,2.87E-15	AF131215.9,rs11778398,2.26E-30,Lung	r2(rs4841409,rs11778398)=0.143	RP11-148O21.6,rs4841409,1.28E-12	RP11-148O21.6,rs5889367,5.88E-20,Cells_Transformed_fibroblasts	r2(rs4841409,rs5889367)=0.197	AF131215.2,rs4841409,4.79E-12	AF131215.2,rs36089015,3.07E-31,Skin_Sun_Exposed_Lower_leg	r2(rs4841409,rs36089015)=0.1	RP11-148O21.3,rs4841409,1.43E-11	RP11-148O21.3,rs5889367,2.67E-20,Cells_Transformed_fibroblasts	r2(rs4841409,rs5889367)=0.197	RP11-148O21.4,rs4841409,2.43E-11	RP11-148O21.4,rs5889367,2.72E-18,Cells_Transformed_fibroblasts	r2(rs4841409,rs5889367)=0.197	8	10658864	rs4841409	A	G	0.87	0.54	0.1	0.56				HRT			Ets		3 hits	45 hits	RP1L1	3.8kb 5' of RP1L1
235	rs56057779	10516880	RP1L1	8	10659370	RP1L1	8.511e-26	5	AF131215.9(Esophagus_Mucosa,4.22E-13);AF131215.9(Skin_Not_Sun_Exposed_Suprapubic,1.27E-12);AF131215.9(Thyroid,2.35E-12);AF131215.2(Esophagus_Mucosa,2.42E-12);AF131215.2(Thyroid,5.60E-12);RP11-148O21.6(Cells_Transformed_fibroblasts,8.10E-12);RP11-148O21.3(Cells_Transformed_fibroblasts,1.71E-11);RP11-148O21.4(Cells_Transformed_fibroblasts,5.72E-11);AF131215.9(Lung,8.64E-11);AF131215.2(Lung,3.00E-10…	AF131215.9,rs56057779,4.22E-13	AF131215.9,rs11778398,2.26E-30,Lung	r2(rs56057779,rs11778398)=0.173	AF131215.2,rs56057779,2.42E-12	AF131215.2,rs36089015,3.07E-31,Skin_Sun_Exposed_Lower_leg	r2(rs56057779,rs36089015)=0.148	RP11-148O21.6,rs56057779,8.10E-12	RP11-148O21.6,rs5889367,5.88E-20,Cells_Transformed_fibroblasts	r2(rs56057779,rs5889367)=0.096	RP11-148O21.3,rs56057779,1.71E-11	RP11-148O21.3,rs5889367,2.67E-20,Cells_Transformed_fibroblasts	r2(rs56057779,rs5889367)=0.096	RP11-148O21.4,rs56057779,5.72E-11	RP11-148O21.4,rs5889367,2.72E-18,Cells_Transformed_fibroblasts	r2(rs56057779,rs5889367)=0.096	8	10659370	rs56057779	G	C	0.46	0.51	0.08	0.56				FAT, HRT			ERalpha-a			34 hits	RP1L1	4.3kb 5' of RP1L1
236	rs10096777	10518500	RP1L1	8	10660990	RP1L1	2.63e-22	3a	AF131215.9(Esophagus_Mucosa,1.44E-16);AF131215.9(Skin_Not_Sun_Exposed_Suprapubic,4.44E-13);AF131215.2(Esophagus_Mucosa,5.86E-13);RP11-148O21.6(Cells_Transformed_fibroblasts,5.28E-12);AF131215.2(Thyroid,6.59E-12);AF131215.9(Thyroid,1.17E-11);AF131215.2(Lung,3.53E-11);RP11-148O21.3(Cells_Transformed_fibroblasts,4.30E-11);RP11-148O21.4(Cells_Transformed_fibroblasts,9.10E-11);AF131215.9(Pancreas,1.69…	AF131215.9,rs10096777,1.44E-16	AF131215.9,rs11778398,2.26E-30,Lung	r2(rs10096777,rs11778398)=0.144	AF131215.2,rs10096777,5.86E-13	AF131215.2,rs36089015,3.07E-31,Skin_Sun_Exposed_Lower_leg	r2(rs10096777,rs36089015)=0.1	RP11-148O21.6,rs10096777,5.28E-12	RP11-148O21.6,rs5889367,5.88E-20,Cells_Transformed_fibroblasts	r2(rs10096777,rs5889367)=0.202	RP11-148O21.3,rs10096777,4.30E-11	RP11-148O21.3,rs5889367,2.67E-20,Cells_Transformed_fibroblasts	r2(rs10096777,rs5889367)=0.202	RP11-148O21.4,rs10096777,9.10E-11	RP11-148O21.4,rs5889367,2.72E-18,Cells_Transformed_fibroblasts	r2(rs10096777,rs5889367)=0.202	8	10660990	rs10096777	G	A	0.89	0.53	0.1	0.56					MUS,BLD	CTCF	Foxm1,ZID			42 hits	RP1L1	5.9kb 5' of RP1L1
237	rs7814795	10519285	MIR4286	8	10661775	MIR4286	4.677e-39	4	AF131215.9(Esophagus_Mucosa,7.65E-14);AF131215.9(Skin_Not_Sun_Exposed_Suprapubic,1.37E-12);AF131215.9(Thyroid,2.79E-12);AF131215.2(Thyroid,4.59E-11);AF131215.2(Lung,1.00E-10);AF131215.2(Esophagus_Mucosa,1.08E-10);RP11-148O21.6(Cells_Transformed_fibroblasts,3.52E-10);AF131215.2(Nerve_Tibial,4.16E-10);RP11-148O21.3(Cells_Transformed_fibroblasts,1.17E-09);AF131215.9(Lung,1.25E-09);AF131215.2(Skin_Su…	AF131215.9,rs7814795,7.65E-14	AF131215.9,rs11778398,2.26E-30,Lung	r2(rs7814795,rs11778398)=0.157	AF131215.2,rs7814795,4.59E-11	AF131215.2,rs36089015,3.07E-31,Skin_Sun_Exposed_Lower_leg	r2(rs7814795,rs36089015)=0.119	RP11-148O21.6,rs7814795,3.52E-10	RP11-148O21.6,rs5889367,5.88E-20,Cells_Transformed_fibroblasts	r2(rs7814795,rs5889367)=0.149	RP11-148O21.3,rs7814795,1.17E-09	RP11-148O21.3,rs5889367,2.67E-20,Cells_Transformed_fibroblasts	r2(rs7814795,rs5889367)=0.149	RP11-148O21.4,rs7814795,1.60E-08	RP11-148O21.4,rs5889367,2.72E-18,Cells_Transformed_fibroblasts	r2(rs7814795,rs5889367)=0.149	8	10661775	rs7814795	C	T	0.68	0.52	0.1	0.55				5 tissues		CJUN	4 altered motifs			39 hits	RP1L1	6.7kb 5' of RP1L1
238	rs28680211	10519445	MIR4286	8	10661935	MIR4286	9.772e-22	5	AF131215.9(Esophagus_Mucosa,1.32E-13);AF131215.9(Thyroid,3.57E-13);RP11-148O21.6(Cells_Transformed_fibroblasts,3.73E-12);AF131215.9(Skin_Not_Sun_Exposed_Suprapubic,4.31E-12);AF131215.2(Thyroid,7.48E-12);AF131215.2(Esophagus_Mucosa,1.21E-11);RP11-148O21.3(Cells_Transformed_fibroblasts,2.05E-11);AF131215.2(Lung,4.27E-11);AF131215.9(Lung,1.89E-10);RP11-148O21.4(Cells_Transformed_fibroblasts,2.08E-10…	AF131215.9,rs28680211,1.32E-13	AF131215.9,rs11778398,2.26E-30,Lung	r2(rs28680211,rs11778398)=0.193	RP11-148O21.6,rs28680211,3.73E-12	RP11-148O21.6,rs5889367,5.88E-20,Cells_Transformed_fibroblasts	r2(rs28680211,rs5889367)=0.096	AF131215.2,rs28680211,7.48E-12	AF131215.2,rs36089015,3.07E-31,Skin_Sun_Exposed_Lower_leg	r2(rs28680211,rs36089015)=0.167	RP11-148O21.3,rs28680211,2.05E-11	RP11-148O21.3,rs5889367,2.67E-20,Cells_Transformed_fibroblasts	r2(rs28680211,rs5889367)=0.096	RP11-148O21.4,rs28680211,2.08E-10	RP11-148O21.4,rs5889367,2.72E-18,Cells_Transformed_fibroblasts	r2(rs28680211,rs5889367)=0.096	8	10661935	rs28680211	T	A	0.38	0.51	0.05	0.55				5 tissues			5 altered motifs			36 hits	RP1L1	6.8kb 5' of RP1L1
239	rs4841411	10521890	MIR4286	8	10664380	MIR4286	7.943e-27	7	AF131215.9(Esophagus_Mucosa,3.60E-16);AF131215.9(Skin_Not_Sun_Exposed_Suprapubic,1.44E-13);AF131215.2(Esophagus_Mucosa,1.07E-12);RP11-148O21.6(Cells_Transformed_fibroblasts,2.83E-12);AF131215.2(Thyroid,4.25E-12);RP11-148O21.4(Cells_Transformed_fibroblasts,2.36E-11);AF131215.9(Thyroid,2.96E-11);RP11-148O21.3(Cells_Transformed_fibroblasts,4.29E-11);AF131215.2(Lung,9.59E-11);AF131215.2(Skin_Sun_Expo…	AF131215.9,rs4841411,3.60E-16	AF131215.9,rs11778398,2.26E-30,Lung	r2(rs4841411,rs11778398)=0.132	AF131215.2,rs4841411,1.07E-12	AF131215.2,rs36089015,3.07E-31,Skin_Sun_Exposed_Lower_leg	r2(rs4841411,rs36089015)=0.097	RP11-148O21.6,rs4841411,2.83E-12	RP11-148O21.6,rs5889367,5.88E-20,Cells_Transformed_fibroblasts	r2(rs4841411,rs5889367)=0.196	RP11-148O21.4,rs4841411,2.36E-11	RP11-148O21.4,rs5889367,2.72E-18,Cells_Transformed_fibroblasts	r2(rs4841411,rs5889367)=0.196	RP11-148O21.3,rs4841411,4.29E-11	RP11-148O21.3,rs5889367,2.67E-20,Cells_Transformed_fibroblasts	r2(rs4841411,rs5889367)=0.196	8	10664380	rs4841411	C	G	0.11	0.46	0.9	0.44							LBP-1,RREB-1			42 hits	RP1L1	8.3kb 5' of C8orf74
240	rs4551304	10665069	PINX1	8	10807559	PINX1	1.698e-22	4	AF131215.9(Thyroid,1.39E-13);AF131215.2(Thyroid,3.80E-12);RP1L1(Nerve_Tibial,4.33E-11);RP11-148O21.4(Cells_Transformed_fibroblasts,8.36E-10);AF131215.2(Skin_Sun_Exposed_Lower_leg,1.21E-09);AF131215.9(Skin_Not_Sun_Exposed_Suprapubic,4.51E-09);AF131215.9(Lung,6.21E-09);AF131215.2(Nerve_Tibial,6.45E-09);AF131215.9(Esophagus_Mucosa,7.86E-09);RP11-148O21.6(Cells_Transformed_fibroblasts,1.10E-08);AF131…	AF131215.9,rs4551304,1.39E-13	AF131215.9,rs11778398,2.26E-30,Lung	r2(rs4551304,rs11778398)=0.1	AF131215.2,rs4551304,3.80E-12	AF131215.2,rs36089015,3.07E-31,Skin_Sun_Exposed_Lower_leg	r2(rs4551304,rs36089015)=0.072	RP1L1,rs4551304,4.33E-11	RP1L1,rs11774893,9.47E-20,Esophagus_Mucosa	r2(rs4551304,rs11774893)=0.159	RP11-148O21.4,rs4551304,8.36E-10	RP11-148O21.4,rs5889367,2.72E-18,Cells_Transformed_fibroblasts	r2(rs4551304,rs5889367)=0.106	RP11-148O21.6,rs4551304,1.10E-08	RP11-148O21.6,rs5889367,5.88E-20,Cells_Transformed_fibroblasts	r2(rs4551304,rs5889367)=0.106	8	10807559	rs4551304	A	G	0.86	0.62	0.38	0.61					PANC,BLD	SETDB1	EBF,RBP-Jkappa,SIX5			34 hits	PINX1	PINX1	intronic
241	rs7814757	10675188	PINX1	8	10817678	PINX1	6.918e-23	7	AF131215.9(Thyroid,4.94E-14);AF131215.2(Thyroid,5.06E-13);RP1L1(Nerve_Tibial,1.14E-11);RP11-148O21.4(Cells_Transformed_fibroblasts,3.22E-11);RP11-148O21.6(Cells_Transformed_fibroblasts,3.35E-10);AF131215.2(Skin_Sun_Exposed_Lower_leg,2.34E-09);AF131215.9(Skin_Not_Sun_Exposed_Suprapubic,4.58E-09);RP11-148O21.3(Cells_Transformed_fibroblasts,5.71E-09);AF131215.9(Artery_Tibial,6.80E-09);AF131215.9(Ski…	AF131215.9,rs7814757,4.94E-14	AF131215.9,rs11778398,2.26E-30,Lung	r2(rs7814757,rs11778398)=0.111	AF131215.2,rs7814757,5.06E-13	AF131215.2,rs36089015,3.07E-31,Skin_Sun_Exposed_Lower_leg	r2(rs7814757,rs36089015)=0.08	RP1L1,rs7814757,1.14E-11	RP1L1,rs11774893,9.47E-20,Esophagus_Mucosa	r2(rs7814757,rs11774893)=0.146	RP11-148O21.4,rs7814757,3.22E-11	RP11-148O21.4,rs5889367,2.72E-18,Cells_Transformed_fibroblasts	r2(rs7814757,rs5889367)=0.116	RP11-148O21.6,rs7814757,3.35E-10	RP11-148O21.6,rs5889367,5.88E-20,Cells_Transformed_fibroblasts	r2(rs7814757,rs5889367)=0.116	8	10817678	rs7814757	T	C	0.88	0.62	0.35	0.61							NRSF,Rad21,Zic			35 hits	PINX1	PINX1	intronic
242	rs755856	10736552	XKR6	8	10879042	XKR6	1.288e-15	5	AF131215.9(Esophagus_Mucosa,3.92E-13);AF131215.9(Thyroid,5.70E-11);AF131215.2(Skin_Sun_Exposed_Lower_leg,2.06E-10);AF131215.9(Skin_Sun_Exposed_Lower_leg,2.35E-10);AF131215.2(Nerve_Tibial,5.27E-10);AF131215.2(Thyroid,6.61E-10);AF131215.9(Lung,8.34E-10);AF131215.9(Skin_Not_Sun_Exposed_Suprapubic,1.25E-09);AF131215.2(Stomach,1.31E-09);RP11-148O21.3(Cells_Transformed_fibroblasts,4.82E-09);RP11-148O21…	AF131215.9,rs755856,3.92E-13	AF131215.9,rs11778398,2.26E-30,Lung	r2(rs755856,rs11778398)=0.162	AF131215.2,rs755856,2.06E-10	AF131215.2,rs36089015,3.07E-31,Skin_Sun_Exposed_Lower_leg	r2(rs755856,rs36089015)=0.116	RP11-148O21.3,rs755856,4.82E-09	RP11-148O21.3,rs5889367,2.67E-20,Cells_Transformed_fibroblasts	r2(rs755856,rs5889367)=0.146	RP11-148O21.6,rs755856,7.62E-09	RP11-148O21.6,rs5889367,5.88E-20,Cells_Transformed_fibroblasts	r2(rs755856,rs5889367)=0.146	RP11-148O21.4,rs755856,5.83E-08	RP11-148O21.4,rs5889367,2.72E-18,Cells_Transformed_fibroblasts	r2(rs755856,rs5889367)=0.146	8	10879042	rs755856	C	G	0.77	0.58	0.1	0.64				5 tissues	4 tissues		4 altered motifs			46 hits	17kb 3' of XKR6	17kb 3' of XKR6
243	rs7843666	10742059	XKR6	8	10884549	XKR6	7.413e-17	7	AF131215.9(Esophagus_Mucosa,1.05E-12);AF131215.9(Lung,1.84E-12);AF131215.2(Skin_Sun_Exposed_Lower_leg,3.45E-12);AF131215.9(Thyroid,1.42E-11);AF131215.9(Pancreas,9.47E-11);AF131215.2(Lung,2.75E-10);AF131215.9(Skin_Not_Sun_Exposed_Suprapubic,3.33E-10);AF131215.2(Esophagus_Mucosa,4.29E-10);AF131215.9(Skin_Sun_Exposed_Lower_leg,7.39E-10);AF131215.9(Artery_Tibial,1.60E-09);RP11-148O21.3(Cells_Transfor…	AF131215.9,rs7843666,1.05E-12	AF131215.9,rs11778398,2.26E-30,Lung	r2(rs7843666,rs11778398)=0.21	AF131215.2,rs7843666,3.45E-12	AF131215.2,rs36089015,3.07E-31,Skin_Sun_Exposed_Lower_leg	r2(rs7843666,rs36089015)=0.162	RP11-148O21.3,rs7843666,1.61E-09	RP11-148O21.3,rs5889367,2.67E-20,Cells_Transformed_fibroblasts	r2(rs7843666,rs5889367)=0.193	RP11-148O21.6,rs7843666,5.67E-09	RP11-148O21.6,rs5889367,5.88E-20,Cells_Transformed_fibroblasts	r2(rs7843666,rs5889367)=0.193	RP11-148O21.4,rs7843666,2.89E-08	RP11-148O21.4,rs5889367,2.72E-18,Cells_Transformed_fibroblasts	r2(rs7843666,rs5889367)=0.193	8	10884549	rs7843666	G	A	0.66	0.38	0	0.48							5 altered motifs		2 hits	47 hits	11kb 3' of XKR6	12kb 3' of XKR6
244	rs17778581	10743421	XKR6	8	10885911	XKR6	7.586e-18	6	AF131215.9(Esophagus_Mucosa,7.52E-14);AF131215.9(Lung,1.01E-13);AF131215.2(Skin_Sun_Exposed_Lower_leg,1.31E-13);AF131215.9(Thyroid,5.79E-12);AF131215.9(Pancreas,1.63E-11);AF131215.2(Esophagus_Mucosa,1.66E-11);AF131215.2(Lung,2.39E-11);AF131215.9(Skin_Not_Sun_Exposed_Suprapubic,3.02E-11);AF131215.9(Skin_Sun_Exposed_Lower_leg,3.02E-11);AF131215.9(Artery_Tibial,8.50E-10);RP11-148O21.6(Cells_Transfor…	AF131215.9,rs17778581,7.52E-14	AF131215.9,rs11778398,2.26E-30,Lung	r2(rs17778581,rs11778398)=0.194	AF131215.2,rs17778581,1.31E-13	AF131215.2,rs36089015,3.07E-31,Skin_Sun_Exposed_Lower_leg	r2(rs17778581,rs36089015)=0.136	RP11-148O21.6,rs17778581,8.92E-10	RP11-148O21.6,rs5889367,5.88E-20,Cells_Transformed_fibroblasts	r2(rs17778581,rs5889367)=0.217	RP11-148O21.3,rs17778581,9.68E-10	RP11-148O21.3,rs5889367,2.67E-20,Cells_Transformed_fibroblasts	r2(rs17778581,rs5889367)=0.217	RP11-148O21.4,rs17778581,1.53E-08	RP11-148O21.4,rs5889367,2.72E-18,Cells_Transformed_fibroblasts	r2(rs17778581,rs5889367)=0.217	8	10885911	rs17778581	C	T	0.75	0.38	0.01	0.48				BLD	BRN,BRN		6 altered motifs			49 hits	10kb 3' of XKR6	10kb 3' of XKR6
245	rs10090444	10745469	XKR6	8	10887959	XKR6	2.239e-20	6	AF131215.9(Esophagus_Mucosa,4.44E-17);AF131215.2(Skin_Sun_Exposed_Lower_leg,1.30E-16);AF131215.9(Lung,2.93E-16);AF131215.9(Thyroid,1.44E-15);AF131215.2(Lung,2.46E-14);AF131215.9(Skin_Not_Sun_Exposed_Suprapubic,2.49E-14);AF131215.9(Skin_Sun_Exposed_Lower_leg,5.35E-14);AF131215.2(Thyroid,1.20E-13);AF131215.2(Heart_Atrial_Appendage,4.27E-13);AF131215.2(Nerve_Tibial,7.16E-13);RP11-148O21.4(Cells_Tran…	AF131215.9,rs10090444,4.44E-17	AF131215.9,rs11778398,2.26E-30,Lung	r2(rs10090444,rs11778398)=0.23	AF131215.2,rs10090444,1.30E-16	AF131215.2,rs36089015,3.07E-31,Skin_Sun_Exposed_Lower_leg	r2(rs10090444,rs36089015)=0.169	RP11-148O21.4,rs10090444,8.80E-13	RP11-148O21.4,rs5889367,2.72E-18,Cells_Transformed_fibroblasts	r2(rs10090444,rs5889367)=0.231	RP11-148O21.3,rs10090444,8.99E-13	RP11-148O21.3,rs5889367,2.67E-20,Cells_Transformed_fibroblasts	r2(rs10090444,rs5889367)=0.231	RP11-148O21.6,rs10090444,2.70E-12	RP11-148O21.6,rs5889367,5.88E-20,Cells_Transformed_fibroblasts	r2(rs10090444,rs5889367)=0.231	8	10887959	rs10090444	C	G	0.75	0.41	0.02	0.53									4 hits	64 hits	8.1kb 3' of XKR6	8.2kb 3' of XKR6
246	rs10107145	10758213	XKR6	8	10900703	XKR6	1.047e-20	7	AF131215.9(Esophagus_Mucosa,5.85E-18);AF131215.2(Skin_Sun_Exposed_Lower_leg,2.20E-17);AF131215.9(Lung,3.91E-16);AF131215.9(Skin_Not_Sun_Exposed_Suprapubic,1.71E-15);AF131215.9(Thyroid,5.85E-15);AF131215.9(Skin_Sun_Exposed_Lower_leg,1.49E-14);AF131215.2(Lung,1.79E-14);AF131215.2(Nerve_Tibial,1.83E-13);AF131215.2(Esophagus_Mucosa,2.46E-13);AF131215.9(Pancreas,5.56E-13);RP11-148O21.6(Cells_Transform…	AF131215.9,rs10107145,5.85E-18	AF131215.9,rs11778398,2.26E-30,Lung	r2(rs10107145,rs11778398)=0.218	AF131215.2,rs10107145,2.20E-17	AF131215.2,rs36089015,3.07E-31,Skin_Sun_Exposed_Lower_leg	r2(rs10107145,rs36089015)=0.162	RP11-148O21.6,rs10107145,6.41E-13	RP11-148O21.6,rs5889367,5.88E-20,Cells_Transformed_fibroblasts	r2(rs10107145,rs5889367)=0.224	RP11-148O21.4,rs10107145,8.44E-13	RP11-148O21.4,rs5889367,2.72E-18,Cells_Transformed_fibroblasts	r2(rs10107145,rs5889367)=0.224	RP11-148O21.3,rs10107145,1.20E-12	RP11-148O21.3,rs5889367,2.67E-20,Cells_Transformed_fibroblasts	r2(rs10107145,rs5889367)=0.224	8	10900703	rs10107145	A	G	0.75	0.4	0.02	0.53					IPSC		HNF4			63 hits	XKR6	XKR6	intronic
247	rs13270870	10770782	XKR6	8	10913272	XKR6	1.738e-18	6	AF131215.2(Skin_Sun_Exposed_Lower_leg,5.80E-15);AF131215.9(Esophagus_Mucosa,1.69E-14);AF131215.9(Lung,2.37E-14);AF131215.9(Skin_Not_Sun_Exposed_Suprapubic,2.71E-13);AF131215.9(Thyroid,2.65E-12);AF131215.2(Esophagus_Mucosa,4.10E-12);AF131215.9(Pancreas,6.37E-12);AF131215.9(Skin_Sun_Exposed_Lower_leg,9.64E-12);AF131215.9(Heart_Atrial_Appendage,1.44E-11);AF131215.2(Lung,1.72E-11);RP11-148O21.3(Cells…	AF131215.2,rs13270870,5.80E-15	AF131215.2,rs36089015,3.07E-31,Skin_Sun_Exposed_Lower_leg	r2(rs13270870,rs36089015)=0.158	AF131215.9,rs13270870,1.69E-14	AF131215.9,rs11778398,2.26E-30,Lung	r2(rs13270870,rs11778398)=0.212	RP11-148O21.3,rs13270870,9.57E-10	RP11-148O21.3,rs5889367,2.67E-20,Cells_Transformed_fibroblasts	r2(rs13270870,rs5889367)=0.171	RP11-148O21.6,rs13270870,1.50E-09	RP11-148O21.6,rs5889367,5.88E-20,Cells_Transformed_fibroblasts	r2(rs13270870,rs5889367)=0.171	RP11-148O21.4,rs13270870,3.24E-09	RP11-148O21.4,rs5889367,2.72E-18,Cells_Transformed_fibroblasts	r2(rs13270870,rs5889367)=0.171	8	10913272	rs13270870	A	G	0.63	0.38	0.01	0.48							Smad3,TAL1			46 hits	XKR6	XKR6	intronic
248	rs10096511	10810451	XKR6	8	10952941	XKR6	6.457e-20	7	AF131215.2(Skin_Sun_Exposed_Lower_leg,2.86E-20);AF131215.9(Esophagus_Mucosa,2.74E-19);AF131215.9(Skin_Not_Sun_Exposed_Suprapubic,1.80E-17);AF131215.9(Lung,8.60E-17);AF131215.9(Skin_Sun_Exposed_Lower_leg,5.83E-16);AF131215.2(Skin_Not_Sun_Exposed_Suprapubic,8.97E-16);AF131215.2(Lung,1.44E-15);AF131215.9(Thyroid,3.23E-15);AF131215.2(Esophagus_Mucosa,1.59E-14);AF131215.2(Nerve_Tibial,1.82E-14);AF1312…	AF131215.2,rs10096511,2.86E-20	AF131215.2,rs36089015,3.07E-31,Skin_Sun_Exposed_Lower_leg	r2(rs10096511,rs36089015)=0.138	AF131215.9,rs10096511,2.74E-19	AF131215.9,rs11778398,2.26E-30,Lung	r2(rs10096511,rs11778398)=0.195	RP11-148O21.4,rs10096511,5.50E-11	RP11-148O21.4,rs5889367,2.72E-18,Cells_Transformed_fibroblasts	r2(rs10096511,rs5889367)=0.189	RP11-148O21.3,rs10096511,1.18E-10	RP11-148O21.3,rs5889367,2.67E-20,Cells_Transformed_fibroblasts	r2(rs10096511,rs5889367)=0.189	RP11-148O21.6,rs10096511,1.70E-10	RP11-148O21.6,rs5889367,5.88E-20,Cells_Transformed_fibroblasts	r2(rs10096511,rs5889367)=0.189	8	10952941	rs10096511	A	G	0.85	0.45	0.12	0.52							EBF			68 hits	XKR6	XKR6	intronic
249	rs11250097	10811829	XKR6	8	10954319	XKR6	1.318e-20	7	AF131215.2(Skin_Sun_Exposed_Lower_leg,5.65E-21);AF131215.9(Esophagus_Mucosa,7.15E-20);AF131215.9(Lung,9.88E-18);AF131215.9(Skin_Not_Sun_Exposed_Suprapubic,1.57E-17);AF131215.9(Skin_Sun_Exposed_Lower_leg,3.63E-17);AF131215.2(Lung,2.08E-16);AF131215.2(Heart_Atrial_Appendage,3.29E-16);AF131215.2(Skin_Not_Sun_Exposed_Suprapubic,1.01E-15);AF131215.9(Thyroid,1.33E-15);AF131215.2(Nerve_Tibial,4.72E-15);…	AF131215.2,rs11250097,5.65E-21	AF131215.2,rs36089015,3.07E-31,Skin_Sun_Exposed_Lower_leg	r2(rs11250097,rs36089015)=0.139	AF131215.9,rs11250097,7.15E-20	AF131215.9,rs11778398,2.26E-30,Lung	r2(rs11250097,rs11778398)=0.199	RP11-148O21.4,rs11250097,3.62E-12	RP11-148O21.4,rs5889367,2.72E-18,Cells_Transformed_fibroblasts	r2(rs11250097,rs5889367)=0.199	RP11-148O21.3,rs11250097,1.67E-11	RP11-148O21.3,rs5889367,2.67E-20,Cells_Transformed_fibroblasts	r2(rs11250097,rs5889367)=0.199	RP11-148O21.6,rs11250097,3.11E-11	RP11-148O21.6,rs5889367,5.88E-20,Cells_Transformed_fibroblasts	r2(rs11250097,rs5889367)=0.199	8	10954319	rs11250097	T	C	0.89	0.47	0.13	0.53										67 hits	XKR6	XKR6	intronic
250	rs35910832	10813197	XKR6	8	10955687	XKR6	3.89e-20	6	AF131215.2(Skin_Sun_Exposed_Lower_leg,4.79E-20);AF131215.9(Esophagus_Mucosa,4.56E-19);AF131215.9(Lung,9.88E-18);AF131215.9(Skin_Sun_Exposed_Lower_leg,3.83E-17);AF131215.9(Skin_Not_Sun_Exposed_Suprapubic,1.26E-16);AF131215.2(Lung,2.08E-16);AF131215.2(Heart_Atrial_Appendage,1.00E-15);AF131215.2(Nerve_Tibial,3.62E-15);AF131215.2(Skin_Not_Sun_Exposed_Suprapubic,8.17E-15);AF131215.2(Esophagus_Mucosa,9…	AF131215.2,rs35910832,4.79E-20	AF131215.2,rs36089015,3.07E-31,Skin_Sun_Exposed_Lower_leg	r2(rs35910832,rs36089015)=0.128	AF131215.9,rs35910832,4.56E-19	AF131215.9,rs11778398,2.26E-30,Lung	r2(rs35910832,rs11778398)=0.188	RP11-148O21.4,rs35910832,3.48E-12	RP11-148O21.4,rs5889367,2.72E-18,Cells_Transformed_fibroblasts	r2(rs35910832,rs5889367)=0.191	RP11-148O21.3,rs35910832,9.07E-12	RP11-148O21.3,rs5889367,2.67E-20,Cells_Transformed_fibroblasts	r2(rs35910832,rs5889367)=0.191	RP11-148O21.6,rs35910832,1.61E-11	RP11-148O21.6,rs5889367,5.88E-20,Cells_Transformed_fibroblasts	r2(rs35910832,rs5889367)=0.191	8	10955687	rs35910832	T	C	0.89	0.44	0.14	0.52							Foxo			67 hits	XKR6	XKR6	intronic
251	rs10096381	10813904	XKR6	8	10956394	XKR6	3.162e-19	7	AF131215.2(Skin_Sun_Exposed_Lower_leg,7.72E-20);AF131215.9(Esophagus_Mucosa,8.62E-19);AF131215.9(Skin_Not_Sun_Exposed_Suprapubic,1.04E-17);AF131215.9(Lung,8.56E-17);AF131215.9(Skin_Sun_Exposed_Lower_leg,8.21E-16);AF131215.2(Skin_Not_Sun_Exposed_Suprapubic,8.74E-16);AF131215.2(Lung,1.02E-15);AF131215.2(Nerve_Tibial,3.83E-14);AF131215.2(Esophagus_Mucosa,5.18E-14);AF131215.9(Thyroid,8.35E-14);AF1312…	AF131215.2,rs10096381,7.72E-20	AF131215.2,rs36089015,3.07E-31,Skin_Sun_Exposed_Lower_leg	r2(rs10096381,rs36089015)=0.127	AF131215.9,rs10096381,8.62E-19	AF131215.9,rs11778398,2.26E-30,Lung	r2(rs10096381,rs11778398)=0.184	RP11-148O21.4,rs10096381,2.95E-11	RP11-148O21.4,rs5889367,2.72E-18,Cells_Transformed_fibroblasts	r2(rs10096381,rs5889367)=0.174	RP11-148O21.3,rs10096381,4.58E-11	RP11-148O21.3,rs5889367,2.67E-20,Cells_Transformed_fibroblasts	r2(rs10096381,rs5889367)=0.174	RP11-148O21.6,rs10096381,6.53E-11	RP11-148O21.6,rs5889367,5.88E-20,Cells_Transformed_fibroblasts	r2(rs10096381,rs5889367)=0.174	8	10956394	rs10096381	G	T	0.84	0.44	0.13	0.52							DEC,E2A			68 hits	XKR6	XKR6	intronic
252	rs10111950	10815754	XKR6	8	10958244	XKR6	3.631e-20	5	AF131215.2(Skin_Sun_Exposed_Lower_leg,2.82E-20);AF131215.9(Esophagus_Mucosa,4.64E-19);AF131215.9(Lung,9.88E-18);AF131215.9(Skin_Sun_Exposed_Lower_leg,4.00E-17);AF131215.9(Skin_Not_Sun_Exposed_Suprapubic,7.90E-17);AF131215.2(Lung,2.08E-16);AF131215.2(Nerve_Tibial,4.09E-16);AF131215.2(Heart_Atrial_Appendage,1.04E-15);AF131215.2(Esophagus_Mucosa,9.94E-15);AF131215.2(Skin_Not_Sun_Exposed_Suprapubic,1…	AF131215.2,rs10111950,2.82E-20	AF131215.2,rs36089015,3.07E-31,Skin_Sun_Exposed_Lower_leg	r2(rs10111950,rs36089015)=0.128	AF131215.9,rs10111950,4.64E-19	AF131215.9,rs11778398,2.26E-30,Lung	r2(rs10111950,rs11778398)=0.188	RP11-148O21.4,rs10111950,1.21E-11	RP11-148O21.4,rs5889367,2.72E-18,Cells_Transformed_fibroblasts	r2(rs10111950,rs5889367)=0.195	RP11-148O21.3,rs10111950,1.60E-11	RP11-148O21.3,rs5889367,2.67E-20,Cells_Transformed_fibroblasts	r2(rs10111950,rs5889367)=0.195	RP11-148O21.6,rs10111950,2.46E-11	RP11-148O21.6,rs5889367,5.88E-20,Cells_Transformed_fibroblasts	r2(rs10111950,rs5889367)=0.195	8	10958244	rs10111950	C	G	0.88	0.44	0.12	0.52					5 tissues		AP-1			65 hits	XKR6	XKR6	intronic
253	rs4314618	10816772	XKR6	8	10959262	XKR6	2.239e-20	6	AF131215.2(Skin_Sun_Exposed_Lower_leg,2.41E-21);AF131215.9(Esophagus_Mucosa,1.75E-18);AF131215.9(Skin_Sun_Exposed_Lower_leg,2.30E-18);AF131215.9(Lung,9.66E-18);AF131215.2(Nerve_Tibial,7.31E-17);AF131215.2(Lung,1.16E-16);AF131215.9(Skin_Not_Sun_Exposed_Suprapubic,1.35E-16);AF131215.2(Heart_Atrial_Appendage,2.82E-15);AF131215.9(Thyroid,8.02E-15);AF131215.2(Esophagus_Mucosa,9.05E-15);AF131215.2(Skin…	AF131215.2,rs4314618,2.41E-21	AF131215.2,rs36089015,3.07E-31,Skin_Sun_Exposed_Lower_leg	r2(rs4314618,rs36089015)=0.134	AF131215.9,rs4314618,1.75E-18	AF131215.9,rs11778398,2.26E-30,Lung	r2(rs4314618,rs11778398)=0.196	RP11-148O21.3,rs4314618,9.67E-12	RP11-148O21.3,rs5889367,2.67E-20,Cells_Transformed_fibroblasts	r2(rs4314618,rs5889367)=0.198	RP11-148O21.6,rs4314618,1.26E-11	RP11-148O21.6,rs5889367,5.88E-20,Cells_Transformed_fibroblasts	r2(rs4314618,rs5889367)=0.198	RP11-148O21.4,rs4314618,1.77E-11	RP11-148O21.4,rs5889367,2.72E-18,Cells_Transformed_fibroblasts	r2(rs4314618,rs5889367)=0.198	8	10959262	rs4314618	A	G	0.88	0.44	0.12	0.53				MUS			8 altered motifs			63 hits	XKR6	XKR6	intronic
254	rs10088408	10817197	XKR6	8	10959687	XKR6	1.95e-20	5	AF131215.2(Skin_Sun_Exposed_Lower_leg,1.55E-21);AF131215.9(Skin_Sun_Exposed_Lower_leg,1.37E-18);AF131215.9(Esophagus_Mucosa,2.07E-18);AF131215.9(Lung,2.73E-18);AF131215.2(Nerve_Tibial,1.52E-17);AF131215.2(Lung,6.39E-17);AF131215.9(Skin_Not_Sun_Exposed_Suprapubic,1.35E-16);AF131215.2(Heart_Atrial_Appendage,2.75E-15);AF131215.9(Thyroid,4.55E-15);AF131215.2(Skin_Not_Sun_Exposed_Suprapubic,9.06E-15);…	AF131215.2,rs10088408,1.55E-21	AF131215.2,rs36089015,3.07E-31,Skin_Sun_Exposed_Lower_leg	r2(rs10088408,rs36089015)=0.131	AF131215.9,rs10088408,1.37E-18	AF131215.9,rs11778398,2.26E-30,Lung	r2(rs10088408,rs11778398)=0.194	RP11-148O21.3,rs10088408,1.07E-11	RP11-148O21.3,rs5889367,2.67E-20,Cells_Transformed_fibroblasts	r2(rs10088408,rs5889367)=0.198	RP11-148O21.6,rs10088408,1.38E-11	RP11-148O21.6,rs5889367,5.88E-20,Cells_Transformed_fibroblasts	r2(rs10088408,rs5889367)=0.198	RP11-148O21.4,rs10088408,2.67E-11	RP11-148O21.4,rs5889367,2.72E-18,Cells_Transformed_fibroblasts	r2(rs10088408,rs5889367)=0.198	8	10959687	rs10088408	C	T	0.88	0.44	0.12	0.52							RREB-1			66 hits	XKR6	XKR6	intronic
255	rs11250098	10818607	XKR6	8	10961097	XKR6	8.71e-21	5	AF131215.2(Skin_Sun_Exposed_Lower_leg,9.09E-23);AF131215.9(Esophagus_Mucosa,4.96E-20);AF131215.9(Skin_Sun_Exposed_Lower_leg,1.73E-19);AF131215.9(Skin_Not_Sun_Exposed_Suprapubic,6.17E-17);AF131215.2(Skin_Not_Sun_Exposed_Suprapubic,1.78E-16);AF131215.9(Lung,2.28E-16);AF131215.2(Lung,3.38E-16);AF131215.2(Esophagus_Mucosa,8.30E-16);AF131215.2(Nerve_Tibial,1.58E-15);AF131215.2(Heart_Atrial_Appendage,9…	AF131215.2,rs11250098,9.09E-23	AF131215.2,rs36089015,3.07E-31,Skin_Sun_Exposed_Lower_leg	r2(rs11250098,rs36089015)=0.149	AF131215.9,rs11250098,4.96E-20	AF131215.9,rs11778398,2.26E-30,Lung	r2(rs11250098,rs11778398)=0.196	RP11-148O21.6,rs11250098,1.28E-12	RP11-148O21.6,rs5889367,5.88E-20,Cells_Transformed_fibroblasts	r2(rs11250098,rs5889367)=0.157	RP11-148O21.3,rs11250098,8.39E-12	RP11-148O21.3,rs5889367,2.67E-20,Cells_Transformed_fibroblasts	r2(rs11250098,rs5889367)=0.157	RP11-148O21.4,rs11250098,4.04E-11	RP11-148O21.4,rs5889367,2.72E-18,Cells_Transformed_fibroblasts	r2(rs11250098,rs5889367)=0.157	8	10961097	rs11250098	A	G	0.73	0.44	0.12	0.52				7 tissues	IPSC		6 altered motifs			66 hits	XKR6	XKR6	intronic
256	rs11250099	10818657	XKR6	8	10961147	XKR6	3.388e-20	1f	AF131215.2(Skin_Sun_Exposed_Lower_leg,1.18E-21);AF131215.9(Esophagus_Mucosa,1.61E-19);AF131215.9(Skin_Not_Sun_Exposed_Suprapubic,2.03E-18);AF131215.9(Skin_Sun_Exposed_Lower_leg,4.00E-18);AF131215.9(Lung,4.38E-18);AF131215.2(Lung,5.00E-17);AF131215.2(Nerve_Tibial,8.51E-17);AF131215.2(Skin_Not_Sun_Exposed_Suprapubic,1.27E-16);AF131215.9(Thyroid,4.08E-15);AF131215.2(Heart_Atrial_Appendage,7.30E-15);…	AF131215.2,rs11250099,1.18E-21	AF131215.2,rs36089015,3.07E-31,Skin_Sun_Exposed_Lower_leg	r2(rs11250099,rs36089015)=0.133	AF131215.9,rs11250099,1.61E-19	AF131215.9,rs11778398,2.26E-30,Lung	r2(rs11250099,rs11778398)=0.197	RP11-148O21.6,rs11250099,2.39E-12	RP11-148O21.6,rs5889367,5.88E-20,Cells_Transformed_fibroblasts	r2(rs11250099,rs5889367)=0.185	RP11-148O21.3,rs11250099,2.54E-12	RP11-148O21.3,rs5889367,2.67E-20,Cells_Transformed_fibroblasts	r2(rs11250099,rs5889367)=0.185	RP11-148O21.4,rs11250099,1.72E-11	RP11-148O21.4,rs5889367,2.72E-18,Cells_Transformed_fibroblasts	r2(rs11250099,rs5889367)=0.185	8	10961147	rs11250099	A	G	0.85	0.45	0.12	0.53				7 tissues		P300	Pax-5		5 hits	69 hits	XKR6	XKR6	intronic
257	rs4841465	10819854	XKR6	8	10962344	XKR6	1.413e-20	5	AF131215.2(Skin_Sun_Exposed_Lower_leg,5.26E-21);AF131215.9(Esophagus_Mucosa,7.39E-19);AF131215.9(Lung,3.52E-18);AF131215.9(Skin_Not_Sun_Exposed_Suprapubic,6.27E-18);AF131215.9(Skin_Sun_Exposed_Lower_leg,9.20E-18);AF131215.2(Lung,7.50E-17);AF131215.2(Nerve_Tibial,3.37E-16);AF131215.9(Thyroid,9.62E-16);AF131215.2(Heart_Atrial_Appendage,1.37E-15);AF131215.2(Skin_Not_Sun_Exposed_Suprapubic,1.79E-15);…	AF131215.2,rs4841465,5.26E-21	AF131215.2,rs36089015,3.07E-31,Skin_Sun_Exposed_Lower_leg	r2(rs4841465,rs36089015)=0.131	AF131215.9,rs4841465,7.39E-19	AF131215.9,rs11778398,2.26E-30,Lung	r2(rs4841465,rs11778398)=0.187	RP11-148O21.3,rs4841465,7.53E-13	RP11-148O21.3,rs5889367,2.67E-20,Cells_Transformed_fibroblasts	r2(rs4841465,rs5889367)=0.198	RP11-148O21.4,rs4841465,1.90E-12	RP11-148O21.4,rs5889367,2.72E-18,Cells_Transformed_fibroblasts	r2(rs4841465,rs5889367)=0.198	RP11-148O21.6,rs4841465,3.57E-12	RP11-148O21.6,rs5889367,5.88E-20,Cells_Transformed_fibroblasts	r2(rs4841465,rs5889367)=0.198	8	10962344	rs4841465	C	T	0.88	0.44	0.12	0.52				5 tissues	BRN		BAF155,SIX5,Znf143			69 hits	XKR6	XKR6	intronic
258	rs10096421	10831868	XKR6	8	10974358	XKR6	1.738e-17	5	AF131215.2(Skin_Sun_Exposed_Lower_leg,4.35E-22);AF131215.9(Esophagus_Mucosa,2.33E-19);AF131215.9(Skin_Sun_Exposed_Lower_leg,1.39E-18);AF131215.9(Lung,2.04E-18);AF131215.9(Skin_Not_Sun_Exposed_Suprapubic,2.72E-18);AF131215.2(Lung,2.80E-17);AF131215.2(Nerve_Tibial,1.90E-16);AF131215.2(Skin_Not_Sun_Exposed_Suprapubic,2.44E-16);AF131215.9(Thyroid,2.64E-16);AF131215.2(Heart_Atrial_Appendage,5.87E-16);…	AF131215.2,rs10096421,4.35E-22	AF131215.2,rs36089015,3.07E-31,Skin_Sun_Exposed_Lower_leg	r2(rs10096421,rs36089015)=0.125	AF131215.9,rs10096421,2.33E-19	AF131215.9,rs11778398,2.26E-30,Lung	r2(rs10096421,rs11778398)=0.18	RP11-148O21.3,rs10096421,2.28E-12	RP11-148O21.3,rs5889367,2.67E-20,Cells_Transformed_fibroblasts	r2(rs10096421,rs5889367)=0.187	RP11-148O21.6,rs10096421,3.26E-12	RP11-148O21.6,rs5889367,5.88E-20,Cells_Transformed_fibroblasts	r2(rs10096421,rs5889367)=0.187	RP11-148O21.4,rs10096421,3.74E-12	RP11-148O21.4,rs5889367,2.72E-18,Cells_Transformed_fibroblasts	r2(rs10096421,rs5889367)=0.187	8	10974358	rs10096421	T	G	0.92	0.54	0.16	0.53					IPSC		Nanog			68 hits	XKR6	XKR6	intronic
259	rs10092831	10837414	XKR6	8	10979904	XKR6	5.495e-19	7	AF131215.2(Skin_Sun_Exposed_Lower_leg,3.72E-20);AF131215.2(Heart_Atrial_Appendage,1.12E-17);AF131215.2(Lung,1.84E-17);AF131215.9(Skin_Sun_Exposed_Lower_leg,2.99E-17);AF131215.9(Lung,1.22E-16);AF131215.2(Nerve_Tibial,6.71E-16);AF131215.9(Thyroid,1.17E-15);AF131215.9(Esophagus_Mucosa,1.73E-15);AF131215.9(Skin_Not_Sun_Exposed_Suprapubic,4.09E-15);AF131215.2(Thyroid,4.16E-14);AF131215.2(Skin_Not_Sun_…	AF131215.2,rs10092831,3.72E-20	AF131215.2,rs36089015,3.07E-31,Skin_Sun_Exposed_Lower_leg	r2(rs10092831,rs36089015)=0.153	AF131215.9,rs10092831,2.99E-17	AF131215.9,rs11778398,2.26E-30,Lung	r2(rs10092831,rs11778398)=0.2	RP11-148O21.4,rs10092831,8.03E-12	RP11-148O21.4,rs5889367,2.72E-18,Cells_Transformed_fibroblasts	r2(rs10092831,rs5889367)=0.178	RP11-148O21.6,rs10092831,4.17E-11	RP11-148O21.6,rs5889367,5.88E-20,Cells_Transformed_fibroblasts	r2(rs10092831,rs5889367)=0.178	RP11-148O21.3,rs10092831,1.33E-10	RP11-148O21.3,rs5889367,2.67E-20,Cells_Transformed_fibroblasts	r2(rs10092831,rs5889367)=0.178	8	10979904	rs10092831	A	C	0.75	0.44	0.08	0.51							4 altered motifs			63 hits	XKR6	XKR6	intronic
260	rs9969436	10842659	XKR6	8	10985149	XKR6	3.09e-19	7	AF131215.2(Skin_Sun_Exposed_Lower_leg,1.59E-23);AF131215.9(Skin_Sun_Exposed_Lower_leg,2.55E-20);AF131215.9(Lung,6.92E-19);AF131215.9(Esophagus_Mucosa,2.11E-18);AF131215.2(Nerve_Tibial,2.63E-18);AF131215.2(Lung,8.94E-18);AF131215.9(Skin_Not_Sun_Exposed_Suprapubic,1.04E-17);AF131215.2(Skin_Not_Sun_Exposed_Suprapubic,5.92E-17);AF131215.2(Heart_Atrial_Appendage,8.26E-17);AF131215.9(Thyroid,4.53E-16);…	AF131215.2,rs9969436,1.59E-23	AF131215.2,rs36089015,3.07E-31,Skin_Sun_Exposed_Lower_leg	r2(rs9969436,rs36089015)=0.167	AF131215.9,rs9969436,2.55E-20	AF131215.9,rs11778398,2.26E-30,Lung	r2(rs9969436,rs11778398)=0.23	RP11-148O21.4,rs9969436,2.79E-12	RP11-148O21.4,rs5889367,2.72E-18,Cells_Transformed_fibroblasts	r2(rs9969436,rs5889367)=0.258	RP11-148O21.3,rs9969436,5.14E-12	RP11-148O21.3,rs5889367,2.67E-20,Cells_Transformed_fibroblasts	r2(rs9969436,rs5889367)=0.258	RP11-148O21.6,rs9969436,8.16E-12	RP11-148O21.6,rs5889367,5.88E-20,Cells_Transformed_fibroblasts	r2(rs9969436,rs5889367)=0.258	8	10985149	rs9969436	T	G	0.9	0.43	0.02	0.52							GATA			66 hits	XKR6	XKR6	intronic
261	rs7011756	11019578	XKR6	8	11162068	XKR6	6.026e-17	5	AF131215.2(Skin_Sun_Exposed_Lower_leg,2.16E-24);AF131215.9(Esophagus_Mucosa,2.07E-22);AF131215.9(Skin_Not_Sun_Exposed_Suprapubic,2.17E-21);AF131215.9(Lung,3.95E-21);AF131215.9(Skin_Sun_Exposed_Lower_leg,1.11E-20);AF131215.2(Nerve_Tibial,2.31E-19);AF131215.2(Lung,1.12E-18);AF131215.9(Thyroid,9.40E-18);AF131215.2(Esophagus_Mucosa,1.18E-17);AF131215.2(Skin_Not_Sun_Exposed_Suprapubic,2.16E-17);AF1312…	AF131215.2,rs7011756,2.16E-24	AF131215.2,rs36089015,3.07E-31,Skin_Sun_Exposed_Lower_leg	r2(rs7011756,rs36089015)=0.196	AF131215.9,rs7011756,2.07E-22	AF131215.9,rs11778398,2.26E-30,Lung	r2(rs7011756,rs11778398)=0.288	RP11-148O21.6,rs7011756,7.37E-15	RP11-148O21.6,rs5889367,5.88E-20,Cells_Transformed_fibroblasts	r2(rs7011756,rs5889367)=0.25	RP11-148O21.3,rs7011756,1.68E-14	RP11-148O21.3,rs5889367,2.67E-20,Cells_Transformed_fibroblasts	r2(rs7011756,rs5889367)=0.25	RP11-148O21.4,rs7011756,3.98E-14	RP11-148O21.4,rs5889367,2.72E-18,Cells_Transformed_fibroblasts	r2(rs7011756,rs5889367)=0.25	8	11162068	rs7011756	C	G	0.94	0.4	0.06	0.52			BLD	ESDR, BLD			Foxk1,Foxp1,Pou2f2			80 hits	XKR6	XKR6	intronic
262	rs3021500	11023997	XKR6	8	11166488	XKR6	7.586e-17	7	AF131215.2(Skin_Sun_Exposed_Lower_leg,8.57E-25);AF131215.9(Esophagus_Mucosa,2.43E-23);AF131215.9(Skin_Not_Sun_Exposed_Suprapubic,1.88E-21);AF131215.9(Lung,6.83E-21);AF131215.9(Skin_Sun_Exposed_Lower_leg,2.90E-20);AF131215.2(Nerve_Tibial,7.74E-20);AF131215.2(Esophagus_Mucosa,2.53E-19);AF131215.2(Skin_Not_Sun_Exposed_Suprapubic,5.26E-19);AF131215.2(Lung,9.54E-19);AF131215.2(Thyroid,4.81E-17);AF1312…	AF131215.2,rs3021500,8.57E-25	AF131215.2,rs36089015,3.07E-31,Skin_Sun_Exposed_Lower_leg	r2(rs3021500,rs36089015)=0.197	AF131215.9,rs3021500,2.43E-23	AF131215.9,rs11778398,2.26E-30,Lung	r2(rs3021500,rs11778398)=0.289	RP11-148O21.6,rs3021500,4.26E-15	RP11-148O21.6,rs5889367,5.88E-20,Cells_Transformed_fibroblasts	r2(rs3021500,rs5889367)=0.256	RP11-148O21.3,rs3021500,1.02E-14	RP11-148O21.3,rs5889367,2.67E-20,Cells_Transformed_fibroblasts	r2(rs3021500,rs5889367)=0.256	RP11-148O21.4,rs3021500,6.12E-14	RP11-148O21.4,rs5889367,2.72E-18,Cells_Transformed_fibroblasts	r2(rs3021500,rs5889367)=0.256	8	11166488	rs3021500	G	C	0.93	0.41	0.06	0.53										83 hits	XKR6	XKR6	intronic
263	rs9969423	11255575	C8orf12	8	11398066	FAM167A-AS1	7.943e-18	6	AF131215.2(Skin_Sun_Exposed_Lower_leg,6.32E-16);AF131215.9(Skin_Sun_Exposed_Lower_leg,4.46E-13);AF131215.2(Nerve_Tibial,8.13E-13);AF131215.2(Esophagus_Mucosa,2.59E-12);AF131215.9(Thyroid,4.61E-11);AF131215.9(Nerve_Tibial,5.71E-10);AF131215.9(Esophagus_Mucosa,5.75E-10);AF131215.9(Lung,9.70E-10);AF131215.2(Testis,2.50E-09);AF131215.9(Heart_Atrial_Appendage,4.01E-09);AF131215.2(Thyroid,7.46E-09);RP1…	AF131215.2,rs9969423,6.32E-16	AF131215.2,rs36089015,3.07E-31,Skin_Sun_Exposed_Lower_leg	r2(rs9969423,rs36089015)=0.175	AF131215.9,rs9969423,4.46E-13	AF131215.9,rs11778398,2.26E-30,Lung	r2(rs9969423,rs11778398)=0.187	RP11-148O21.6,rs9969423,8.92E-09	RP11-148O21.6,rs5889367,5.88E-20,Cells_Transformed_fibroblasts	r2(rs9969423,rs5889367)=0.116	RP11-481A20.10,rs9969423,2.62E-08	RP11-481A20.10,rs6601641,1.94E-29,Brain_Cerebellum	r2(rs9969423,rs6601641)=0.105	RP11-148O21.4,rs9969423,3.45E-08	RP11-148O21.4,rs5889367,2.72E-18,Cells_Transformed_fibroblasts	r2(rs9969423,rs5889367)=0.116	8	11398066	rs9969423	A	C	0.25	0.35	0.08	0.5							5 altered motifs			47 hits	C8orf12	C8orf12	intronic
264	rs12156009	11285219	C8orf12	8	11427710	FAM167A	5.37e-12	7	AF131215.2(Skin_Sun_Exposed_Lower_leg,2.38E-09);FAM167A(Cells_Transformed_fibroblasts,2.57E-09);FAM66A(Brain_Caudate_basal_ganglia,3.06E-09);RP11-481A20.10(Brain_Cerebellar_Hemisphere,7.02E-09);AF131215.2(Esophagus_Mucosa,7.02E-09);AF131216.5(Stomach,1.37E-08);AF131215.2(Cells_EBV-transformed_lymphocytes,1.39E-08);RP11-481A20.11(Brain_Cerebellar_Hemisphere,1.73E-08);AF131215.9(Skin_Sun_Exposed_Lo…	AF131215.2,rs12156009,2.38E-09	AF131215.2,rs36089015,3.07E-31,Skin_Sun_Exposed_Lower_leg	r2(rs12156009,rs36089015)=0.128	FAM167A,rs12156009,2.57E-09	FAM167A,rs11777505,3.79E-53,Skin_Sun_Exposed_Lower_leg	r2(rs12156009,rs11777505)=0.211	FAM66A,rs12156009,3.06E-09	FAM66A,rs2739967,1.88E-21,Skin_Sun_Exposed_Lower_leg	r2(rs12156009,rs2739967)=0.001	RP11-481A20.10,rs12156009,7.02E-09	RP11-481A20.10,rs6601641,1.94E-29,Brain_Cerebellum	r2(rs12156009,rs6601641)=0.112	AF131216.5,rs12156009,1.37E-08	AF131216.5,rs56177149,3.22E-40,Pancreas	r2(rs12156009,rs56177149)=0.172	8	11427710	rs12156009	A	C	0.45	0.35	0.04	0.51			ESDR, ESC, IPSC	6 tissues			4 altered motifs			55 hits	FAM167A	FAM167A	intronic
265	rs13255193	11309192	FAM167A	8	11451683	FAM167A	2.455e-14	3a	AF131215.9(Thyroid,2.57E-14);AF131215.2(Skin_Sun_Exposed_Lower_leg,4.35E-14);FAM167A(Skin_Sun_Exposed_Lower_leg,5.75E-14);AF131215.2(Esophagus_Mucosa,1.15E-13);AF131215.2(Nerve_Tibial,2.28E-13);AF131215.2(Thyroid,7.96E-13);RP11-481A20.10(Brain_Cerebellum,1.45E-12);RP11-148O21.3(Cells_Transformed_fibroblasts,2.40E-12);RP11-148O21.6(Cells_Transformed_fibroblasts,8.94E-12);AF131215.9(Skin_Sun_Expose…	AF131215.9,rs13255193,2.57E-14	AF131215.9,rs11778398,2.26E-30,Lung	r2(rs13255193,rs11778398)=0.183	AF131215.2,rs13255193,4.35E-14	AF131215.2,rs36089015,3.07E-31,Skin_Sun_Exposed_Lower_leg	r2(rs13255193,rs36089015)=0.165	FAM167A,rs13255193,5.75E-14	FAM167A,rs11777505,3.79E-53,Skin_Sun_Exposed_Lower_leg	r2(rs13255193,rs11777505)=0.325	RP11-481A20.10,rs13255193,1.45E-12	RP11-481A20.10,rs6601641,1.94E-29,Brain_Cerebellum	r2(rs13255193,rs6601641)=0.148	RP11-148O21.3,rs13255193,2.40E-12	RP11-148O21.3,rs5889367,2.67E-20,Cells_Transformed_fibroblasts	r2(rs13255193,rs5889367)=0.174	8	11451683	rs13255193	T	C	0.43	0.4	0.01	0.55				7 tissues	8 tissues	USF1,USF2,MAX	5 altered motifs			60 hits	FAM167A	FAM167A	intronic
266	rs2409784	11396856	BLK	8	11539347	BLK	7.762e-20	1d	AF131215.9(Lung,4.43E-16);AF131215.2(Esophagus_Mucosa,1.52E-14);FAM66A(Brain_Caudate_basal_ganglia,2.18E-14);AF131215.2(Skin_Sun_Exposed_Lower_leg,2.31E-14);AF131215.9(Skin_Sun_Exposed_Lower_leg,2.99E-14);AF131215.9(Thyroid,1.17E-13);AF131215.9(Esophagus_Mucosa,1.22E-13);AF131215.2(Lung,1.82E-13);AF131215.2(Heart_Atrial_Appendage,1.97E-12);TDH(Thyroid,8.96E-12);RP11-148O21.3(Cells_Transformed_fib…	AF131215.9,rs2409784,4.43E-16	AF131215.9,rs11778398,2.26E-30,Lung	r2(rs2409784,rs11778398)=0.172	AF131215.2,rs2409784,1.52E-14	AF131215.2,rs36089015,3.07E-31,Skin_Sun_Exposed_Lower_leg	r2(rs2409784,rs36089015)=0.148	FAM66A,rs2409784,2.18E-14	FAM66A,rs2739967,1.88E-21,Skin_Sun_Exposed_Lower_leg	r2(rs2409784,rs2739967)=0.001	TDH,rs2409784,8.96E-12	TDH,rs56177149,5.19E-39,Pancreas	r2(rs2409784,rs56177149)=0.269	RP11-148O21.3,rs2409784,1.04E-11	RP11-148O21.3,rs5889367,2.67E-20,Cells_Transformed_fibroblasts	r2(rs2409784,rs5889367)=0.255	8	11539347	rs2409784	A	C	0.4	0.58	0.99	0.46			BLD	BLD, LNG	BLD,BLD	POL2,POL24H8,TBP	NRSF		12 hits	84 hits	BLK	BLK	intronic
267	rs11780851	11401116	BLK	8	11543607	BLK	1.82e-17	7	FAM66A(Brain_Caudate_basal_ganglia,3.40E-15);AF131215.2(Skin_Sun_Exposed_Lower_leg,1.75E-13);RP11-148O21.6(Cells_Transformed_fibroblasts,2.66E-13);AF131215.9(Skin_Sun_Exposed_Lower_leg,4.03E-13);AF131215.9(Lung,1.08E-12);RP11-148O21.3(Cells_Transformed_fibroblasts,1.69E-12);AF131215.9(Thyroid,6.79E-12);AF131215.2(Esophagus_Mucosa,1.57E-11);RP11-148O21.4(Cells_Transformed_fibroblasts,2.41E-11);AF1…	FAM66A,rs11780851,3.40E-15	FAM66A,rs2739967,1.88E-21,Skin_Sun_Exposed_Lower_leg	r2(rs11780851,rs2739967)=0.001	AF131215.2,rs11780851,1.75E-13	AF131215.2,rs36089015,3.07E-31,Skin_Sun_Exposed_Lower_leg	r2(rs11780851,rs36089015)=0.196	RP11-148O21.6,rs11780851,2.66E-13	RP11-148O21.6,rs5889367,5.88E-20,Cells_Transformed_fibroblasts	r2(rs11780851,rs5889367)=0.198	AF131215.9,rs11780851,4.03E-13	AF131215.9,rs11778398,2.26E-30,Lung	r2(rs11780851,rs11778398)=0.203	RP11-148O21.3,rs11780851,1.69E-12	RP11-148O21.3,rs5889367,2.67E-20,Cells_Transformed_fibroblasts	r2(rs11780851,rs5889367)=0.198	8	11543607	rs11780851	G	A	0.29	0.4	0	0.51				4 tissues	BLD		SIX5,STAT,Znf143			71 hits	BLK	BLK	intronic
268	rs6983727	11415812	BLK	8	11558303	BLK	2.399e-19	1f	RP11-148O21.6(Cells_Transformed_fibroblasts,1.91E-15);RP11-148O21.4(Cells_Transformed_fibroblasts,4.74E-15);AF131215.9(Esophagus_Mucosa,1.14E-14);RP11-148O21.3(Cells_Transformed_fibroblasts,1.37E-14);FAM66A(Brain_Caudate_basal_ganglia,3.01E-14);AF131215.2(Skin_Sun_Exposed_Lower_leg,5.15E-14);AF131215.2(Esophagus_Mucosa,1.41E-13);RP11-481A20.10(Brain_Cerebellum,5.13E-13);AF131215.9(Lung,5.19E-12);…	RP11-148O21.6,rs6983727,1.91E-15	RP11-148O21.6,rs5889367,5.88E-20,Cells_Transformed_fibroblasts	r2(rs6983727,rs5889367)=0.114	RP11-148O21.4,rs6983727,4.74E-15	RP11-148O21.4,rs5889367,2.72E-18,Cells_Transformed_fibroblasts	r2(rs6983727,rs5889367)=0.114	AF131215.9,rs6983727,1.14E-14	AF131215.9,rs11778398,2.26E-30,Lung	r2(rs6983727,rs11778398)=0.216	RP11-148O21.3,rs6983727,1.37E-14	RP11-148O21.3,rs5889367,2.67E-20,Cells_Transformed_fibroblasts	r2(rs6983727,rs5889367)=0.114	FAM66A,rs6983727,3.01E-14	FAM66A,rs2739967,1.88E-21,Skin_Sun_Exposed_Lower_leg	r2(rs6983727,rs2739967)=0.001	8	11558303	rs6983727	C	T	0.18	0.4	0.02	0.5			BLD	10 tissues	5 tissues				3 hits	68 hits	BLK	BLK	intronic
269	rs36048422	11417144	BLK	8	11559635	BLK	1.738e-19	2b	AF131215.2(Esophagus_Mucosa,1.11E-14);AF131215.9(Esophagus_Mucosa,1.17E-14);AF131215.2(Skin_Sun_Exposed_Lower_leg,1.64E-14);FAM66A(Brain_Caudate_basal_ganglia,1.08E-13);AF131215.9(Lung,2.40E-13);RP11-148O21.6(Cells_Transformed_fibroblasts,3.84E-12);RP11-148O21.4(Cells_Transformed_fibroblasts,5.99E-12);AF131215.9(Thyroid,7.75E-12);RP11-148O21.3(Cells_Transformed_fibroblasts,7.78E-12);AF131215.2(Lu…	AF131215.2,rs36048422,1.11E-14	AF131215.2,rs36089015,3.07E-31,Skin_Sun_Exposed_Lower_leg	r2(rs36048422,rs36089015)=0.186	AF131215.9,rs36048422,1.17E-14	AF131215.9,rs11778398,2.26E-30,Lung	r2(rs36048422,rs11778398)=0.19	FAM66A,rs36048422,1.08E-13	FAM66A,rs2739967,1.88E-21,Skin_Sun_Exposed_Lower_leg	r2(rs36048422,rs2739967)=0.001	RP11-148O21.6,rs36048422,3.84E-12	RP11-148O21.6,rs5889367,5.88E-20,Cells_Transformed_fibroblasts	r2(rs36048422,rs5889367)=0.127	RP11-148O21.4,rs36048422,5.99E-12	RP11-148O21.4,rs5889367,2.72E-18,Cells_Transformed_fibroblasts	r2(rs36048422,rs5889367)=0.127	8	11559635	rs36048422	T	C	0.29	0.4	0.02	0.52			BLD	BLD, FAT, THYM	4 tissues	POL2	5 altered motifs			66 hits	RP11-148O21.2	BLK	intronic
270	rs34190028	11417150	BLK	8	11559641	BLK	1.259e-19	2b	AF131215.2(Esophagus_Mucosa,1.11E-14);AF131215.9(Esophagus_Mucosa,1.17E-14);AF131215.2(Skin_Sun_Exposed_Lower_leg,1.64E-14);FAM66A(Brain_Caudate_basal_ganglia,1.08E-13);AF131215.9(Lung,2.40E-13);RP11-148O21.6(Cells_Transformed_fibroblasts,3.84E-12);RP11-148O21.4(Cells_Transformed_fibroblasts,5.99E-12);AF131215.9(Thyroid,7.75E-12);RP11-148O21.3(Cells_Transformed_fibroblasts,7.78E-12);AF131215.2(Lu…	AF131215.2,rs34190028,1.11E-14	AF131215.2,rs36089015,3.07E-31,Skin_Sun_Exposed_Lower_leg	r2(rs34190028,rs36089015)=0.193	AF131215.9,rs34190028,1.17E-14	AF131215.9,rs11778398,2.26E-30,Lung	r2(rs34190028,rs11778398)=0.199	FAM66A,rs34190028,1.08E-13	FAM66A,rs2739967,1.88E-21,Skin_Sun_Exposed_Lower_leg	r2(rs34190028,rs2739967)=0.001	RP11-148O21.6,rs34190028,3.84E-12	RP11-148O21.6,rs5889367,5.88E-20,Cells_Transformed_fibroblasts	r2(rs34190028,rs5889367)=0.14	RP11-148O21.4,rs34190028,5.99E-12	RP11-148O21.4,rs5889367,2.72E-18,Cells_Transformed_fibroblasts	r2(rs34190028,rs5889367)=0.14	8	11559641	rs34190028	G	T	0.29	0.38	0.01	0.52			BLD	BLD, FAT, THYM	BLD,THYM,PANC	POL2	4 altered motifs			67 hits	RP11-148O21.2	BLK	intronic
271	rs11783065	11417257	BLK	8	11559748	BLK	5.012e-20	4	AF131215.9(Esophagus_Mucosa,2.67E-14);AF131215.2(Esophagus_Mucosa,4.08E-14);AF131215.2(Skin_Sun_Exposed_Lower_leg,5.25E-14);FAM66A(Brain_Caudate_basal_ganglia,1.08E-13);AF131215.9(Lung,1.42E-13);AF131215.2(Lung,3.32E-12);RP11-148O21.6(Cells_Transformed_fibroblasts,4.37E-12);RP11-148O21.4(Cells_Transformed_fibroblasts,9.61E-12);AF131215.9(Thyroid,1.75E-11);RP11-148O21.3(Cells_Transformed_fibroblas…	AF131215.9,rs11783065,2.67E-14	AF131215.9,rs11778398,2.26E-30,Lung	r2(rs11783065,rs11778398)=0.19	AF131215.2,rs11783065,4.08E-14	AF131215.2,rs36089015,3.07E-31,Skin_Sun_Exposed_Lower_leg	r2(rs11783065,rs36089015)=0.185	FAM66A,rs11783065,1.08E-13	FAM66A,rs2739967,1.88E-21,Skin_Sun_Exposed_Lower_leg	r2(rs11783065,rs2739967)=0.001	RP11-148O21.6,rs11783065,4.37E-12	RP11-148O21.6,rs5889367,5.88E-20,Cells_Transformed_fibroblasts	r2(rs11783065,rs5889367)=0.127	RP11-148O21.4,rs11783065,9.61E-12	RP11-148O21.4,rs5889367,2.72E-18,Cells_Transformed_fibroblasts	r2(rs11783065,rs5889367)=0.127	8	11559748	rs11783065	A	G	0.29	0.4	0.02	0.52				BLD, THYM	IPSC,BLD,BLD	POL2	5 altered motifs			67 hits	RP11-148O21.2	BLK	intronic
272	rs1042701	11422045	BLK	8	11564536	BLK	4.467e-19	2c	RP11-148O21.4(Cells_Transformed_fibroblasts,2.55E-15);RP11-148O21.6(Cells_Transformed_fibroblasts,4.04E-15);AF131215.9(Esophagus_Mucosa,1.97E-14);RP11-148O21.3(Cells_Transformed_fibroblasts,2.42E-14);AF131215.2(Esophagus_Mucosa,5.28E-14);AF131215.2(Skin_Sun_Exposed_Lower_leg,5.44E-14);FAM66A(Brain_Caudate_basal_ganglia,9.85E-14);RP11-481A20.10(Brain_Cerebellum,6.03E-13);BLK(Cells_Transformed_fibr…	RP11-148O21.4,rs1042701,2.55E-15	RP11-148O21.4,rs5889367,2.72E-18,Cells_Transformed_fibroblasts	r2(rs1042701,rs5889367)=0.11	RP11-148O21.6,rs1042701,4.04E-15	RP11-148O21.6,rs5889367,5.88E-20,Cells_Transformed_fibroblasts	r2(rs1042701,rs5889367)=0.11	AF131215.9,rs1042701,1.97E-14	AF131215.9,rs11778398,2.26E-30,Lung	r2(rs1042701,rs11778398)=0.216	RP11-148O21.3,rs1042701,2.42E-14	RP11-148O21.3,rs5889367,2.67E-20,Cells_Transformed_fibroblasts	r2(rs1042701,rs5889367)=0.11	AF131215.2,rs1042701,5.28E-14	AF131215.2,rs36089015,3.07E-31,Skin_Sun_Exposed_Lower_leg	r2(rs1042701,rs36089015)=0.227	8	11564536	rs1042701	G	A	0.16	0.4	0.02	0.51					27 tissues	CTCF,CMYC	10 altered motifs			72 hits	BLK	BLK	3'-UTR
273	rs7843987	11422130	BLK	8	11564621	BLK	5.623e-19	4	RP11-148O21.4(Cells_Transformed_fibroblasts,1.42E-15);RP11-148O21.6(Cells_Transformed_fibroblasts,1.74E-15);RP11-148O21.3(Cells_Transformed_fibroblasts,9.07E-15);AF131215.9(Esophagus_Mucosa,9.80E-15);FAM66A(Brain_Caudate_basal_ganglia,3.04E-14);AF131215.2(Skin_Sun_Exposed_Lower_leg,1.28E-13);AF131215.2(Esophagus_Mucosa,1.38E-13);RP11-481A20.10(Brain_Cerebellum,1.95E-13);TDH(Thyroid,8.91E-12);BLK(…	RP11-148O21.4,rs7843987,1.42E-15	RP11-148O21.4,rs5889367,2.72E-18,Cells_Transformed_fibroblasts	r2(rs7843987,rs5889367)=0.11	RP11-148O21.6,rs7843987,1.74E-15	RP11-148O21.6,rs5889367,5.88E-20,Cells_Transformed_fibroblasts	r2(rs7843987,rs5889367)=0.11	RP11-148O21.3,rs7843987,9.07E-15	RP11-148O21.3,rs5889367,2.67E-20,Cells_Transformed_fibroblasts	r2(rs7843987,rs5889367)=0.11	AF131215.9,rs7843987,9.80E-15	AF131215.9,rs11778398,2.26E-30,Lung	r2(rs7843987,rs11778398)=0.216	FAM66A,rs7843987,3.04E-14	FAM66A,rs2739967,1.88E-21,Skin_Sun_Exposed_Lower_leg	r2(rs7843987,rs2739967)=0.001	8	11564621	rs7843987	T	C	0.16	0.4	0.02	0.51			16 tissues	10 tissues	31 tissues	15 bound proteins				70 hits	16bp 3' of BLK	21bp 3' of BLK
274	rs7822958	11422442	BLK	8	11564933	BLK	5.37e-19	4	RP11-148O21.4(Cells_Transformed_fibroblasts,1.42E-15);RP11-148O21.6(Cells_Transformed_fibroblasts,1.74E-15);RP11-148O21.3(Cells_Transformed_fibroblasts,9.07E-15);AF131215.9(Esophagus_Mucosa,9.80E-15);FAM66A(Brain_Caudate_basal_ganglia,3.04E-14);AF131215.2(Skin_Sun_Exposed_Lower_leg,1.28E-13);AF131215.2(Esophagus_Mucosa,1.38E-13);RP11-481A20.10(Brain_Cerebellum,1.95E-13);TDH(Thyroid,8.91E-12);BLK(…	RP11-148O21.4,rs7822958,1.42E-15	RP11-148O21.4,rs5889367,2.72E-18,Cells_Transformed_fibroblasts	r2(rs7822958,rs5889367)=0.109	RP11-148O21.6,rs7822958,1.74E-15	RP11-148O21.6,rs5889367,5.88E-20,Cells_Transformed_fibroblasts	r2(rs7822958,rs5889367)=0.109	RP11-148O21.3,rs7822958,9.07E-15	RP11-148O21.3,rs5889367,2.67E-20,Cells_Transformed_fibroblasts	r2(rs7822958,rs5889367)=0.109	AF131215.9,rs7822958,9.80E-15	AF131215.9,rs11778398,2.26E-30,Lung	r2(rs7822958,rs11778398)=0.213	FAM66A,rs7822958,3.04E-14	FAM66A,rs2739967,1.88E-21,Skin_Sun_Exposed_Lower_leg	r2(rs7822958,rs2739967)=0.001	8	11564933	rs7822958	C	A	0.16	0.4	0.02	0.51			15 tissues	15 tissues	31 tissues	POL24H8	Rad21,SP2			74 hits	328bp 3' of BLK	333bp 3' of BLK
275	rs4841564	11425809	BLK	8	11568300	BLK	2.399e-20	6	RP11-148O21.6(Cells_Transformed_fibroblasts,6.55E-16);RP11-148O21.4(Cells_Transformed_fibroblasts,1.00E-15);RP11-148O21.3(Cells_Transformed_fibroblasts,2.27E-15);AF131215.9(Esophagus_Mucosa,2.04E-14);AF131215.2(Skin_Sun_Exposed_Lower_leg,9.07E-14);AF131215.2(Esophagus_Mucosa,1.27E-13);FAM66A(Brain_Caudate_basal_ganglia,1.77E-13);AF131215.9(Thyroid,3.74E-12);AF131215.9(Lung,6.67E-12);BLK(Cells_Tra…	RP11-148O21.6,rs4841564,6.55E-16	RP11-148O21.6,rs5889367,5.88E-20,Cells_Transformed_fibroblasts	r2(rs4841564,rs5889367)=0.123	RP11-148O21.4,rs4841564,1.00E-15	RP11-148O21.4,rs5889367,2.72E-18,Cells_Transformed_fibroblasts	r2(rs4841564,rs5889367)=0.123	RP11-148O21.3,rs4841564,2.27E-15	RP11-148O21.3,rs5889367,2.67E-20,Cells_Transformed_fibroblasts	r2(rs4841564,rs5889367)=0.123	AF131215.9,rs4841564,2.04E-14	AF131215.9,rs11778398,2.26E-30,Lung	r2(rs4841564,rs11778398)=0.221	AF131215.2,rs4841564,9.07E-14	AF131215.2,rs36089015,3.07E-31,Skin_Sun_Exposed_Lower_leg	r2(rs4841564,rs36089015)=0.23	8	11568300	rs4841564	T	G	0.17	0.37	0.01	0.51				4 tissues	HRT		5 altered motifs			77 hits	3.7kb 3' of BLK	3.7kb 3' of BLK
276	rs1382563	11426790	BLK	8	11569281	BLK	5.37e-20	6	RP11-148O21.6(Cells_Transformed_fibroblasts,2.98E-15);RP11-148O21.4(Cells_Transformed_fibroblasts,3.41E-14);FAM66A(Brain_Caudate_basal_ganglia,4.56E-14);RP11-148O21.3(Cells_Transformed_fibroblasts,5.39E-14);AF131215.9(Esophagus_Mucosa,9.36E-14);RP11-481A20.10(Brain_Cerebellum,1.07E-13);AF131215.2(Esophagus_Mucosa,4.24E-13);AF131215.9(Thyroid,7.41E-13);AF131215.2(Skin_Sun_Exposed_Lower_leg,1.11E-1…	RP11-148O21.6,rs1382563,2.98E-15	RP11-148O21.6,rs5889367,5.88E-20,Cells_Transformed_fibroblasts	r2(rs1382563,rs5889367)=0.113	RP11-148O21.4,rs1382563,3.41E-14	RP11-148O21.4,rs5889367,2.72E-18,Cells_Transformed_fibroblasts	r2(rs1382563,rs5889367)=0.113	FAM66A,rs1382563,4.56E-14	FAM66A,rs2739967,1.88E-21,Skin_Sun_Exposed_Lower_leg	r2(rs1382563,rs2739967)=0.001	RP11-148O21.3,rs1382563,5.39E-14	RP11-148O21.3,rs5889367,2.67E-20,Cells_Transformed_fibroblasts	r2(rs1382563,rs5889367)=0.113	AF131215.9,rs1382563,9.36E-14	AF131215.9,rs11778398,2.26E-30,Lung	r2(rs1382563,rs11778398)=0.214	8	11569281	rs1382563	G	C	0.17	0.4	0.01	0.51				HRT, OVRY	HRT,KID,OVRY		Nkx2,Pou5f1		4 hits	77 hits	4.7kb 3' of BLK	4.7kb 3' of BLK
277	rs9650661	11427133	BLK	8	11569624	BLK	1.318e-12	5	RP11-148O21.6(Cells_Transformed_fibroblasts,1.08E-15);RP11-148O21.4(Cells_Transformed_fibroblasts,1.48E-15);RP11-148O21.3(Cells_Transformed_fibroblasts,4.55E-15);FAM66A(Brain_Caudate_basal_ganglia,4.73E-14);AF131215.9(Esophagus_Mucosa,7.03E-14);RP11-481A20.10(Brain_Cerebellum,9.07E-14);AF131215.2(Skin_Sun_Exposed_Lower_leg,2.35E-13);AF131215.2(Esophagus_Mucosa,5.04E-13);AF131215.9(Thyroid,5.60E-1…	RP11-148O21.6,rs9650661,1.08E-15	RP11-148O21.6,rs5889367,5.88E-20,Cells_Transformed_fibroblasts	r2(rs9650661,rs5889367)=NA	RP11-148O21.4,rs9650661,1.48E-15	RP11-148O21.4,rs5889367,2.72E-18,Cells_Transformed_fibroblasts	r2(rs9650661,rs5889367)=NA	RP11-148O21.3,rs9650661,4.55E-15	RP11-148O21.3,rs5889367,2.67E-20,Cells_Transformed_fibroblasts	r2(rs9650661,rs5889367)=NA	FAM66A,rs9650661,4.73E-14	FAM66A,rs2739967,1.88E-21,Skin_Sun_Exposed_Lower_leg	r2(rs9650661,rs2739967)=NA	AF131215.9,rs9650661,7.03E-14	AF131215.9,rs11778398,2.26E-30,Lung	r2(rs9650661,rs11778398)=NA	8	11569624	rs9650661	G	T	0.17	0.4	0.01	0.51				HRT, OVRY	BLD,HRT,OVRY	EBF1	24 altered motifs			74 hits	5kb 3' of BLK	5kb 3' of BLK
278	rs7831039	11427637	LINC00208	8	11570128	LINC00208	2.291e-20	1f	RP11-148O21.6(Cells_Transformed_fibroblasts,1.07E-15);RP11-148O21.4(Cells_Transformed_fibroblasts,1.78E-15);RP11-148O21.3(Cells_Transformed_fibroblasts,5.05E-15);FAM66A(Brain_Caudate_basal_ganglia,4.56E-14);AF131215.9(Esophagus_Mucosa,4.86E-14);RP11-481A20.10(Brain_Cerebellum,1.07E-13);AF131215.2(Skin_Sun_Exposed_Lower_leg,2.03E-13);AF131215.2(Esophagus_Mucosa,5.21E-13);AF131215.9(Thyroid,4.73E-1…	RP11-148O21.6,rs7831039,1.07E-15	RP11-148O21.6,rs5889367,5.88E-20,Cells_Transformed_fibroblasts	r2(rs7831039,rs5889367)=0.114	RP11-148O21.4,rs7831039,1.78E-15	RP11-148O21.4,rs5889367,2.72E-18,Cells_Transformed_fibroblasts	r2(rs7831039,rs5889367)=0.114	RP11-148O21.3,rs7831039,5.05E-15	RP11-148O21.3,rs5889367,2.67E-20,Cells_Transformed_fibroblasts	r2(rs7831039,rs5889367)=0.114	FAM66A,rs7831039,4.56E-14	FAM66A,rs2739967,1.88E-21,Skin_Sun_Exposed_Lower_leg	r2(rs7831039,rs2739967)=0.001	AF131215.9,rs7831039,4.86E-14	AF131215.9,rs11778398,2.26E-30,Lung	r2(rs7831039,rs11778398)=0.214	8	11570128	rs7831039	A	T	0.17	0.4	0.01	0.51				4 tissues	HRT,OVRY		AFP1		4 hits	77 hits	5.5kb 3' of BLK	5.5kb 3' of BLK
279	rs11991139	11428395	LINC00208	8	11570886	LINC00208	1.549e-20	7	RP11-148O21.6(Cells_Transformed_fibroblasts,1.07E-15);RP11-148O21.4(Cells_Transformed_fibroblasts,1.78E-15);RP11-148O21.3(Cells_Transformed_fibroblasts,5.05E-15);AF131215.9(Esophagus_Mucosa,4.86E-14);AF131215.2(Skin_Sun_Exposed_Lower_leg,7.46E-14);RP11-481A20.10(Brain_Cerebellum,2.69E-13);AF131215.2(Esophagus_Mucosa,5.21E-13);FAM66A(Brain_Caudate_basal_ganglia,7.31E-13);AF131215.9(Thyroid,4.73E-1…	RP11-148O21.6,rs11991139,1.07E-15	RP11-148O21.6,rs5889367,5.88E-20,Cells_Transformed_fibroblasts	r2(rs11991139,rs5889367)=0.111	RP11-148O21.4,rs11991139,1.78E-15	RP11-148O21.4,rs5889367,2.72E-18,Cells_Transformed_fibroblasts	r2(rs11991139,rs5889367)=0.111	RP11-148O21.3,rs11991139,5.05E-15	RP11-148O21.3,rs5889367,2.67E-20,Cells_Transformed_fibroblasts	r2(rs11991139,rs5889367)=0.111	AF131215.9,rs11991139,4.86E-14	AF131215.9,rs11778398,2.26E-30,Lung	r2(rs11991139,rs11778398)=0.217	AF131215.2,rs11991139,7.46E-14	AF131215.2,rs36089015,3.07E-31,Skin_Sun_Exposed_Lower_leg	r2(rs11991139,rs36089015)=0.227	8	11570886	rs11991139	C	T	0.17	0.4	0.01	0.51				SKIN, HRT, MUS	HRT		EWSR1-FLI1			78 hits	5.4kb 5' of LINC00208	5.6kb 5' of NCRNA00208
280	rs899366	11430485	LINC00208	8	11572976	LINC00208	1.514e-82	4	RP11-148O21.3(Cells_Transformed_fibroblasts,1.05E-12);RP11-148O21.4(Cells_Transformed_fibroblasts,1.38E-12);RP11-148O21.6(Cells_Transformed_fibroblasts,4.50E-12);AF131215.2(Thyroid,2.13E-10);AF131215.9(Thyroid,2.24E-09);AF131215.9(Skin_Sun_Exposed_Lower_leg,3.54E-08);AF131215.2(Skin_Sun_Exposed_Lower_leg,3.77E-08);FAM66A(Brain_Caudate_basal_ganglia,5.70E-08);AF131215.9(Esophagus_Mucosa,7.83E-08);…	RP11-148O21.3,rs899366,1.05E-12	RP11-148O21.3,rs5889367,2.67E-20,Cells_Transformed_fibroblasts	r2(rs899366,rs5889367)=0.182	RP11-148O21.4,rs899366,1.38E-12	RP11-148O21.4,rs5889367,2.72E-18,Cells_Transformed_fibroblasts	r2(rs899366,rs5889367)=0.182	RP11-148O21.6,rs899366,4.50E-12	RP11-148O21.6,rs5889367,5.88E-20,Cells_Transformed_fibroblasts	r2(rs899366,rs5889367)=0.182	AF131215.2,rs899366,2.13E-10	AF131215.2,rs36089015,3.07E-31,Skin_Sun_Exposed_Lower_leg	r2(rs899366,rs36089015)=0.103	AF131215.9,rs899366,2.24E-09	AF131215.9,rs11778398,2.26E-30,Lung	r2(rs899366,rs11778398)=0.125	8	11572976	rs899366	G	A	0.32	0.45	0.96	0.31			GI	13 tissues	11 tissues	CEBPB	Myb		4 hits	37 hits	3.3kb 5' of LINC00208	3.6kb 5' of NCRNA00208
281	rs12679960	11430990	LINC00208	8	11573481	LINC00208	2.042e-11	1d	RP11-148O21.3(Cells_Transformed_fibroblasts,2.23E-12);RP11-148O21.6(Cells_Transformed_fibroblasts,3.33E-12);RP11-148O21.4(Cells_Transformed_fibroblasts,1.50E-11);AF131215.2(Thyroid,5.62E-10);AF131215.9(Thyroid,3.57E-09);AF131215.9(Skin_Sun_Exposed_Lower_leg,5.65E-09);AF131215.9(Esophagus_Mucosa,5.25E-08);AF131215.2(Skin_Sun_Exposed_Lower_leg,6.01E-08);FAM66A(Brain_Caudate_basal_ganglia,6.21E-08)	RP11-148O21.3,rs12679960,2.23E-12	RP11-148O21.3,rs5889367,2.67E-20,Cells_Transformed_fibroblasts	r2(rs12679960,rs5889367)=0.239	RP11-148O21.6,rs12679960,3.33E-12	RP11-148O21.6,rs5889367,5.88E-20,Cells_Transformed_fibroblasts	r2(rs12679960,rs5889367)=0.239	RP11-148O21.4,rs12679960,1.50E-11	RP11-148O21.4,rs5889367,2.72E-18,Cells_Transformed_fibroblasts	r2(rs12679960,rs5889367)=0.239	AF131215.2,rs12679960,5.62E-10	AF131215.2,rs36089015,3.07E-31,Skin_Sun_Exposed_Lower_leg	r2(rs12679960,rs36089015)=0.093	AF131215.9,rs12679960,3.57E-09	AF131215.9,rs11778398,2.26E-30,Lung	r2(rs12679960,rs11778398)=0.119	8	11573481	rs12679960	C	T	0.2	0.44	0.96	0.3			HRT, GI	11 tissues	7 tissues		Pax-5,Rad21		2 hits	38 hits	2.8kb 5' of LINC00208	3.1kb 5' of NCRNA00208
282	rs35353728	11432453	LINC00208	8	11574944	LINC00208	1e-11	5	RP11-148O21.3(Cells_Transformed_fibroblasts,3.70E-13);RP11-148O21.6(Cells_Transformed_fibroblasts,1.04E-12);RP11-148O21.4(Cells_Transformed_fibroblasts,2.07E-12);AF131215.2(Thyroid,6.12E-10);AF131215.9(Thyroid,3.88E-09);AF131215.9(Skin_Sun_Exposed_Lower_leg,8.09E-09);FAM167A(Whole_Blood,3.57E-08);RP11-148O21.2(Cells_Transformed_fibroblasts,5.76E-08);AF131215.2(Skin_Sun_Exposed_Lower_leg,6.48E-08)…	RP11-148O21.3,rs35353728,3.70E-13	RP11-148O21.3,rs5889367,2.67E-20,Cells_Transformed_fibroblasts	r2(rs35353728,rs5889367)=0.277	RP11-148O21.6,rs35353728,1.04E-12	RP11-148O21.6,rs5889367,5.88E-20,Cells_Transformed_fibroblasts	r2(rs35353728,rs5889367)=0.277	RP11-148O21.4,rs35353728,2.07E-12	RP11-148O21.4,rs5889367,2.72E-18,Cells_Transformed_fibroblasts	r2(rs35353728,rs5889367)=0.277	AF131215.2,rs35353728,6.12E-10	AF131215.2,rs36089015,3.07E-31,Skin_Sun_Exposed_Lower_leg	r2(rs35353728,rs36089015)=0.082	AF131215.9,rs35353728,3.88E-09	AF131215.9,rs11778398,2.26E-30,Lung	r2(rs35353728,rs11778398)=0.102	8	11574944	rs35353728	C	T	0.09	0.43	0.96	0.3				5 tissues			10 altered motifs			36 hits	1.4kb 5' of LINC00208	1.6kb 5' of NCRNA00208
283	rs13256554	11432946	LINC00208	8	11575437	LINC00208	6.607e-21	7	AF131215.2(Esophagus_Mucosa,1.37E-16);RP11-148O21.4(Cells_Transformed_fibroblasts,1.76E-16);AF131215.2(Skin_Sun_Exposed_Lower_leg,1.62E-15);FAM66A(Brain_Caudate_basal_ganglia,1.87E-15);AF131215.9(Thyroid,9.04E-15);RP11-148O21.6(Cells_Transformed_fibroblasts,1.78E-14);AF131215.9(Esophagus_Mucosa,6.91E-14);AF131215.2(Nerve_Tibial,7.38E-14);RP11-148O21.3(Cells_Transformed_fibroblasts,8.93E-14);AF131…	AF131215.2,rs13256554,1.37E-16	AF131215.2,rs36089015,3.07E-31,Skin_Sun_Exposed_Lower_leg	r2(rs13256554,rs36089015)=0.197	RP11-148O21.4,rs13256554,1.76E-16	RP11-148O21.4,rs5889367,2.72E-18,Cells_Transformed_fibroblasts	r2(rs13256554,rs5889367)=0.158	FAM66A,rs13256554,1.87E-15	FAM66A,rs2739967,1.88E-21,Skin_Sun_Exposed_Lower_leg	r2(rs13256554,rs2739967)=0	AF131215.9,rs13256554,9.04E-15	AF131215.9,rs11778398,2.26E-30,Lung	r2(rs13256554,rs11778398)=0.212	RP11-148O21.6,rs13256554,1.78E-14	RP11-148O21.6,rs5889367,5.88E-20,Cells_Transformed_fibroblasts	r2(rs13256554,rs5889367)=0.158	8	11575437	rs13256554	C	A	0.39	0.44	0.01	0.53				HRT			4 altered motifs			89 hits	875bp 5' of LINC00208	1.1kb 5' of NCRNA00208
284	rs2409797	11433780	LINC00208	8	11576271	LINC00208	5.37e-21	5	AF131215.2(Esophagus_Mucosa,1.54E-17);FAM66A(Brain_Caudate_basal_ganglia,2.79E-15);AF131215.2(Skin_Sun_Exposed_Lower_leg,4.02E-15);AF131215.9(Thyroid,8.34E-15);AF131215.9(Lung,1.06E-14);AF131215.9(Esophagus_Mucosa,4.71E-14);AF131215.2(Lung,7.23E-14);AF131215.2(Nerve_Tibial,3.52E-13);RP11-148O21.4(Cells_Transformed_fibroblasts,5.18E-13);AF131215.9(Skin_Sun_Exposed_Lower_leg,6.89E-13);RP11-481A20.1…	AF131215.2,rs2409797,1.54E-17	AF131215.2,rs36089015,3.07E-31,Skin_Sun_Exposed_Lower_leg	r2(rs2409797,rs36089015)=0.144	FAM66A,rs2409797,2.79E-15	FAM66A,rs2739967,1.88E-21,Skin_Sun_Exposed_Lower_leg	r2(rs2409797,rs2739967)=0	AF131215.9,rs2409797,8.34E-15	AF131215.9,rs11778398,2.26E-30,Lung	r2(rs2409797,rs11778398)=0.171	RP11-148O21.4,rs2409797,5.18E-13	RP11-148O21.4,rs5889367,2.72E-18,Cells_Transformed_fibroblasts	r2(rs2409797,rs5889367)=0.238	RP11-481A20.10,rs2409797,2.58E-12	RP11-481A20.10,rs6601641,1.94E-29,Brain_Cerebellum	r2(rs2409797,rs6601641)=0.172	8	11576271	rs2409797	T	C	0.65	0.46	0.01	0.55				HRT			4 altered motifs			92 hits	41bp 5' of LINC00208	262bp 5' of NCRNA00208
285	rs2898290	11433909	LINC00208	8	11576400	LINC00208	1.148e-20	5	AF131215.2(Esophagus_Mucosa,4.05E-16);AF131215.2(Skin_Sun_Exposed_Lower_leg,5.87E-16);FAM66A(Brain_Caudate_basal_ganglia,6.77E-15);RP11-148O21.4(Cells_Transformed_fibroblasts,9.56E-15);AF131215.9(Thyroid,3.30E-14);AF131215.9(Esophagus_Mucosa,2.36E-13);RP11-148O21.6(Cells_Transformed_fibroblasts,2.46E-13);RP11-481A20.11(Brain_Cerebellar_Hemisphere,3.14E-13);RP11-148O21.3(Cells_Transformed_fibrobla…	AF131215.2,rs2898290,4.05E-16	AF131215.2,rs36089015,3.07E-31,Skin_Sun_Exposed_Lower_leg	r2(rs2898290,rs36089015)=0.156	FAM66A,rs2898290,6.77E-15	FAM66A,rs2739967,1.88E-21,Skin_Sun_Exposed_Lower_leg	r2(rs2898290,rs2739967)=0	RP11-148O21.4,rs2898290,9.56E-15	RP11-148O21.4,rs5889367,2.72E-18,Cells_Transformed_fibroblasts	r2(rs2898290,rs5889367)=0.213	AF131215.9,rs2898290,3.30E-14	AF131215.9,rs11778398,2.26E-30,Lung	r2(rs2898290,rs11778398)=0.18	RP11-148O21.6,rs2898290,2.46E-13	RP11-148O21.6,rs5889367,5.88E-20,Cells_Transformed_fibroblasts	r2(rs2898290,rs5889367)=0.213	8	11576400	rs2898290	T	C	0.58	0.46	0.01	0.54				LIV	OVRY,MUS		E2F,LBP-1		9 hits	95 hits	LINC00208	133bp 5' of NCRNA00208
286	rs7464263	11434176	LINC00208	8	11576667	LINC00208	3.802e-21	5	AF131215.2(Skin_Sun_Exposed_Lower_leg,2.07E-15);RP11-148O21.4(Cells_Transformed_fibroblasts,5.32E-15);AF131215.2(Esophagus_Mucosa,5.86E-15);FAM66A(Brain_Caudate_basal_ganglia,1.42E-14);AF131215.9(Thyroid,3.14E-14);RP11-148O21.6(Cells_Transformed_fibroblasts,6.74E-14);AF131215.9(Lung,2.11E-13);AF131215.2(Nerve_Tibial,3.64E-13);RP11-148O21.3(Cells_Transformed_fibroblasts,3.90E-13);RP11-481A20.11(Br…	AF131215.2,rs7464263,2.07E-15	AF131215.2,rs36089015,3.07E-31,Skin_Sun_Exposed_Lower_leg	r2(rs7464263,rs36089015)=0.16	RP11-148O21.4,rs7464263,5.32E-15	RP11-148O21.4,rs5889367,2.72E-18,Cells_Transformed_fibroblasts	r2(rs7464263,rs5889367)=0.199	FAM66A,rs7464263,1.42E-14	FAM66A,rs2739967,1.88E-21,Skin_Sun_Exposed_Lower_leg	r2(rs7464263,rs2739967)=0	AF131215.9,rs7464263,3.14E-14	AF131215.9,rs11778398,2.26E-30,Lung	r2(rs7464263,rs11778398)=0.18	RP11-148O21.6,rs7464263,6.74E-14	RP11-148O21.6,rs5889367,5.88E-20,Cells_Transformed_fibroblasts	r2(rs7464263,rs5889367)=0.199	8	11576667	rs7464263	A	T	0.55	0.46	0.01	0.54				LIV						96 hits	LINC00208	NCRNA00208
287	rs35558344	11434232	LINC00208	8	11576723	LINC00208	5.623e-21	5	AF131215.2(Esophagus_Mucosa,1.71E-15);AF131215.2(Skin_Sun_Exposed_Lower_leg,2.07E-15);RP11-148O21.4(Cells_Transformed_fibroblasts,7.17E-15);FAM66A(Brain_Caudate_basal_ganglia,1.42E-14);AF131215.9(Thyroid,1.98E-14);RP11-148O21.6(Cells_Transformed_fibroblasts,4.84E-14);AF131215.2(Nerve_Tibial,2.02E-13);RP11-148O21.3(Cells_Transformed_fibroblasts,2.28E-13);AF131215.9(Lung,4.05E-13);AF131215.9(Esopha…	AF131215.2,rs35558344,1.71E-15	AF131215.2,rs36089015,3.07E-31,Skin_Sun_Exposed_Lower_leg	r2(rs35558344,rs36089015)=0.158	RP11-148O21.4,rs35558344,7.17E-15	RP11-148O21.4,rs5889367,2.72E-18,Cells_Transformed_fibroblasts	r2(rs35558344,rs5889367)=0.197	FAM66A,rs35558344,1.42E-14	FAM66A,rs2739967,1.88E-21,Skin_Sun_Exposed_Lower_leg	r2(rs35558344,rs2739967)=0	AF131215.9,rs35558344,1.98E-14	AF131215.9,rs11778398,2.26E-30,Lung	r2(rs35558344,rs11778398)=0.176	RP11-148O21.6,rs35558344,4.84E-14	RP11-148O21.6,rs5889367,5.88E-20,Cells_Transformed_fibroblasts	r2(rs35558344,rs5889367)=0.197	8	11576723	rs35558344	C	T	0.55	0.45	0.01	0.54				LIV			Obox3			89 hits	LINC00208	NCRNA00208
288	rs2127127	11434792	LINC00208	8	11577283	LINC00208	1.122e-21	5	AF131215.2(Skin_Sun_Exposed_Lower_leg,1.08E-17);RP11-148O21.4(Cells_Transformed_fibroblasts,1.47E-16);AF131215.2(Esophagus_Mucosa,1.83E-16);FAM66A(Brain_Caudate_basal_ganglia,1.64E-15);AF131215.9(Thyroid,2.03E-15);AF131215.9(Esophagus_Mucosa,1.53E-14);RP11-148O21.6(Cells_Transformed_fibroblasts,2.23E-14);AF131215.2(Nerve_Tibial,8.89E-14);RP11-148O21.3(Cells_Transformed_fibroblasts,1.01E-13);AF131…	AF131215.2,rs2127127,1.08E-17	AF131215.2,rs36089015,3.07E-31,Skin_Sun_Exposed_Lower_leg	r2(rs2127127,rs36089015)=0.243	RP11-148O21.4,rs2127127,1.47E-16	RP11-148O21.4,rs5889367,2.72E-18,Cells_Transformed_fibroblasts	r2(rs2127127,rs5889367)=0.117	FAM66A,rs2127127,1.64E-15	FAM66A,rs2739967,1.88E-21,Skin_Sun_Exposed_Lower_leg	r2(rs2127127,rs2739967)=0.001	AF131215.9,rs2127127,2.03E-15	AF131215.9,rs11778398,2.26E-30,Lung	r2(rs2127127,rs11778398)=0.232	RP11-148O21.6,rs2127127,2.23E-14	RP11-148O21.6,rs5889367,5.88E-20,Cells_Transformed_fibroblasts	r2(rs2127127,rs5889367)=0.117	8	11577283	rs2127127	C	G	0.17	0.43	0.01	0.54							Pou2f2			94 hits	LINC00208	NCRNA00208
289	rs2127128	11434929	LINC00208	8	11577420	LINC00208	6.457e-12	5	RP11-148O21.6(Cells_Transformed_fibroblasts,2.67E-13);RP11-148O21.3(Cells_Transformed_fibroblasts,9.91E-13);RP11-148O21.4(Cells_Transformed_fibroblasts,1.47E-12);AF131215.2(Thyroid,6.14E-10);AF131215.9(Thyroid,6.36E-10);AF131215.9(Skin_Sun_Exposed_Lower_leg,5.95E-09);FAM90A25P(Skin_Sun_Exposed_Lower_leg,1.33E-08);ENPP7P12(Skin_Sun_Exposed_Lower_leg,1.64E-08);RP11-148O21.2(Cells_Transformed_fibrob…	RP11-148O21.6,rs2127128,2.67E-13	RP11-148O21.6,rs5889367,5.88E-20,Cells_Transformed_fibroblasts	r2(rs2127128,rs5889367)=0.23	RP11-148O21.3,rs2127128,9.91E-13	RP11-148O21.3,rs5889367,2.67E-20,Cells_Transformed_fibroblasts	r2(rs2127128,rs5889367)=0.23	RP11-148O21.4,rs2127128,1.47E-12	RP11-148O21.4,rs5889367,2.72E-18,Cells_Transformed_fibroblasts	r2(rs2127128,rs5889367)=0.23	AF131215.2,rs2127128,6.14E-10	AF131215.2,rs36089015,3.07E-31,Skin_Sun_Exposed_Lower_leg	r2(rs2127128,rs36089015)=0.088	AF131215.9,rs2127128,6.36E-10	AF131215.9,rs11778398,2.26E-30,Lung	r2(rs2127128,rs11778398)=0.102	8	11577420	rs2127128	C	T	0.77	0.56	0.04	0.7					THYM		9 altered motifs		4 hits	37 hits	LINC00208	NCRNA00208	intronic
290	rs35181953	11435049	LINC00208	8	11577540	LINC00208	2.239e-21	5	RP11-148O21.4(Cells_Transformed_fibroblasts,1.48E-16);AF131215.2(Esophagus_Mucosa,1.61E-16);FAM66A(Brain_Caudate_basal_ganglia,1.33E-15);AF131215.2(Skin_Sun_Exposed_Lower_leg,1.52E-15);RP11-148O21.6(Cells_Transformed_fibroblasts,9.39E-15);AF131215.9(Thyroid,1.15E-14);AF131215.9(Lung,3.65E-14);RP11-148O21.3(Cells_Transformed_fibroblasts,6.66E-14);AF131215.9(Esophagus_Mucosa,1.12E-13);AF131215.2(Ne…	RP11-148O21.4,rs35181953,1.48E-16	RP11-148O21.4,rs5889367,2.72E-18,Cells_Transformed_fibroblasts	r2(rs35181953,rs5889367)=0.161	AF131215.2,rs35181953,1.61E-16	AF131215.2,rs36089015,3.07E-31,Skin_Sun_Exposed_Lower_leg	r2(rs35181953,rs36089015)=0.197	FAM66A,rs35181953,1.33E-15	FAM66A,rs2739967,1.88E-21,Skin_Sun_Exposed_Lower_leg	r2(rs35181953,rs2739967)=0	RP11-148O21.6,rs35181953,9.39E-15	RP11-148O21.6,rs5889367,5.88E-20,Cells_Transformed_fibroblasts	r2(rs35181953,rs5889367)=0.161	AF131215.9,rs35181953,1.15E-14	AF131215.9,rs11778398,2.26E-30,Lung	r2(rs35181953,rs11778398)=0.213	8	11577540	rs35181953	G	A	0.4	0.44	0.01	0.54							CTCF,PPAR			92 hits	LINC00208	NCRNA00208	intronic
291	rs10108511	11435516	LINC00208	8	11578007	LINC00208	5.754e-21	5	AF131215.2(Esophagus_Mucosa,1.79E-17);AF131215.2(Skin_Sun_Exposed_Lower_leg,5.76E-15);FAM66A(Brain_Caudate_basal_ganglia,9.09E-15);AF131215.9(Thyroid,1.42E-14);AF131215.9(Esophagus_Mucosa,3.31E-14);AF131215.2(Nerve_Tibial,4.46E-14);AF131215.9(Lung,1.33E-13);RP11-148O21.6(Cells_Transformed_fibroblasts,1.69E-13);RP11-148O21.4(Cells_Transformed_fibroblasts,2.82E-13);AF131215.9(Skin_Sun_Exposed_Lower…	AF131215.2,rs10108511,1.79E-17	AF131215.2,rs36089015,3.07E-31,Skin_Sun_Exposed_Lower_leg	r2(rs10108511,rs36089015)=0.142	FAM66A,rs10108511,9.09E-15	FAM66A,rs2739967,1.88E-21,Skin_Sun_Exposed_Lower_leg	r2(rs10108511,rs2739967)=0	AF131215.9,rs10108511,1.42E-14	AF131215.9,rs11778398,2.26E-30,Lung	r2(rs10108511,rs11778398)=0.164	RP11-148O21.6,rs10108511,1.69E-13	RP11-148O21.6,rs5889367,5.88E-20,Cells_Transformed_fibroblasts	r2(rs10108511,rs5889367)=0.239	RP11-148O21.4,rs10108511,2.82E-13	RP11-148O21.4,rs5889367,2.72E-18,Cells_Transformed_fibroblasts	r2(rs10108511,rs5889367)=0.239	8	11578007	rs10108511	T	C	0.66	0.47	0.01	0.55							5 altered motifs			94 hits	LINC00208	NCRNA00208	intronic
292	rs2409798	11435564	LINC00208	8	11578055	LINC00208	6.607e-21	6	AF131215.2(Esophagus_Mucosa,8.09E-17);RP11-148O21.4(Cells_Transformed_fibroblasts,5.69E-16);FAM66A(Brain_Caudate_basal_ganglia,1.33E-15);AF131215.2(Skin_Sun_Exposed_Lower_leg,1.72E-15);AF131215.9(Thyroid,4.41E-15);RP11-148O21.6(Cells_Transformed_fibroblasts,2.24E-14);AF131215.9(Lung,7.00E-14);AF131215.9(Esophagus_Mucosa,9.75E-14);AF131215.2(Nerve_Tibial,1.29E-13);RP11-148O21.3(Cells_Transformed_f…	AF131215.2,rs2409798,8.09E-17	AF131215.2,rs36089015,3.07E-31,Skin_Sun_Exposed_Lower_leg	r2(rs2409798,rs36089015)=0.196	RP11-148O21.4,rs2409798,5.69E-16	RP11-148O21.4,rs5889367,2.72E-18,Cells_Transformed_fibroblasts	r2(rs2409798,rs5889367)=0.161	FAM66A,rs2409798,1.33E-15	FAM66A,rs2739967,1.88E-21,Skin_Sun_Exposed_Lower_leg	r2(rs2409798,rs2739967)=0	AF131215.9,rs2409798,4.41E-15	AF131215.9,rs11778398,2.26E-30,Lung	r2(rs2409798,rs11778398)=0.213	RP11-148O21.6,rs2409798,2.24E-14	RP11-148O21.6,rs5889367,5.88E-20,Cells_Transformed_fibroblasts	r2(rs2409798,rs5889367)=0.161	8	11578055	rs2409798	C	T	0.41	0.44	0.01	0.54				HRT, MUS	OVRY		EWSR1-FLI1,SP1,TATA			95 hits	LINC00208	NCRNA00208	intronic
293	rs2409799	11435927	LINC00208	8	11578418	LINC00208	9.772e-21	5	AF131215.2(Esophagus_Mucosa,9.60E-17);FAM66A(Brain_Caudate_basal_ganglia,2.65E-16);AF131215.2(Skin_Sun_Exposed_Lower_leg,1.21E-15);RP11-148O21.4(Cells_Transformed_fibroblasts,5.58E-15);AF131215.9(Esophagus_Mucosa,4.36E-14);AF131215.9(Thyroid,9.39E-14);RP11-148O21.6(Cells_Transformed_fibroblasts,1.28E-13);AF131215.2(Nerve_Tibial,2.00E-13);AF131215.9(Lung,9.51E-13);AF131215.9(Skin_Sun_Exposed_Lower…	AF131215.2,rs2409799,9.60E-17	AF131215.2,rs36089015,3.07E-31,Skin_Sun_Exposed_Lower_leg	r2(rs2409799,rs36089015)=0.183	FAM66A,rs2409799,2.65E-16	FAM66A,rs2739967,1.88E-21,Skin_Sun_Exposed_Lower_leg	r2(rs2409799,rs2739967)=0	RP11-148O21.4,rs2409799,5.58E-15	RP11-148O21.4,rs5889367,2.72E-18,Cells_Transformed_fibroblasts	r2(rs2409799,rs5889367)=0.177	AF131215.9,rs2409799,4.36E-14	AF131215.9,rs11778398,2.26E-30,Lung	r2(rs2409799,rs11778398)=0.202	RP11-148O21.6,rs2409799,1.28E-13	RP11-148O21.6,rs5889367,5.88E-20,Cells_Transformed_fibroblasts	r2(rs2409799,rs5889367)=0.177	8	11578418	rs2409799	G	C	0.45	0.44	0.01	0.55				4 tissues	MUS		7 altered motifs			97 hits	LINC00208	NCRNA00208
294	rs968179	11438064	LINC00208	8	11580555	LINC00208	5.37e-12	5	RP11-148O21.3(Cells_Transformed_fibroblasts,2.80E-12);RP11-148O21.6(Cells_Transformed_fibroblasts,3.60E-12);RP11-148O21.4(Cells_Transformed_fibroblasts,5.19E-12);AF131215.2(Thyroid,7.09E-10);AF131215.9(Thyroid,3.61E-09);AF131215.9(Skin_Sun_Exposed_Lower_leg,5.46E-09);AF131215.2(Skin_Sun_Exposed_Lower_leg,1.94E-08);ENPP7P12(Skin_Sun_Exposed_Lower_leg,2.18E-08);RP11-148O21.2(Cells_Transformed_fibro…	RP11-148O21.3,rs968179,2.80E-12	RP11-148O21.3,rs5889367,2.67E-20,Cells_Transformed_fibroblasts	r2(rs968179,rs5889367)=0.256	RP11-148O21.6,rs968179,3.60E-12	RP11-148O21.6,rs5889367,5.88E-20,Cells_Transformed_fibroblasts	r2(rs968179,rs5889367)=0.256	RP11-148O21.4,rs968179,5.19E-12	RP11-148O21.4,rs5889367,2.72E-18,Cells_Transformed_fibroblasts	r2(rs968179,rs5889367)=0.256	AF131215.2,rs968179,7.09E-10	AF131215.2,rs36089015,3.07E-31,Skin_Sun_Exposed_Lower_leg	r2(rs968179,rs36089015)=0.079	AF131215.9,rs968179,3.61E-09	AF131215.9,rs11778398,2.26E-30,Lung	r2(rs968179,rs11778398)=0.1	8	11580555	rs968179	G	T	0.1	0.43	0.94	0.3				HRT, MUS, GI	HRT		SRF,TATA,ZNF263		4 hits	42 hits	LINC00208	NCRNA00208
295	rs12677326	11439225	LINC00208	8	11581716	LINC00208	3.715e-14	7	RP11-148O21.3(Cells_Transformed_fibroblasts,2.41E-14);RP11-148O21.4(Cells_Transformed_fibroblasts,5.66E-14);RP11-148O21.6(Cells_Transformed_fibroblasts,5.90E-13);RP11-148O21.2(Cells_Transformed_fibroblasts,1.28E-10);AF131215.9(Thyroid,2.88E-09);AF131215.2(Thyroid,3.60E-08)	RP11-148O21.3,rs12677326,2.41E-14	RP11-148O21.3,rs5889367,2.67E-20,Cells_Transformed_fibroblasts	r2(rs12677326,rs5889367)=0.218	RP11-148O21.4,rs12677326,5.66E-14	RP11-148O21.4,rs5889367,2.72E-18,Cells_Transformed_fibroblasts	r2(rs12677326,rs5889367)=0.218	RP11-148O21.6,rs12677326,5.90E-13	RP11-148O21.6,rs5889367,5.88E-20,Cells_Transformed_fibroblasts	r2(rs12677326,rs5889367)=0.218	RP11-148O21.2,rs12677326,1.28E-10	RP11-148O21.2,rs5889367,5.75E-16,Cells_Transformed_fibroblasts	r2(rs12677326,rs5889367)=0.218	AF131215.9,rs12677326,2.88E-09	AF131215.9,rs11778398,2.26E-30,Lung	r2(rs12677326,rs11778398)=0.099	8	11581716	rs12677326	G	A	0.26	0.43	0.93	0.29				HRT					5 hits	38 hits	373bp 3' of LINC00208	374bp 3' of NCRNA00208
296	rs11250149	11439961	LINC00208	8	11582452	LINC00208	3.02e-14	6	RP11-148O21.3(Cells_Transformed_fibroblasts,1.73E-15);RP11-148O21.4(Cells_Transformed_fibroblasts,1.85E-15);RP11-148O21.6(Cells_Transformed_fibroblasts,1.95E-15);RP11-148O21.2(Cells_Transformed_fibroblasts,1.77E-11);AF131215.9(Thyroid,8.93E-09);FAM66A(Brain_Caudate_basal_ganglia,1.95E-08);FAM66A(Brain_Cerebellar_Hemisphere,6.06E-08)	RP11-148O21.3,rs11250149,1.73E-15	RP11-148O21.3,rs5889367,2.67E-20,Cells_Transformed_fibroblasts	r2(rs11250149,rs5889367)=0.259	RP11-148O21.4,rs11250149,1.85E-15	RP11-148O21.4,rs5889367,2.72E-18,Cells_Transformed_fibroblasts	r2(rs11250149,rs5889367)=0.259	RP11-148O21.6,rs11250149,1.95E-15	RP11-148O21.6,rs5889367,5.88E-20,Cells_Transformed_fibroblasts	r2(rs11250149,rs5889367)=0.259	RP11-148O21.2,rs11250149,1.77E-11	RP11-148O21.2,rs5889367,5.75E-16,Cells_Transformed_fibroblasts	r2(rs11250149,rs5889367)=0.259	AF131215.9,rs11250149,8.93E-09	AF131215.9,rs11778398,2.26E-30,Lung	r2(rs11250149,rs11778398)=0.124	8	11582452	rs11250149	C	G	0.09	0.4	0.92	0.31				HRT, MUS	OVRY				3 hits	38 hits	1.1kb 3' of LINC00208	1.1kb 3' of NCRNA00208
297	rs4841567	11440019	LINC00208	8	11582510	LINC00208	2.818e-21	7	RP11-148O21.4(Cells_Transformed_fibroblasts,1.26E-17);AF131215.2(Skin_Sun_Exposed_Lower_leg,4.00E-17);AF131215.9(Esophagus_Mucosa,6.60E-17);AF131215.9(Thyroid,2.26E-16);RP11-148O21.6(Cells_Transformed_fibroblasts,4.60E-16);AF131215.2(Esophagus_Mucosa,5.22E-16);FAM66A(Brain_Caudate_basal_ganglia,9.35E-15);RP11-148O21.3(Cells_Transformed_fibroblasts,1.03E-14);AF131215.2(Nerve_Tibial,3.01E-14);AF131…	RP11-148O21.4,rs4841567,1.26E-17	RP11-148O21.4,rs5889367,2.72E-18,Cells_Transformed_fibroblasts	r2(rs4841567,rs5889367)=0.124	AF131215.2,rs4841567,4.00E-17	AF131215.2,rs36089015,3.07E-31,Skin_Sun_Exposed_Lower_leg	r2(rs4841567,rs36089015)=0.253	AF131215.9,rs4841567,6.60E-17	AF131215.9,rs11778398,2.26E-30,Lung	r2(rs4841567,rs11778398)=0.242	RP11-148O21.6,rs4841567,4.60E-16	RP11-148O21.6,rs5889367,5.88E-20,Cells_Transformed_fibroblasts	r2(rs4841567,rs5889367)=0.124	FAM66A,rs4841567,9.35E-15	FAM66A,rs2739967,1.88E-21,Skin_Sun_Exposed_Lower_leg	r2(rs4841567,rs2739967)=0.001	8	11582510	rs4841567	G	A	0.2	0.42	0.01	0.55				HRT, MUS						100 hits	1.2kb 3' of LINC00208	1.2kb 3' of NCRNA00208
298	rs4840572	11443204	LINC00208	8	11585695	LINC00208	7.586e-15	7	RP11-148O21.3(Cells_Transformed_fibroblasts,2.32E-15);RP11-148O21.6(Cells_Transformed_fibroblasts,6.43E-15);RP11-148O21.4(Cells_Transformed_fibroblasts,9.78E-15);RP11-148O21.2(Cells_Transformed_fibroblasts,9.87E-12);FAM66A(Brain_Caudate_basal_ganglia,5.20E-09);AF131215.9(Thyroid,7.88E-09);RP11-481A20.10(Brain_Frontal_Cortex_BA9,4.04E-08);FAM167A(Whole_Blood,8.64E-08)	RP11-148O21.3,rs4840572,2.32E-15	RP11-148O21.3,rs5889367,2.67E-20,Cells_Transformed_fibroblasts	r2(rs4840572,rs5889367)=0.258	RP11-148O21.6,rs4840572,6.43E-15	RP11-148O21.6,rs5889367,5.88E-20,Cells_Transformed_fibroblasts	r2(rs4840572,rs5889367)=0.258	RP11-148O21.4,rs4840572,9.78E-15	RP11-148O21.4,rs5889367,2.72E-18,Cells_Transformed_fibroblasts	r2(rs4840572,rs5889367)=0.258	RP11-148O21.2,rs4840572,9.87E-12	RP11-148O21.2,rs5889367,5.75E-16,Cells_Transformed_fibroblasts	r2(rs4840572,rs5889367)=0.258	FAM66A,rs4840572,5.20E-09	FAM66A,rs2739967,1.88E-21,Skin_Sun_Exposed_Lower_leg	r2(rs4840572,rs2739967)=0.001	8	11585695	rs4840572	G	A	0.12	0.42	0.94	0.3							BAF155			37 hits	4.4kb 3' of LINC00208	4.4kb 3' of NCRNA00208
299	rs10097870	11444516	LINC00208	8	11587007	LINC00208	3.981e-21	5	AF131215.2(Skin_Sun_Exposed_Lower_leg,4.74E-17);RP11-148O21.4(Cells_Transformed_fibroblasts,2.88E-15);AF131215.2(Esophagus_Mucosa,7.15E-15);AF131215.9(Esophagus_Mucosa,7.52E-15);RP11-148O21.3(Cells_Transformed_fibroblasts,1.39E-14);FAM66A(Brain_Caudate_basal_ganglia,2.18E-14);AF131215.9(Thyroid,3.68E-14);RP11-148O21.6(Cells_Transformed_fibroblasts,4.72E-14);AF131215.9(Nerve_Tibial,6.22E-14);AF131…	AF131215.2,rs10097870,4.74E-17	AF131215.2,rs36089015,3.07E-31,Skin_Sun_Exposed_Lower_leg	r2(rs10097870,rs36089015)=0.185	RP11-148O21.4,rs10097870,2.88E-15	RP11-148O21.4,rs5889367,2.72E-18,Cells_Transformed_fibroblasts	r2(rs10097870,rs5889367)=0.185	AF131215.9,rs10097870,7.52E-15	AF131215.9,rs11778398,2.26E-30,Lung	r2(rs10097870,rs11778398)=0.189	RP11-148O21.3,rs10097870,1.39E-14	RP11-148O21.3,rs5889367,2.67E-20,Cells_Transformed_fibroblasts	r2(rs10097870,rs5889367)=0.185	FAM66A,rs10097870,2.18E-14	FAM66A,rs2739967,1.88E-21,Skin_Sun_Exposed_Lower_leg	r2(rs10097870,rs2739967)=0	8	11587007	rs10097870	G	A	0.58	0.57	0.99	0.44					6 tissues		SREBP			87 hits	5.7kb 3' of LINC00208	5.7kb 3' of NCRNA00208
300	rs13270267	11444837	LINC00208	8	11587328	LINC00208	7.413e-21	7	AF131215.2(Skin_Sun_Exposed_Lower_leg,4.90E-18);AF131215.9(Esophagus_Mucosa,1.02E-16);AF131215.9(Thyroid,3.12E-16);AF131215.2(Esophagus_Mucosa,1.02E-15);RP11-148O21.4(Cells_Transformed_fibroblasts,1.91E-15);RP11-148O21.6(Cells_Transformed_fibroblasts,4.91E-15);AF131215.9(Skin_Sun_Exposed_Lower_leg,5.88E-15);RP11-148O21.3(Cells_Transformed_fibroblasts,1.85E-14);AF131215.2(Nerve_Tibial,8.51E-14);AF…	AF131215.2,rs13270267,4.90E-18	AF131215.2,rs36089015,3.07E-31,Skin_Sun_Exposed_Lower_leg	r2(rs13270267,rs36089015)=0.145	AF131215.9,rs13270267,1.02E-16	AF131215.9,rs11778398,2.26E-30,Lung	r2(rs13270267,rs11778398)=0.167	RP11-148O21.4,rs13270267,1.91E-15	RP11-148O21.4,rs5889367,2.72E-18,Cells_Transformed_fibroblasts	r2(rs13270267,rs5889367)=0.262	RP11-148O21.6,rs13270267,4.91E-15	RP11-148O21.6,rs5889367,5.88E-20,Cells_Transformed_fibroblasts	r2(rs13270267,rs5889367)=0.262	RP11-148O21.3,rs13270267,1.85E-14	RP11-148O21.3,rs5889367,2.67E-20,Cells_Transformed_fibroblasts	r2(rs13270267,rs5889367)=0.262	8	11587328	rs13270267	C	T	0.25	0.56	0.99	0.44				5 tissues	HRT		BCL,LBP-9			93 hits	6kb 3' of LINC00208	6kb 3' of NCRNA00208
301	rs11780420	11446421	LINC00208	8	11588912	LINC00208	2.188e-20	5	RP11-148O21.4(Cells_Transformed_fibroblasts,5.92E-17);AF131215.9(Thyroid,1.19E-14);FAM66A(Brain_Caudate_basal_ganglia,3.32E-14);AF131215.2(Esophagus_Mucosa,4.12E-14);RP11-148O21.3(Cells_Transformed_fibroblasts,4.51E-14);AF131215.9(Esophagus_Mucosa,7.25E-14);RP11-148O21.6(Cells_Transformed_fibroblasts,4.34E-13);RP11-481A20.10(Brain_Cerebellum,4.45E-13);AF131215.2(Skin_Sun_Exposed_Lower_leg,5.69E-1…	RP11-148O21.4,rs11780420,5.92E-17	RP11-148O21.4,rs5889367,2.72E-18,Cells_Transformed_fibroblasts	r2(rs11780420,rs5889367)=0.143	AF131215.9,rs11780420,1.19E-14	AF131215.9,rs11778398,2.26E-30,Lung	r2(rs11780420,rs11778398)=0.197	FAM66A,rs11780420,3.32E-14	FAM66A,rs2739967,1.88E-21,Skin_Sun_Exposed_Lower_leg	r2(rs11780420,rs2739967)=0	AF131215.2,rs11780420,4.12E-14	AF131215.2,rs36089015,3.07E-31,Skin_Sun_Exposed_Lower_leg	r2(rs11780420,rs36089015)=0.2	RP11-148O21.3,rs11780420,4.51E-14	RP11-148O21.3,rs5889367,2.67E-20,Cells_Transformed_fibroblasts	r2(rs11780420,rs5889367)=0.143	8	11588912	rs11780420	G	A	0.27	0.41	0.03	0.57				6 tissues			PLAG1			63 hits	7.6kb 3' of LINC00208	7.6kb 3' of NCRNA00208
302	rs11250150	11446637	LINC00208	8	11589128	LINC00208	6.761e-20	5	RP11-148O21.4(Cells_Transformed_fibroblasts,7.26E-16);FAM66A(Brain_Caudate_basal_ganglia,7.83E-15);RP11-148O21.3(Cells_Transformed_fibroblasts,1.96E-13);RP11-148O21.6(Cells_Transformed_fibroblasts,3.57E-13);AF131215.9(Thyroid,2.00E-12);RP11-481A20.10(Brain_Cerebellum,2.21E-12);AF131215.9(Esophagus_Mucosa,5.05E-12);AF131215.2(Esophagus_Mucosa,9.09E-12);FDFT1(Artery_Tibial,1.29E-10);AF131215.2(Skin…	RP11-148O21.4,rs11250150,7.26E-16	RP11-148O21.4,rs5889367,2.72E-18,Cells_Transformed_fibroblasts	r2(rs11250150,rs5889367)=0.174	FAM66A,rs11250150,7.83E-15	FAM66A,rs2739967,1.88E-21,Skin_Sun_Exposed_Lower_leg	r2(rs11250150,rs2739967)=0	RP11-148O21.3,rs11250150,1.96E-13	RP11-148O21.3,rs5889367,2.67E-20,Cells_Transformed_fibroblasts	r2(rs11250150,rs5889367)=0.174	RP11-148O21.6,rs11250150,3.57E-13	RP11-148O21.6,rs5889367,5.88E-20,Cells_Transformed_fibroblasts	r2(rs11250150,rs5889367)=0.174	AF131215.9,rs11250150,2.00E-12	AF131215.9,rs11778398,2.26E-30,Lung	r2(rs11250150,rs11778398)=0.165	8	11589128	rs11250150	G	A	0.38	0.45	0.03	0.58				9 tissues	4 tissues					57 hits	7.8kb 3' of LINC00208	7.8kb 3' of NCRNA00208
303	rs11250151	11446680	LINC00208	8	11589171	LINC00208	1.202e-20	5	RP11-148O21.4(Cells_Transformed_fibroblasts,4.52E-17);RP11-148O21.3(Cells_Transformed_fibroblasts,7.03E-15);RP11-148O21.6(Cells_Transformed_fibroblasts,3.42E-14);AF131215.9(Thyroid,6.69E-14);AF131215.2(Esophagus_Mucosa,7.94E-14);RP11-481A20.10(Brain_Cerebellum,1.55E-13);FAM66A(Brain_Caudate_basal_ganglia,6.61E-13);AF131215.9(Esophagus_Mucosa,1.82E-12);RP11-148O21.2(Cells_Transformed_fibroblasts,3…	RP11-148O21.4,rs11250151,4.52E-17	RP11-148O21.4,rs5889367,2.72E-18,Cells_Transformed_fibroblasts	r2(rs11250151,rs5889367)=0.175	RP11-148O21.3,rs11250151,7.03E-15	RP11-148O21.3,rs5889367,2.67E-20,Cells_Transformed_fibroblasts	r2(rs11250151,rs5889367)=0.175	RP11-148O21.6,rs11250151,3.42E-14	RP11-148O21.6,rs5889367,5.88E-20,Cells_Transformed_fibroblasts	r2(rs11250151,rs5889367)=0.175	AF131215.9,rs11250151,6.69E-14	AF131215.9,rs11778398,2.26E-30,Lung	r2(rs11250151,rs11778398)=0.166	AF131215.2,rs11250151,7.94E-14	AF131215.2,rs36089015,3.07E-31,Skin_Sun_Exposed_Lower_leg	r2(rs11250151,rs36089015)=0.169	8	11589171	rs11250151	T	C	0.38	0.45	0.03	0.58				9 tissues	6 tissues		5 altered motifs			63 hits	7.8kb 3' of LINC00208	7.8kb 3' of NCRNA00208
304	rs11774572	11446800	LINC00208	8	11589291	LINC00208	6.31e-21	5	RP11-148O21.4(Cells_Transformed_fibroblasts,1.90E-16);RP11-148O21.3(Cells_Transformed_fibroblasts,2.43E-14);FAM66A(Brain_Caudate_basal_ganglia,2.72E-14);RP11-481A20.10(Brain_Cerebellum,3.95E-14);AF131215.9(Thyroid,7.94E-14);RP11-148O21.6(Cells_Transformed_fibroblasts,1.82E-13);AF131215.2(Esophagus_Mucosa,6.66E-13);AF131215.9(Esophagus_Mucosa,4.68E-12);RP11-481A20.11(Brain_Cerebellum,2.69E-11);FDF…	RP11-148O21.4,rs11774572,1.90E-16	RP11-148O21.4,rs5889367,2.72E-18,Cells_Transformed_fibroblasts	r2(rs11774572,rs5889367)=0.173	RP11-148O21.3,rs11774572,2.43E-14	RP11-148O21.3,rs5889367,2.67E-20,Cells_Transformed_fibroblasts	r2(rs11774572,rs5889367)=0.173	FAM66A,rs11774572,2.72E-14	FAM66A,rs2739967,1.88E-21,Skin_Sun_Exposed_Lower_leg	r2(rs11774572,rs2739967)=0	RP11-481A20.10,rs11774572,3.95E-14	RP11-481A20.10,rs6601641,1.94E-29,Brain_Cerebellum	r2(rs11774572,rs6601641)=0.128	AF131215.9,rs11774572,7.94E-14	AF131215.9,rs11778398,2.26E-30,Lung	r2(rs11774572,rs11778398)=0.166	8	11589291	rs11774572	C	T	0.38	0.45	0.03	0.58				9 tissues	7 tissues					61 hits	7.9kb 3' of LINC00208	7.9kb 3' of NCRNA00208
305	rs11778830	11446868	LINC00208	8	11589359	LINC00208	5.248e-21	5	RP11-148O21.4(Cells_Transformed_fibroblasts,3.09E-16);RP11-148O21.3(Cells_Transformed_fibroblasts,2.65E-14);FAM66A(Brain_Caudate_basal_ganglia,2.72E-14);RP11-481A20.10(Brain_Cerebellum,3.95E-14);AF131215.9(Thyroid,7.94E-14);RP11-148O21.6(Cells_Transformed_fibroblasts,2.36E-13);AF131215.2(Esophagus_Mucosa,2.24E-12);AF131215.9(Esophagus_Mucosa,7.59E-12);RP11-481A20.11(Brain_Cerebellum,2.69E-11);FDF…	RP11-148O21.4,rs11778830,3.09E-16	RP11-148O21.4,rs5889367,2.72E-18,Cells_Transformed_fibroblasts	r2(rs11778830,rs5889367)=0.175	RP11-148O21.3,rs11778830,2.65E-14	RP11-148O21.3,rs5889367,2.67E-20,Cells_Transformed_fibroblasts	r2(rs11778830,rs5889367)=0.175	FAM66A,rs11778830,2.72E-14	FAM66A,rs2739967,1.88E-21,Skin_Sun_Exposed_Lower_leg	r2(rs11778830,rs2739967)=0	RP11-481A20.10,rs11778830,3.95E-14	RP11-481A20.10,rs6601641,1.94E-29,Brain_Cerebellum	r2(rs11778830,rs6601641)=0.131	AF131215.9,rs11778830,7.94E-14	AF131215.9,rs11778398,2.26E-30,Lung	r2(rs11778830,rs11778398)=0.167	8	11589359	rs11778830	T	C	0.38	0.45	0.03	0.58			4 tissues	12 tissues	14 tissues		5 altered motifs			61 hits	8kb 3' of LINC00208	8kb 3' of NCRNA00208
306	rs17153498	11446955	LINC00208	8	11589446	LINC00208	4.677e-21	4	RP11-148O21.4(Cells_Transformed_fibroblasts,1.63E-16);RP11-481A20.10(Brain_Cerebellum,9.28E-15);FAM66A(Brain_Caudate_basal_ganglia,2.16E-14);RP11-148O21.3(Cells_Transformed_fibroblasts,2.58E-14);AF131215.9(Thyroid,7.94E-14);RP11-148O21.6(Cells_Transformed_fibroblasts,1.97E-13);AF131215.2(Esophagus_Mucosa,6.66E-13);AF131215.9(Esophagus_Mucosa,4.68E-12);RP11-481A20.11(Brain_Cerebellum,1.03E-11);RP1…	RP11-148O21.4,rs17153498,1.63E-16	RP11-148O21.4,rs5889367,2.72E-18,Cells_Transformed_fibroblasts	r2(rs17153498,rs5889367)=0.171	RP11-481A20.10,rs17153498,9.28E-15	RP11-481A20.10,rs6601641,1.94E-29,Brain_Cerebellum	r2(rs17153498,rs6601641)=0.134	FAM66A,rs17153498,2.16E-14	FAM66A,rs2739967,1.88E-21,Skin_Sun_Exposed_Lower_leg	r2(rs17153498,rs2739967)=0	RP11-148O21.3,rs17153498,2.58E-14	RP11-148O21.3,rs5889367,2.67E-20,Cells_Transformed_fibroblasts	r2(rs17153498,rs5889367)=0.171	AF131215.9,rs17153498,7.94E-14	AF131215.9,rs11778398,2.26E-30,Lung	r2(rs17153498,rs11778398)=0.171	8	11589446	rs17153498	G	A	0.37	0.45	0.03	0.58			4 tissues	12 tissues	27 tissues					57 hits	8.1kb 3' of LINC00208	8.1kb 3' of NCRNA00208
307	rs55896564	11447093	LINC00208	8	11589584	LINC00208	3.02e-21	2b	RP11-148O21.4(Cells_Transformed_fibroblasts,5.52E-18);AF131215.2(Skin_Sun_Exposed_Lower_leg,2.04E-16);RP11-481A20.10(Brain_Cerebellum,2.06E-16);AF131215.9(Esophagus_Mucosa,2.24E-16);AF131215.2(Esophagus_Mucosa,7.78E-16);AF131215.9(Thyroid,1.15E-15);RP11-481A20.11(Brain_Cerebellar_Hemisphere,1.78E-15);RP11-148O21.6(Cells_Transformed_fibroblasts,2.06E-15);FAM66A(Brain_Caudate_basal_ganglia,2.36E-15…	RP11-148O21.4,rs55896564,5.52E-18	RP11-148O21.4,rs5889367,2.72E-18,Cells_Transformed_fibroblasts	r2(rs55896564,rs5889367)=0.158	AF131215.2,rs55896564,2.04E-16	AF131215.2,rs36089015,3.07E-31,Skin_Sun_Exposed_Lower_leg	r2(rs55896564,rs36089015)=0.229	RP11-481A20.10,rs55896564,2.06E-16	RP11-481A20.10,rs6601641,1.94E-29,Brain_Cerebellum	r2(rs55896564,rs6601641)=0.146	AF131215.9,rs55896564,2.24E-16	AF131215.9,rs11778398,2.26E-30,Lung	r2(rs55896564,rs11778398)=0.215	RP11-481A20.11,rs55896564,1.78E-15	RP11-481A20.11,rs6601658,1.14E-26,Pancreas	r2(rs55896564,rs6601658)=0.018	8	11589584	rs55896564	G	A	0.26	0.41	0.01	0.55			ESC, MUS, LIV	14 tissues	45 tissues	9 bound proteins	Pax-2,RREB-1,Znf143			90 hits	8.2kb 3' of LINC00208	8.2kb 3' of NCRNA00208
308	rs56051089	11447119	LINC00208	8	11589610	LINC00208	8.511e-21	4	RP11-148O21.4(Cells_Transformed_fibroblasts,1.18E-16);RP11-148O21.3(Cells_Transformed_fibroblasts,1.19E-14);FAM66A(Brain_Caudate_basal_ganglia,2.72E-14);RP11-481A20.10(Brain_Cerebellum,3.95E-14);AF131215.9(Thyroid,7.94E-14);RP11-148O21.6(Cells_Transformed_fibroblasts,9.48E-14);AF131215.2(Esophagus_Mucosa,6.66E-13);AF131215.9(Esophagus_Mucosa,4.68E-12);RP11-481A20.11(Brain_Cerebellar_Hemisphere,1.…	RP11-148O21.4,rs56051089,1.18E-16	RP11-148O21.4,rs5889367,2.72E-18,Cells_Transformed_fibroblasts	r2(rs56051089,rs5889367)=0.174	RP11-148O21.3,rs56051089,1.19E-14	RP11-148O21.3,rs5889367,2.67E-20,Cells_Transformed_fibroblasts	r2(rs56051089,rs5889367)=0.174	FAM66A,rs56051089,2.72E-14	FAM66A,rs2739967,1.88E-21,Skin_Sun_Exposed_Lower_leg	r2(rs56051089,rs2739967)=0	RP11-481A20.10,rs56051089,3.95E-14	RP11-481A20.10,rs6601641,1.94E-29,Brain_Cerebellum	r2(rs56051089,rs6601641)=0.128	AF131215.9,rs56051089,7.94E-14	AF131215.9,rs11778398,2.26E-30,Lung	r2(rs56051089,rs11778398)=0.167	8	11589610	rs56051089	C	T	0.38	0.45	0.03	0.58			ESC, MUS, LIV	14 tissues	49 tissues	9 bound proteins	Nanog			57 hits	8.3kb 3' of LINC00208	8.3kb 3' of NCRNA00208
309	rs7823651	11447679	LINC00208	8	11590170	LINC00208	1.905e-19	5	RP11-148O21.4(Cells_Transformed_fibroblasts,7.43E-18);RP11-148O21.3(Cells_Transformed_fibroblasts,3.95E-16);RP11-148O21.6(Cells_Transformed_fibroblasts,2.02E-15);AF131215.2(Esophagus_Mucosa,5.68E-15);AF131215.9(Thyroid,6.39E-14);AF131215.9(Esophagus_Mucosa,7.03E-14);RP11-481A20.10(Brain_Cerebellum,1.86E-12);AF131215.9(Lung,3.46E-12);FAM66A(Brain_Caudate_basal_ganglia,5.05E-12);RP11-148O21.2(Cells…	RP11-148O21.4,rs7823651,7.43E-18	RP11-148O21.4,rs5889367,2.72E-18,Cells_Transformed_fibroblasts	r2(rs7823651,rs5889367)=0.259	RP11-148O21.3,rs7823651,3.95E-16	RP11-148O21.3,rs5889367,2.67E-20,Cells_Transformed_fibroblasts	r2(rs7823651,rs5889367)=0.259	RP11-148O21.6,rs7823651,2.02E-15	RP11-148O21.6,rs5889367,5.88E-20,Cells_Transformed_fibroblasts	r2(rs7823651,rs5889367)=0.259	AF131215.2,rs7823651,5.68E-15	AF131215.2,rs36089015,3.07E-31,Skin_Sun_Exposed_Lower_leg	r2(rs7823651,rs36089015)=0.135	AF131215.9,rs7823651,6.39E-14	AF131215.9,rs11778398,2.26E-30,Lung	r2(rs7823651,rs11778398)=0.145	8	11590170	rs7823651	G	C	0.68	0.46	0.03	0.59			LIV	5 tissues	SKIN,HRT		6 altered motifs			61 hits	8.8kb 3' of LINC00208	8.8kb 3' of NCRNA00208
310	rs1478891	11448328	LINC00208	8	11590819	LINC00208	3.802e-19	4	RP11-148O21.3(Cells_Transformed_fibroblasts,2.16E-14);RP11-148O21.6(Cells_Transformed_fibroblasts,2.11E-13);RP11-148O21.4(Cells_Transformed_fibroblasts,4.26E-12);RP11-148O21.2(Cells_Transformed_fibroblasts,3.10E-11);AF131215.9(Esophagus_Mucosa,2.91E-10);AF131215.2(Esophagus_Mucosa,6.40E-10);AF131215.9(Thyroid,1.23E-09);FDFT1(Artery_Tibial,1.59E-09);FAM167A(Skin_Sun_Exposed_Lower_leg,2.34E-09);FAM…	RP11-148O21.3,rs1478891,2.16E-14	RP11-148O21.3,rs5889367,2.67E-20,Cells_Transformed_fibroblasts	r2(rs1478891,rs5889367)=0.28	RP11-148O21.6,rs1478891,2.11E-13	RP11-148O21.6,rs5889367,5.88E-20,Cells_Transformed_fibroblasts	r2(rs1478891,rs5889367)=0.28	RP11-148O21.4,rs1478891,4.26E-12	RP11-148O21.4,rs5889367,2.72E-18,Cells_Transformed_fibroblasts	r2(rs1478891,rs5889367)=0.28	RP11-148O21.2,rs1478891,3.10E-11	RP11-148O21.2,rs5889367,5.75E-16,Cells_Transformed_fibroblasts	r2(rs1478891,rs5889367)=0.28	AF131215.9,rs1478891,2.91E-10	AF131215.9,rs11778398,2.26E-30,Lung	r2(rs1478891,rs11778398)=0.129	8	11590819	rs1478891	G	C	0.18	0.45	0.94	0.35				LIV, HRT, SPLN	BLD,HRT	CEBPB				48 hits	9.5kb 3' of LINC00208	9.5kb 3' of NCRNA00208
311	rs1478892	11448529	LINC00208	8	11591020	LINC00208	1.479e-19	4	RP11-148O21.3(Cells_Transformed_fibroblasts,1.75E-16);RP11-148O21.4(Cells_Transformed_fibroblasts,1.92E-15);RP11-148O21.6(Cells_Transformed_fibroblasts,3.16E-14);RP11-148O21.2(Cells_Transformed_fibroblasts,1.70E-12);AF131215.9(Esophagus_Mucosa,6.94E-11);AF131215.2(Esophagus_Mucosa,1.93E-10);FDFT1(Artery_Tibial,2.62E-10);FAM167A(Skin_Sun_Exposed_Lower_leg,7.65E-10);FAM66A(Brain_Cerebellar_Hemisphe…	RP11-148O21.3,rs1478892,1.75E-16	RP11-148O21.3,rs5889367,2.67E-20,Cells_Transformed_fibroblasts	r2(rs1478892,rs5889367)=0.28	RP11-148O21.4,rs1478892,1.92E-15	RP11-148O21.4,rs5889367,2.72E-18,Cells_Transformed_fibroblasts	r2(rs1478892,rs5889367)=0.28	RP11-148O21.6,rs1478892,3.16E-14	RP11-148O21.6,rs5889367,5.88E-20,Cells_Transformed_fibroblasts	r2(rs1478892,rs5889367)=0.28	RP11-148O21.2,rs1478892,1.70E-12	RP11-148O21.2,rs5889367,5.75E-16,Cells_Transformed_fibroblasts	r2(rs1478892,rs5889367)=0.28	AF131215.9,rs1478892,6.94E-11	AF131215.9,rs11778398,2.26E-30,Lung	r2(rs1478892,rs11778398)=0.133	8	11591020	rs1478892	G	T	0.18	0.45	0.94	0.35				HRT, SPLN, LIV		CEBPB	VDR,p300			53 hits	9.7kb 3' of LINC00208	9.7kb 3' of NCRNA00208
312	rs2244894	11448659	LINC00208	8	11591150	LINC00208	3.715e-19	5	AF131215.9(Esophagus_Mucosa,5.82E-14);RP11-148O21.4(Cells_Transformed_fibroblasts,7.56E-14);RP11-148O21.6(Cells_Transformed_fibroblasts,8.44E-14);RP11-148O21.3(Cells_Transformed_fibroblasts,2.85E-13);AF131215.2(Esophagus_Mucosa,3.81E-12);AF131215.2(Skin_Sun_Exposed_Lower_leg,5.74E-12);RP11-481A20.11(Brain_Cerebellar_Hemisphere,9.95E-12);AF131215.2(Skin_Not_Sun_Exposed_Suprapubic,2.09E-11);FAM66A(…	AF131215.9,rs2244894,5.82E-14	AF131215.9,rs11778398,2.26E-30,Lung	r2(rs2244894,rs11778398)=0.199	RP11-148O21.4,rs2244894,7.56E-14	RP11-148O21.4,rs5889367,2.72E-18,Cells_Transformed_fibroblasts	r2(rs2244894,rs5889367)=0.131	RP11-148O21.6,rs2244894,8.44E-14	RP11-148O21.6,rs5889367,5.88E-20,Cells_Transformed_fibroblasts	r2(rs2244894,rs5889367)=0.131	RP11-148O21.3,rs2244894,2.85E-13	RP11-148O21.3,rs5889367,2.67E-20,Cells_Transformed_fibroblasts	r2(rs2244894,rs5889367)=0.131	AF131215.2,rs2244894,3.81E-12	AF131215.2,rs36089015,3.07E-31,Skin_Sun_Exposed_Lower_leg	r2(rs2244894,rs36089015)=0.202	8	11591150	rs2244894	G	C	0.21	0.48	0.04	0.61				HRT, SPLN, LIV	HRT		NF-kappaB,Pou2f2			63 hits	9.8kb 3' of LINC00208	9.8kb 3' of NCRNA00208
313	rs1478894	11448754	LINC00208	8	11591245	LINC00208	2.512e-19	5	RP11-148O21.3(Cells_Transformed_fibroblasts,8.29E-15);RP11-148O21.4(Cells_Transformed_fibroblasts,3.16E-14);RP11-148O21.6(Cells_Transformed_fibroblasts,2.21E-13);RP11-148O21.2(Cells_Transformed_fibroblasts,4.27E-12);FDFT1(Artery_Tibial,7.49E-11);AF131215.9(Esophagus_Mucosa,2.13E-10);AF131215.2(Skin_Sun_Exposed_Lower_leg,6.78E-09);RP11-481A20.11(Brain_Cerebellar_Hemisphere,8.77E-09);AF131215.2(Ski…	RP11-148O21.3,rs1478894,8.29E-15	RP11-148O21.3,rs5889367,2.67E-20,Cells_Transformed_fibroblasts	r2(rs1478894,rs5889367)=0.157	RP11-148O21.4,rs1478894,3.16E-14	RP11-148O21.4,rs5889367,2.72E-18,Cells_Transformed_fibroblasts	r2(rs1478894,rs5889367)=0.157	RP11-148O21.6,rs1478894,2.21E-13	RP11-148O21.6,rs5889367,5.88E-20,Cells_Transformed_fibroblasts	r2(rs1478894,rs5889367)=0.157	RP11-148O21.2,rs1478894,4.27E-12	RP11-148O21.2,rs5889367,5.75E-16,Cells_Transformed_fibroblasts	r2(rs1478894,rs5889367)=0.157	FDFT1,rs1478894,7.49E-11	FDFT1,rs796427599,1.44E-37,Artery_Tibial	r2(rs1478894,rs796427599)=NA	8	11591245	rs1478894	C	T	0.54	0.48	0.94	0.36				HRT, SPLN, LIV			4 altered motifs			40 hits	9.9kb 3' of LINC00208	9.9kb 3' of NCRNA00208
314	rs13274269	11449325	LINC00208	8	11591816	LINC00208	5.37e-18	5	RP11-148O21.3(Cells_Transformed_fibroblasts,1.96E-14);RP11-148O21.4(Cells_Transformed_fibroblasts,7.64E-14);RP11-148O21.6(Cells_Transformed_fibroblasts,1.13E-13);AF131215.9(Esophagus_Mucosa,6.58E-11);RP11-148O21.2(Cells_Transformed_fibroblasts,7.59E-11);FDFT1(Artery_Tibial,1.37E-09);AF131215.9(Skin_Not_Sun_Exposed_Suprapubic,6.42E-09);FAM66A(Brain_Cerebellar_Hemisphere,7.37E-09);AF131215.2(Esopha…	RP11-148O21.3,rs13274269,1.96E-14	RP11-148O21.3,rs5889367,2.67E-20,Cells_Transformed_fibroblasts	r2(rs13274269,rs5889367)=0.297	RP11-148O21.4,rs13274269,7.64E-14	RP11-148O21.4,rs5889367,2.72E-18,Cells_Transformed_fibroblasts	r2(rs13274269,rs5889367)=0.297	RP11-148O21.6,rs13274269,1.13E-13	RP11-148O21.6,rs5889367,5.88E-20,Cells_Transformed_fibroblasts	r2(rs13274269,rs5889367)=0.297	AF131215.9,rs13274269,6.58E-11	AF131215.9,rs11778398,2.26E-30,Lung	r2(rs13274269,rs11778398)=0.131	RP11-148O21.2,rs13274269,7.59E-11	RP11-148O21.2,rs5889367,5.75E-16,Cells_Transformed_fibroblasts	r2(rs13274269,rs5889367)=0.297	8	11591816	rs13274269	G	T	0.12	0.47	0.95	0.35			LIV	4 tissues	HRT		FXR,VDR			53 hits	10kb 3' of LINC00208	10kb 3' of NCRNA00208
315	rs11995206	11450133	LINC00208	8	11592624	LINC00208	2.818e-21	5	RP11-148O21.3(Cells_Transformed_fibroblasts,8.11E-16);RP11-148O21.6(Cells_Transformed_fibroblasts,3.07E-15);RP11-148O21.4(Cells_Transformed_fibroblasts,6.25E-15);AF131215.9(Thyroid,2.84E-14);AF131215.9(Esophagus_Mucosa,3.48E-14);AF131215.2(Esophagus_Mucosa,4.43E-14);FAM66A(Brain_Caudate_basal_ganglia,4.60E-13);AF131215.2(Skin_Sun_Exposed_Lower_leg,5.22E-13);AF131215.2(Nerve_Tibial,1.67E-11);RP11-…	RP11-148O21.3,rs11995206,8.11E-16	RP11-148O21.3,rs5889367,2.67E-20,Cells_Transformed_fibroblasts	r2(rs11995206,rs5889367)=0.243	RP11-148O21.6,rs11995206,3.07E-15	RP11-148O21.6,rs5889367,5.88E-20,Cells_Transformed_fibroblasts	r2(rs11995206,rs5889367)=0.243	RP11-148O21.4,rs11995206,6.25E-15	RP11-148O21.4,rs5889367,2.72E-18,Cells_Transformed_fibroblasts	r2(rs11995206,rs5889367)=0.243	AF131215.9,rs11995206,2.84E-14	AF131215.9,rs11778398,2.26E-30,Lung	r2(rs11995206,rs11778398)=0.176	AF131215.2,rs11995206,4.43E-14	AF131215.2,rs36089015,3.07E-31,Skin_Sun_Exposed_Lower_leg	r2(rs11995206,rs36089015)=0.141	8	11592624	rs11995206	G	A	0.3	0.55	0.98	0.41				5 tissues	IPSC,LIV		5 altered motifs			76 hits	11kb 3' of LINC00208	11kb 3' of NCRNA00208
316	rs34163377	11450213	LINC00208	8	11592704	LINC00208	1.905e-19	5	RP11-148O21.3(Cells_Transformed_fibroblasts,6.04E-17);RP11-148O21.6(Cells_Transformed_fibroblasts,2.90E-16);RP11-148O21.4(Cells_Transformed_fibroblasts,1.19E-15);RP11-148O21.2(Cells_Transformed_fibroblasts,3.37E-12);AF131215.2(Skin_Sun_Exposed_Lower_leg,3.87E-10);AF131215.9(Thyroid,7.42E-10);FDFT1(Artery_Tibial,9.04E-10);AF131215.9(Esophagus_Mucosa,9.20E-10);AF131215.9(Skin_Not_Sun_Exposed_Suprap…	RP11-148O21.3,rs34163377,6.04E-17	RP11-148O21.3,rs5889367,2.67E-20,Cells_Transformed_fibroblasts	r2(rs34163377,rs5889367)=0.278	RP11-148O21.6,rs34163377,2.90E-16	RP11-148O21.6,rs5889367,5.88E-20,Cells_Transformed_fibroblasts	r2(rs34163377,rs5889367)=0.278	RP11-148O21.4,rs34163377,1.19E-15	RP11-148O21.4,rs5889367,2.72E-18,Cells_Transformed_fibroblasts	r2(rs34163377,rs5889367)=0.278	RP11-148O21.2,rs34163377,3.37E-12	RP11-148O21.2,rs5889367,5.75E-16,Cells_Transformed_fibroblasts	r2(rs34163377,rs5889367)=0.278	AF131215.2,rs34163377,3.87E-10	AF131215.2,rs36089015,3.07E-31,Skin_Sun_Exposed_Lower_leg	r2(rs34163377,rs36089015)=0.111	8	11592704	rs34163377	C	G	0.17	0.47	0.93	0.35				6 tissues	LIV		5 altered motifs			49 hits	11kb 3' of LINC00208	11kb 3' of NCRNA00208
317	rs2244648	11450422	LINC00208	8	11592913	LINC00208	1.738e-21	5	RP11-148O21.4(Cells_Transformed_fibroblasts,2.93E-18);AF131215.2(Skin_Sun_Exposed_Lower_leg,5.66E-18);AF131215.9(Esophagus_Mucosa,7.11E-17);AF131215.2(Nerve_Tibial,8.51E-16);AF131215.2(Esophagus_Mucosa,1.46E-15);FAM66A(Brain_Caudate_basal_ganglia,2.31E-15);RP11-481A20.10(Brain_Cerebellum,2.79E-15);RP11-148O21.6(Cells_Transformed_fibroblasts,4.25E-15);AF131215.9(Thyroid,7.71E-15);AF131215.9(Lung,1…	RP11-148O21.4,rs2244648,2.93E-18	RP11-148O21.4,rs5889367,2.72E-18,Cells_Transformed_fibroblasts	r2(rs2244648,rs5889367)=0.151	AF131215.2,rs2244648,5.66E-18	AF131215.2,rs36089015,3.07E-31,Skin_Sun_Exposed_Lower_leg	r2(rs2244648,rs36089015)=0.239	AF131215.9,rs2244648,7.11E-17	AF131215.9,rs11778398,2.26E-30,Lung	r2(rs2244648,rs11778398)=0.248	FAM66A,rs2244648,2.31E-15	FAM66A,rs2739967,1.88E-21,Skin_Sun_Exposed_Lower_leg	r2(rs2244648,rs2739967)=0.001	RP11-481A20.10,rs2244648,2.79E-15	RP11-481A20.10,rs6601641,1.94E-29,Brain_Cerebellum	r2(rs2244648,rs6601641)=0.169	8	11592913	rs2244648	A	G	0.79	0.59	0.99	0.45				5 tissues	OVRY,LIV		5 altered motifs			94 hits	12kb 3' of LINC00208	12kb 3' of NCRNA00208
318	rs35005793	11450472	LINC00208	8	11592963	LINC00208	1.82e-19	5	RP11-148O21.3(Cells_Transformed_fibroblasts,9.91E-17);RP11-148O21.4(Cells_Transformed_fibroblasts,1.39E-15);RP11-148O21.6(Cells_Transformed_fibroblasts,2.30E-15);RP11-148O21.2(Cells_Transformed_fibroblasts,1.10E-12);AF131215.9(Esophagus_Mucosa,1.91E-10);AF131215.2(Skin_Sun_Exposed_Lower_leg,3.75E-10);AF131215.9(Thyroid,7.89E-10);FAM167A(Skin_Sun_Exposed_Lower_leg,1.05E-09);AF131215.9(Skin_Not_Sun…	RP11-148O21.3,rs35005793,9.91E-17	RP11-148O21.3,rs5889367,2.67E-20,Cells_Transformed_fibroblasts	r2(rs35005793,rs5889367)=0.299	RP11-148O21.4,rs35005793,1.39E-15	RP11-148O21.4,rs5889367,2.72E-18,Cells_Transformed_fibroblasts	r2(rs35005793,rs5889367)=0.299	RP11-148O21.6,rs35005793,2.30E-15	RP11-148O21.6,rs5889367,5.88E-20,Cells_Transformed_fibroblasts	r2(rs35005793,rs5889367)=0.299	RP11-148O21.2,rs35005793,1.10E-12	RP11-148O21.2,rs5889367,5.75E-16,Cells_Transformed_fibroblasts	r2(rs35005793,rs5889367)=0.299	AF131215.9,rs35005793,1.91E-10	AF131215.9,rs11778398,2.26E-30,Lung	r2(rs35005793,rs11778398)=0.135	8	11592963	rs35005793	G	A	0.13	0.47	0.93	0.35				5 tissues	HRT,OVRY,MUS		Pax-6			48 hits	12kb 3' of LINC00208	12kb 3' of NCRNA00208
319	rs10903340	11450587	LINC00208	8	11593078	LINC00208	5.888e-21	5	RP11-148O21.3(Cells_Transformed_fibroblasts,7.40E-17);RP11-148O21.4(Cells_Transformed_fibroblasts,3.80E-16);RP11-148O21.6(Cells_Transformed_fibroblasts,1.74E-15);AF131215.2(Esophagus_Mucosa,4.22E-14);AF131215.9(Thyroid,4.72E-14);AF131215.9(Esophagus_Mucosa,6.26E-14);FAM66A(Brain_Caudate_basal_ganglia,7.32E-13);AF131215.2(Skin_Sun_Exposed_Lower_leg,2.00E-12);AF131215.9(Lung,5.70E-12);AF131215.2(Pa…	RP11-148O21.3,rs10903340,7.40E-17	RP11-148O21.3,rs5889367,2.67E-20,Cells_Transformed_fibroblasts	r2(rs10903340,rs5889367)=0.217	RP11-148O21.4,rs10903340,3.80E-16	RP11-148O21.4,rs5889367,2.72E-18,Cells_Transformed_fibroblasts	r2(rs10903340,rs5889367)=0.217	RP11-148O21.6,rs10903340,1.74E-15	RP11-148O21.6,rs5889367,5.88E-20,Cells_Transformed_fibroblasts	r2(rs10903340,rs5889367)=0.217	AF131215.2,rs10903340,4.22E-14	AF131215.2,rs36089015,3.07E-31,Skin_Sun_Exposed_Lower_leg	r2(rs10903340,rs36089015)=0.145	AF131215.9,rs10903340,4.72E-14	AF131215.9,rs11778398,2.26E-30,Lung	r2(rs10903340,rs11778398)=0.175	8	11593078	rs10903340	T	G	0.34	0.56	0.98	0.41					IPSC,HRT,OVRY		Zfx		10 hits	76 hits	12kb 3' of LINC00208	12kb 3' of NCRNA00208
320	rs12677146	11450737	LINC00208	8	11593228	LINC00208	1.096e-19	1f	RP11-148O21.3(Cells_Transformed_fibroblasts,6.04E-17);RP11-148O21.6(Cells_Transformed_fibroblasts,2.90E-16);RP11-148O21.4(Cells_Transformed_fibroblasts,1.19E-15);RP11-148O21.2(Cells_Transformed_fibroblasts,3.37E-12);AF131215.2(Skin_Sun_Exposed_Lower_leg,3.87E-10);AF131215.9(Thyroid,7.42E-10);FDFT1(Artery_Tibial,9.04E-10);AF131215.9(Esophagus_Mucosa,9.20E-10);AF131215.9(Skin_Not_Sun_Exposed_Suprap…	RP11-148O21.3,rs12677146,6.04E-17	RP11-148O21.3,rs5889367,2.67E-20,Cells_Transformed_fibroblasts	r2(rs12677146,rs5889367)=0.281	RP11-148O21.6,rs12677146,2.90E-16	RP11-148O21.6,rs5889367,5.88E-20,Cells_Transformed_fibroblasts	r2(rs12677146,rs5889367)=0.281	RP11-148O21.4,rs12677146,1.19E-15	RP11-148O21.4,rs5889367,2.72E-18,Cells_Transformed_fibroblasts	r2(rs12677146,rs5889367)=0.281	RP11-148O21.2,rs12677146,3.37E-12	RP11-148O21.2,rs5889367,5.75E-16,Cells_Transformed_fibroblasts	r2(rs12677146,rs5889367)=0.281	AF131215.2,rs12677146,3.87E-10	AF131215.2,rs36089015,3.07E-31,Skin_Sun_Exposed_Lower_leg	r2(rs12677146,rs36089015)=0.111	8	11593228	rs12677146	C	G	0.17	0.46	0.94	0.35				8 tissues	HRT,OVRY,MUS		HNF1,Irf		4 hits	53 hits	12kb 3' of LINC00208	12kb 3' of NCRNA00208
321	rs4841569	11452177	LINC00208	8	11594668	LINC00208	5.754e-19	5	RP11-148O21.4(Cells_Transformed_fibroblasts,3.51E-10);RP11-481A20.10(Brain_Cerebellum,7.33E-10);AF131215.2(Skin_Sun_Exposed_Lower_leg,1.16E-09);RP11-148O21.3(Cells_Transformed_fibroblasts,1.45E-09);RP11-148O21.6(Cells_Transformed_fibroblasts,1.80E-09);FAM66A(Pituitary,1.88E-09);AF131215.9(Thyroid,3.46E-09);FAM66A(Brain_Caudate_basal_ganglia,5.50E-09);AF131215.2(Esophagus_Mucosa,3.87E-08);RP11-481…	RP11-148O21.4,rs4841569,3.51E-10	RP11-148O21.4,rs5889367,2.72E-18,Cells_Transformed_fibroblasts	r2(rs4841569,rs5889367)=0.094	RP11-481A20.10,rs4841569,7.33E-10	RP11-481A20.10,rs6601641,1.94E-29,Brain_Cerebellum	r2(rs4841569,rs6601641)=0.11	AF131215.2,rs4841569,1.16E-09	AF131215.2,rs36089015,3.07E-31,Skin_Sun_Exposed_Lower_leg	r2(rs4841569,rs36089015)=0.188	RP11-148O21.3,rs4841569,1.45E-09	RP11-148O21.3,rs5889367,2.67E-20,Cells_Transformed_fibroblasts	r2(rs4841569,rs5889367)=0.094	RP11-148O21.6,rs4841569,1.80E-09	RP11-148O21.6,rs5889367,5.88E-20,Cells_Transformed_fibroblasts	r2(rs4841569,rs5889367)=0.094	8	11594668	rs4841569	G	A	0.11	0.37	0	0.42				12 tissues	8 tissues		Zfp410			36 hits	13kb 3' of LINC00208	13kb 3' of NCRNA00208
322	rs13277929	11453030	LINC00208	8	11595521	LINC00208	4.467e-15	6	RP11-148O21.3(Cells_Transformed_fibroblasts,4.44E-14);RP11-148O21.4(Cells_Transformed_fibroblasts,5.04E-14);RP11-148O21.6(Cells_Transformed_fibroblasts,1.76E-12);RP11-148O21.2(Cells_Transformed_fibroblasts,3.22E-10);FDFT1(Artery_Tibial,2.00E-09);AF131215.2(Skin_Sun_Exposed_Lower_leg,1.39E-08)	RP11-148O21.3,rs13277929,4.44E-14	RP11-148O21.3,rs5889367,2.67E-20,Cells_Transformed_fibroblasts	r2(rs13277929,rs5889367)=0.236	RP11-148O21.4,rs13277929,5.04E-14	RP11-148O21.4,rs5889367,2.72E-18,Cells_Transformed_fibroblasts	r2(rs13277929,rs5889367)=0.236	RP11-148O21.6,rs13277929,1.76E-12	RP11-148O21.6,rs5889367,5.88E-20,Cells_Transformed_fibroblasts	r2(rs13277929,rs5889367)=0.236	RP11-148O21.2,rs13277929,3.22E-10	RP11-148O21.2,rs5889367,5.75E-16,Cells_Transformed_fibroblasts	r2(rs13277929,rs5889367)=0.236	FDFT1,rs13277929,2.00E-09	FDFT1,rs796427599,1.44E-37,Artery_Tibial	r2(rs13277929,rs796427599)=NA	8	11595521	rs13277929	G	A	0.14	0.48	0.92	0.41				5 tissues			6 altered motifs			33 hits	14kb 3' of LINC00208	14kb 3' of NCRNA00208
323	rs7815172	11453671	LINC00208	8	11596162	LINC00208	1.202e-14	6	RP11-148O21.3(Cells_Transformed_fibroblasts,4.38E-14);RP11-148O21.4(Cells_Transformed_fibroblasts,5.00E-13);RP11-148O21.6(Cells_Transformed_fibroblasts,2.13E-12);FDFT1(Artery_Tibial,3.08E-10);RP11-148O21.2(Cells_Transformed_fibroblasts,2.52E-09);AF131215.2(Skin_Not_Sun_Exposed_Suprapubic,1.42E-08);AF131215.2(Skin_Sun_Exposed_Lower_leg,1.51E-08)	RP11-148O21.3,rs7815172,4.38E-14	RP11-148O21.3,rs5889367,2.67E-20,Cells_Transformed_fibroblasts	r2(rs7815172,rs5889367)=0.208	RP11-148O21.4,rs7815172,5.00E-13	RP11-148O21.4,rs5889367,2.72E-18,Cells_Transformed_fibroblasts	r2(rs7815172,rs5889367)=0.208	RP11-148O21.6,rs7815172,2.13E-12	RP11-148O21.6,rs5889367,5.88E-20,Cells_Transformed_fibroblasts	r2(rs7815172,rs5889367)=0.208	FDFT1,rs7815172,3.08E-10	FDFT1,rs796427599,1.44E-37,Artery_Tibial	r2(rs7815172,rs796427599)=NA	RP11-148O21.2,rs7815172,2.52E-09	RP11-148O21.2,rs5889367,5.75E-16,Cells_Transformed_fibroblasts	r2(rs7815172,rs5889367)=0.208	8	11596162	rs7815172	T	C	0.26	0.5	0.93	0.41				HRT, OVRY			GR			29 hits	15kb 3' of LINC00208	15kb 3' of NCRNA00208
324	rs35986297	11454015	LINC00208	8	11596506	LINC00208	4.365e-21	7	AF131215.2(Skin_Sun_Exposed_Lower_leg,1.60E-12);RP11-148O21.4(Cells_Transformed_fibroblasts,1.17E-11);RP11-148O21.3(Cells_Transformed_fibroblasts,3.36E-11);AF131215.9(Esophagus_Mucosa,3.65E-11);RP11-148O21.6(Cells_Transformed_fibroblasts,4.01E-11);AF131215.9(Thyroid,4.73E-11);AF131215.2(Esophagus_Mucosa,1.05E-10);AF131215.9(Nerve_Tibial,3.02E-09);AF131215.2(Nerve_Tibial,3.15E-09);RP11-481A20.10(B…	AF131215.2,rs35986297,1.60E-12	AF131215.2,rs36089015,3.07E-31,Skin_Sun_Exposed_Lower_leg	r2(rs35986297,rs36089015)=0.202	RP11-148O21.4,rs35986297,1.17E-11	RP11-148O21.4,rs5889367,2.72E-18,Cells_Transformed_fibroblasts	r2(rs35986297,rs5889367)=0.1	RP11-148O21.3,rs35986297,3.36E-11	RP11-148O21.3,rs5889367,2.67E-20,Cells_Transformed_fibroblasts	r2(rs35986297,rs5889367)=0.1	AF131215.9,rs35986297,3.65E-11	AF131215.9,rs11778398,2.26E-30,Lung	r2(rs35986297,rs11778398)=0.188	RP11-148O21.6,rs35986297,4.01E-11	RP11-148O21.6,rs5889367,5.88E-20,Cells_Transformed_fibroblasts	r2(rs35986297,rs5889367)=0.1	8	11596506	rs35986297	C	T	0.12	0.32	0	0.41				OVRY, PANC						40 hits	15kb 3' of LINC00208	15kb 3' of NCRNA00208
325	rs11250152	11454200	LINC00208	8	11596691	LINC00208	1.622e-14	6	RP11-148O21.3(Cells_Transformed_fibroblasts,6.53E-13);RP11-148O21.4(Cells_Transformed_fibroblasts,7.89E-13);RP11-148O21.6(Cells_Transformed_fibroblasts,1.70E-11);FDFT1(Artery_Tibial,2.71E-10);RP11-148O21.2(Cells_Transformed_fibroblasts,1.52E-09);AF131215.2(Skin_Sun_Exposed_Lower_leg,3.17E-08);AF131215.2(Skin_Not_Sun_Exposed_Suprapubic,5.31E-08)	RP11-148O21.3,rs11250152,6.53E-13	RP11-148O21.3,rs5889367,2.67E-20,Cells_Transformed_fibroblasts	r2(rs11250152,rs5889367)=0.237	RP11-148O21.4,rs11250152,7.89E-13	RP11-148O21.4,rs5889367,2.72E-18,Cells_Transformed_fibroblasts	r2(rs11250152,rs5889367)=0.237	RP11-148O21.6,rs11250152,1.70E-11	RP11-148O21.6,rs5889367,5.88E-20,Cells_Transformed_fibroblasts	r2(rs11250152,rs5889367)=0.237	FDFT1,rs11250152,2.71E-10	FDFT1,rs796427599,1.44E-37,Artery_Tibial	r2(rs11250152,rs796427599)=NA	RP11-148O21.2,rs11250152,1.52E-09	RP11-148O21.2,rs5889367,5.75E-16,Cells_Transformed_fibroblasts	r2(rs11250152,rs5889367)=0.237	8	11596691	rs11250152	G	T	0.19	0.5	0.92	0.41				OVRY, PANC	OVRY		EBF		3 hits	26 hits	15kb 3' of LINC00208	15kb 3' of NCRNA00208
326	rs11777273	11455106	LINC00208	8	11597597	LINC00208	3.02e-21	1f	AF131215.2(Skin_Sun_Exposed_Lower_leg,1.60E-12);RP11-148O21.4(Cells_Transformed_fibroblasts,1.17E-11);RP11-148O21.3(Cells_Transformed_fibroblasts,3.36E-11);AF131215.9(Esophagus_Mucosa,3.65E-11);RP11-148O21.6(Cells_Transformed_fibroblasts,4.01E-11);AF131215.9(Thyroid,4.73E-11);AF131215.2(Esophagus_Mucosa,1.05E-10);AF131215.9(Nerve_Tibial,3.02E-09);AF131215.2(Nerve_Tibial,3.15E-09);RP11-481A20.10(B…	AF131215.2,rs11777273,1.60E-12	AF131215.2,rs36089015,3.07E-31,Skin_Sun_Exposed_Lower_leg	r2(rs11777273,rs36089015)=0.205	RP11-148O21.4,rs11777273,1.17E-11	RP11-148O21.4,rs5889367,2.72E-18,Cells_Transformed_fibroblasts	r2(rs11777273,rs5889367)=0.102	RP11-148O21.3,rs11777273,3.36E-11	RP11-148O21.3,rs5889367,2.67E-20,Cells_Transformed_fibroblasts	r2(rs11777273,rs5889367)=0.102	AF131215.9,rs11777273,3.65E-11	AF131215.9,rs11778398,2.26E-30,Lung	r2(rs11777273,rs11778398)=0.193	RP11-148O21.6,rs11777273,4.01E-11	RP11-148O21.6,rs5889367,5.88E-20,Cells_Transformed_fibroblasts	r2(rs11777273,rs5889367)=0.102	8	11597597	rs11777273	C	T	0.11	0.32	0	0.41				7 tissues	4 tissues		EBF,RXRA			46 hits	16kb 3' of LINC00208	16kb 3' of NCRNA00208
327	rs34876360	11455262	LINC00208	8	11597753	LINC00208	6.607e-20	4	RP11-148O21.3(Cells_Transformed_fibroblasts,5.00E-17);RP11-148O21.4(Cells_Transformed_fibroblasts,7.23E-17);RP11-148O21.6(Cells_Transformed_fibroblasts,1.82E-15);RP11-148O21.2(Cells_Transformed_fibroblasts,1.10E-12);FAM66A(Brain_Cerebellar_Hemisphere,3.51E-10);FAM66A(Brain_Caudate_basal_ganglia,4.51E-10);AF131215.9(Esophagus_Mucosa,2.04E-09);FAM167A(Skin_Sun_Exposed_Lower_leg,3.53E-09);AF131215.2…	RP11-148O21.3,rs34876360,5.00E-17	RP11-148O21.3,rs5889367,2.67E-20,Cells_Transformed_fibroblasts	r2(rs34876360,rs5889367)=0.265	RP11-148O21.4,rs34876360,7.23E-17	RP11-148O21.4,rs5889367,2.72E-18,Cells_Transformed_fibroblasts	r2(rs34876360,rs5889367)=0.265	RP11-148O21.6,rs34876360,1.82E-15	RP11-148O21.6,rs5889367,5.88E-20,Cells_Transformed_fibroblasts	r2(rs34876360,rs5889367)=0.265	RP11-148O21.2,rs34876360,1.10E-12	RP11-148O21.2,rs5889367,5.75E-16,Cells_Transformed_fibroblasts	r2(rs34876360,rs5889367)=0.265	FAM66A,rs34876360,3.51E-10	FAM66A,rs2739967,1.88E-21,Skin_Sun_Exposed_Lower_leg	r2(rs34876360,rs2739967)=0	8	11597753	rs34876360	G	A	0.11	0.45	0.88	0.33				6 tissues	4 tissues	HNF4A	ERalpha-a,Esr2,LF-A1			42 hits	16kb 3' of LINC00208	16kb 3' of NCRNA00208
328	rs12155794	11455950	LINC00208	8	11598441	LINC00208	3.388e-21	7	AF131215.2(Skin_Sun_Exposed_Lower_leg,1.17E-12);RP11-148O21.4(Cells_Transformed_fibroblasts,2.58E-11);AF131215.2(Esophagus_Mucosa,9.29E-11);AF131215.9(Esophagus_Mucosa,9.49E-11);RP11-148O21.3(Cells_Transformed_fibroblasts,1.02E-10);AF131215.9(Thyroid,1.61E-10);RP11-148O21.6(Cells_Transformed_fibroblasts,2.96E-10);AF131215.2(Nerve_Tibial,2.12E-09);AF131215.9(Nerve_Tibial,2.36E-09);FAM66A(Brain_Cau…	AF131215.2,rs12155794,1.17E-12	AF131215.2,rs36089015,3.07E-31,Skin_Sun_Exposed_Lower_leg	r2(rs12155794,rs36089015)=0.194	RP11-148O21.4,rs12155794,2.58E-11	RP11-148O21.4,rs5889367,2.72E-18,Cells_Transformed_fibroblasts	r2(rs12155794,rs5889367)=0.095	AF131215.9,rs12155794,9.49E-11	AF131215.9,rs11778398,2.26E-30,Lung	r2(rs12155794,rs11778398)=0.182	RP11-148O21.3,rs12155794,1.02E-10	RP11-148O21.3,rs5889367,2.67E-20,Cells_Transformed_fibroblasts	r2(rs12155794,rs5889367)=0.095	RP11-148O21.6,rs12155794,2.96E-10	RP11-148O21.6,rs5889367,5.88E-20,Cells_Transformed_fibroblasts	r2(rs12155794,rs5889367)=0.095	8	11598441	rs12155794	C	T	0.13	0.34	0.01	0.4				4 tissues			LUN-1,Nkx2			38 hits	17kb 3' of LINC00208	17kb 3' of NCRNA00208
329	rs35373084	11457248	LINC00208	8	11599739	LINC00208	3.311e-17	5	AF131215.2(Skin_Sun_Exposed_Lower_leg,7.01E-18);AF131215.2(Esophagus_Mucosa,1.16E-13);AF131215.9(Esophagus_Mucosa,2.12E-13);AF131215.9(Skin_Sun_Exposed_Lower_leg,9.75E-13);AF131215.9(Thyroid,3.16E-12);RP11-148O21.4(Cells_Transformed_fibroblasts,6.62E-12);AF131215.9(Nerve_Tibial,1.59E-11);RP11-148O21.6(Cells_Transformed_fibroblasts,1.64E-11);RP11-148O21.3(Cells_Transformed_fibroblasts,3.05E-11);AF…	AF131215.2,rs35373084,7.01E-18	AF131215.2,rs36089015,3.07E-31,Skin_Sun_Exposed_Lower_leg	r2(rs35373084,rs36089015)=0.133	AF131215.9,rs35373084,2.12E-13	AF131215.9,rs11778398,2.26E-30,Lung	r2(rs35373084,rs11778398)=0.155	RP11-148O21.4,rs35373084,6.62E-12	RP11-148O21.4,rs5889367,2.72E-18,Cells_Transformed_fibroblasts	r2(rs35373084,rs5889367)=0.181	RP11-148O21.6,rs35373084,1.64E-11	RP11-148O21.6,rs5889367,5.88E-20,Cells_Transformed_fibroblasts	r2(rs35373084,rs5889367)=0.181	RP11-148O21.3,rs35373084,3.05E-11	RP11-148O21.3,rs5889367,2.67E-20,Cells_Transformed_fibroblasts	r2(rs35373084,rs5889367)=0.181	8	11599739	rs35373084	T	C	0.36	0.59	0.99	0.51				BRN, PANC, MUS	BRN		10 altered motifs			58 hits	18kb 3' of LINC00208	18kb 3' of NCRNA00208
330	rs13249843	11459018	LINC00208	8	11601509	LINC00208	1.202e-19	5	RP11-148O21.4(Cells_Transformed_fibroblasts,2.04E-17);RP11-148O21.3(Cells_Transformed_fibroblasts,2.74E-17);RP11-148O21.6(Cells_Transformed_fibroblasts,3.24E-15);RP11-148O21.2(Cells_Transformed_fibroblasts,3.02E-13);AF131215.9(Esophagus_Mucosa,5.77E-12);AF131215.2(Esophagus_Mucosa,1.21E-11);FDFT1(Artery_Tibial,1.36E-10);FAM66A(Brain_Cerebellar_Hemisphere,4.27E-10);AF131215.2(Skin_Sun_Exposed_Lowe…	RP11-148O21.4,rs13249843,2.04E-17	RP11-148O21.4,rs5889367,2.72E-18,Cells_Transformed_fibroblasts	r2(rs13249843,rs5889367)=0.268	RP11-148O21.3,rs13249843,2.74E-17	RP11-148O21.3,rs5889367,2.67E-20,Cells_Transformed_fibroblasts	r2(rs13249843,rs5889367)=0.268	RP11-148O21.6,rs13249843,3.24E-15	RP11-148O21.6,rs5889367,5.88E-20,Cells_Transformed_fibroblasts	r2(rs13249843,rs5889367)=0.268	RP11-148O21.2,rs13249843,3.02E-13	RP11-148O21.2,rs5889367,5.75E-16,Cells_Transformed_fibroblasts	r2(rs13249843,rs5889367)=0.268	AF131215.9,rs13249843,5.77E-12	AF131215.9,rs11778398,2.26E-30,Lung	r2(rs13249843,rs11778398)=0.124	8	11601509	rs13249843	G	T	0.15	0.46	0.92	0.34				BRN, OVRY, LIV	4 tissues		7 altered motifs			47 hits	20kb 3' of LINC00208	20kb 3' of NCRNA00208
331	rs13273172	11461111	LINC00208	8	11603602	LINC00208	6.457e-25	6	AF131215.9(Esophagus_Mucosa,4.08E-15);AF131215.9(Thyroid,1.05E-13);AF131215.2(Esophagus_Mucosa,2.02E-13);RP11-148O21.4(Cells_Transformed_fibroblasts,3.00E-13);AF131215.2(Skin_Sun_Exposed_Lower_leg,4.18E-13);FAM66A(Brain_Caudate_basal_ganglia,9.58E-13);AF131215.2(Nerve_Tibial,2.71E-12);RP11-148O21.3(Cells_Transformed_fibroblasts,5.04E-12);RP11-481A20.10(Brain_Cerebellum,1.34E-11);RP11-148O21.6(Cel…	AF131215.9,rs13273172,4.08E-15	AF131215.9,rs11778398,2.26E-30,Lung	r2(rs13273172,rs11778398)=0.222	AF131215.2,rs13273172,2.02E-13	AF131215.2,rs36089015,3.07E-31,Skin_Sun_Exposed_Lower_leg	r2(rs13273172,rs36089015)=0.236	RP11-148O21.4,rs13273172,3.00E-13	RP11-148O21.4,rs5889367,2.72E-18,Cells_Transformed_fibroblasts	r2(rs13273172,rs5889367)=0.121	FAM66A,rs13273172,9.58E-13	FAM66A,rs2739967,1.88E-21,Skin_Sun_Exposed_Lower_leg	r2(rs13273172,rs2739967)=0.002	RP11-148O21.3,rs13273172,5.04E-12	RP11-148O21.3,rs5889367,2.67E-20,Cells_Transformed_fibroblasts	r2(rs13273172,rs5889367)=0.121	8	11603602	rs13273172	A	G	0.12	0.35	0.01	0.47				ESDR			6 altered motifs			69 hits	22kb 3' of LINC00208	22kb 3' of NCRNA00208
332	rs13248109	11462517	LINC00208	8	11605008	LINC00208	8.511e-21	7	AF131215.2(Skin_Sun_Exposed_Lower_leg,1.10E-12);AF131215.9(Esophagus_Mucosa,4.67E-11);AF131215.9(Thyroid,4.86E-11);AF131215.2(Esophagus_Mucosa,1.20E-10);RP11-148O21.3(Cells_Transformed_fibroblasts,3.08E-10);AF131215.2(Nerve_Tibial,3.65E-10);RP11-148O21.4(Cells_Transformed_fibroblasts,4.20E-10);RP11-148O21.6(Cells_Transformed_fibroblasts,8.78E-10);AF131215.9(Nerve_Tibial,1.13E-09);RP11-481A20.10(B…	AF131215.2,rs13248109,1.10E-12	AF131215.2,rs36089015,3.07E-31,Skin_Sun_Exposed_Lower_leg	r2(rs13248109,rs36089015)=0.199	AF131215.9,rs13248109,4.67E-11	AF131215.9,rs11778398,2.26E-30,Lung	r2(rs13248109,rs11778398)=0.184	RP11-148O21.3,rs13248109,3.08E-10	RP11-148O21.3,rs5889367,2.67E-20,Cells_Transformed_fibroblasts	r2(rs13248109,rs5889367)=0.098	RP11-148O21.4,rs13248109,4.20E-10	RP11-148O21.4,rs5889367,2.72E-18,Cells_Transformed_fibroblasts	r2(rs13248109,rs5889367)=0.098	RP11-148O21.6,rs13248109,8.78E-10	RP11-148O21.6,rs5889367,5.88E-20,Cells_Transformed_fibroblasts	r2(rs13248109,rs5889367)=0.098	8	11605008	rs13248109	C	A	0.11	0.32	0.01	0.41							Dmbx1,THAP1			44 hits	24kb 3' of LINC00208	24kb 3' of NCRNA00208
333	rs17807624	11463015	LINC00208	8	11605506	LINC00208	6.607e-19	6	RP11-148O21.4(Cells_Transformed_fibroblasts,1.54E-17);RP11-148O21.3(Cells_Transformed_fibroblasts,4.63E-17);RP11-148O21.6(Cells_Transformed_fibroblasts,7.28E-15);RP11-148O21.2(Cells_Transformed_fibroblasts,5.14E-13);AF131215.9(Esophagus_Mucosa,1.45E-10);AF131215.2(Esophagus_Mucosa,4.06E-10);FAM66A(Brain_Cerebellar_Hemisphere,4.27E-10);AF131215.2(Skin_Sun_Exposed_Lower_leg,4.87E-10);AF131215.9(Thy…	RP11-148O21.4,rs17807624,1.54E-17	RP11-148O21.4,rs5889367,2.72E-18,Cells_Transformed_fibroblasts	r2(rs17807624,rs5889367)=0.279	RP11-148O21.3,rs17807624,4.63E-17	RP11-148O21.3,rs5889367,2.67E-20,Cells_Transformed_fibroblasts	r2(rs17807624,rs5889367)=0.279	RP11-148O21.6,rs17807624,7.28E-15	RP11-148O21.6,rs5889367,5.88E-20,Cells_Transformed_fibroblasts	r2(rs17807624,rs5889367)=0.279	RP11-148O21.2,rs17807624,5.14E-13	RP11-148O21.2,rs5889367,5.75E-16,Cells_Transformed_fibroblasts	r2(rs17807624,rs5889367)=0.279	AF131215.9,rs17807624,1.45E-10	AF131215.9,rs11778398,2.26E-30,Lung	r2(rs17807624,rs11778398)=0.126	8	11605506	rs17807624	C	T	0.15	0.48	0.92	0.35				LIV			4 altered motifs		3 hits	52 hits	24kb 3' of LINC00208	24kb 3' of NCRNA00208
334	rs4840573	11463230	LINC00208	8	11605721	LINC00208	2.239e-21	1f	AF131215.2(Skin_Sun_Exposed_Lower_leg,1.73E-11);RP11-148O21.4(Cells_Transformed_fibroblasts,7.82E-11);AF131215.9(Thyroid,1.08E-10);AF131215.9(Esophagus_Mucosa,1.35E-10);AF131215.2(Esophagus_Mucosa,1.95E-10);RP11-148O21.3(Cells_Transformed_fibroblasts,2.37E-10);RP11-148O21.6(Cells_Transformed_fibroblasts,5.29E-10);RP11-481A20.10(Brain_Cerebellum,1.70E-09);FDFT1(Artery_Tibial,1.17E-08);RP11-481A20.…	AF131215.2,rs4840573,1.73E-11	AF131215.2,rs36089015,3.07E-31,Skin_Sun_Exposed_Lower_leg	r2(rs4840573,rs36089015)=0.194	RP11-148O21.4,rs4840573,7.82E-11	RP11-148O21.4,rs5889367,2.72E-18,Cells_Transformed_fibroblasts	r2(rs4840573,rs5889367)=0.099	AF131215.9,rs4840573,1.08E-10	AF131215.9,rs11778398,2.26E-30,Lung	r2(rs4840573,rs11778398)=0.18	RP11-148O21.3,rs4840573,2.37E-10	RP11-148O21.3,rs5889367,2.67E-20,Cells_Transformed_fibroblasts	r2(rs4840573,rs5889367)=0.099	RP11-148O21.6,rs4840573,5.29E-10	RP11-148O21.6,rs5889367,5.88E-20,Cells_Transformed_fibroblasts	r2(rs4840573,rs5889367)=0.099	8	11605721	rs4840573	G	A	0.11	0.32	0.01	0.41				LIV	ESDR,BLD		4 altered motifs		2 hits	44 hits	24kb 3' of LINC00208	24kb 3' of NCRNA00208
335	rs13278965	11466745	LINC00208	8	11609236	LOC105379242	1.82e-24	6	AF131215.9(Esophagus_Mucosa,2.05E-14);FAM66A(Brain_Caudate_basal_ganglia,7.27E-14);AF131215.2(Esophagus_Mucosa,8.29E-14);RP11-148O21.4(Cells_Transformed_fibroblasts,1.25E-13);AF131215.9(Thyroid,1.49E-12);AF131215.2(Skin_Sun_Exposed_Lower_leg,2.49E-12);RP11-148O21.3(Cells_Transformed_fibroblasts,2.62E-12);RP11-481A20.10(Brain_Cerebellum,1.05E-11);RP11-148O21.6(Cells_Transformed_fibroblasts,2.20E-1…	AF131215.9,rs13278965,2.05E-14	AF131215.9,rs11778398,2.26E-30,Lung	r2(rs13278965,rs11778398)=0.212	FAM66A,rs13278965,7.27E-14	FAM66A,rs2739967,1.88E-21,Skin_Sun_Exposed_Lower_leg	r2(rs13278965,rs2739967)=0.002	AF131215.2,rs13278965,8.29E-14	AF131215.2,rs36089015,3.07E-31,Skin_Sun_Exposed_Lower_leg	r2(rs13278965,rs36089015)=0.226	RP11-148O21.4,rs13278965,1.25E-13	RP11-148O21.4,rs5889367,2.72E-18,Cells_Transformed_fibroblasts	r2(rs13278965,rs5889367)=0.117	RP11-148O21.3,rs13278965,2.62E-12	RP11-148O21.3,rs5889367,2.67E-20,Cells_Transformed_fibroblasts	r2(rs13278965,rs5889367)=0.117	8	11609236	rs13278965	A	T	0.12	0.35	0.01	0.46							Myc,Osr		2 hits	76 hits	28kb 3' of LINC00208	28kb 3' of NCRNA00208
336	rs13280442	11467557	LINC00208	8	11610048	LOC105379242	9.12e-24	6	AF131215.2(Esophagus_Mucosa,1.94E-15);AF131215.9(Thyroid,3.81E-15);RP11-148O21.4(Cells_Transformed_fibroblasts,5.68E-15);AF131215.9(Esophagus_Mucosa,9.77E-15);AF131215.2(Skin_Sun_Exposed_Lower_leg,5.59E-14);FAM66A(Brain_Caudate_basal_ganglia,7.88E-14);RP11-148O21.3(Cells_Transformed_fibroblasts,9.87E-14);RP11-148O21.6(Cells_Transformed_fibroblasts,6.45E-13);AF131215.2(Nerve_Tibial,1.04E-11);RP11-…	AF131215.2,rs13280442,1.94E-15	AF131215.2,rs36089015,3.07E-31,Skin_Sun_Exposed_Lower_leg	r2(rs13280442,rs36089015)=0.201	AF131215.9,rs13280442,3.81E-15	AF131215.9,rs11778398,2.26E-30,Lung	r2(rs13280442,rs11778398)=0.191	RP11-148O21.4,rs13280442,5.68E-15	RP11-148O21.4,rs5889367,2.72E-18,Cells_Transformed_fibroblasts	r2(rs13280442,rs5889367)=0.118	FAM66A,rs13280442,7.88E-14	FAM66A,rs2739967,1.88E-21,Skin_Sun_Exposed_Lower_leg	r2(rs13280442,rs2739967)=0.001	RP11-148O21.3,rs13280442,9.87E-14	RP11-148O21.3,rs5889367,2.67E-20,Cells_Transformed_fibroblasts	r2(rs13280442,rs5889367)=0.118	8	11610048	rs13280442	C	G	0.16	0.37	0.01	0.46							6 altered motifs			72 hits	29kb 3' of LINC00208	29kb 3' of NCRNA00208
337	rs13250871	11467763	LINC00208	8	11610254	LOC105379242	1.905e-23	7	AF131215.2(Skin_Sun_Exposed_Lower_leg,4.14E-12);RP11-148O21.4(Cells_Transformed_fibroblasts,3.48E-11);AF131215.9(Thyroid,4.34E-11);RP11-148O21.3(Cells_Transformed_fibroblasts,1.41E-10);AF131215.2(Esophagus_Mucosa,5.27E-10);FAM66A(Brain_Caudate_basal_ganglia,9.48E-10);AF131215.9(Esophagus_Mucosa,9.72E-10);RP11-148O21.6(Cells_Transformed_fibroblasts,1.12E-09);RP11-481A20.11(Brain_Cerebellum,3.83E-0…	AF131215.2,rs13250871,4.14E-12	AF131215.2,rs36089015,3.07E-31,Skin_Sun_Exposed_Lower_leg	r2(rs13250871,rs36089015)=0.192	RP11-148O21.4,rs13250871,3.48E-11	RP11-148O21.4,rs5889367,2.72E-18,Cells_Transformed_fibroblasts	r2(rs13250871,rs5889367)=0.1	AF131215.9,rs13250871,4.34E-11	AF131215.9,rs11778398,2.26E-30,Lung	r2(rs13250871,rs11778398)=0.181	RP11-148O21.3,rs13250871,1.41E-10	RP11-148O21.3,rs5889367,2.67E-20,Cells_Transformed_fibroblasts	r2(rs13250871,rs5889367)=0.1	FAM66A,rs13250871,9.48E-10	FAM66A,rs2739967,1.88E-21,Skin_Sun_Exposed_Lower_leg	r2(rs13250871,rs2739967)=0.001	8	11610254	rs13250871	G	A	0.09	0.31	0.01	0.41							Ets,NF-AT,SPIB			39 hits	29kb 3' of LINC00208	29kb 3' of NCRNA00208
338	rs3735814	11607396	GATA4	8	11749887	GATA4	2.138e-10	7	NEIL2(Nerve_Tibial,1.61E-18);FDFT1(Artery_Tibial,2.18E-11);NEIL2(Artery_Aorta,9.97E-11);NEIL2(Heart_Atrial_Appendage,1.55E-10);C8orf49(Heart_Atrial_Appendage,4.27E-10);NEIL2(Cells_Transformed_fibroblasts,1.25E-09);NEIL2(Whole_Blood,1.48E-09);C8orf49(Heart_Left_Ventricle,7.74E-09);NEIL2(Adipose_Subcutaneous,4.22E-08)	NEIL2,rs3735814,1.61E-18	NEIL2,rs804270,3.75E-37,Nerve_Tibial	r2(rs3735814,rs804270)=0.4	FDFT1,rs3735814,2.18E-11	FDFT1,rs796427599,1.44E-37,Artery_Tibial	r2(rs3735814,rs796427599)=NA	C8orf49,rs3735814,4.27E-10	C8orf49,rs36018280,7.60E-25,Testis	r2(rs3735814,rs36018280)=0.134							8	11749887	rs3735814	G	A	0.53	0.59	0.88	0.47				GI	HRT		RXRA		7 hits	26 hits	GATA4	GATA4	intronic
339	rs2645396	11608126	GATA4	8	11750617	GATA4	2.089e-10	5	C8orf49(Heart_Atrial_Appendage,1.76E-11);FDFT1(Artery_Tibial,4.11E-10);AF131215.9(Esophagus_Mucosa,1.55E-08)	C8orf49,rs2645396,1.76E-11	C8orf49,rs36018280,7.60E-25,Testis	r2(rs2645396,rs36018280)=0.146	FDFT1,rs2645396,4.11E-10	FDFT1,rs796427599,1.44E-37,Artery_Tibial	r2(rs2645396,rs796427599)=NA	AF131215.9,rs2645396,1.55E-08	AF131215.9,rs11778398,2.26E-30,Lung	r2(rs2645396,rs11778398)=0.071							8	11750617	rs2645396	C	A	0.94	0.77	0.98	0.7				GI	ESDR,SKIN,BRST		Hoxa9,Irx,Lhx3			16 hits	GATA4	GATA4	intronic
340	rs36038176	11609995	GATA4	8	11752486	GATA4	3.236e-10	5	C8orf49(Heart_Atrial_Appendage,4.31E-11);FDFT1(Artery_Tibial,2.46E-10);AF131215.2(Lung,1.76E-08);AF131215.9(Esophagus_Mucosa,2.63E-08);AF131215.9(Lung,4.49E-08)	C8orf49,rs36038176,4.31E-11	C8orf49,rs36018280,7.60E-25,Testis	r2(rs36038176,rs36018280)=0.178	FDFT1,rs36038176,2.46E-10	FDFT1,rs796427599,1.44E-37,Artery_Tibial	r2(rs36038176,rs796427599)=NA	AF131215.2,rs36038176,1.76E-08	AF131215.2,rs36089015,3.07E-31,Skin_Sun_Exposed_Lower_leg	r2(rs36038176,rs36089015)=0.114	AF131215.9,rs36038176,2.63E-08	AF131215.9,rs11778398,2.26E-30,Lung	r2(rs36038176,rs11778398)=0.093				8	11752486	rs36038176	C	T	0.02	0.23	0.02	0.3				ESDR	ESDR					12 hits	GATA4	GATA4	intronic
	B. Novel SNVs/Genes from Correlated Meta-Analysis
Nb	SNV	Chr138	HUGO 138 (hg19)	Chr150 (hg38)	Position 150 (hg38)	HUGO 150 (hg38)	P-Value for Stage 1 and Stage 2	RegulomeDB_score	Target Gene(s) (Tissue, P-Value)	Target Gene 1, eSNV regulating it	Best eSNV within Target Gene 1	r2 between 2 eSNVs (LD1)	Target Gene 2, eSNV regulating it	Best eSNV within Target Gene 2	r2 between 2 eSNVs (LD2)	Target Gene 3, eSNV regulating it	Best eSNV within Target Gene 3	r2 between 2 eSNVs (LD3)	Target Gene 4, eSNV regulating it	Best eSNV within Target Gene 4	r2 between 2 eSNVs (LD4)	Target Gene 5, eSNV regulating it	Best eSNV within Target Gene 5	r2 between 2 eSNVs (LD5)	Chr	Position (hg38)	Variant	Ref	Alt	AFR	AMR	ASN	EUR	GERP	SiPhy	Promoter	Enhancer	DNAse	Proteins	Motifs	NHGRI/EBI	GRASP QTL	Selected eQTL	GENCODE	RefSeq	dbSNP
																														freq	freq	freq	freq	cons	cons	histone marks	histone marks		bound	changed	GWAS hits	hits	hits	genes	genes	func annot
1	rs2980755	8363683	SGK223	8	8506173	LOC107986913	4.59387e-09	7	FAM86B3P(Cells_Transformed_fibroblasts,2.63E-36);FAM86B3P(Esophagus_Mucosa,2.80E-35);SGK223(Thyroid,6.50E-35);CTA-398F10.2(Skin_Sun_Exposed_Lower_leg,5.55E-32);CTA-398F10.2(Skin_Not_Sun_Exposed_Suprapubic,2.26E-25);ALG1L13P(Cells_Transformed_fibroblasts,1.07E-24);FAM85B(Testis,3.31E-22);ERI1(Cells_Transformed_fibroblasts,8.34E-18);FAM86B3P(Adipose_Visceral_Omentum,8.42E-18);ALG1L13P(Esophagus_Muc…	FAM86B3P,rs2980755,2.63E-36	FAM86B3P,rs2980439,1.26E-80,Cells_Transformed_fibroblasts	r2(rs2980755,rs2980439)=0.242	SGK223,rs2980755,6.50E-35	SGK223,rs2921053,1.04E-67,Thyroid	r2(rs2980755,rs2921053)=0.297	CTA-398F10.2,rs2980755,5.55E-32	CTA-398F10.2,rs2921057,2.76E-53,Skin_Sun_Exposed_Lower_leg	r2(rs2980755,rs2921057)=0.271	ALG1L13P,rs2980755,1.07E-24	ALG1L13P,rs2980439,1.65E-46,Cells_Transformed_fibroblasts	r2(rs2980755,rs2980439)=0.242	FAM85B,rs2980755,3.31E-22	FAM85B,rs2955581,2.15E-50,Testis	r2(rs2980755,rs2955581)=0.266	8	8506173	rs2980755	A	G	0.46	0.47	0.67	0.47				IPSC			4 altered motifs			27 hits	45kb 5' of CTA-398F10.2	124kb 5' of SGK223
2	rs13270194	8378102	SGK223	8	8520592	LOC105379224	1.5941e-09	7	SGK223(Thyroid,2.42E-37);FAM86B3P(Cells_Transformed_fibroblasts,1.34E-32);CTA-398F10.2(Skin_Not_Sun_Exposed_Suprapubic,9.34E-30);CTA-398F10.2(Skin_Sun_Exposed_Lower_leg,1.73E-29);FAM86B3P(Esophagus_Mucosa,1.75E-29);FAM85B(Testis,2.12E-26);ERI1(Cells_Transformed_fibroblasts,5.90E-22);ALG1L13P(Cells_Transformed_fibroblasts,1.39E-20);FAM86B3P(Adipose_Visceral_Omentum,9.39E-18);FAM85B(Nerve_Tibial,2.…	SGK223,rs13270194,2.42E-37	SGK223,rs2921053,1.04E-67,Thyroid	r2(rs13270194,rs2921053)=0.439	FAM86B3P,rs13270194,1.34E-32	FAM86B3P,rs2980439,1.26E-80,Cells_Transformed_fibroblasts	r2(rs13270194,rs2980439)=0.275	CTA-398F10.2,rs13270194,9.34E-30	CTA-398F10.2,rs2921057,2.76E-53,Skin_Sun_Exposed_Lower_leg	r2(rs13270194,rs2921057)=0.531	FAM85B,rs13270194,2.12E-26	FAM85B,rs2955581,2.15E-50,Testis	r2(rs13270194,rs2955581)=0.291	ERI1,rs13270194,5.90E-22	ERI1,rs2979256,1.19E-53,Cells_Transformed_fibroblasts	r2(rs13270194,rs2979256)=0.146	8	8520592	rs13270194	T	C	0.63	0.61	0.88	0.49				BRST, BLD, SKIN	BLD,LNG		Pax-4,SREBP,Zic			23 hits	35kb 3' of CTD-3023L14.3	139kb 5' of SGK223
3	rs1976671	9679634	TNKS	8	9822124	TNKS	2.01415e-09	6	ERI1(Cells_Transformed_fibroblasts,1.03E-09)	ERI1,rs1976671,1.03E-09	ERI1,rs2979256,1.19E-53,Cells_Transformed_fibroblasts	r2(rs1976671,rs2979256)=0.052													8	9822124	rs1976671	A	G	0.42	0.41	0.53	0.36							21 altered motifs			2 hits	40kb 3' of TNKS	40kb 3' of TNKS
4	rs483916	9793601	MIR124-1	8	9936091	MIR124-1	1.54728e-11	7	RP11-62H7.2(Thyroid,4.66E-13);ERI1(Cells_Transformed_fibroblasts,3.58E-12);RP11-115J16.2(Testis,1.60E-08)	RP11-62H7.2,rs483916,4.66E-13	RP11-62H7.2,rs6994163,4.50E-30,Thyroid	r2(rs483916,rs6994163)=0.151	ERI1,rs483916,3.58E-12	ERI1,rs2979256,1.19E-53,Cells_Transformed_fibroblasts	r2(rs483916,rs2979256)=0.217	RP11-115J16.2,rs483916,1.60E-08	RP11-115J16.2,rs898797,5.12E-24,Testis	r2(rs483916,rs898797)=0.266							8	9936091	rs483916	A	C	0.6	0.42	0.03	0.56							NF-I,STAT			5 hits	4.3kb 5' of snoU13	33kb 5' of MIR124-1
5	rs615632	9796321	MIR124-1	8	9938811	MIR124-1	4.17501e-10	5	ERI1(Cells_Transformed_fibroblasts,5.04E-14);RP11-62H7.2(Thyroid,3.80E-11);RP11-115J16.2(Testis,2.33E-09)	ERI1,rs615632,5.04E-14	ERI1,rs2979256,1.19E-53,Cells_Transformed_fibroblasts	r2(rs615632,rs2979256)=0.253	RP11-62H7.2,rs615632,3.80E-11	RP11-62H7.2,rs6994163,4.50E-30,Thyroid	r2(rs615632,rs6994163)=0.16	RP11-115J16.2,rs615632,2.33E-09	RP11-115J16.2,rs898797,5.12E-24,Testis	r2(rs615632,rs898797)=0.275							8	9938811	rs615632	C	T	0.72	0.42	0.04	0.56							CCNT2,TAL1			3 hits	7kb 5' of snoU13	35kb 5' of MIR124-1
6	rs7843924	9976540	MSRA	8	10119030	MSRA	2.45638e-13	6	AF131215.9(Esophagus_Mucosa,2.97E-12);AF131215.2(Esophagus_Mucosa,2.56E-10);AF131215.9(Lung,2.00E-08);AF131215.9(Skin_Not_Sun_Exposed_Suprapubic,2.27E-08);AF131215.9(Nerve_Tibial,3.18E-08);AF131215.9(Heart_Atrial_Appendage,4.03E-08);AF131215.2(Skin_Sun_Exposed_Lower_leg,4.39E-08);AF131215.2(Nerve_Tibial,8.55E-08)	AF131215.9,rs7843924,2.97E-12	AF131215.9,rs11778398,2.26E-30,Lung	r2(rs7843924,rs11778398)=0.142	AF131215.2,rs7843924,2.56E-10	AF131215.2,rs36089015,3.07E-31,Skin_Sun_Exposed_Lower_leg	r2(rs7843924,rs36089015)=0.116										8	10119030	rs7843924	C	T	0.43	0.59	0.95	0.42							13 altered motifs			6 hits	MSRA	MSRA	intronic
7	rs2062331	9979992	MSRA	8	10122482	MSRA	5.48702e-13	6	AF131215.9(Esophagus_Mucosa,1.82E-12);AF131215.2(Esophagus_Mucosa,5.13E-09);AF131215.9(Lung,4.84E-08);AF131215.9(Thyroid,6.17E-08);AF131215.9(Heart_Atrial_Appendage,6.53E-08);RP11-10A14.5(Testis,9.37E-08)	AF131215.9,rs2062331,1.82E-12	AF131215.9,rs11778398,2.26E-30,Lung	r2(rs2062331,rs11778398)=0.14	AF131215.2,rs2062331,5.13E-09	AF131215.2,rs36089015,3.07E-31,Skin_Sun_Exposed_Lower_leg	r2(rs2062331,rs36089015)=0.119	RP11-10A14.5,rs2062331,9.37E-08	RP11-10A14.5,rs3748136,2.61E-59,Whole_Blood	r2(rs2062331,rs3748136)=0.008							8	10122482	rs2062331	A	G	0.46	0.59	0.95	0.42							Nkx2,Nkx3,TEF-1		2 hits	5 hits	MSRA	MSRA	intronic
8	rs10096777	10518500	RP1L1	8	10660990	RP1L1	7.58335e-09	3a	AF131215.9(Esophagus_Mucosa,1.44E-16);AF131215.9(Skin_Not_Sun_Exposed_Suprapubic,4.44E-13);AF131215.2(Esophagus_Mucosa,5.86E-13);RP11-148O21.6(Cells_Transformed_fibroblasts,5.28E-12);AF131215.2(Thyroid,6.59E-12);AF131215.9(Thyroid,1.17E-11);AF131215.2(Lung,3.53E-11);RP11-148O21.3(Cells_Transformed_fibroblasts,4.30E-11);RP11-148O21.4(Cells_Transformed_fibroblasts,9.10E-11);AF131215.9(Pancreas,1.69…	AF131215.9,rs10096777,1.44E-16	AF131215.9,rs11778398,2.26E-30,Lung	r2(rs10096777,rs11778398)=0.144	AF131215.2,rs10096777,5.86E-13	AF131215.2,rs36089015,3.07E-31,Skin_Sun_Exposed_Lower_leg	r2(rs10096777,rs36089015)=0.1	RP11-148O21.6,rs10096777,5.28E-12	RP11-148O21.6,rs5889367,5.88E-20,Cells_Transformed_fibroblasts	r2(rs10096777,rs5889367)=0.202	RP11-148O21.3,rs10096777,4.30E-11	RP11-148O21.3,rs5889367,2.67E-20,Cells_Transformed_fibroblasts	r2(rs10096777,rs5889367)=0.202	RP11-148O21.4,rs10096777,9.10E-11	RP11-148O21.4,rs5889367,2.72E-18,Cells_Transformed_fibroblasts	r2(rs10096777,rs5889367)=0.202	8	10660990	rs10096777	G	A	0.89	0.53	0.1	0.56					MUS,BLD	CTCF	Foxm1,ZID			42 hits	RP1L1	5.9kb 5' of RP1L1
9	rs7814795	10519285	MIR4286	8	10661775	MIR4286	6.86242e-09	4	AF131215.9(Esophagus_Mucosa,7.65E-14);AF131215.9(Skin_Not_Sun_Exposed_Suprapubic,1.37E-12);AF131215.9(Thyroid,2.79E-12);AF131215.2(Thyroid,4.59E-11);AF131215.2(Lung,1.00E-10);AF131215.2(Esophagus_Mucosa,1.08E-10);RP11-148O21.6(Cells_Transformed_fibroblasts,3.52E-10);AF131215.2(Nerve_Tibial,4.16E-10);RP11-148O21.3(Cells_Transformed_fibroblasts,1.17E-09);AF131215.9(Lung,1.25E-09);AF131215.2(Skin_Su…	AF131215.9,rs7814795,7.65E-14	AF131215.9,rs11778398,2.26E-30,Lung	r2(rs7814795,rs11778398)=0.157	AF131215.2,rs7814795,4.59E-11	AF131215.2,rs36089015,3.07E-31,Skin_Sun_Exposed_Lower_leg	r2(rs7814795,rs36089015)=0.119	RP11-148O21.6,rs7814795,3.52E-10	RP11-148O21.6,rs5889367,5.88E-20,Cells_Transformed_fibroblasts	r2(rs7814795,rs5889367)=0.149	RP11-148O21.3,rs7814795,1.17E-09	RP11-148O21.3,rs5889367,2.67E-20,Cells_Transformed_fibroblasts	r2(rs7814795,rs5889367)=0.149	RP11-148O21.4,rs7814795,1.60E-08	RP11-148O21.4,rs5889367,2.72E-18,Cells_Transformed_fibroblasts	r2(rs7814795,rs5889367)=0.149	8	10661775	rs7814795	C	T	0.68	0.52	0.1	0.55				5 tissues		CJUN	4 altered motifs			39 hits	RP1L1	6.7kb 5' of RP1L1
10	rs11250099	10818657	XKR6	8	10961147	XKR6	4.12721e-08	1f	AF131215.2(Skin_Sun_Exposed_Lower_leg,1.18E-21);AF131215.9(Esophagus_Mucosa,1.61E-19);AF131215.9(Skin_Not_Sun_Exposed_Suprapubic,2.03E-18);AF131215.9(Skin_Sun_Exposed_Lower_leg,4.00E-18);AF131215.9(Lung,4.38E-18);AF131215.2(Lung,5.00E-17);AF131215.2(Nerve_Tibial,8.51E-17);AF131215.2(Skin_Not_Sun_Exposed_Suprapubic,1.27E-16);AF131215.9(Thyroid,4.08E-15);AF131215.2(Heart_Atrial_Appendage,7.30E-15);…	AF131215.2,rs11250099,1.18E-21	AF131215.2,rs36089015,3.07E-31,Skin_Sun_Exposed_Lower_leg	r2(rs11250099,rs36089015)=0.133	AF131215.9,rs11250099,1.61E-19	AF131215.9,rs11778398,2.26E-30,Lung	r2(rs11250099,rs11778398)=0.197	RP11-148O21.6,rs11250099,2.39E-12	RP11-148O21.6,rs5889367,5.88E-20,Cells_Transformed_fibroblasts	r2(rs11250099,rs5889367)=0.185	RP11-148O21.3,rs11250099,2.54E-12	RP11-148O21.3,rs5889367,2.67E-20,Cells_Transformed_fibroblasts	r2(rs11250099,rs5889367)=0.185	RP11-148O21.4,rs11250099,1.72E-11	RP11-148O21.4,rs5889367,2.72E-18,Cells_Transformed_fibroblasts	r2(rs11250099,rs5889367)=0.185	8	10961147	rs11250099	A	G	0.85	0.45	0.12	0.53				7 tissues		P300	Pax-5		5 hits	69 hits	XKR6	XKR6	intronic
11	rs12156009	11285219	C8orf12	8	11427710	FAM167A	9.49165e-09	7	AF131215.2(Skin_Sun_Exposed_Lower_leg,2.38E-09);FAM167A(Cells_Transformed_fibroblasts,2.57E-09);FAM66A(Brain_Caudate_basal_ganglia,3.06E-09);RP11-481A20.10(Brain_Cerebellar_Hemisphere,7.02E-09);AF131215.2(Esophagus_Mucosa,7.02E-09);AF131216.5(Stomach,1.37E-08);AF131215.2(Cells_EBV-transformed_lymphocytes,1.39E-08);RP11-481A20.11(Brain_Cerebellar_Hemisphere,1.73E-08);AF131215.9(Skin_Sun_Exposed_Lo…	AF131215.2,rs12156009,2.38E-09	AF131215.2,rs36089015,3.07E-31,Skin_Sun_Exposed_Lower_leg	r2(rs12156009,rs36089015)=0.128	FAM167A,rs12156009,2.57E-09	FAM167A,rs11777505,3.79E-53,Skin_Sun_Exposed_Lower_leg	r2(rs12156009,rs11777505)=0.211	FAM66A,rs12156009,3.06E-09	FAM66A,rs2739967,1.88E-21,Skin_Sun_Exposed_Lower_leg	r2(rs12156009,rs2739967)=0.001	RP11-481A20.10,rs12156009,7.02E-09	RP11-481A20.10,rs6601641,1.94E-29,Brain_Cerebellum	r2(rs12156009,rs6601641)=0.112	AF131216.5,rs12156009,1.37E-08	AF131216.5,rs56177149,3.22E-40,Pancreas	r2(rs12156009,rs56177149)=0.172	8	11427710	rs12156009	A	C	0.45	0.35	0.04	0.51			ESDR, ESC, IPSC	6 tissues			4 altered motifs			55 hits	FAM167A	FAM167A	intronic
12	rs13255193	11309192	FAM167A	8	11451683	FAM167A	2.40816e-08	3a	AF131215.9(Thyroid,2.57E-14);AF131215.2(Skin_Sun_Exposed_Lower_leg,4.35E-14);FAM167A(Skin_Sun_Exposed_Lower_leg,5.75E-14);AF131215.2(Esophagus_Mucosa,1.15E-13);AF131215.2(Nerve_Tibial,2.28E-13);AF131215.2(Thyroid,7.96E-13);RP11-481A20.10(Brain_Cerebellum,1.45E-12);RP11-148O21.3(Cells_Transformed_fibroblasts,2.40E-12);RP11-148O21.6(Cells_Transformed_fibroblasts,8.94E-12);AF131215.9(Skin_Sun_Expose…	AF131215.9,rs13255193,2.57E-14	AF131215.9,rs11778398,2.26E-30,Lung	r2(rs13255193,rs11778398)=0.183	AF131215.2,rs13255193,4.35E-14	AF131215.2,rs36089015,3.07E-31,Skin_Sun_Exposed_Lower_leg	r2(rs13255193,rs36089015)=0.165	FAM167A,rs13255193,5.75E-14	FAM167A,rs11777505,3.79E-53,Skin_Sun_Exposed_Lower_leg	r2(rs13255193,rs11777505)=0.325	RP11-481A20.10,rs13255193,1.45E-12	RP11-481A20.10,rs6601641,1.94E-29,Brain_Cerebellum	r2(rs13255193,rs6601641)=0.148	RP11-148O21.3,rs13255193,2.40E-12	RP11-148O21.3,rs5889367,2.67E-20,Cells_Transformed_fibroblasts	r2(rs13255193,rs5889367)=0.174	8	11451683	rs13255193	T	C	0.43	0.4	0.01	0.55				7 tissues	8 tissues	USF1,USF2,MAX	5 altered motifs			60 hits	FAM167A	FAM167A	intronic
13	rs1478894	11448754	LINC00208	8	11591245	LINC00208	3.69417e-10	5	RP11-148O21.3(Cells_Transformed_fibroblasts,8.29E-15);RP11-148O21.4(Cells_Transformed_fibroblasts,3.16E-14);RP11-148O21.6(Cells_Transformed_fibroblasts,2.21E-13);RP11-148O21.2(Cells_Transformed_fibroblasts,4.27E-12);FDFT1(Artery_Tibial,7.49E-11);AF131215.9(Esophagus_Mucosa,2.13E-10);AF131215.2(Skin_Sun_Exposed_Lower_leg,6.78E-09);RP11-481A20.11(Brain_Cerebellar_Hemisphere,8.77E-09);AF131215.2(Ski…	RP11-148O21.3,rs1478894,8.29E-15	RP11-148O21.3,rs5889367,2.67E-20,Cells_Transformed_fibroblasts	r2(rs1478894,rs5889367)=0.157	RP11-148O21.4,rs1478894,3.16E-14	RP11-148O21.4,rs5889367,2.72E-18,Cells_Transformed_fibroblasts	r2(rs1478894,rs5889367)=0.157	RP11-148O21.6,rs1478894,2.21E-13	RP11-148O21.6,rs5889367,5.88E-20,Cells_Transformed_fibroblasts	r2(rs1478894,rs5889367)=0.157	RP11-148O21.2,rs1478894,4.27E-12	RP11-148O21.2,rs5889367,5.75E-16,Cells_Transformed_fibroblasts	r2(rs1478894,rs5889367)=0.157	FDFT1,rs1478894,7.49E-11	FDFT1,rs796427599,1.44E-37,Artery_Tibial	r2(rs1478894,rs796427599)=NA	8	11591245	rs1478894	C	T	0.54	0.48	0.94	0.36				HRT, SPLN, LIV			4 altered motifs			40 hits	9.9kb 3' of LINC00208	9.9kb 3' of NCRNA00208
14	rs4840573	11463230	LINC00208	8	11605721	LINC00208	3.93504e-09	1f	AF131215.2(Skin_Sun_Exposed_Lower_leg,1.73E-11);RP11-148O21.4(Cells_Transformed_fibroblasts,7.82E-11);AF131215.9(Thyroid,1.08E-10);AF131215.9(Esophagus_Mucosa,1.35E-10);AF131215.2(Esophagus_Mucosa,1.95E-10);RP11-148O21.3(Cells_Transformed_fibroblasts,2.37E-10);RP11-148O21.6(Cells_Transformed_fibroblasts,5.29E-10);RP11-481A20.10(Brain_Cerebellum,1.70E-09);FDFT1(Artery_Tibial,1.17E-08);RP11-481A20.…	AF131215.2,rs4840573,1.73E-11	AF131215.2,rs36089015,3.07E-31,Skin_Sun_Exposed_Lower_leg	r2(rs4840573,rs36089015)=0.194	RP11-148O21.4,rs4840573,7.82E-11	RP11-148O21.4,rs5889367,2.72E-18,Cells_Transformed_fibroblasts	r2(rs4840573,rs5889367)=0.099	AF131215.9,rs4840573,1.08E-10	AF131215.9,rs11778398,2.26E-30,Lung	r2(rs4840573,rs11778398)=0.18	RP11-148O21.3,rs4840573,2.37E-10	RP11-148O21.3,rs5889367,2.67E-20,Cells_Transformed_fibroblasts	r2(rs4840573,rs5889367)=0.099	RP11-148O21.6,rs4840573,5.29E-10	RP11-148O21.6,rs5889367,5.88E-20,Cells_Transformed_fibroblasts	r2(rs4840573,rs5889367)=0.099	8	11605721	rs4840573	G	A	0.11	0.32	0.01	0.41				LIV	ESDR,BLD		4 altered motifs		2 hits	44 hits	24kb 3' of LINC00208	24kb 3' of NCRNA00208
15	rs13280442	11467557	LINC00208	8	11610048	LOC105379242	6.25946e-09	6	AF131215.2(Esophagus_Mucosa,1.94E-15);AF131215.9(Thyroid,3.81E-15);RP11-148O21.4(Cells_Transformed_fibroblasts,5.68E-15);AF131215.9(Esophagus_Mucosa,9.77E-15);AF131215.2(Skin_Sun_Exposed_Lower_leg,5.59E-14);FAM66A(Brain_Caudate_basal_ganglia,7.88E-14);RP11-148O21.3(Cells_Transformed_fibroblasts,9.87E-14);RP11-148O21.6(Cells_Transformed_fibroblasts,6.45E-13);AF131215.2(Nerve_Tibial,1.04E-11);RP11-…	AF131215.2,rs13280442,1.94E-15	AF131215.2,rs36089015,3.07E-31,Skin_Sun_Exposed_Lower_leg	r2(rs13280442,rs36089015)=0.201	AF131215.9,rs13280442,3.81E-15	AF131215.9,rs11778398,2.26E-30,Lung	r2(rs13280442,rs11778398)=0.191	RP11-148O21.4,rs13280442,5.68E-15	RP11-148O21.4,rs5889367,2.72E-18,Cells_Transformed_fibroblasts	r2(rs13280442,rs5889367)=0.118	FAM66A,rs13280442,7.88E-14	FAM66A,rs2739967,1.88E-21,Skin_Sun_Exposed_Lower_leg	r2(rs13280442,rs2739967)=0.001	RP11-148O21.3,rs13280442,9.87E-14	RP11-148O21.3,rs5889367,2.67E-20,Cells_Transformed_fibroblasts	r2(rs13280442,rs5889367)=0.118	8	11610048	rs13280442	C	G	0.16	0.37	0.01	0.46							6 altered motifs			72 hits	29kb 3' of LINC00208	29kb 3' of NCRNA00208
16	rs77779142	65599656	SNX32	11	65832185	SNX32	3.89416e-08	7	SNX32(Cells_Transformed_fibroblasts,5.18E-70);SNX32(Nerve_Tibial,1.77E-51);SNX32(Esophagus_Muscularis,5.97E-51);SNX32(Skin_Sun_Exposed_Lower_leg,6.97E-51);SNX32(Adipose_Visceral_Omentum,7.53E-49);SNX32(Adipose_Subcutaneous,2.16E-46);CTSW(Thyroid,5.52E-46);SNX32(Esophagus_Mucosa,7.12E-45);SNX32(Skin_Not_Sun_Exposed_Suprapubic,4.90E-43);SNX32(Thyroid,5.97E-42);SNX32(Artery_Aorta,2.88E-36);SNX32(Col…	SNX32,rs77779142,5.18E-70	SNX32,rs17854357,3.74E-78,Cells_Transformed_fibroblasts	r2(rs77779142,rs17854357)=0.654	CTSW,rs77779142,5.52E-46	CTSW,rs656980,3.34E-77,Thyroid	r2(rs77779142,rs656980)=0.25	FIBP,rs77779142,1.14E-30	FIBP,rs583887,3.87E-37,Muscle_Skeletal	r2(rs77779142,rs583887)=0.251	RNASEH2C,rs77779142,7.23E-10	RNASEH2C,rs3372,1.10E-29,Artery_Tibial	r2(rs77779142,rs3372)=0.1				11	65832185	rs77779142	C	T	0.07	0.14	0.17	0.16				4 tissues						90 hits	CFL1	1.8kb 5' of SNX32
17	rs111700101	11544162	CCDC151	19	11433340	CCDC151	2.78495e-08	7	PRKCSH(Thyroid,1.75E-08);PRKCSH(Adipose_Visceral_Omentum,1.96E-08)	PRKCSH,rs111700101,1.75E-08	PRKCSH,rs8101357,5.35E-12,Thyroid	r2(rs111700101,rs8101357)=0.184													19	11433340	rs111700101	G	A	0.09	0.13	0.03	0.06					BLD		Maf,NRSF,Smad			2 hits	CCDC151	CCDC151	intronic
Target genes (Tissues and P-Values). Association findings from European Ancestry (novel) and correlated meta-analysis (novel variants). The annotation of variants was sourced from NCBI dbSNP build 138 (hg19) during the analyses and updated to dbSNP build 150 (hg38) for reporting results. Abbreviations: Nb, order number based on SNVs; Position, dbSNP build 150 (hg38) annotation; Variant, single nu…
